# Supplementary material for: Conveying tactile object characteristics through customized intracortical microstimulation of the human somatosensory cortex
Source: Nat Commun. 2025 May 1;16:4017. doi: 10.1038/s41467-025-58616-6 (PMC12046030; doi:10.1038/s41467-025-58616-6)
Supplement: Supplementary file 4 — Source Data [file 41467_2025_58616_MOESM4_ESM.xlsx]

## Sheet: Figure 2a
Figure 2a
	P2	x-limits: [20, 440]	y-limits: [90, 650]	x-limits: [470, 890]	y-limits: [90, 650]		P3	x-limits: [20, 440]	y-limits: [90, 650]	x-limits: [470, 890]	y-limits: [90, 650]		C1	x-limits: [20, 490]	y-limits: [120, 910]	x-limits: [565 ,1025]	y-limits: [120, 910]
	Stimulated setting (1 = stimulation, 0 = no stimulation)	Cursor-X left (blue) rectangle	Cursor-Y left (blue) rectangle	Cursor-X right (green) rectangle	Cursor-Y right (green) rectangle		Stimulated setting (1 = stimulation, 0 = no stimulation)	Cursor-X left (blue) rectangle	Cursor-Y left (blue) rectangle	Cursor-X right (green) rectangle	Cursor-Y right (green) rectangle		Stimulated setting (1 = stimulation, 0 = no stimulation)	Cursor-X left (blue) rectangle	Cursor-Y left (blue) rectangle	Cursor-X right (green) rectangle	Cursor-Y right (green) rectangle
	0	311	456	873	430		0	129	455	835	460		0	0	0	0	0
	0	311	456	873	430		0	129	455	835	460		0	0	0	0	0
	0	311	456	873	430		0	129	455	835	460		0	0	0	0	0
	0	311	456	873	430		0	129	455	835	460		0	0	0	0	0
	0	311	456	873	430		0	129	455	835	460		0	0	0	0	0
	0	311	456	873	430		0	129	455	835	460		0	0	0	0	0
	0	311	456	873	430		0	129	455	835	460		0	0	0	0	0
	0	311	456	873	430		0	129	455	835	460		0	0	0	0	0
	0	311	456	873	430		0	129	455	835	460		0	0	0	0	0
	0	311	456	873	430		0	129	455	835	460		0	0	0	0	0
	0	311	456	873	430		0	129	455	835	460		0	0	0	0	0
	0	311	456	873	430		0	129	455	835	460		0	0	0	0	0
	0	311	456	873	430		0	129	455	835	460		0	0	0	0	0
	0	311	456	873	430		0	129	455	835	460		0	0	0	0	0
	0	311	456	873	430		0	129	455	835	460		0	0	0	0	0
	0	311	456	873	430		0	129	455	835	460		0	0	0	0	0
	0	311	456	873	430		0	129	455	835	460		0	0	0	0	0
	0	311	456	873	430		0	129	455	835	460		0	0	0	0	0
	0	311	456	873	430		0	129	455	835	460		0	0	0	0	0
	0	311	456	873	430		0	129	455	835	460		0	0	0	0	0
	0	311	456	873	430		0	129	455	835	460		0	0	0	0	0
	0	311	456	873	430		0	129	455	835	460		0	0	0	0	0
	0	311	456	873	430		0	129	455	835	460		0	0	0	0	0
	0	311	456	873	430		0	129	455	835	460		0	0	0	0	0
	0	311	456	873	430		0	129	455	835	460		0	0	0	0	0
	0	311	456	873	430		0	129	455	835	460		0	0	0	0	0
	0	311	456	873	430		0	129	455	835	460		0	0	0	0	0
	0	311	456	873	430		0	129	455	835	460		0	0	0	0	0
	0	311	456	873	430		0	129	455	835	460		0	0	0	0	0
	0	311	456	873	430		0	129	455	835	460		0	0	0	0	0
	0	311	456	873	430		0	129	455	835	460		0	0	0	0	0
	0	311	456	873	430		0	129	455	835	460		0	0	0	0	0
	0	311	456	873	430		0	129	455	835	460		0	0	0	0	0
	0	311	456	873	430		0	129	455	835	460		0	0	0	0	0
	0	311	456	873	430		0	129	455	835	460		0	0	0	0	0
	0	311	456	873	430		0	129	455	835	460		0	0	0	0	0
	0	311	456	873	430		0	129	455	835	460		0	0	0	0	0
	0	311	456	873	430		0	129	455	835	460		0	0	0	0	0
	0	311	456	873	430		0	129	455	835	460		0	0	0	0	0
	0	311	456	873	430		0	129	455	835	460		0	0	0	0	0
	0	311	456	873	430		0	129	455	835	460		0	0	0	0	0
	0	311	456	873	430		0	129	455	835	460		0	0	0	0	0
	0	311	456	873	430		0	129	455	835	460		0	0	0	0	0
	0	311	456	873	430		0	129	455	835	460		0	0	0	0	0
	0	311	456	873	430		0	129	455	835	460		0	0	0	0	0
	0	311	456	873	430		0	129	455	835	460		0	0	0	0	0
	0	311	456	873	430		0	129	455	835	460		0	0	0	0	0
	0	311	456	873	430		0	129	455	835	460		0	0	0	0	0
	0	311	456	873	430		0	129	455	835	460		0	0	0	0	0
	0	311	456	873	430		0	129	455	835	460		0	0	0	0	0
	0	311	456	873	430		0	129	455	835	460		0	0	0	0	0
	0	311	456	873	430		0	129	455	835	460		0	0	0	0	0
	0	311	456	873	430		0	129	455	835	460		0	0	0	0	0
	0	311	456	873	430		0	129	455	835	460		0	0	0	0	0
	0	311	456	873	430		0	129	455	835	460		0	0	0	0	0
	0	311	456	873	430		0	129	455	835	460		0	0	0	0	0
	0	311	456	873	430		0	129	455	835	460		0	0	0	0	0
	0	311	456	873	430		0	129	455	835	460		0	0	0	0	0
	0	311	456	873	430		0	129	455	835	460		0	0	0	0	0
	0	311	456	873	430		0	129	455	835	460		0	0	0	0	0
	0	311	456	873	430		0	129	455	835	460		0	0	0	0	0
	0	311	456	873	430		0	129	455	835	460		0	0	0	0	0
	0	311	456	873	430		0	129	455	835	460		0	0	0	0	0
	0	311	456	873	430		0	129	455	835	460		0	0	0	0	0
	0	311	456	873	430		0	129	455	835	460		0	0	0	0	0
	0	311	456	873	430		0	129	455	835	460		0	0	0	0	0
	0	311	456	873	430		0	129	455	835	460		0	0	0	0	0
	0	311	456	873	430		0	129	455	835	460		0	0	0	0	0
	0	311	456	873	430		0	129	455	835	460		0	0	0	0	0
	0	311	456	873	430		0	129	455	835	460		0	0	0	0	0
	0	311	456	873	430		0	129	455	835	460		0	0	0	0	0
	0	311	456	873	430		0	129	455	835	460		0	0	0	0	0
	0	311	456	873	430		0	129	455	835	460		0	0	0	0	0
	0	311	456	873	430		0	129	455	835	460		0	0	0	0	0
	0	311	456	873	430		0	129	455	835	460		0	0	0	0	0
	0	311	456	873	430		0	129	455	835	460		0	0	0	0	0
	0	311	456	873	430		0	129	455	835	460		0	0	0	0	0
	0	311	456	873	430		0	129	455	835	460		0	0	0	0	0
	0	311	456	873	430		0	129	455	835	460		0	0	0	0	0
	0	311	456	873	430		0	129	455	835	460		0	0	0	0	0
	0	311	456	873	430		0	129	455	835	460		0	0	0	0	0
	0	311	456	873	430		0	129	455	835	460		0	0	0	0	0
	0	311	456	873	430		0	129	455	835	460		0	0	0	0	0
	0	311	456	873	430		0	129	455	835	460		0	0	0	0	0
	0	311	456	873	430		0	129	455	835	460		0	0	0	0	0
	0	311	456	873	430		0	129	455	835	460		0	0	0	0	0
	0	311	456	873	430		0	129	455	835	460		0	0	0	0	0
	0	311	456	873	430		0	129	455	835	460		0	0	0	0	0
	0	311	456	873	430		0	129	455	835	460		0	0	0	0	0
	0	311	456	873	430		0	129	455	835	460		0	0	0	0	0
	0	311	456	873	430		0	129	455	835	460		0	0	0	0	0
	0	311	456	873	430		0	129	455	835	460		0	0	0	0	0
	0	311	456	873	430		0	129	455	835	460		0	0	0	0	0
	0	311	456	873	430		0	129	455	835	460		0	0	0	0	0
	0	311	456	873	430		0	129	455	835	460		0	0	0	0	0
	0	311	456	873	430		0	129	455	835	460		0	0	0	0	0
	0	311	456	873	430		0	129	455	835	460		0	0	0	0	0
	0	311	456	873	430		0	129	455	835	460		0	0	0	0	0
	0	311	456	873	430		0	129	455	835	460		0	0	0	0	0
	0	311	456	873	430		0	129	455	835	460		0	0	0	0	0
	0	311	456	873	430		0	129	455	835	460		0	0	0	0	0
	0	311	456	873	430		0	129	455	835	460		0	0	0	0	0
	0	311	456	873	430		0	129	455	835	460		0	0	0	0	0
	0	311	456	873	430		0	129	455	835	460		0	0	0	0	0
	0	311	456	873	430		0	129	455	835	460		0	0	0	0	0
	0	311	456	873	430		0	129	455	835	460		0	0	0	0	0
	0	311	456	873	430		0	129	455	835	460		0	0	0	0	0
	0	311	456	873	430		0	129	455	835	460		0	0	0	0	0
	0	311	456	873	430		0	129	455	835	460		0	0	0	0	0
	0	311	456	873	430		0	129	455	835	460		0	0	0	0	0
	0	311	456	873	430		0	129	455	835	460		0	0	0	0	0
	0	311	456	873	430		0	129	455	835	460		0	0	0	0	0
	0	311	456	873	430		0	129	455	835	460		0	0	0	0	0
	0	311	456	873	430		0	129	455	835	460		0	0	0	0	0
	0	311	456	873	430		0	129	455	835	460		0	0	0	0	0
	0	311	456	873	430		0	129	455	835	460		0	0	0	0	0
	0	311	456	873	430		0	129	455	835	460		0	0	0	0	0
	0	311	456	873	430		0	129	455	835	460		0	0	0	0	0
	0	311	456	873	430		0	129	455	835	460		0	0	0	0	0
	0	311	456	873	430		0	129	455	835	460		0	0	0	0	0
	0	311	456	873	430		0	129	455	835	460		0	0	0	0	0
	0	311	456	873	430		0	129	455	835	460		0	0	0	0	0
	0	311	456	873	430		0	129	455	835	460		0	0	0	0	0
	0	311	456	873	430		0	129	455	835	460		0	0	0	0	0
	0	311	456	873	430		0	129	455	835	460		0	0	0	0	0
	0	311	456	873	430		0	129	455	835	460		0	0	0	0	0
	0	311	456	873	430		0	129	455	835	460		0	0	0	0	0
	0	311	456	873	430		0	129	455	835	460		0	0	0	0	0
	0	311	456	873	430		0	129	455	835	460		0	0	0	0	0
	0	311	456	873	430		0	129	455	835	460		0	0	0	0	0
	0	311	456	873	430		0	129	455	835	460		0	0	0	0	0
	0	311	456	873	430		0	129	455	835	460		0	0	0	0	0
	0	311	456	873	430		0	129	455	835	460		0	0	0	0	0
	0	311	456	873	430		0	129	455	835	460		0	0	0	0	0
	0	311	456	873	430		0	129	455	835	460		0	0	0	0	0
	0	311	456	873	430		0	129	455	835	460		0	0	0	0	0
	0	311	456	873	430		0	129	455	835	460		0	0	0	0	0
	0	311	456	873	430		0	129	455	835	460		0	0	0	0	0
	0	311	456	873	430		0	129	455	835	460		0	0	0	0	0
	0	311	456	873	430		0	129	455	835	460		0	0	0	0	0
	0	311	456	873	430		0	129	455	835	460		0	0	0	0	0
	0	311	456	873	430		0	129	455	835	460		0	0	0	0	0
	0	311	456	873	430		0	129	455	835	460		0	0	0	0	0
	0	311	456	873	430		0	129	455	835	460		0	0	0	0	0
	0	311	456	873	430		0	129	455	835	460		0	0	0	0	0
	0	311	456	873	430		0	129	455	835	460		0	0	0	0	0
	0	311	456	873	430		0	129	455	835	460		0	0	0	0	0
	0	311	456	873	430		0	129	455	835	460		0	0	0	0	0
	0	311	456	873	430		0	129	455	835	460		0	0	0	0	0
	0	311	456	873	430		0	129	455	835	460		0	0	0	0	0
	0	311	456	873	430		0	129	455	835	460		0	0	0	0	0
	0	311	456	873	430		0	129	455	835	460		0	0	0	0	0
	0	311	456	873	430		0	129	455	835	460		0	0	0	0	0
	0	311	456	873	430		0	129	455	835	460		0	0	0	0	0
	0	311	456	873	430		0	129	455	835	460		0	0	0	0	0
	0	311	456	873	430		0	129	455	835	460		0	0	0	0	0
	0	311	456	873	430		0	129	455	835	460		0	0	0	0	0
	0	311	456	873	430		0	129	455	835	460		0	0	0	0	0
	0	311	456	873	430		0	129	455	835	460		0	0	0	0	0
	0	311	456	873	430		0	129	455	835	460		0	0	0	0	0
	0	311	456	873	430		0	129	455	835	460		0	0	0	0	0
	0	311	456	873	430		0	129	455	835	460		0	0	0	0	0
	0	311	456	873	430		0	129	455	835	460		0	0	0	0	0
	0	311	456	873	430		0	129	455	835	460		0	0	0	0	0
	0	311	456	873	430		0	129	455	835	460		0	0	0	0	0
	0	311	456	873	430		0	129	455	835	460		0	0	0	0	0
	0	311	456	873	430		0	129	455	835	460		0	0	0	0	0
	0	311	456	873	430		0	129	455	835	460		0	0	0	0	0
	0	62	565	873	430		0	129	455	835	460		0	0	0	0	0
	0	49	585	873	430		0	129	455	835	460		0	0	0	0	0
	0	40	595	873	430		0	129	455	835	460		0	0	0	0	0
	0	27	611	873	430		0	129	455	835	460		0	0	0	0	0
	0	24	615	873	430		0	129	455	835	460		0	0	0	0	0
	0	24	615	873	430		0	129	455	835	460		0	0	0	0	0
	0	24	615	873	430		0	129	455	835	460		0	0	0	0	0
	0	24	615	873	430		0	129	455	835	460		0	0	0	0	0
	0	24	615	873	430		0	129	455	835	460		0	0	0	0	0
	0	24	615	873	430		0	129	455	835	460		0	0	0	0	0
	0	24	615	873	430		0	129	455	835	460		0	0	0	0	0
	0	24	615	873	430		0	129	455	835	460		0	0	0	0	0
	0	24	615	873	430		0	129	455	835	460		0	0	0	0	0
	0	24	615	873	430		0	129	455	835	460		0	0	0	0	0
	0	24	615	873	430		0	129	455	835	460		0	0	0	0	0
	0	24	615	873	430		0	129	455	835	460		0	0	0	0	0
	0	24	615	873	430		0	129	455	835	460		0	0	0	0	0
	0	24	615	873	430		0	129	455	835	460		0	0	0	0	0
	0	24	615	873	430		0	129	455	835	460		0	0	0	0	0
	0	24	615	873	430		0	129	455	835	460		0	0	0	0	0
	0	24	615	873	430		0	129	455	835	460		0	0	0	0	0
	0	24	615	873	430		0	129	455	835	460		0	0	0	0	0
	0	24	615	873	430		0	129	455	835	460		0	0	0	0	0
	0	24	615	873	430		0	129	455	835	460		0	0	0	0	0
	0	24	615	873	430		0	129	455	835	460		0	0	0	0	0
	0	24	615	873	430		0	129	455	835	460		0	0	0	0	0
	0	24	615	873	430		0	129	455	835	460		0	0	0	0	0
	0	24	615	873	430		0	129	455	835	460		0	0	0	0	0
	0	24	615	873	430		0	129	455	835	460		0	0	0	0	0
	0	24	615	873	430		0	129	455	835	460		0	0	0	0	0
	0	24	615	873	430		0	129	455	835	460		0	0	0	0	0
	0	24	615	873	430		0	129	455	835	460		0	0	0	0	0
	0	24	615	873	430		0	200	606	835	460		0	0	0	0	0
	0	24	615	873	430		0	206	613	835	460		0	0	0	0	0
	0	24	615	873	430		0	209	611	835	460		0	0	0	0	0
	0	24	615	873	430		0	213	609	835	460		0	0	0	0	0
	0	24	615	873	430		0	213	609	835	460		0	0	0	0	0
	0	24	615	873	430		0	213	609	835	460		0	0	0	0	0
	0	24	615	873	430		0	213	609	835	460		0	0	0	0	0
	0	24	615	873	430		0	213	609	835	460		0	0	0	0	0
	0	24	615	873	430		0	213	609	835	460		0	0	0	0	0
	0	24	615	873	430		0	213	609	835	460		0	0	0	0	0
	0	24	615	873	430		0	213	609	835	460		0	0	0	0	0
	0	24	615	873	430		0	213	609	835	460		0	0	0	0	0
	0	24	615	873	430		0	213	609	835	460		0	0	0	0	0
	0	24	615	873	430		0	213	609	835	460		0	0	0	0	0
	0	24	615	873	430		0	213	609	835	460		0	0	0	0	0
	0	24	615	873	430		0	213	609	835	460		0	0	0	0	0
	0	24	615	873	430		0	213	609	835	460		0	0	0	0	0
	0	24	615	873	430		0	213	609	835	460		0	0	0	0	0
	0	24	615	873	430		0	213	609	835	460		0	0	0	0	0
	0	24	615	873	430		0	213	609	835	460		0	0	0	0	0
	0	24	615	873	430		0	213	609	835	460		0	0	0	0	0
	0	24	615	873	430		0	213	609	835	460		0	0	0	0	0
	0	24	615	873	430		0	213	609	835	460		0	0	0	0	0
	0	24	615	873	430		0	213	609	835	460		0	0	0	0	0
	0	24	615	873	430		0	213	609	835	460		0	0	0	0	0
	0	24	615	873	430		0	213	609	835	460		0	0	0	0	0
	0	24	615	873	430		0	213	609	835	460		0	0	0	0	0
	0	24	615	873	430		0	213	609	835	460		0	0	0	0	0
	0	24	615	873	430		0	213	609	835	460		0	0	0	0	0
	0	24	615	873	430		0	213	609	835	460		0	0	0	0	0
	0	24	615	873	430		0	213	609	835	460		0	0	0	0	0
	0	24	615	873	430		0	213	609	835	460		0	0	0	0	0
	0	24	615	873	430		0	213	609	835	460		0	0	0	0	0
	0	24	615	873	430		0	213	609	835	460		0	0	0	0	0
	0	24	615	873	430		0	213	609	835	460		0	0	0	0	0
	0	24	615	873	430		0	213	609	835	460		0	0	0	0	0
	0	24	615	873	430		0	213	609	835	460		0	0	0	0	0
	0	49	588	873	430		0	213	609	835	460		0	0	0	0	0
	0	46	599	873	430		0	213	609	835	460		0	0	0	0	0
	0	42	606	873	430		0	213	609	835	460		0	0	0	0	0
	0	39	615	873	430		0	213	609	835	460		0	0	0	0	0
	0	34	632	873	430		0	213	609	835	460		0	0	0	0	0
	0	34	632	873	430		0	213	609	835	460		0	0	0	0	0
	0	32	641	873	430		0	213	609	835	460		0	0	0	0	0
	0	32	641	873	430		0	213	609	835	460		0	0	0	0	0
	0	32	641	873	430		0	213	609	835	460		0	0	0	0	0
	0	32	641	873	430		0	213	609	835	460		0	0	0	0	0
	0	32	641	873	430		0	213	609	835	460		0	0	0	0	0
	0	32	641	873	430		0	213	609	835	460		0	0	0	0	0
	0	32	641	873	430		0	213	609	835	460		0	0	0	0	0
	0	32	641	873	430		0	213	609	835	460		0	0	0	0	0
	0	32	641	873	430		0	213	609	835	460		0	0	0	0	0
	0	32	641	873	430		0	213	609	835	460		0	0	0	0	0
	0	32	641	873	430		0	213	609	835	460		0	0	0	0	0
	0	32	641	873	430		0	213	609	835	460		0	0	0	0	0
	0	32	641	873	430		0	213	609	835	460		0	0	0	0	0
	0	32	641	873	430		0	213	609	835	460		0	0	0	0	0
	0	32	641	873	430		0	213	609	835	460		0	0	0	0	0
	0	32	641	873	430		0	213	609	835	460		0	0	0	0	0
	0	32	641	873	430		0	213	609	835	460		0	0	0	0	0
	0	32	641	873	430		0	213	609	835	460		0	0	0	0	0
	0	32	641	873	430		0	213	609	835	460		0	0	0	0	0
	0	32	641	873	430		0	213	609	835	460		0	0	0	0	0
	0	32	641	873	430		0	213	609	835	460		0	0	0	0	0
	0	32	641	873	430		0	213	609	835	460		0	0	0	0	0
	0	32	641	873	430		0	213	609	835	460		0	0	0	0	0
	0	32	641	873	430		0	213	609	835	460		0	0	0	0	0
	0	32	641	873	430		0	213	609	835	460		0	0	0	0	0
	0	32	641	873	430		0	213	609	835	460		0	0	0	0	0
	0	32	641	873	430		0	213	609	835	460		0	0	0	0	0
	0	32	641	873	430		0	213	609	835	460		0	0	0	0	0
	0	32	641	873	430		0	213	609	835	460		0	0	0	0	0
	0	32	641	873	430		0	213	609	835	460		0	0	0	0	0
	0	32	641	873	430		0	213	609	835	460		0	0	0	0	0
	0	32	641	873	430		0	213	609	835	460		0	0	0	0	0
	0	32	641	873	430		0	213	609	835	460		0	0	0	0	0
	0	32	641	873	430		0	213	609	835	460		0	0	0	0	0
	0	32	641	873	430		0	213	609	835	460		0	0	0	0	0
	0	32	641	873	430		0	213	609	835	460		0	0	0	0	0
	0	32	641	873	430		0	213	609	835	460		0	0	0	0	0
	0	32	641	873	430		0	213	609	835	460		0	0	0	0	0
	0	32	641	873	430		0	213	609	835	460		0	0	0	0	0
	0	32	641	873	430		0	213	609	835	460		0	0	0	0	0
	0	32	641	873	430		0	213	609	835	460		0	0	0	0	0
	0	32	641	873	430		0	213	609	835	460		0	0	0	0	0
	0	32	641	873	430		0	213	609	835	460		0	0	0	0	0
	0	32	641	873	430		0	213	609	835	460		0	0	0	0	0
	0	32	641	873	430		0	213	609	835	460		0	0	0	0	0
	0	32	641	873	430		0	213	609	835	460		0	0	0	0	0
	0	32	641	873	430		0	213	609	835	460		0	0	0	0	0
	0	32	641	873	430		0	213	609	835	460		0	0	0	0	0
	0	32	641	873	430		0	213	609	835	460		0	0	0	0	0
	0	32	641	873	430		0	213	609	835	460		0	0	0	0	0
	0	32	641	873	430		0	213	609	835	460		0	0	0	0	0
	0	32	641	873	430		0	213	609	835	460		0	0	0	0	0
	0	51	618	873	430		0	213	609	835	460		0	0	0	0	0
	0	51	618	873	430		0	213	609	835	460		0	0	0	0	0
	0	46	622	873	430		0	213	609	835	460		0	0	0	0	0
	0	38	632	873	430		0	213	609	835	460		0	0	0	0	0
	0	34	636	873	430		0	213	609	835	460		0	0	0	0	0
	0	34	636	873	430		0	213	609	835	460		0	0	0	0	0
	0	34	636	873	430		0	213	609	835	460		0	0	0	0	0
	0	34	636	873	430		0	213	609	682	622		0	0	0	0	0
	0	34	636	873	430		0	213	609	682	624		0	0	0	0	0
	0	34	636	873	430		0	213	609	686	627		0	0	0	0	0
	0	34	636	873	430		0	213	609	686	627		0	0	0	0	0
	0	34	636	873	430		0	213	609	686	627		0	0	0	0	0
	0	34	636	873	430		0	213	609	686	627		0	0	0	0	0
	0	34	636	873	430		0	213	609	686	627		0	0	0	0	0
	0	34	636	873	430		0	213	609	686	627		0	0	0	0	0
	0	34	636	873	430		0	213	609	686	627		0	0	0	0	0
	0	34	636	873	430		0	213	609	686	627		0	0	0	0	0
	0	34	636	873	430		0	213	609	686	627		0	0	0	0	0
	0	34	636	873	430		0	213	609	686	627		0	0	0	0	0
	0	34	636	873	430		0	213	609	686	627		0	0	0	0	0
	0	34	636	873	430		0	213	609	686	627		0	0	0	0	0
	0	34	636	873	430		0	213	609	686	627		0	0	0	0	0
	0	34	636	873	430		0	213	609	686	627		0	0	0	0	0
	0	34	636	873	430		0	213	609	686	627		0	0	0	0	0
	0	34	636	873	430		0	213	609	686	627		0	0	0	0	0
	0	34	636	873	430		0	213	609	686	627		0	0	0	0	0
	0	34	636	873	430		0	213	609	686	627		0	0	0	0	0
	0	34	636	873	430		0	213	609	686	627		0	0	0	0	0
	0	34	636	873	430		0	213	609	686	627		0	0	0	0	0
	0	34	636	873	430		0	213	609	686	627		0	0	0	0	0
	0	34	636	873	430		0	213	609	686	627		0	0	0	0	0
	0	34	636	873	430		0	213	609	686	627		0	0	0	0	0
	0	34	636	873	430		0	213	609	686	627		0	0	0	0	0
	0	34	636	873	430		0	213	609	686	627		0	0	0	0	0
	0	34	636	873	430		0	213	609	686	627		0	0	0	0	0
	0	34	636	873	430		0	213	609	686	627		0	0	0	0	0
	0	34	636	873	430		0	213	609	686	627		0	0	0	0	0
	0	34	636	873	430		0	213	609	686	627		0	0	0	0	0
	0	34	636	873	430		0	213	609	686	627		0	0	0	0	0
	0	34	636	873	430		0	213	609	686	627		0	0	0	0	0
	0	34	636	873	430		0	213	609	686	627		0	0	0	0	0
	0	34	636	873	430		0	213	609	686	627		0	0	0	0	0
	0	34	636	873	430		0	213	609	686	627		0	0	0	0	0
	0	34	636	873	430		0	213	609	686	627		0	0	0	0	0
	0	34	636	873	430		0	213	609	686	627		0	0	0	0	0
	0	34	636	873	430		0	213	609	686	627		0	0	0	0	0
	0	34	636	873	430		0	213	609	686	627		0	0	0	0	0
	0	34	636	873	430		0	213	609	686	627		0	0	0	0	0
	0	34	636	873	430		0	213	609	686	627		0	0	0	0	0
	0	34	636	873	430		0	213	609	686	627		0	0	0	0	0
	0	34	636	873	430		0	213	609	686	627		0	0	0	0	0
	0	34	636	873	430		0	213	609	686	627		0	0	0	0	0
	0	34	636	873	430		0	213	609	686	627		0	0	0	0	0
	0	34	636	873	430		0	213	609	686	627		0	0	0	0	0
	0	34	636	873	430		0	213	609	686	627		0	0	0	0	0
	0	34	636	873	430		0	213	609	686	627		0	0	0	0	0
	0	34	636	873	430		0	213	609	686	627		0	0	0	0	0
	0	34	636	873	430		0	213	609	686	627		0	0	0	0	0
	0	34	636	873	430		0	213	609	686	627		0	0	0	0	0
	0	34	636	873	430		0	213	609	686	627		0	0	0	0	0
	0	34	636	873	430		0	213	609	686	627		0	0	0	0	0
	0	34	636	873	430		0	213	609	686	627		0	0	0	0	0
	0	34	636	873	430		0	213	609	686	627		0	0	0	0	0
	0	34	636	873	430		0	213	609	686	627		0	0	0	0	0
	0	34	636	873	430		0	213	609	686	627		0	0	0	0	0
	0	34	636	873	430		0	213	609	686	627		0	0	0	0	0
	0	34	636	873	430		0	213	609	686	627		0	0	0	0	0
	0	34	636	873	430		0	213	609	686	627		0	0	0	0	0
	0	34	636	873	430		0	213	609	686	627		0	0	0	0	0
	0	34	636	873	430		0	213	609	686	627		0	0	0	0	0
	0	34	636	873	430		0	213	609	686	627		0	0	0	0	0
	0	34	636	873	430		0	213	609	686	627		0	0	0	0	0
	0	34	636	873	430		0	213	609	686	627		0	0	0	0	0
	0	34	636	873	430		0	213	609	686	627		0	0	0	0	0
	0	34	636	873	430		0	213	609	686	627		0	0	0	0	0
	0	34	636	873	430		0	213	609	686	627		0	0	0	0	0
	0	34	636	873	430		0	213	609	686	627		0	0	0	0	0
	0	34	636	873	430		0	213	609	686	627		0	0	0	0	0
	0	34	636	873	430		0	213	609	686	627		0	0	0	0	0
	0	34	636	873	430		0	213	609	686	627		0	0	0	0	0
	0	34	636	873	430		0	213	609	686	627		0	0	0	0	0
	0	34	636	873	430		0	213	609	686	627		0	0	0	0	0
	0	34	636	873	430		0	213	609	686	627		0	0	0	0	0
	0	34	636	873	430		0	213	609	686	627		0	0	0	0	0
	0	34	636	873	430		0	213	609	686	627		0	0	0	0	0
	0	34	636	873	430		0	213	609	686	627		0	0	0	0	0
	0	34	636	873	430		0	213	609	686	627		0	0	0	0	0
	0	34	636	873	430		0	213	609	686	627		0	0	0	0	0
	0	34	636	873	430		0	213	609	686	627		0	0	0	0	0
	0	34	636	873	430		0	213	609	686	627		0	0	0	0	0
	0	34	636	873	430		0	213	609	686	627		0	0	0	0	0
	0	34	636	873	430		0	213	609	686	627		0	0	0	0	0
	0	34	636	873	430		0	213	609	686	627		0	0	0	0	0
	0	34	636	873	430		0	213	609	686	627		0	0	0	0	0
	0	34	636	873	430		0	213	609	686	627		0	0	0	0	0
	0	34	636	873	430		0	213	609	686	627		0	0	0	0	0
	0	34	636	873	430		0	213	609	686	627		0	0	0	0	0
	0	34	636	873	430		0	213	609	686	627		0	0	0	0	0
	0	34	636	873	430		0	213	609	686	627		0	0	0	0	0
	0	34	636	873	430		0	213	609	686	627		0	0	0	0	0
	0	34	636	873	430		0	213	609	686	627		0	0	0	0	0
	0	34	636	873	430		0	213	609	686	627		0	0	0	0	0
	0	34	636	873	430		0	213	609	686	627		0	0	0	0	0
	0	34	636	873	430		0	213	609	686	627		0	0	0	0	0
	0	34	636	873	430		0	213	609	686	627		0	0	0	0	0
	0	34	636	873	430		0	213	609	686	627		0	0	0	0	0
	0	34	636	873	430		0	213	609	686	627		0	0	0	0	0
	0	34	636	873	430		0	213	609	686	627		0	0	0	0	0
	0	34	636	873	430		0	213	609	686	627		0	0	0	0	0
	0	34	636	873	430		0	213	609	686	627		0	0	0	0	0
	0	34	636	873	430		0	213	609	686	627		0	0	0	0	0
	0	34	636	873	430		0	213	609	686	627		0	0	0	0	0
	0	34	636	873	430		0	213	609	686	627		0	0	0	0	0
	0	48	636	873	430		0	213	609	686	627		0	0	0	0	0
	0	44	638	873	430		0	213	609	686	627		0	0	0	0	0
	0	40	641	873	430		0	213	609	686	627		0	0	0	0	0
	0	40	641	873	430		0	213	609	686	627		0	0	0	0	0
	0	40	641	873	430		0	213	609	686	627		0	0	0	0	0
	0	40	641	873	430		0	213	609	686	627		0	0	0	0	0
	0	40	641	873	430		0	213	609	686	627		0	0	0	0	0
	0	40	641	873	430		0	213	609	686	627		0	0	0	0	0
	0	40	641	873	430		0	213	609	686	627		0	0	0	0	0
	0	40	641	873	430		0	213	609	686	627		0	0	0	0	0
	0	40	641	873	430		0	213	609	686	627		0	0	0	0	0
	0	40	641	873	430		0	213	609	686	627		0	0	0	0	0
	0	40	641	873	430		0	213	609	686	627		0	0	0	0	0
	0	40	641	873	430		0	213	609	686	627		0	0	0	0	0
	0	40	641	873	430		0	213	609	686	627		0	0	0	0	0
	0	40	641	873	430		0	213	609	686	627		0	0	0	0	0
	0	40	641	873	430		0	213	609	686	627		0	0	0	0	0
	0	40	641	873	430		0	213	609	686	627		0	0	0	0	0
	0	40	641	873	430		0	213	609	686	627		0	0	0	0	0
	0	40	641	873	430		0	213	609	686	627		0	0	0	0	0
	0	40	641	873	430		0	213	609	686	627		0	0	0	0	0
	0	40	641	873	430		0	213	609	686	627		0	0	0	0	0
	0	40	641	873	430		0	213	609	686	627		0	0	0	0	0
	0	40	641	873	430		0	213	609	686	627		0	0	0	0	0
	0	40	641	873	430		0	213	609	686	627		0	0	0	0	0
	0	40	641	873	430		0	213	609	686	627		0	0	0	0	0
	0	40	641	873	430		0	213	609	686	627		0	0	0	0	0
	0	40	641	873	430		0	213	609	686	627		0	0	0	0	0
	0	40	641	873	430		0	213	609	686	627		0	0	0	0	0
	0	40	641	873	430		0	213	609	686	627		0	0	0	0	0
	0	40	641	873	430		0	213	609	686	627		0	0	0	0	0
	0	40	641	873	430		0	213	609	686	627		0	0	0	0	0
	0	40	641	873	430		0	213	609	686	627		0	0	0	0	0
	0	40	641	873	430		0	213	609	686	627		0	0	0	0	0
	0	40	641	873	430		0	213	609	686	627		0	0	0	0	0
	0	40	641	873	430		0	213	609	686	627		0	0	0	0	0
	0	40	641	873	430		0	213	609	686	627		0	0	0	0	0
	0	40	641	873	430		0	213	609	686	627		0	0	0	0	0
	0	40	641	873	430		0	213	609	686	627		0	0	0	0	0
	0	40	641	873	430		0	213	609	686	627		0	0	0	0	0
	0	40	641	873	430		0	213	609	686	627		0	0	0	0	0
	0	40	641	873	430		0	213	609	686	627		0	0	0	0	0
	0	40	641	873	430		0	213	609	686	627		0	0	0	0	0
	0	40	641	873	430		0	213	609	686	627		0	0	0	0	0
	0	40	641	873	430		0	213	609	686	627		0	0	0	0	0
	0	40	641	873	430		0	213	609	686	627		0	0	0	0	0
	0	40	641	873	430		0	213	609	686	627		0	0	0	0	0
	0	40	641	873	430		0	213	609	686	627		0	0	0	0	0
	0	40	641	873	430		0	213	609	686	627		0	0	0	0	0
	0	40	641	873	430		0	213	609	686	627		0	0	0	0	0
	0	40	641	873	430		0	213	609	686	627		0	0	0	0	0
	0	40	641	873	430		0	213	609	686	627		0	0	0	0	0
	0	40	641	873	430		0	213	609	686	627		0	0	0	0	0
	0	40	641	873	430		0	213	609	686	627		0	0	0	0	0
	0	40	641	873	430		0	213	609	686	627		0	0	0	0	0
	0	40	641	873	430		0	213	609	686	627		0	0	0	0	0
	0	40	641	873	430		0	213	609	686	627		0	0	0	0	0
	0	40	641	873	430		0	213	609	686	627		0	0	0	0	0
	0	40	641	873	430		0	213	609	686	627		0	0	0	0	0
	0	40	641	873	430		0	213	609	686	627		0	0	0	0	0
	0	40	641	873	430		0	213	609	686	627		0	0	0	0	0
	0	40	641	873	430		0	213	609	686	627		0	0	0	0	0
	0	40	641	873	430		0	213	609	686	627		0	0	0	0	0
	0	40	641	873	430		0	213	609	686	627		0	0	0	0	0
	0	40	641	873	430		0	213	609	686	627		0	0	0	0	0
	0	40	641	873	430		0	213	609	686	627		0	0	0	0	0
	0	40	641	873	430		0	213	609	686	627		0	0	0	0	0
	0	40	641	873	430		0	213	609	686	627		0	0	0	0	0
	0	40	641	873	430		0	213	609	686	627		0	0	0	0	0
	0	40	641	873	430		0	213	609	686	627		0	0	0	0	0
	0	40	641	873	430		0	213	609	686	627		0	0	0	0	0
	0	40	641	873	430		0	213	609	686	627		0	0	0	0	0
	0	40	641	873	430		0	213	609	686	627		0	0	0	0	0
	0	40	641	873	430		0	213	609	686	627		0	0	0	0	0
	0	40	641	873	430		0	213	609	686	627		0	0	0	0	0
	0	40	641	873	430		0	213	609	686	627		0	0	0	0	0
	0	40	641	873	430		0	213	609	686	627		0	0	0	0	0
	0	40	641	873	430		0	213	609	686	627		0	0	0	0	0
	0	40	641	873	430		0	213	609	686	627		0	0	0	0	0
	0	40	641	873	430		0	213	609	686	627		0	0	0	0	0
	0	40	641	873	430		0	213	609	686	627		0	0	0	0	0
	0	40	641	873	430		0	213	609	686	627		0	0	0	0	0
	0	40	641	873	430		0	213	609	686	627		0	0	0	0	0
	0	40	641	873	430		0	213	609	686	627		0	0	0	0	0
	0	40	641	873	430		0	213	609	686	627		0	0	0	0	0
	0	40	641	873	430		0	213	609	686	627		0	0	0	0	0
	0	40	641	873	430		0	213	609	686	627		0	0	0	0	0
	0	40	641	873	430		0	213	609	686	627		0	0	0	0	0
	0	40	641	873	430		0	213	609	686	627		0	0	0	0	0
	0	40	641	873	430		0	213	609	686	627		0	0	0	0	0
	0	40	641	873	430		0	213	609	686	627		0	0	0	0	0
	0	40	641	873	430		0	213	609	686	627		0	0	0	0	0
	0	40	641	873	430		0	213	609	686	627		0	0	0	0	0
	0	40	641	873	430		0	213	609	686	627		0	0	0	0	0
	0	40	641	562	598		0	213	609	686	627		0	0	0	0	0
	0	40	641	561	601		0	213	609	686	627		0	0	0	0	0
	0	40	641	558	606		0	213	609	686	627		0	0	0	0	0
	0	40	641	554	611		0	213	609	686	627		0	0	0	0	0
	0	40	641	551	616		0	213	609	686	627		0	0	0	0	0
	0	40	641	548	620		0	213	609	686	627		0	0	0	0	0
	0	40	641	544	622		0	213	609	686	627		0	0	0	0	0
	0	40	641	540	627		0	213	609	686	627		0	0	0	0	0
	0	40	641	540	627		1	213	609	686	627		0	0	0	0	0
	0	40	641	535	630		1	213	609	686	627		0	0	0	0	0
	0	40	641	520	637		1	213	609	686	627		0	0	0	0	0
	0	40	641	510	641		1	213	609	686	627		0	0	0	0	0
	0	40	641	510	641		1	213	609	686	627		0	0	0	0	0
	0	40	641	510	641		1	213	609	686	627		0	0	0	0	0
	0	40	641	510	641		1	213	609	686	627		0	0	0	0	0
	0	40	641	510	641		1	213	609	686	627		0	0	0	0	0
	0	40	641	510	641		1	213	609	686	627		0	0	0	0	0
	0	40	641	510	641		1	213	609	686	627		0	0	0	0	0
	0	40	641	510	641		1	213	609	686	627		0	0	0	0	0
	0	40	641	510	641		1	213	609	686	627		0	0	0	0	0
	0	40	641	510	641		1	213	609	686	627		0	0	0	0	0
	0	40	641	510	641		1	213	609	686	627		0	0	0	0	0
	0	40	641	510	641		1	213	609	686	627		0	0	0	0	0
	0	40	641	510	641		1	213	609	686	627		0	0	0	0	0
	0	40	641	510	641		1	213	609	686	627		0	0	0	0	0
	0	40	641	510	641		1	213	609	686	627		0	0	0	0	0
	0	40	641	510	641		1	213	609	686	627		0	0	0	0	0
	0	40	641	510	641		1	213	609	686	627		0	0	0	0	0
	0	40	641	510	641		1	213	609	686	627		0	0	0	0	0
	0	40	641	510	641		1	213	609	686	627		0	0	0	0	0
	0	40	641	510	641		1	213	609	686	627		0	0	0	0	0
	0	40	641	510	641		1	213	609	686	627		0	0	0	0	0
	0	40	641	510	641		1	213	609	686	627		0	0	0	0	0
	0	40	641	510	641		1	213	609	686	627		0	0	0	0	0
	0	40	641	510	641		1	213	609	686	627		0	0	0	0	0
	0	40	641	510	641		1	213	609	686	627		0	0	0	0	0
	0	40	641	510	641		1	213	609	686	627		0	0	0	0	0
	0	40	641	510	641		1	213	609	686	627		0	0	0	0	0
	0	40	641	510	641		1	213	609	686	627		0	0	0	0	0
	0	40	641	510	641		1	213	609	686	627		0	0	0	0	0
	0	40	641	510	641		1	213	609	686	627		0	0	0	0	0
	0	40	641	510	641		1	213	609	686	627		0	0	0	0	0
	0	40	641	510	641		1	213	609	686	627		0	0	0	0	0
	0	40	641	510	641		1	213	609	686	627		0	0	0	0	0
	0	40	641	510	641		1	213	609	686	627		0	0	0	0	0
	0	40	641	510	641		1	213	609	686	627		0	0	0	0	0
	0	40	641	510	641		1	213	609	686	627		0	0	0	0	0
	0	40	641	510	641		1	213	609	686	627		0	0	0	0	0
	0	40	641	510	641		1	213	609	686	627		0	0	0	0	0
	0	40	641	510	641		1	213	609	686	627		0	0	0	0	0
	0	40	641	510	641		1	213	609	686	627		0	0	0	0	0
	0	40	641	510	641		1	213	609	686	627		0	0	0	0	0
	0	40	641	510	641		1	213	609	686	627		0	0	0	0	0
	0	40	641	510	641		1	213	609	686	627		0	0	0	0	0
	0	40	641	510	641		1	213	609	686	627		0	0	0	0	0
	0	40	641	510	641		1	213	609	686	627		0	0	0	0	0
	0	40	641	510	641		1	213	609	686	627		0	0	0	0	0
	0	40	641	510	641		1	213	609	686	627		0	0	0	0	0
	0	40	641	510	641		1	213	609	686	627		0	0	0	0	0
	0	40	641	510	641		1	213	609	686	627		0	0	0	0	0
	0	40	641	510	641		1	213	609	686	627		0	0	0	0	0
	0	40	641	510	641		1	213	609	686	627		0	0	0	0	0
	0	40	641	510	641		1	213	609	686	627		0	0	0	0	0
	0	40	641	510	641		1	213	609	686	627		0	0	0	0	0
	0	40	641	510	641		1	213	609	686	627		0	0	0	0	0
	0	40	641	510	641		1	213	609	686	627		0	0	0	0	0
	0	40	641	510	641		1	213	609	686	627		0	0	0	0	0
	0	40	641	510	641		1	213	609	686	627		0	0	0	0	0
	0	40	641	510	641		1	213	609	686	627		0	0	0	0	0
	0	40	641	510	641		1	213	609	686	627		0	0	0	0	0
	0	40	641	510	641		1	213	609	686	627		0	0	0	0	0
	0	40	641	510	641		1	213	609	686	627		0	0	0	0	0
	0	40	641	510	641		1	213	609	686	627		0	0	0	0	0
	0	40	641	510	641		1	213	609	686	627		0	0	0	0	0
	0	40	641	510	641		1	213	609	686	627		0	0	0	0	0
	0	40	641	510	641		1	213	609	686	627		0	0	0	0	0
	0	40	641	510	641		1	213	609	686	627		0	0	0	0	0
	0	40	641	510	641		1	213	609	686	627		0	0	0	0	0
	0	40	641	510	641		1	213	609	686	627		0	0	0	0	0
	0	40	641	510	641		1	213	609	686	627		0	0	0	0	0
	0	40	641	510	641		1	213	609	686	627		0	0	0	0	0
	0	40	641	510	641		1	213	609	686	627		0	0	0	0	0
	0	40	641	510	641		1	213	609	686	627		0	0	0	0	0
	0	40	641	510	641		1	213	609	686	627		0	0	0	0	0
	0	40	641	510	641		1	213	609	686	627		0	0	0	0	0
	0	40	641	510	641		1	213	609	686	627		0	0	0	0	0
	0	40	641	510	641		1	213	609	686	627		0	0	0	0	0
	0	40	641	510	641		1	213	609	686	627		0	0	0	0	0
	0	40	641	510	641		1	213	609	686	627		0	0	0	0	0
	0	40	641	510	641		1	213	609	686	627		0	0	0	0	0
	0	40	641	510	641		1	213	609	686	627		0	0	0	0	0
	0	40	641	510	641		1	213	609	686	627		0	0	0	0	0
	0	40	641	510	641		1	213	609	686	627		0	0	0	0	0
	0	40	641	510	641		1	213	609	686	627		0	0	0	0	0
	0	40	641	510	641		1	213	609	686	627		0	0	0	0	0
	0	40	641	510	641		1	213	609	686	627		0	0	0	0	0
	0	40	641	510	641		1	213	609	686	627		0	0	0	0	0
	0	40	641	510	641		1	213	609	686	627		0	0	0	0	0
	0	40	641	510	641		1	213	609	686	627		0	0	0	0	0
	0	40	641	510	641		1	213	609	686	627		0	0	0	0	0
	0	40	641	510	641		1	213	609	686	627		0	0	0	0	0
	0	40	641	510	641		1	213	609	686	627		0	0	0	0	0
	0	40	641	510	641		1	213	609	686	627		0	0	0	0	0
	0	40	641	510	641		1	213	609	686	627		0	0	0	0	0
	0	40	641	510	641		1	213	609	686	627		0	0	0	0	0
	0	40	641	510	641		1	213	609	686	627		0	0	0	0	0
	0	40	641	510	641		1	213	609	686	627		0	0	0	0	0
	0	40	641	510	641		1	213	609	686	627		0	0	0	0	0
	0	40	641	510	641		1	213	609	686	627		0	0	0	0	0
	0	40	641	510	641		1	213	609	686	627		0	0	0	0	0
	0	40	641	510	641		1	213	609	686	627		0	0	0	0	0
	0	40	641	510	641		1	213	609	686	627		0	0	0	0	0
	0	40	641	510	641		1	213	609	686	627		0	0	0	0	0
	0	40	641	510	641		1	213	609	686	627		0	0	0	0	0
	0	40	641	510	641		1	213	609	686	627		0	0	0	0	0
	0	40	641	510	641		1	213	609	686	627		0	0	0	0	0
	0	40	641	510	641		1	213	609	686	627		0	0	0	0	0
	0	40	641	510	641		1	213	609	686	627		0	0	0	0	0
	0	40	641	510	641		1	213	609	686	627		0	0	0	0	0
	0	40	641	510	641		1	213	609	686	627		0	0	0	0	0
	0	40	641	510	641		0	213	609	686	627		0	0	0	0	0
	0	40	641	514	638		0	213	609	686	627		0	0	0	0	0
	0	40	641	519	634		0	213	609	686	627		0	0	0	0	0
	0	40	641	512	642		0	213	609	686	627		0	0	0	0	0
	0	40	641	512	642		0	213	609	686	627		0	0	0	0	0
	0	40	641	512	642		0	213	609	686	627		0	0	0	0	0
	0	40	641	512	642		0	213	609	686	627		0	0	0	0	0
	0	40	641	512	642		0	213	609	686	627		0	0	0	0	0
	0	40	641	512	642		0	213	609	686	627		0	0	0	0	0
	0	40	641	512	642		0	213	609	686	627		0	0	0	0	0
	0	40	641	512	642		0	213	609	686	627		0	0	0	0	0
	0	40	641	512	642		0	213	609	686	627		0	0	0	0	0
	0	40	641	512	642		0	213	609	686	627		0	0	0	0	0
	0	40	641	510	642		0	213	609	686	627		0	0	0	0	0
	0	40	641	511	638		0	213	609	686	627		0	0	0	0	0
	0	40	641	512	637		0	213	609	686	627		0	0	0	0	0
	0	40	641	512	635		0	213	609	686	627		0	0	0	0	0
	0	40	641	512	635		0	213	609	686	627		0	0	0	0	0
	0	40	641	512	632		0	213	609	686	627		0	0	0	0	0
	0	40	641	512	626		0	213	609	686	627		0	0	0	0	0
	0	40	641	512	622		0	213	609	686	627		0	0	0	0	0
	0	40	641	511	619		0	213	609	686	627		0	0	0	0	0
	0	40	641	510	616		0	213	609	686	627		0	0	0	0	0
	0	40	641	509	615		0	213	609	686	627		0	0	0	0	0
	0	40	641	505	613		0	213	609	686	627		0	0	0	0	0
	0	40	641	505	613		0	213	609	686	627		0	0	0	0	0
	0	40	641	502	613		0	213	609	686	627		0	0	0	0	0
	0	40	641	496	616		0	213	609	686	627		0	0	0	0	0
	0	40	641	496	616		0	213	609	686	627		0	0	0	0	0
	0	40	641	495	618		0	213	609	686	627		0	0	0	0	0
	0	40	641	486	627		0	213	609	686	627		0	0	0	0	0
	0	40	641	482	633		0	213	609	686	627		0	0	0	0	0
	0	40	641	479	640		0	213	609	686	627		0	0	0	0	0
	0	40	641	479	640		0	213	609	686	627		0	0	0	0	0
	0	40	641	479	640		0	213	609	686	627		0	0	0	0	0
	0	40	641	479	640		0	213	609	686	627		0	0	0	0	0
	0	40	641	479	640		0	213	609	686	627		0	0	0	0	0
	0	40	641	479	640		0	213	609	686	627		0	0	0	0	0
	0	40	641	479	640		0	213	609	686	627		0	0	0	0	0
	0	40	641	479	640		0	213	609	686	627		0	0	0	0	0
	0	40	641	479	640		0	213	609	686	627		0	0	0	0	0
	0	40	641	479	640		0	213	609	686	627		0	0	0	0	0
	0	40	641	479	640		0	213	609	686	627		0	0	0	0	0
	0	40	641	479	640		0	213	609	686	627		0	0	0	0	0
	0	40	641	479	640		0	213	609	686	627		0	0	0	0	0
	0	40	641	479	640		0	213	609	686	627		0	0	0	0	0
	0	40	641	479	640		0	213	609	686	627		0	0	0	0	0
	0	40	641	479	640		0	213	609	686	627		0	0	0	0	0
	0	40	641	479	640		0	213	609	686	627		0	0	0	0	0
	0	40	641	479	640		0	213	609	686	627		0	0	0	0	0
	0	40	641	479	640		0	213	609	686	627		0	0	0	0	0
	0	40	641	479	640		0	213	609	686	627		0	0	0	0	0
	0	40	641	479	640		0	213	609	686	627		0	0	0	0	0
	0	40	641	479	640		0	213	609	686	627		0	0	0	0	0
	0	40	641	479	640		0	213	609	686	627		0	0	0	0	0
	0	40	641	479	640		0	213	609	686	627		0	0	0	0	0
	0	40	641	479	640		0	213	609	686	627		0	0	0	0	0
	0	40	641	479	640		0	213	609	686	627		0	0	0	0	0
	0	40	641	479	640		0	213	609	686	627		0	0	0	0	0
	0	40	641	479	640		0	213	609	686	627		0	0	0	0	0
	0	40	641	479	640		0	213	609	686	627		0	0	0	0	0
	0	40	641	479	640		0	213	609	686	627		0	0	0	0	0
	0	40	641	479	640		0	213	609	686	627		0	0	0	0	0
	0	40	641	479	640		0	213	609	686	627		0	0	0	0	0
	0	40	641	479	640		0	213	609	686	627		0	0	0	0	0
	0	40	641	479	640		0	213	609	686	627		0	0	0	0	0
	0	40	641	479	640		0	213	609	686	627		0	0	0	0	0
	0	40	641	479	640		0	213	609	686	627		0	0	0	0	0
	0	40	641	479	640		0	213	609	686	627		0	0	0	0	0
	0	40	641	479	640		0	213	609	686	627		0	0	0	0	0
	0	40	641	479	640		0	213	609	686	627		0	0	0	0	0
	0	40	641	479	640		0	213	609	686	627		0	0	0	0	0
	0	40	641	479	640		0	213	609	686	627		0	0	0	0	0
	0	40	641	479	640		0	213	609	686	627		0	0	0	0	0
	0	40	641	479	640		0	213	609	686	627		0	0	0	0	0
	0	40	641	479	640		0	213	609	686	627		0	0	0	0	0
	0	40	641	479	640		0	213	609	686	627		0	0	0	0	0
	0	40	641	479	640		0	213	609	686	627		0	274	546	0	0
	0	40	641	479	640		0	213	609	686	627		0	278	544	0	0
	0	40	641	479	640		0	213	609	686	627		0	279	546	0	0
	0	40	641	479	640		0	213	609	686	627		0	281	546	0	0
	0	40	641	479	640		0	213	609	686	627		0	282	546	0	0
	0	40	641	479	640		0	213	609	686	627		0	283	547	0	0
	0	40	641	479	640		0	213	609	686	627		0	284	547	0	0
	0	40	641	479	640		0	213	609	686	627		0	284	547	0	0
	0	40	641	479	640		0	213	609	686	627		0	284	547	0	0
	0	40	641	479	640		0	213	609	686	627		0	284	547	0	0
	0	40	641	479	640		0	213	609	686	627		0	283	546	0	0
	0	40	641	479	640		0	213	609	686	627		0	283	546	0	0
	0	40	641	479	640		0	213	609	686	627		0	283	546	0	0
	0	40	641	479	640		0	213	609	686	627		0	283	546	0	0
	0	40	641	479	640		0	213	609	686	627		0	283	546	0	0
	0	40	641	479	640		0	213	609	686	627		0	283	546	0	0
	0	40	641	479	640		0	213	609	686	627		0	283	546	0	0
	0	40	641	479	640		0	213	609	686	627		0	283	546	0	0
	0	40	641	479	640		0	213	609	686	627		0	283	546	0	0
	0	40	641	479	640		0	213	609	686	627		0	283	546	0	0
	0	40	641	479	640		0	213	609	686	627		0	283	546	0	0
	0	40	641	479	640		0	213	609	686	627		0	283	546	0	0
	0	40	641	479	640		0	213	609	686	627		0	283	546	0	0
	0	40	641	479	640		0	213	609	686	627		0	283	546	0	0
	0	40	641	479	640		0	213	609	686	627		0	283	546	0	0
	0	40	641	479	640		0	213	609	686	627		0	283	546	0	0
	0	40	641	479	640		0	213	609	686	627		0	283	546	0	0
	0	40	641	479	640		0	213	609	686	627		0	283	546	0	0
	0	40	641	479	640		0	213	609	686	627		0	283	546	0	0
	0	40	641	479	640		0	213	609	686	627		0	283	546	0	0
	0	40	641	479	640		0	213	609	686	627		0	283	546	0	0
	0	40	641	479	640		0	213	609	686	627		0	283	546	0	0
	0	40	641	479	640		0	213	609	686	627		0	283	546	0	0
	0	40	641	479	640		0	213	609	686	627		0	283	546	0	0
	0	40	641	479	640		0	213	609	686	627		0	283	546	0	0
	0	40	641	479	640		0	213	609	686	627		0	283	546	0	0
	0	40	641	479	640		0	213	609	686	627		0	283	546	0	0
	0	40	641	479	640		0	213	609	686	627		0	283	546	0	0
	0	40	641	479	640		0	213	609	686	627		0	283	546	0	0
	0	40	641	479	640		0	213	609	686	627		0	283	546	0	0
	0	40	641	479	640		0	213	609	686	627		0	283	546	0	0
	0	40	641	479	640		0	213	609	686	627		0	283	546	0	0
	0	40	641	479	640		0	213	609	686	627		0	283	546	0	0
	0	40	641	479	640		0	213	609	686	627		0	283	546	0	0
	0	40	641	479	640		0	213	609	686	627		0	283	546	0	0
	0	40	641	479	640		0	213	609	686	627		0	283	546	0	0
	0	40	641	479	640		0	213	609	686	627		0	283	546	0	0
	0	40	641	479	640		0	213	609	686	627		0	283	546	0	0
	0	40	641	479	640		0	213	609	686	627		0	283	546	0	0
	0	40	641	479	640		0	213	609	686	627		0	283	546	0	0
	0	40	641	479	640		0	213	609	686	627		0	283	546	0	0
	0	40	641	479	640		0	213	609	686	627		0	283	546	0	0
	0	40	641	479	640		0	213	609	686	627		0	283	546	0	0
	0	40	641	479	640		0	213	609	686	627		0	283	546	0	0
	0	40	641	479	640		0	213	609	686	627		0	283	546	0	0
	0	40	641	479	640		0	213	609	686	627		0	283	546	0	0
	0	40	641	479	640		0	213	609	686	627		0	283	546	0	0
	0	40	641	479	640		0	213	609	686	627		0	283	546	0	0
	0	40	641	479	640		0	213	609	686	627		0	283	546	0	0
	0	40	641	479	640		0	213	609	686	627		0	283	546	0	0
	0	40	641	479	640		0	213	609	686	627		0	283	546	0	0
	0	40	641	479	640		0	213	609	686	627		0	283	546	0	0
	0	40	641	479	640		0	213	609	686	627		0	283	546	0	0
	0	40	641	479	640		0	213	609	686	627		0	283	546	0	0
	0	40	641	479	640		0	213	609	686	627		0	283	546	0	0
	0	40	641	479	640		0	213	609	686	627		0	283	546	0	0
	0	40	641	479	640		0	213	609	686	627		0	283	546	0	0
	0	40	641	479	640		0	213	609	686	627		0	283	546	0	0
	0	40	641	479	640		0	213	609	686	627		0	283	546	0	0
	0	40	641	479	640		0	213	609	686	627		0	283	546	0	0
	0	40	641	479	640		0	213	609	686	627		0	283	546	0	0
	0	40	641	479	640		0	213	609	686	627		0	283	546	0	0
	0	40	641	479	640		0	213	609	686	627		0	283	546	0	0
	0	40	641	479	640		0	213	609	686	627		0	283	546	0	0
	0	40	641	479	640		0	213	609	686	627		0	283	546	0	0
	0	40	641	479	640		0	213	609	686	627		0	283	546	0	0
	0	40	641	479	640		0	213	609	686	627		0	283	546	0	0
	0	40	641	479	640		0	213	609	686	627		0	283	546	0	0
	0	40	641	479	640		0	213	609	686	627		0	283	546	0	0
	0	40	641	479	640		0	213	609	686	627		0	283	546	0	0
	0	40	641	479	640		0	213	609	686	627		0	283	546	0	0
	0	40	641	479	640		0	213	609	686	627		0	283	546	0	0
	0	40	641	479	640		0	213	609	686	627		0	283	546	0	0
	0	40	641	479	640		0	213	609	686	627		0	283	546	0	0
	0	40	641	479	640		0	213	609	686	627		0	283	546	0	0
	0	40	641	479	640		0	213	609	686	627		0	283	546	0	0
	0	40	641	479	640		0	213	609	686	627		0	283	546	0	0
	0	40	641	479	640		0	213	609	686	627		0	283	546	0	0
	0	40	641	479	640		0	213	609	686	627		0	283	546	0	0
	0	40	641	479	640		0	213	609	686	627		0	283	546	0	0
	0	40	641	479	640		0	213	609	686	627		0	283	546	0	0
	0	40	641	479	640		0	213	609	686	627		0	283	546	0	0
	0	40	641	479	640		0	213	609	686	627		0	283	546	0	0
	0	40	641	479	640		0	213	609	686	627		0	283	546	0	0
	0	40	641	479	640		0	213	609	686	627		0	283	546	0	0
	0	40	641	479	640		0	213	609	686	627		0	283	546	0	0
	0	40	641	479	640		0	213	609	686	627		0	283	546	0	0
	0	40	641	479	640		0	213	609	686	627		0	283	546	0	0
	0	40	641	479	640		0	213	609	686	627		0	283	546	0	0
	0	40	641	479	640		0	213	609	686	627		0	283	546	0	0
	0	40	641	479	640		0	213	609	686	627		0	283	546	0	0
	0	40	641	479	640		0	213	609	686	627		0	283	546	0	0
	0	40	641	479	640		0	213	609	686	627		0	283	546	0	0
	0	40	641	479	640		0	213	609	686	627		0	283	546	0	0
	0	40	641	479	640		0	213	609	686	627		0	283	546	0	0
	0	40	641	479	640		0	213	609	686	627		0	283	546	0	0
	0	40	641	479	640		0	213	609	686	627		0	283	546	0	0
	0	40	641	479	640		0	213	609	686	627		0	283	546	0	0
	0	40	641	479	640		0	213	609	686	627		0	283	546	0	0
	0	40	641	479	640		0	213	609	686	627		0	283	546	0	0
	0	40	641	479	640		0	213	609	686	627		0	283	546	0	0
	0	40	641	479	640		0	213	609	686	627		0	283	546	0	0
	0	40	641	479	640		0	213	609	686	627		0	283	546	0	0
	0	40	641	479	640		0	213	609	686	627		0	283	546	0	0
	0	40	641	479	640		0	213	609	686	627		0	283	546	0	0
	0	40	641	479	640		0	213	609	686	627		0	283	546	0	0
	0	40	641	479	640		0	213	609	686	627		0	283	546	0	0
	0	40	641	479	640		0	213	609	686	627		0	283	546	0	0
	0	40	641	479	640		0	213	609	686	627		0	283	546	0	0
	0	40	641	479	640		0	213	609	686	627		0	283	546	0	0
	0	40	641	479	640		0	213	609	686	627		0	283	546	0	0
	0	40	641	479	640		0	213	609	686	627		0	283	546	0	0
	0	40	641	479	640		0	213	609	686	627		0	283	546	0	0
	0	40	641	479	640		0	213	609	686	627		0	283	546	0	0
	0	40	641	479	640		0	213	609	686	627		0	283	546	0	0
	0	40	641	479	640		0	213	609	686	627		0	283	546	0	0
	0	40	641	479	640		0	213	609	686	627		0	283	546	0	0
	0	40	641	479	640		0	213	609	686	627		0	283	546	0	0
	0	40	641	479	640		0	213	609	686	627		0	283	546	0	0
	0	40	641	479	640		0	213	609	686	627		0	283	546	0	0
	0	40	641	479	640		0	213	609	686	627		0	283	546	0	0
	0	40	641	479	640		0	213	609	686	627		0	283	546	0	0
	0	40	641	479	640		0	213	609	686	627		0	283	546	0	0
	0	40	641	479	640		0	213	609	686	627		0	283	546	0	0
	0	40	641	479	640		0	213	609	686	627		0	283	546	0	0
	0	40	641	479	640		0	213	609	686	627		0	283	546	0	0
	0	40	641	479	640		0	213	609	686	627		0	283	546	0	0
	0	40	641	479	640		0	213	609	686	627		0	283	546	0	0
	0	40	641	479	640		0	213	609	686	627		0	283	546	0	0
	0	40	641	479	640		0	213	609	686	627		0	283	546	0	0
	0	40	641	479	640		0	213	609	686	627		0	283	546	0	0
	0	40	641	479	640		0	213	609	686	627		0	283	546	806	505
	0	40	641	479	640		0	213	609	686	627		0	283	546	806	505
	0	40	641	479	640		0	213	609	686	627		0	283	546	806	505
	0	40	641	479	640		0	213	609	686	627		0	283	546	806	505
	0	40	641	479	640		0	213	609	686	627		0	283	546	806	505
	0	40	641	479	640		0	213	609	686	627		0	283	546	806	505
	0	40	641	479	640		0	213	609	686	627		0	283	546	806	505
	0	40	641	479	640		0	213	609	686	627		0	283	546	806	505
	0	40	641	479	640		0	213	609	686	627		0	283	546	806	505
	0	40	641	479	640		0	213	609	686	627		0	283	546	806	505
	0	40	641	479	640		0	213	609	686	627		0	283	546	806	505
	0	40	641	479	640		0	213	609	686	627		0	283	546	806	505
	0	40	641	479	640		0	213	609	686	627		0	283	546	806	505
	0	40	641	479	640		0	213	609	686	627		0	283	546	806	505
	0	40	641	479	640		0	213	609	686	627		0	283	546	806	505
	0	40	641	479	640		0	213	609	686	627		0	283	546	806	505
	0	40	641	479	640		0	213	609	686	627		0	283	546	806	505
	0	40	641	479	640		0	213	609	686	627		0	283	546	806	505
	0	40	641	479	640		0	213	609	686	627		0	283	546	806	505
	0	40	641	479	640		0	213	609	686	627		0	283	546	806	505
	0	40	641	479	640		0	213	609	686	627		0	283	546	806	505
	0	40	641	479	640		0	213	609	686	627		0	283	546	806	505
	0	40	641	479	640		0	213	609	686	627		0	283	546	806	505
	0	40	641	479	640		0	213	609	686	627		0	283	546	806	505
	0	40	641	479	640		0	213	609	686	627		0	283	546	806	505
	0	40	641	479	640		0	213	609	686	627		0	283	546	806	505
	0	40	641	479	640		0	213	609	686	627		0	283	546	806	505
	0	40	641	479	640		0	213	609	686	627		0	283	546	806	505
	0	40	641	479	640		0	213	609	686	627		0	283	546	806	505
	0	40	641	479	640		0	213	609	686	627		0	283	546	806	505
	0	40	641	479	640		0	213	609	686	627		0	283	546	806	505
	0	40	641	479	640		0	213	609	686	627		0	283	546	806	505
	0	40	641	479	640		0	213	609	686	627		0	283	546	806	505
	0	40	641	479	640		0	213	609	686	627		0	283	546	806	505
	0	40	641	479	640		0	213	609	686	627		0	283	546	806	505
	0	40	641	479	640		0	213	609	686	627		0	283	546	806	505
	0	40	641	479	640		0	213	609	686	627		0	283	546	806	505
	0	40	641	479	640		0	213	609	686	627		0	283	546	806	505
	0	40	641	479	640		0	213	609	686	627		0	283	546	806	505
	0	40	641	479	640		0	213	609	686	627		0	283	546	806	505
	0	40	641	479	640		0	213	609	686	627		0	283	546	806	505
	0	40	641	479	640		0	213	609	686	627		0	283	546	806	505
	0	40	641	479	640		0	213	609	686	627		0	283	546	806	505
	0	40	641	479	640		0	213	609	686	627		0	283	546	806	505
	0	40	641	479	640		0	213	609	686	627		0	283	546	806	505
	0	40	641	479	640		0	213	609	686	627		0	283	546	806	505
	0	40	641	479	640		0	213	609	686	627		0	283	546	806	505
	0	40	641	479	640		0	213	609	686	627		0	283	546	806	505
	0	40	641	479	640		0	213	609	686	627		0	283	546	806	505
	0	40	641	479	640		0	213	609	686	627		0	283	546	806	505
	0	40	641	479	640		0	213	609	686	627		0	283	546	806	505
	0	40	641	479	640		0	213	609	686	627		0	283	546	806	505
	0	40	641	479	640		0	213	609	686	627		0	283	546	806	505
	0	40	641	479	640		0	213	609	686	627		0	283	546	806	505
	0	40	641	479	640		0	213	609	686	627		0	283	546	806	505
	0	40	641	479	640		0	213	609	686	627		0	283	546	806	505
	0	40	641	479	640		0	213	609	686	627		0	283	546	806	505
	0	40	641	479	640		0	213	609	686	627		0	283	546	806	505
	0	40	641	479	640		0	213	609	686	627		0	283	546	806	505
	0	40	641	479	640		0	213	609	686	627		0	283	546	806	505
	0	40	641	479	640		0	213	609	686	627		0	283	546	806	505
	0	40	641	479	640		0	213	609	686	627		0	283	546	806	505
	0	40	641	479	640		0	213	609	686	627		0	283	546	806	505
	0	40	641	479	640		0	213	609	686	627		0	283	546	806	505
	0	40	641	479	640		0	213	609	686	627		0	283	546	806	505
	0	40	641	479	640		0	213	609	686	627		0	283	546	806	505
	0	40	641	479	640		0	213	609	686	627		0	283	546	806	505
	0	40	641	479	640		0	213	609	686	627		0	283	546	806	505
	0	40	641	479	640		0	213	609	686	627		0	283	546	806	505
	0	40	641	479	640		0	213	609	686	627		0	283	546	806	505
	0	40	641	479	640		0	213	609	686	627		0	283	546	806	505
	0	40	641	479	640		0	213	609	686	627		0	283	546	806	505
	0	40	641	479	640		0	213	609	686	627		0	283	546	806	505
	0	40	641	479	640		0	213	609	686	627		0	283	546	806	505
	0	40	641	479	640		0	213	609	686	627		0	283	546	806	505
	0	40	641	479	640		0	213	609	686	627		0	283	546	806	505
	0	40	641	479	640		0	213	609	686	627		0	283	546	806	505
	0	40	641	479	640		0	213	609	686	627		0	283	546	806	505
	0	40	641	479	640		0	213	609	686	627		0	283	546	806	505
	0	40	641	479	640		0	213	609	686	627		0	283	546	806	505
	0	40	641	479	640		0	213	609	686	627		0	283	546	806	505
	0	40	641	479	640		0	213	609	686	627		0	283	546	806	505
	0	40	641	479	640		0	213	609	686	627		0	283	546	806	505
	0	40	641	479	640		0	213	609	686	627		0	283	546	806	505
	0	40	641	479	640		0	213	609	686	627		0	283	546	806	505
	0	40	641	479	640		0	213	609	686	627		0	283	546	806	505
	0	40	641	479	640		0	213	609	686	627		0	283	546	806	505
	0	40	641	479	640		0	213	609	686	627		0	283	546	806	505
	0	40	641	479	640		0	213	609	686	627		0	283	546	806	505
	0	40	641	479	640		0	213	609	686	627		0	283	546	806	505
	0	40	641	479	640		0	213	609	686	627		0	283	546	806	505
	0	40	641	479	640		0	213	609	686	627		0	283	546	806	505
	0	40	641	479	640		0	213	609	686	627		0	283	546	806	505
	0	40	641	479	640		0	213	609	686	627		0	283	546	806	505
	0	40	641	479	640		0	213	609	686	627		0	283	546	806	505
	0	40	641	479	640		0	213	609	686	627		0	283	546	806	505
	0	40	641	479	640		0	213	609	686	627		0	283	546	806	505
	0	40	641	479	640		0	213	609	686	627		0	283	546	806	505
	1	40	641	479	640		0	213	609	686	627		0	283	546	806	505
	1	40	641	479	640		0	213	609	686	627		0	283	546	806	505
	1	40	641	479	640		0	213	609	686	627		0	283	546	806	505
	1	40	641	479	640		0	213	609	686	627		0	283	546	806	505
	1	40	641	479	640		0	213	609	686	627		0	283	546	806	505
	1	40	641	479	640		0	213	609	686	627		0	283	546	806	505
	1	40	641	479	640		0	213	609	686	627		0	283	546	806	505
	1	40	641	479	640		0	213	609	686	627		0	283	546	806	505
	1	40	641	479	640		0	213	609	686	627		0	283	546	806	505
	1	40	641	479	640		0	213	609	686	627		0	283	546	806	505
	1	40	641	479	640		0	213	609	686	627		0	283	546	806	505
	1	40	641	479	640		0	213	609	686	627		0	283	546	806	505
	1	40	641	479	640		0	213	609	686	627		0	283	546	806	505
	1	40	641	479	640		0	213	609	686	627		0	283	546	806	505
	1	40	641	479	640		0	213	609	686	627		0	283	546	806	505
	1	40	641	479	640		0	213	609	686	627		0	283	546	806	505
	1	40	641	479	640		0	213	609	686	627		0	283	546	806	505
	1	40	641	479	640		0	213	609	686	627		0	283	546	806	505
	1	40	641	479	640		0	213	609	686	627		0	283	546	806	505
	1	40	641	479	640		0	213	609	686	627		0	283	546	806	505
	1	40	641	479	640		0	213	609	686	627		0	283	546	806	505
	1	40	641	479	640		0	213	609	686	627		0	283	546	806	505
	1	40	641	479	640		0	213	609	686	627		0	283	546	806	505
	1	40	641	479	640		0	213	609	686	627		0	283	546	806	505
	1	40	641	479	640		0	213	609	686	627		0	283	546	806	505
	1	40	641	479	640		0	213	609	686	627		0	283	546	806	505
	1	40	641	479	640		0	213	609	686	627		0	283	546	806	505
	1	40	641	479	640		0	213	609	686	627		0	283	546	806	505
	1	40	641	479	640		0	213	609	686	627		0	283	546	806	505
	1	40	641	479	640		0	213	609	686	627		0	283	546	806	505
	1	40	641	479	640		0	213	609	686	627		0	283	546	806	505
	1	40	641	479	640		0	213	609	686	627		0	283	546	806	505
	1	40	641	479	640		0	213	609	686	627		0	283	546	806	505
	1	40	641	479	640		0	213	609	686	627		0	283	546	806	505
	1	40	641	479	640		0	213	609	686	627		0	283	546	806	505
	1	40	641	479	640		0	213	609	686	627		0	283	546	806	505
	1	40	641	479	640		0	213	609	686	627		0	283	546	806	505
	1	40	641	479	640		0	213	609	686	627		0	283	546	806	505
	1	40	641	479	640		0	213	609	686	627		0	283	546	806	505
	1	40	641	479	640		0	213	609	686	627		0	283	546	806	505
	1	40	641	479	640		0	213	609	686	627		0	283	546	806	505
	1	40	641	479	640		0	213	609	686	627		0	283	546	806	505
	1	40	641	479	640		0	213	609	686	627		0	283	546	806	505
	1	40	641	479	640		0	213	609	686	627		0	283	546	806	505
	1	40	641	479	640		0	213	609	686	627		0	283	546	806	505
	1	40	641	479	640		0	213	609	686	627		0	283	546	806	505
	1	40	641	479	640		0	213	609	686	627		0	283	546	806	505
	1	40	641	479	640		0	213	609	686	627		0	283	546	806	505
	1	40	641	479	640		0	213	609	686	627		0	283	546	806	505
	1	40	641	479	640		0	213	609	686	627		0	283	546	806	505
	1	40	641	479	640		0	213	609	686	627		0	283	546	806	505
	1	40	641	479	640		0	213	609	686	627		0	283	546	806	505
	1	40	641	479	640		0	213	609	686	627		0	283	546	806	505
	1	40	641	479	640		0	213	609	686	627		0	283	546	806	505
	1	40	641	479	640		0	213	609	686	627		0	283	546	806	505
	1	40	641	479	640		0	213	609	686	627		0	283	546	806	505
	1	40	641	479	640		0	213	609	686	627		0	283	546	806	505
	1	40	641	479	640		0	213	609	686	627		0	283	546	806	505
	1	40	641	479	640		0	213	609	686	627		0	283	546	806	505
	1	40	641	479	640		0	213	609	686	627		0	283	546	806	505
	1	40	641	479	640		0	213	609	686	627		0	283	546	806	505
	1	40	641	479	640		0	213	609	686	627		0	283	546	806	505
	1	40	641	479	640		0	213	609	686	627		0	283	546	806	505
	1	40	641	479	640		0	213	609	686	627		0	283	546	806	505
	1	40	641	479	640		0	213	609	686	627		0	283	546	806	505
	1	40	641	479	640		0	213	609	686	627		0	283	546	806	505
	1	40	641	479	640		0	213	609	686	627		0	283	546	806	505
	1	40	641	479	640		0	213	609	686	627		0	283	546	806	505
	1	40	641	479	640		0	213	609	686	627		0	283	546	806	505
	1	40	641	479	640		0	213	609	686	627		0	283	546	806	505
	1	40	641	479	640		0	213	609	686	627		0	283	546	806	505
	1	40	641	479	640		0	213	609	686	627		0	283	546	806	505
	1	40	641	479	640		0	213	609	686	627		0	283	546	806	505
	1	40	641	479	640		0	213	609	686	627		0	283	546	806	505
	1	40	641	479	640		0	213	609	686	627		0	283	546	806	505
	1	40	641	479	640		0	213	609	686	627		0	283	546	806	505
	1	40	641	479	640		0	213	609	686	627		0	283	546	806	505
	1	40	641	479	640		0	213	609	686	627		0	283	546	806	505
	1	40	641	479	640		0	213	609	686	627		0	283	546	806	505
	1	40	641	479	640		0	213	609	686	627		0	283	546	806	505
	1	40	641	479	640		0	213	609	686	627		0	283	546	806	505
	1	40	641	479	640		0	213	609	686	627		0	283	546	806	505
	1	40	641	479	640		0	213	609	686	627		0	283	546	806	505
	1	40	641	479	640		0	213	609	686	627		0	283	546	806	505
	1	40	641	479	640		0	213	609	686	627		0	283	546	806	505
	1	40	641	479	640		0	213	609	686	627		0	283	546	806	505
	1	40	641	479	640		0	213	609	686	627		0	283	546	806	505
	1	40	641	479	640		0	213	609	686	627		0	283	546	806	505
	1	40	641	479	640		0	213	609	686	627		0	283	546	806	505
	1	40	641	479	640		0	213	609	686	627		0	283	546	806	505
	1	40	641	479	640		0	213	609	686	627		0	283	546	806	505
	1	40	641	479	640		0	213	609	686	627		0	283	546	806	505
	1	40	641	479	640		0	213	609	686	627		0	283	546	806	505
	1	40	641	479	640		0	213	609	686	627		0	283	546	806	505
	1	40	641	479	640		0	213	609	686	627		0	283	546	806	505
	1	40	641	479	640		0	213	609	686	627		0	283	546	806	505
	1	40	641	479	640		0	213	609	686	627		0	283	546	806	505
	1	40	641	479	640		0	213	609	686	627		0	283	546	806	505
	1	40	641	479	640		0	213	609	686	627		0	283	546	806	505
	1	40	641	479	640		0	213	609	686	627		0	283	546	806	505
	1	40	641	479	640		0	213	609	686	627		0	283	546	806	505
	1	40	641	479	640		0	213	609	686	627		0	283	546	806	505
	1	40	641	479	640		0	213	609	686	627		0	283	546	806	505
	1	40	641	479	640		0	213	609	686	627		0	283	546	806	505
	1	40	641	479	640		0	213	609	686	627		0	283	546	806	505
	1	40	641	479	640		0	213	609	686	627		0	283	546	806	505
	1	40	641	479	640		0	213	609	686	627		0	283	546	806	505
	1	40	641	479	640		0	213	609	686	627		0	283	546	806	505
	1	40	641	479	640		0	213	609	686	627		0	283	546	806	505
	1	40	641	479	640		1	213	609	686	627		0	283	546	806	505
	1	40	641	479	640		1	213	609	686	627		0	283	546	806	505
	1	40	641	479	640		1	213	609	686	627		0	283	546	806	505
	1	40	641	479	640		1	213	609	686	627		0	283	546	806	505
	1	40	641	479	640		1	213	609	686	627		0	283	546	806	505
	0	40	641	479	640		1	213	609	686	627		0	283	546	806	505
	0	40	641	479	640		1	213	609	686	627		0	283	546	806	505
	0	40	641	479	640		1	213	609	686	627		0	283	546	806	505
	0	40	641	479	640		1	213	609	686	627		0	283	546	806	505
	0	40	641	479	640		1	213	609	686	627		0	283	546	806	505
	0	40	641	479	640		1	213	609	686	627		0	283	546	806	505
	0	40	641	479	640		1	213	609	686	627		0	283	546	806	505
	0	40	641	479	640		1	213	609	686	627		0	283	546	806	505
	0	40	641	479	640		1	213	609	686	627		0	283	546	806	505
	0	40	641	479	640		1	213	609	686	627		0	283	546	806	505
	0	40	641	479	640		1	213	609	686	627		0	283	546	806	505
	0	40	641	479	640		1	213	609	686	627		0	283	546	806	505
	0	40	641	479	640		1	213	609	686	627		0	283	546	806	505
	0	40	641	479	640		1	213	609	686	627		0	283	546	806	505
	0	40	641	479	640		1	213	609	686	627		0	283	546	806	505
	0	40	641	479	640		1	213	609	686	627		0	283	546	806	505
	0	40	641	479	640		1	213	609	686	627		0	283	546	806	505
	0	40	641	479	640		1	213	609	686	627		0	283	546	806	505
	0	40	641	479	640		1	213	609	686	627		0	283	546	806	505
	0	40	641	479	640		1	213	609	686	627		0	283	546	806	505
	0	40	641	479	640		1	213	609	686	627		0	283	546	806	505
	0	40	641	479	640		1	213	609	686	627		0	283	546	806	505
	0	40	641	479	640		1	213	609	686	627		0	283	546	806	505
	0	40	641	479	640		1	213	609	686	627		0	283	546	806	505
	0	40	641	479	640		1	213	609	686	627		0	283	546	806	505
	0	40	641	479	640		1	213	609	686	627		0	283	546	806	505
	0	40	641	479	640		1	213	609	686	627		0	283	546	806	505
	0	40	641	479	640		1	213	609	686	627		0	283	546	806	505
	0	40	641	479	640		1	213	609	686	627		0	283	546	806	505
	0	40	641	479	640		1	213	609	686	627		0	283	546	806	505
	0	40	641	479	640		1	213	609	686	627		0	283	546	806	505
	0	40	641	479	640		1	213	609	686	627		0	283	546	806	505
	0	40	641	479	640		1	213	609	686	627		0	283	546	806	505
	0	40	641	479	640		1	213	609	686	627		0	283	546	806	505
	0	40	641	479	640		1	213	609	686	627		0	283	546	806	505
	0	40	641	479	640		1	213	609	686	627		0	283	546	806	505
	0	40	641	479	640		1	213	609	686	627		0	283	546	806	505
	0	40	641	479	640		1	213	609	686	627		0	283	546	806	505
	0	40	641	479	640		1	213	609	686	627		0	283	546	806	505
	0	40	641	479	640		1	213	609	686	627		0	283	546	806	505
	0	40	641	479	640		1	213	609	686	627		0	283	546	806	505
	0	40	641	479	640		1	213	609	686	627		0	283	546	806	505
	0	40	641	479	640		1	213	609	686	627		0	283	546	806	505
	0	40	641	479	640		1	213	609	686	627		0	283	546	806	505
	0	40	641	479	640		1	213	609	686	627		0	283	546	806	505
	0	40	641	479	640		1	213	609	686	627		0	283	546	806	505
	0	40	641	479	640		1	213	609	686	627		0	283	546	806	505
	0	40	641	479	640		1	213	609	686	627		0	283	546	806	505
	0	40	641	479	640		1	213	609	686	627		0	283	546	806	505
	0	40	641	479	640		1	213	609	686	627		0	283	546	806	505
	0	40	641	479	640		1	213	609	686	627		0	283	546	806	505
	0	40	641	479	640		1	213	609	686	627		0	283	546	806	505
	0	40	641	479	640		1	213	609	686	627		0	283	546	806	505
	0	40	641	479	640		1	213	609	686	627		0	283	546	806	505
	0	40	641	479	640		1	213	609	686	627		0	283	546	806	505
	0	40	641	479	640		1	213	609	686	627		0	283	546	806	505
	0	40	641	479	640		1	213	609	686	627		0	283	546	806	505
	0	40	641	479	640		1	213	609	686	627		0	283	546	806	505
	0	40	641	479	640		1	213	609	686	627		0	283	546	806	505
	0	40	641	479	640		1	213	609	686	627		0	283	546	806	505
	0	40	641	479	640		1	213	609	686	627		0	283	546	806	505
	0	40	641	479	640		1	213	609	686	627		1	283	546	806	505
	0	40	641	479	640		1	213	609	686	627		1	283	546	806	505
	0	40	641	479	640		1	213	609	686	627		1	283	546	806	505
	0	40	641	479	640		1	213	609	686	627		1	283	546	806	505
	0	40	641	479	640		1	213	609	686	627		1	283	546	806	505
	0	40	641	479	640		1	213	609	686	627		1	283	546	806	505
	0	40	641	479	640		1	213	609	686	627		1	283	546	806	505
	0	40	641	479	640		1	213	609	686	627		1	283	546	806	505
	0	40	641	479	640		1	213	609	686	627		1	283	546	806	505
	0	40	641	479	640		1	213	609	686	627		1	283	546	806	505
	0	40	641	479	640		1	213	609	686	627		1	283	546	806	505
	0	40	641	479	640		1	213	609	686	627		1	283	546	806	505
	0	40	641	479	640		1	213	609	686	627		1	283	546	806	505
	0	40	641	479	640		1	213	609	686	627		1	283	546	806	505
	0	40	641	479	640		1	213	609	686	627		1	283	546	806	505
	0	40	641	479	640		1	213	609	686	627		1	283	546	806	505
	0	40	641	479	640		1	213	609	686	627		1	283	546	806	505
	0	40	641	479	640		1	213	609	686	627		1	283	546	806	505
	0	40	641	479	640		1	213	609	686	627		1	283	546	806	505
	0	40	641	479	640		1	213	609	686	627		1	283	546	806	505
	0	40	641	479	640		1	213	609	686	627		1	283	546	806	505
	0	40	641	479	640		1	213	609	686	627		1	283	546	806	505
	0	40	641	479	640		1	213	609	686	627		1	283	546	806	505
	0	40	641	479	640		1	213	609	686	627		1	283	546	806	505
	0	40	641	479	640		1	213	609	686	627		1	283	546	806	505
	0	40	641	479	640		1	213	609	686	627		1	283	546	806	505
	0	40	641	479	640		1	213	609	686	627		1	283	546	806	505
	0	40	641	479	640		1	213	609	686	627		1	283	546	806	505
	0	40	641	479	640		1	213	609	686	627		1	283	546	806	505
	0	40	641	479	640		1	213	609	686	627		1	283	546	806	505
	0	40	641	479	640		1	213	609	686	627		1	283	546	806	505
	0	40	641	479	640		1	213	609	686	627		1	283	546	806	505
	0	40	641	479	640		1	213	609	686	627		1	283	546	806	505
	0	40	641	479	640		1	213	609	686	627		1	283	546	806	505
	0	40	641	479	640		1	213	609	686	627		1	283	546	806	505
	0	40	641	479	640		1	213	609	686	627		1	283	546	806	505
	0	40	641	479	640		1	213	609	686	627		1	283	546	806	505
	0	40	641	479	640		1	213	609	686	627		1	283	546	806	505
	0	40	641	479	640		1	213	609	686	627		1	283	546	806	505
	0	40	641	479	640		1	213	609	686	627		1	283	546	806	505
	0	40	641	479	640		1	213	609	686	627		1	283	546	806	505
	0	40	641	479	640		1	213	609	686	627		1	283	546	806	505
	0	40	641	479	640		1	213	609	686	627		1	283	546	806	505
	0	40	641	479	640		0	213	609	686	627		1	283	546	806	505
	0	40	641	479	640		0	213	609	686	627		1	283	546	806	505
	0	40	641	479	640		0	213	609	686	627		1	283	546	806	505
	0	40	641	479	640		0	213	609	686	627		1	283	546	806	505
	0	40	641	843	637		0	213	609	686	627		1	283	546	806	505
	0	40	641	843	637		0	213	609	686	627		1	283	546	806	505
	0	40	641	843	637		0	213	609	686	627		1	283	546	806	505
	0	40	641	843	637		0	213	609	686	627		1	283	546	806	505
	0	40	641	843	637		0	213	609	686	627		1	283	546	806	505
	0	40	641	852	638		0	213	609	686	627		1	283	546	806	505
	0	40	641	858	630		0	213	609	686	627		1	283	546	806	505
	0	40	641	858	630		0	213	609	686	627		1	283	546	806	505
	0	40	641	860	629		0	213	609	686	627		1	283	546	806	505
	0	40	641	860	629		0	213	609	686	627		1	283	546	806	505
	0	40	641	860	629		0	213	609	686	627		1	283	546	806	505
	0	40	641	860	629		0	213	609	686	627		1	283	546	806	505
	0	40	641	860	629		0	213	609	686	627		1	283	546	806	505
	0	40	641	860	629		0	213	609	686	627		1	283	546	806	505
	0	40	641	860	629		0	213	609	686	627		1	283	546	806	505
	0	40	641	860	629		0	213	609	686	627		1	283	546	806	505
	0	40	641	860	629		0	213	609	686	627		1	283	546	806	505
	0	40	641	860	629		0	213	609	686	627		1	283	546	806	505
	0	40	641	860	629		0	213	609	686	627		1	283	546	806	505
	0	40	641	860	629		0	213	609	686	627		1	283	546	806	505
	0	40	641	860	629		0	213	609	686	627		1	283	546	806	505
	0	40	641	860	629		0	213	609	686	627		1	283	546	806	505
	0	40	641	860	629		0	213	609	686	627		1	283	546	806	505
	0	40	641	860	629		0	213	609	686	627		1	283	546	806	505
	0	40	641	860	629		0	213	609	686	627		1	283	546	806	505
	0	40	641	860	629		0	213	609	686	627		1	283	546	806	505
	0	40	641	860	629		0	213	609	686	627		1	283	546	806	505
	0	40	641	860	629		0	213	609	686	627		1	283	546	806	505
	0	40	641	860	629		0	213	609	686	627		1	283	546	806	505
	0	40	641	860	629		0	213	609	686	627		1	283	546	806	505
	0	40	641	860	629		0	213	609	686	627		1	283	546	806	505
	0	40	641	860	629		0	213	609	686	627		1	283	546	806	505
	0	40	641	860	629		0	213	609	686	627		1	283	546	806	505
	0	40	641	860	629		0	213	609	686	627		1	283	546	806	505
	0	40	641	860	629		0	213	609	686	627		1	283	546	806	505
	0	40	641	860	629		0	213	609	686	627		1	283	546	806	505
	0	40	641	860	629		0	213	609	686	627		1	283	546	806	505
	0	40	641	860	629		0	213	609	686	627		1	283	546	806	505
	0	40	641	860	629		0	213	609	686	627		1	283	546	806	505
	0	40	641	860	629		0	213	609	686	627		1	283	546	806	505
	0	40	641	860	629		0	213	609	686	627		1	283	546	806	505
	0	40	641	860	629		0	213	609	686	627		1	283	546	806	505
	0	40	641	860	629		0	213	609	686	627		1	283	546	806	505
	0	40	641	860	629		0	213	609	686	627		1	283	546	806	505
	0	40	641	860	629		0	213	609	686	627		1	283	546	806	505
	0	40	641	860	629		0	213	609	686	627		1	283	546	806	505
	0	40	641	860	629		0	213	609	686	627		1	283	546	806	505
	0	40	641	860	629		0	213	609	686	627		1	283	546	806	505
	0	40	641	860	629		0	213	609	686	627		1	283	546	806	505
	0	40	641	860	629		0	213	609	686	627		1	283	546	806	505
	0	40	641	860	629		0	213	609	686	627		1	283	546	806	505
	0	40	641	860	629		0	213	609	686	627		1	283	546	806	505
	0	40	641	860	629		0	213	609	686	627		1	283	546	806	505
	0	40	641	860	629		0	213	609	686	627		1	283	546	806	505
	0	40	641	860	629		0	213	609	686	627		1	283	546	806	505
	0	40	641	860	629		0	213	609	686	627		1	283	546	806	505
	0	40	641	860	629		0	213	609	686	627		1	283	546	806	505
	0	40	641	860	629		0	213	609	686	627		1	283	546	806	505
	0	40	641	860	629		0	213	609	686	627		1	283	546	806	505
	0	40	641	860	629		0	213	609	686	627		1	283	546	806	505
	0	40	641	860	629		0	213	609	686	627		1	283	546	806	505
	0	40	641	860	629		0	213	609	686	627		1	283	546	806	505
	0	40	641	860	629		0	213	609	686	627		1	283	546	806	505
	0	40	641	860	629		0	213	609	686	627		1	283	546	806	505
	0	40	641	860	629		0	213	609	686	627		1	283	546	806	505
	0	40	641	860	629		0	213	609	686	627		1	283	546	806	505
	0	40	641	860	629		0	213	609	686	627		1	283	546	806	505
	0	40	641	860	629		0	213	609	686	627		1	283	546	806	505
	0	40	641	860	629		0	213	609	686	627		1	283	546	806	505
	0	40	641	860	629		0	213	609	686	627		1	283	546	806	505
	0	40	641	860	629		0	213	609	686	627		1	283	546	806	505
	0	40	641	860	629		0	213	609	686	627		1	283	546	806	505
	0	40	641	860	629		0	213	609	686	627		1	283	546	806	505
	0	40	641	860	629		0	213	609	686	627		1	283	546	806	505
	0	40	641	860	629		0	213	609	686	627		1	283	546	806	505
	0	40	641	860	629		0	213	609	686	627		1	283	546	806	505
	0	40	641	860	629		0	213	609	686	627		1	283	546	806	505
	0	40	641	860	629		0	213	609	686	627		1	283	546	806	505
	0	40	641	860	629		0	213	609	686	627		1	283	546	806	505
	0	40	641	860	629		0	213	609	686	627		1	283	546	806	505
	0	40	641	860	629		0	213	609	686	627		1	283	546	806	505
	0	40	641	860	629		0	213	609	686	627		1	283	546	806	505
	0	40	641	860	629		0	213	609	686	627		1	283	546	806	505
	0	40	641	860	629		0	213	609	686	627		1	283	546	806	505
	0	40	641	860	629		0	213	609	686	627		1	283	546	806	505
	0	40	641	860	629		0	213	609	686	627		1	283	546	806	505
	0	40	641	860	629		0	213	609	686	627		1	283	546	806	505
	0	40	641	860	629		0	213	609	686	627		1	283	546	806	505
	0	40	641	860	629		0	213	609	686	627		1	283	546	806	505
	0	40	641	860	629		0	213	609	686	627		1	283	546	806	505
	0	40	641	860	629		0	213	609	686	627		1	283	546	806	505
	0	40	641	860	629		0	213	609	686	627		1	283	546	806	505
	0	40	641	860	629		0	213	609	686	627		1	283	546	806	505
	0	40	641	860	629		0	213	609	686	627		1	283	546	806	505
	0	40	641	860	629		0	213	609	686	627		1	283	546	806	505
	0	40	641	860	629		0	213	609	686	627		1	283	546	806	505
	0	40	641	860	629		0	213	609	686	627		1	283	546	806	505
	0	40	641	860	629		0	213	609	686	627		1	283	546	806	505
	0	40	641	860	629		0	213	609	686	627		1	283	546	806	505
	0	40	641	860	629		0	213	609	686	627		1	283	546	806	505
	0	40	641	860	629		0	213	609	686	627		1	283	546	806	505
	0	40	641	860	629		0	213	609	686	627		1	283	546	806	505
	0	40	641	860	629		0	213	609	686	627		1	283	546	806	505
	0	40	641	860	629		0	213	609	686	627		1	283	546	806	505
	0	40	641	860	629		0	213	609	686	627		1	283	546	806	505
	0	40	641	860	629		0	213	609	686	627		1	283	546	806	505
	0	40	641	860	629		0	213	609	686	627		1	283	546	806	505
	0	40	641	860	629		0	213	609	686	627		1	283	546	806	505
	0	40	641	860	629		0	213	609	686	627		1	283	546	806	505
	0	40	641	860	629		0	213	609	686	627		1	283	546	806	505
	0	40	641	860	629		0	213	609	686	627		1	283	546	806	505
	0	40	641	860	629		0	213	609	686	627		1	283	546	806	505
	0	40	641	860	629		0	213	609	686	627		1	283	546	806	505
	0	40	641	860	629		0	213	609	686	627		1	283	546	806	505
	0	40	641	860	629		0	213	609	686	627		1	283	546	806	505
	0	40	641	860	629		0	213	609	686	627		1	283	546	806	505
	0	40	641	860	629		0	213	609	686	627		1	283	546	806	505
	0	40	641	860	629		0	213	609	686	627		1	283	546	806	505
	0	40	641	860	629		0	213	609	686	627		1	283	546	806	505
	0	40	641	860	629		0	213	609	686	627		1	283	546	806	505
	0	40	641	860	629		0	213	609	686	627		1	283	546	806	505
	0	40	641	860	629		0	213	609	686	627		1	283	546	806	505
	0	40	641	860	629		0	213	609	686	627		1	283	546	806	505
	0	40	641	860	629		0	213	609	686	627		1	283	546	806	505
	0	40	641	860	629		0	213	609	686	627		1	283	546	806	505
	0	40	641	860	629		0	213	609	686	627		1	283	546	806	505
	0	40	641	860	629		0	213	609	686	627		1	283	546	806	505
	0	40	641	860	629		0	213	609	686	627		1	283	546	806	505
	0	40	641	860	629		0	213	609	686	627		1	283	546	806	505
	0	40	641	860	629		0	213	609	686	627		1	283	546	806	505
	0	40	641	860	629		0	213	609	686	627		1	283	546	806	505
	0	40	641	860	629		0	213	609	686	627		1	283	546	806	505
	0	40	641	860	629		0	213	609	686	627		1	283	546	806	505
	0	40	641	860	629		0	213	609	686	627		1	283	546	806	505
	0	40	641	860	629		0	213	609	686	627		1	283	546	806	505
	0	40	641	860	629		0	213	609	686	627		0	283	546	806	505
	0	40	641	860	629		0	213	609	686	627		0	283	546	806	505
	0	40	641	860	629		0	213	609	686	627		0	283	546	806	505
	0	40	641	860	629		0	213	609	686	627		0	283	546	806	505
	0	40	641	860	629		0	213	609	686	627		0	283	546	806	505
	0	40	641	860	629		0	213	609	686	627		0	283	546	806	505
	0	40	641	860	629		0	213	609	686	627		0	283	546	806	505
	0	40	641	860	629		0	213	609	686	627		0	283	546	806	505
	0	40	641	860	629		0	213	609	686	627		0	283	546	806	505
	0	40	641	860	629		0	213	609	686	627		0	283	546	806	505
	0	40	641	860	629		0	213	609	686	627		0	283	546	806	505
	0	40	641	860	629		0	213	609	686	627		0	283	546	806	505
	0	40	641	860	629		0	213	609	686	627		0	283	546	806	505
	0	40	641	860	629		0	213	609	686	627		0	283	546	806	505
	0	40	641	860	629		0	213	609	686	627		0	283	546	806	505
	0	40	641	860	629		0	213	609	686	627		0	283	546	806	505
	0	40	641	860	629		0	213	609	686	627		0	283	546	806	505
	0	40	641	860	629		0	213	609	686	627		0	283	546	806	505
	0	40	641	860	629		0	213	609	686	627		0	283	546	806	505
	0	40	641	860	629		0	213	609	686	627		0	283	546	806	505
	0	40	641	860	629		0	213	609	686	627		0	283	546	806	505
	0	40	641	860	629		0	213	609	686	627		0	283	546	806	505
	0	40	641	860	629		0	213	609	686	627		0	283	546	806	505
	0	40	641	860	629		0	213	609	686	627		0	283	546	806	505
	0	40	641	860	629		0	213	609	686	627		0	283	546	806	505
	0	40	641	860	629		0	213	609	686	627		0	283	546	806	505
	0	40	641	860	629		0	213	609	686	627		0	283	546	806	505
	0	40	641	860	629		0	213	609	686	627		0	283	546	806	505
	0	40	641	860	629		0	213	609	686	627		0	283	546	806	505
	0	40	641	860	629		0	213	609	686	627		0	283	546	806	505
	0	40	641	860	629		0	213	609	686	627		0	283	546	806	505
	0	40	641	860	629		0	213	609	686	627		0	283	546	806	505
	0	40	641	860	629		0	213	609	686	627		0	283	546	806	505
	0	40	641	860	629		0	213	609	686	627		0	283	546	806	505
	0	40	641	860	629		0	213	609	686	627		0	283	546	806	505
	0	40	641	860	629		0	213	609	686	627		0	283	546	806	505
	0	40	641	860	629		0	213	609	686	627		0	283	546	806	505
	0	40	641	860	629		0	213	609	686	627		0	283	546	806	505
	0	40	641	860	629		0	213	609	686	627		0	283	546	806	505
	0	40	641	860	629		0	213	609	686	627		0	283	546	806	505
	0	40	641	860	629		0	213	609	686	627		0	283	546	806	505
	0	40	641	860	629		0	213	609	686	627		0	283	546	806	505
	0	40	641	860	629		0	213	609	686	627		0	283	546	806	505
	0	40	641	860	629		0	213	609	686	627		0	283	546	806	505
	0	40	641	860	629		0	213	609	686	627		0	283	546	806	505
	0	40	641	860	629		0	213	609	686	627		0	283	546	806	505
	0	40	641	860	629		0	213	609	686	627		0	283	546	806	505
	0	40	641	860	629		0	213	609	686	627		0	283	546	806	505
	0	40	641	860	629		0	213	609	686	627		0	283	546	806	505
	0	40	641	860	629		0	213	609	686	627		0	283	546	806	505
	0	40	641	860	629		0	213	609	686	627		0	283	546	806	505
	0	40	641	860	629		0	213	609	686	627		0	283	546	806	505
	0	40	641	860	629		0	213	609	686	627		0	283	546	806	505
	0	40	641	860	629		0	213	609	686	627		0	283	546	806	505
	0	40	641	860	629		0	213	609	686	627		0	304	562	806	505
	0	40	641	860	629		0	213	609	686	627		0	311	567	806	505
	0	40	641	860	629		0	213	609	686	627		0	315	570	806	505
	0	40	641	860	629		0	213	609	686	627		0	320	574	806	505
	0	40	641	860	629		0	213	609	686	627		0	324	580	806	505
	0	40	641	860	629		0	213	609	686	627		0	328	584	806	505
	0	40	641	860	629		0	213	609	686	627		0	332	588	806	505
	0	40	641	860	629		0	213	609	686	627		0	336	596	806	505
	0	40	641	860	629		0	213	609	686	627		0	338	602	806	505
	0	40	641	860	629		0	213	609	686	627		0	339	603	806	505
	0	40	641	860	629		0	213	609	686	627		0	342	612	806	505
	0	40	641	860	629		0	213	609	686	627		0	344	617	806	505
	0	40	641	860	629		0	213	609	686	627		0	347	621	806	505
	0	40	641	860	629		0	213	609	686	627		0	349	623	806	505
	0	40	641	860	629		0	213	609	686	627		0	351	627	806	505
	0	40	641	860	629		0	213	609	686	627		0	356	632	806	505
	0	40	641	860	629		0	213	609	686	627		0	358	633	806	505
	0	40	641	860	629		0	213	609	686	627		0	361	636	806	505
	0	40	641	860	629		0	213	609	686	627		0	364	638	806	505
	0	40	641	860	629		0	213	609	686	627		0	366	641	806	505
	0	40	641	860	629		0	213	609	686	627		0	369	645	806	505
	0	40	641	860	629		0	213	609	686	627		0	371	647	806	505
	0	40	641	860	629		0	213	609	686	627		0	373	649	806	505
	0	40	641	860	629		0	213	609	686	627		0	375	653	806	505
	0	40	641	860	629		0	213	609	686	627		0	377	655	806	505
	0	40	641	860	629		0	213	609	686	627		0	379	657	806	505
	0	40	641	860	629		0	213	609	686	627		0	382	661	806	505
	0	40	641	860	629		0	213	609	686	627		0	386	664	806	505
	0	40	641	860	629		0	213	609	686	627		0	388	666	806	505
	0	40	641	860	629		0	213	609	686	627		0	389	668	806	505
	0	40	641	860	629		0	213	609	686	627		0	393	671	806	505
	0	40	641	860	629		0	213	609	686	627		0	394	672	806	505
	0	40	641	860	629		0	213	609	686	627		0	396	675	806	505
	0	40	641	860	629		0	213	609	686	627		0	398	678	806	505
	0	40	641	860	629		0	213	609	686	627		0	400	679	806	505
	0	40	641	860	629		0	213	609	686	627		0	400	683	806	505
	0	40	641	860	629		0	213	609	686	627		0	400	685	806	505
	0	40	641	860	629		0	213	609	686	627		0	400	686	806	505
	0	40	641	860	629		0	213	609	686	627		0	400	686	806	505
	0	40	641	860	629		0	213	609	686	627		0	400	686	806	505
	0	40	641	860	629		0	213	609	686	627		0	400	686	806	505
	0	40	641	860	629		0	213	609	686	627		0	400	686	806	505
	0	40	641	860	629		0	213	609	686	627		0	400	686	806	505
	0	40	641	860	629		0	213	609	686	627		0	400	686	806	505
	0	40	641	860	629		0	213	609	686	627		0	400	686	806	505
	0	40	641	860	629		0	213	609	686	627		0	400	686	806	505
	0	40	641	860	629		0	213	609	686	627		0	400	686	806	505
	0	40	641	860	629		0	213	609	686	627		0	400	686	806	505
	0	40	641	860	629		0	213	609	686	627		0	400	686	806	505
	0	40	641	860	629		0	213	609	686	627		0	400	686	806	505
	0	40	641	860	629		0	213	609	686	627		0	400	686	806	505
	0	40	641	860	629		0	213	609	686	627		0	400	686	806	505
	0	40	641	860	629		0	213	609	686	627		0	400	686	806	505
	0	40	641	860	629		0	213	609	686	627		0	400	686	806	505
	0	40	641	860	629		0	213	609	686	627		0	400	686	806	505
	0	40	641	860	629		0	213	609	686	627		0	400	686	806	505
	0	40	641	860	629		0	213	609	686	627		0	400	686	806	505
	0	40	641	860	629		0	213	609	686	627		0	400	686	806	505
	0	40	641	860	629		0	213	609	686	627		0	400	686	806	505
	0	40	641	860	629		0	179	412	686	627		0	400	686	806	505
	0	40	641	860	629		0	179	408	686	627		0	400	686	806	505
	0	40	641	860	629		0	178	402	686	627		0	400	686	806	505
	0	40	641	860	629		0	178	402	686	627		0	400	686	806	505
	0	40	641	860	629		0	177	401	686	627		0	400	686	806	505
	0	40	641	860	629		0	175	404	686	627		0	400	686	806	505
	0	40	641	860	629		0	174	411	686	627		0	400	686	806	505
	0	40	641	860	629		0	174	411	686	627		0	400	686	806	505
	0	40	641	860	629		0	174	411	686	627		0	400	686	806	505
	0	40	641	860	629		0	174	411	686	627		0	400	686	806	505
	0	40	641	860	629		0	174	411	686	627		0	400	686	806	505
	0	40	641	860	629		0	174	411	686	627		0	400	686	806	505
	0	40	641	860	629		0	174	411	686	627		0	400	686	806	505
	0	40	641	860	629		0	174	411	686	627		0	400	686	806	505
	0	40	641	860	629		0	174	411	686	627		0	400	686	806	505
	0	40	641	860	629		0	174	411	686	627		0	400	686	806	505
	0	40	641	860	629		0	174	411	686	627		0	400	686	806	505
	0	40	641	860	629		0	174	411	686	627		0	400	686	806	505
	0	40	641	860	629		0	174	411	686	627		0	400	686	806	505
	0	40	641	860	629		0	174	411	686	627		0	400	686	806	505
	0	40	641	860	629		0	174	411	686	627		0	400	686	806	505
	0	40	641	860	629		0	174	411	686	627		0	400	686	806	505
	0	40	641	860	629		0	174	411	686	627		0	400	686	806	505
	0	40	641	860	629		0	174	411	686	627		0	400	686	806	505
	0	40	641	860	629		0	174	411	686	627		0	400	686	806	505
	0	40	641	860	629		0	174	411	686	627		0	400	686	806	505
	0	40	641	860	629		0	174	411	686	627		0	400	686	806	505
	0	40	641	860	629		0	174	411	686	627		0	400	686	806	505
	0	40	641	860	629		0	174	411	686	627		0	400	686	806	505
	0	40	641	860	629		0	174	411	686	627		0	400	686	806	505
	0	40	641	860	629		0	174	411	686	627		0	400	686	806	505
	0	40	641	860	629		0	174	411	686	627		0	400	686	806	505
	0	40	641	860	629		0	174	411	686	627		0	400	686	806	505
	0	40	641	860	629		0	174	411	686	627		0	400	686	806	505
	0	40	641	860	629		0	174	411	686	627		0	400	686	806	505
	0	40	641	860	629		0	174	411	686	627		0	400	686	806	505
	0	40	641	860	629		0	174	411	686	627		0	400	686	806	505
	0	40	641	860	629		0	174	411	686	627		0	400	686	806	505
	0	40	641	860	629		0	174	411	686	627		0	400	686	806	505
	0	40	641	860	629		0	174	411	686	627		0	400	686	806	505
	0	40	641	860	629		0	174	411	686	627		0	400	686	806	505
	0	40	641	860	629		0	174	411	686	627		0	400	686	806	505
	0	40	641	860	629		0	174	411	686	627		0	400	686	806	505
	0	40	641	860	629		0	174	411	686	627		0	400	686	806	505
	0	40	641	860	629		0	174	411	686	627		0	400	686	806	505
	0	40	641	860	629		0	174	411	686	627		0	400	686	806	505
	0	40	641	860	629		0	174	411	686	627		0	400	686	806	505
	0	40	641	860	629		0	174	411	686	627		0	400	686	806	505
	0	40	641	860	629		0	174	411	686	627		0	400	686	806	505
	0	40	641	860	629		0	174	411	686	627		0	400	686	806	505
	0	40	641	860	629		0	174	411	686	627		0	400	686	806	505
	0	40	641	860	629		0	174	411	686	627		0	400	686	806	505
	0	40	641	860	629		0	174	411	686	627		0	400	686	806	505
	0	40	641	860	629		0	174	411	686	627		0	400	686	806	505
	0	40	641	860	629		0	174	411	686	627		0	400	686	806	505
	0	40	641	860	629		0	174	411	686	627		0	400	686	806	505
	0	40	641	860	629		0	174	411	686	627		0	400	686	806	505
	0	40	641	860	629		0	174	411	686	627		0	400	686	806	505
	0	40	641	860	629		0	174	411	686	627		0	400	686	806	505
	0	40	641	860	629		0	174	411	686	627		0	400	686	806	505
	0	40	641	860	629		0	174	411	686	627		0	400	686	806	505
	0	40	641	860	629		0	174	411	686	627		0	400	686	806	505
	0	40	641	860	629		0	174	411	686	627		0	400	686	806	505
	0	40	641	860	629		0	174	411	686	627		0	400	686	806	505
	0	40	641	860	629		0	174	411	686	627		0	400	686	806	505
	1	40	641	860	629		0	174	411	686	627		0	400	686	806	505
	1	40	641	860	629		0	174	411	686	627		0	400	686	806	505
	1	40	641	860	629		0	174	411	686	627		0	400	686	806	505
	1	40	641	860	629		0	174	411	686	627		0	400	686	806	505
	1	40	641	860	629		0	174	411	686	627		0	400	686	806	505
	1	40	641	860	629		0	174	411	686	627		0	400	686	806	505
	1	40	641	860	629		0	174	411	686	627		0	400	686	806	505
	1	40	641	860	629		0	174	411	686	627		0	400	686	806	505
	1	40	641	860	629		0	174	411	686	627		0	400	686	806	505
	1	40	641	860	629		0	174	411	686	627		0	400	686	806	505
	1	40	641	860	629		0	174	411	686	627		0	400	686	806	505
	1	40	641	860	629		0	174	411	686	627		0	400	686	806	505
	1	40	641	860	629		0	174	411	686	627		0	400	686	806	505
	1	40	641	860	629		0	174	411	686	627		0	400	686	806	505
	1	40	641	860	629		0	174	411	686	627		0	400	686	806	505
	1	40	641	860	629		0	174	411	686	627		0	400	686	806	505
	1	40	641	860	629		0	174	411	686	627		0	400	686	806	505
	1	40	641	860	629		0	174	411	686	627		0	400	686	806	505
	1	40	641	860	629		0	174	411	686	627		0	400	686	806	505
	1	40	641	860	629		0	174	411	686	627		0	400	686	806	505
	1	40	641	860	629		0	174	411	686	627		0	400	686	806	505
	1	40	641	860	629		0	174	411	686	627		0	400	686	806	505
	1	40	641	860	629		0	174	411	686	627		0	400	686	806	505
	1	40	641	860	629		0	174	411	686	627		0	400	686	806	505
	1	40	641	860	629		0	174	411	686	627		0	400	686	806	505
	1	40	641	860	629		0	174	411	686	627		0	400	686	806	505
	1	40	641	860	629		0	174	411	686	627		0	400	686	806	505
	1	40	641	860	629		0	174	411	686	627		0	400	686	806	505
	1	40	641	860	629		0	174	411	686	627		0	400	686	806	505
	1	40	641	860	629		0	174	411	686	627		0	400	686	806	505
	1	40	641	860	629		0	174	411	686	627		0	400	686	806	505
	1	40	641	860	629		0	174	411	686	627		0	400	686	806	505
	1	40	641	860	629		0	174	411	686	627		0	400	686	806	505
	1	40	641	860	629		0	174	411	686	627		0	400	686	806	505
	1	40	641	860	629		0	174	411	686	627		0	400	686	806	505
	1	40	641	860	629		0	174	411	686	627		0	398	709	806	505
	1	40	641	860	629		0	174	411	686	627		0	386	722	806	505
	1	40	641	860	629		0	174	411	686	627		0	375	732	806	505
	1	40	641	860	629		0	174	411	686	627		0	360	747	806	505
	1	40	641	860	629		0	174	411	686	627		0	351	757	806	505
	1	40	641	860	629		0	174	411	686	627		0	341	769	806	505
	1	40	641	860	629		0	174	411	686	627		0	335	777	806	505
	1	40	641	860	629		0	174	411	686	627		0	329	784	806	505
	1	40	641	860	629		0	174	411	686	627		0	325	792	806	505
	1	40	641	860	629		0	174	411	686	627		0	321	797	806	505
	1	40	641	860	629		0	174	411	686	627		0	319	803	806	505
	1	40	641	860	629		0	174	411	686	627		0	318	807	806	505
	1	40	641	860	629		0	174	411	686	627		0	317	810	806	505
	1	40	641	860	629		0	174	411	686	627		0	316	813	806	505
	1	40	641	860	629		0	174	411	686	627		0	315	818	806	505
	1	40	641	860	629		0	174	411	686	627		0	315	824	806	505
	1	40	641	860	629		0	174	411	686	627		0	314	829	806	505
	1	40	641	860	629		0	174	411	686	627		0	314	831	806	505
	1	40	641	860	629		0	174	411	686	627		0	313	835	806	505
	1	40	641	860	629		0	174	411	686	627		0	313	837	806	505
	1	40	641	860	629		0	174	411	686	627		0	313	837	806	505
	1	40	641	860	629		0	174	411	686	627		0	313	837	806	505
	1	40	641	860	629		0	174	411	686	627		0	311	840	806	505
	1	40	641	860	629		0	174	411	686	627		0	311	843	806	505
	1	40	641	860	629		0	174	411	686	627		0	310	844	806	505
	1	40	641	860	629		0	174	411	686	627		0	307	847	806	505
	1	40	641	860	629		0	174	411	686	627		0	305	848	806	505
	1	40	641	860	629		0	174	411	686	627		0	302	850	806	505
	1	40	641	860	629		0	174	411	686	627		0	298	852	806	505
	1	40	641	860	629		0	174	411	686	627		0	295	855	806	505
	1	40	641	860	629		0	174	411	686	627		0	292	857	806	505
	1	40	641	860	629		0	174	411	686	627		0	287	859	806	505
	1	40	641	860	629		0	174	411	686	627		0	284	862	806	505
	1	40	641	860	629		0	174	411	686	627		0	282	863	806	505
	1	40	641	860	629		0	174	411	686	627		0	277	867	806	505
	1	40	641	860	629		0	174	411	686	627		0	275	867	806	505
	1	40	641	860	629		0	174	411	686	627		0	268	871	806	505
	1	40	641	860	629		0	174	411	686	627		0	264	873	806	505
	1	40	641	860	629		0	174	411	686	627		0	261	873	806	505
	1	40	641	860	629		0	174	411	686	627		0	257	874	806	505
	1	40	641	860	629		0	174	411	686	627		0	254	877	806	505
	1	40	641	860	629		0	174	411	686	627		0	251	878	806	505
	1	40	641	860	629		0	174	411	686	627		0	248	878	806	505
	1	40	641	860	629		0	174	411	686	627		0	246	878	806	505
	1	40	641	860	629		0	174	411	686	627		0	244	878	806	505
	1	40	641	860	629		0	174	411	686	627		0	243	880	806	505
	1	40	641	860	629		0	174	411	686	627		0	243	880	806	505
	1	40	641	860	629		0	174	411	686	627		0	243	878	806	505
	1	40	641	860	629		0	174	411	686	627		0	243	878	806	505
	1	40	641	860	629		0	174	411	686	627		0	243	878	806	505
	1	40	641	860	629		0	174	411	686	627		0	245	877	806	505
	1	40	641	860	629		0	174	411	686	627		0	248	874	806	505
	1	40	641	860	629		0	174	411	686	627		0	249	874	806	505
	1	40	641	860	629		0	174	411	686	627		0	251	871	806	505
	1	40	641	860	629		0	174	411	686	627		0	253	870	806	505
	1	40	641	860	629		0	174	411	686	627		0	254	866	806	505
	1	40	641	860	629		0	174	411	686	627		0	254	866	806	505
	1	40	641	860	629		0	174	411	686	627		0	254	866	806	505
	1	40	641	860	629		0	174	411	686	627		0	254	866	806	505
	1	40	641	860	629		0	174	411	686	627		0	254	866	806	505
	1	40	641	860	629		0	174	411	686	627		0	254	866	806	505
	1	40	641	860	629		0	174	411	686	627		0	254	866	806	505
	1	40	641	860	629		0	174	411	686	627		0	254	866	806	505
	1	40	641	860	629		0	174	411	686	627		0	254	866	806	505
	1	40	641	860	629		0	174	411	686	627		0	254	866	806	505
	1	40	641	860	629		0	174	411	686	627		0	254	866	806	505
	1	40	641	860	629		0	174	411	686	627		0	254	866	806	505
	1	40	641	860	629		0	174	411	686	627		0	254	866	806	505
	1	40	641	860	629		0	174	411	686	627		0	254	866	806	505
	1	40	641	860	629		0	174	411	686	627		0	254	866	806	505
	1	40	641	860	629		0	174	411	686	627		0	254	866	806	505
	1	40	641	860	629		0	174	411	686	627		0	254	866	806	505
	1	40	641	860	629		0	174	411	686	627		0	254	866	806	505
	1	40	641	860	629		0	174	411	686	627		0	254	866	806	505
	1	40	641	860	629		1	174	411	686	627		0	254	866	806	505
	1	40	641	860	629		1	174	411	686	627		0	254	866	806	505
	1	40	641	860	629		1	174	411	686	627		0	254	866	806	505
	1	40	641	860	629		1	174	411	686	627		0	254	866	806	505
	1	40	641	860	629		1	174	411	686	627		0	254	866	806	505
	0	40	641	860	629		1	174	411	686	627		0	254	866	806	505
	0	40	641	860	629		1	174	411	686	627		0	254	866	806	505
	0	40	641	860	629		1	174	411	686	627		0	254	866	806	505
	0	40	641	860	629		1	174	411	686	627		0	254	866	806	505
	0	40	641	860	629		1	174	411	686	627		0	254	866	806	505
	0	40	641	860	629		1	174	411	686	627		0	254	866	806	505
	0	40	641	860	629		1	174	411	686	627		0	254	866	806	505
	0	40	641	860	629		1	174	411	686	627		0	254	866	806	505
	0	40	641	860	629		1	174	411	686	627		0	254	866	806	505
	0	40	641	860	629		1	174	411	686	627		0	254	866	806	505
	0	40	641	860	629		1	174	411	686	627		0	254	866	806	505
	0	40	641	860	629		1	174	411	686	627		0	254	866	806	505
	0	40	641	860	629		1	174	411	686	627		0	254	866	806	505
	0	40	641	860	629		1	174	411	686	627		0	254	866	806	505
	0	40	641	860	629		1	174	411	686	627		0	254	866	806	505
	0	40	641	860	629		1	174	411	686	627		0	254	866	806	505
	0	40	641	860	629		1	174	411	686	627		0	254	866	806	505
	0	40	641	860	629		1	174	411	686	627		0	254	866	806	505
	0	40	641	860	629		1	174	411	686	627		0	254	866	806	505
	0	40	641	860	629		1	174	411	686	627		0	254	866	806	505
	0	40	641	860	629		1	174	411	686	627		0	254	866	806	505
	0	40	641	860	629		1	174	411	686	627		0	254	866	806	505
	0	40	641	860	629		1	174	411	686	627		0	254	866	806	505
	0	40	641	860	629		1	174	411	686	627		0	254	866	806	505
	0	40	641	860	629		1	174	411	686	627		0	254	866	806	505
	0	40	641	860	629		1	174	411	686	627		0	254	866	806	505
	0	40	641	860	629		1	174	411	686	627		0	254	866	806	505
	0	40	641	860	629		1	174	411	686	627		0	254	866	806	505
	0	40	641	860	629		1	174	411	686	627		0	254	866	806	505
	0	40	641	860	629		1	174	411	686	627		0	254	866	806	505
	0	40	641	860	629		1	174	411	686	627		0	254	866	806	505
	0	40	641	860	629		1	174	411	686	627		0	254	866	806	505
	0	40	641	860	629		1	174	411	686	627		0	254	866	806	505
	0	40	641	860	629		1	174	411	686	627		0	254	866	806	505
	0	40	641	860	629		1	174	411	686	627		0	254	866	806	505
	0	40	641	860	629		1	174	411	686	627		0	254	866	806	505
	0	40	641	860	629		1	174	411	686	627		0	254	866	806	505
	0	40	641	860	629		1	174	411	686	627		0	254	866	806	505
	0	40	641	860	629		1	174	411	686	627		0	254	866	806	505
	0	40	641	860	629		1	174	411	686	627		0	254	866	806	505
	0	40	641	860	629		1	174	411	686	627		0	254	866	806	505
	0	40	641	860	629		1	174	411	686	627		0	254	866	806	505
	0	40	641	860	629		1	174	411	686	627		0	254	866	806	505
	0	40	641	860	629		1	174	411	686	627		0	254	866	806	505
	0	40	641	860	629		1	174	411	686	627		0	254	866	806	505
	0	40	641	860	629		1	174	411	686	627		0	254	866	806	505
	0	40	641	860	629		1	174	411	686	627		0	254	866	806	505
	0	40	641	860	629		1	174	411	686	627		0	254	866	806	505
	0	40	641	860	629		1	174	411	686	627		0	254	866	806	505
	0	40	641	860	629		1	174	411	686	627		0	254	866	806	505
	0	40	641	860	629		1	174	411	686	627		1	254	866	806	505
	0	40	641	860	629		1	174	411	686	627		1	254	866	806	505
	0	40	641	860	629		1	174	411	686	627		1	254	866	806	505
	0	40	641	860	629		1	174	411	686	627		1	254	866	806	505
	0	40	641	860	629		1	174	411	686	627		1	254	866	806	505
	0	40	641	860	629		1	174	411	686	627		1	254	866	806	505
	0	40	641	860	629		1	174	411	686	627		1	254	866	806	505
	0	40	641	860	629		1	174	411	686	627		1	254	866	806	505
	0	40	641	860	629		1	174	411	686	627		1	254	866	806	505
	0	40	641	860	629		1	174	411	686	627		1	254	866	806	505
	0	40	641	860	629		1	174	411	686	627		1	254	866	806	505
	0	40	641	860	629		1	174	411	686	627		1	254	866	806	505
	0	40	641	860	629		1	174	411	686	627		1	254	866	806	505
	0	40	641	860	629		1	174	411	686	627		1	254	866	806	505
	0	40	641	860	629		1	174	411	686	627		1	254	866	806	505
	0	40	641	860	629		1	174	411	686	627		1	254	866	806	505
	0	40	641	860	629		1	174	411	686	627		1	254	866	806	505
	0	40	641	860	629		1	174	411	686	627		1	254	866	806	505
	0	40	641	860	629		1	174	411	686	627		1	254	866	806	505
	0	40	641	860	629		1	174	411	686	627		1	254	866	806	505
	0	40	641	860	629		1	174	411	686	627		1	254	866	806	505
	0	40	641	860	629		1	174	411	686	627		1	254	866	806	505
	0	40	641	860	629		1	174	411	686	627		1	254	866	806	505
	0	40	641	860	629		1	174	411	686	627		1	254	866	806	505
	0	40	641	860	629		1	174	411	686	627		1	254	866	806	505
	0	40	641	860	629		1	174	411	686	627		1	254	866	806	505
	0	40	641	860	629		1	174	411	686	627		1	254	866	806	505
	0	40	641	860	629		1	174	411	686	627		1	254	866	806	505
	0	40	641	860	629		1	174	411	686	627		1	254	866	806	505
	0	40	641	860	629		1	174	411	686	627		1	254	866	806	505
	0	40	641	860	629		1	174	411	686	627		1	254	866	806	505
	0	40	641	860	629		1	174	411	686	627		1	254	866	806	505
	0	40	641	860	629		1	174	411	686	627		1	254	866	806	505
	0	40	641	860	629		1	174	411	686	627		1	254	866	806	505
	0	40	641	860	629		1	174	411	686	627		1	254	866	806	505
	0	40	641	860	629		1	174	411	686	627		1	254	866	806	505
	0	40	641	860	629		1	174	411	686	627		1	254	866	806	505
	0	40	641	860	629		1	174	411	686	627		1	254	866	806	505
	0	40	641	860	629		1	174	411	686	627		1	254	866	806	505
	0	40	641	860	629		1	174	411	686	627		1	254	866	806	505
	0	40	641	860	629		1	174	411	686	627		1	254	866	806	505
	0	40	641	860	629		1	174	411	686	627		1	254	866	806	505
	0	40	641	828	156		1	174	411	686	627		1	254	866	806	505
	0	40	641	827	148		1	174	411	686	627		1	254	866	806	505
	0	40	641	828	161		1	174	411	686	627		1	254	866	806	505
	0	40	641	829	164		1	174	411	686	627		1	254	866	806	505
	0	40	641	830	167		1	174	411	686	627		1	254	866	806	505
	0	40	641	831	168		1	174	411	686	627		1	254	866	806	505
	0	40	641	833	167		1	174	411	686	627		1	254	866	806	505
	0	40	641	833	167		1	174	411	686	627		1	254	866	806	505
	0	40	641	836	167		1	174	411	686	627		1	254	866	806	505
	0	40	641	838	166		1	174	411	686	627		1	254	866	806	505
	0	40	641	840	163		1	174	411	686	627		1	254	866	806	505
	0	40	641	840	163		1	174	411	686	627		1	254	866	806	505
	0	40	641	842	162		1	174	411	686	627		1	254	866	806	505
	0	40	641	843	162		1	174	411	686	627		1	254	866	806	505
	0	40	641	843	162		1	174	411	686	627		1	254	866	806	505
	0	40	641	843	162		1	174	411	686	627		1	254	866	806	505
	0	40	641	856	144		1	174	411	686	627		1	254	866	806	505
	0	40	641	834	185		0	174	411	686	627		1	254	866	806	505
	0	40	641	834	185		0	174	411	686	627		1	254	866	806	505
	0	40	641	834	185		0	174	411	686	627		1	254	866	806	505
	0	40	641	834	185		0	174	411	686	627		0	254	866	806	505
	0	40	641	834	185		0	174	411	686	627		0	254	866	806	505
	0	40	641	834	185		0	174	411	686	627		1	254	866	806	505
	0	40	641	838	185		0	174	411	686	627		1	254	866	806	505
	0	40	641	861	140		0	174	411	686	627		1	254	866	806	505
	0	40	641	862	141		0	174	411	686	627		1	254	866	806	505
	0	40	641	865	141		0	174	411	686	627		1	254	866	806	505
	0	40	641	868	141		0	174	411	686	627		1	254	866	806	505
	0	40	641	873	141		0	174	411	686	627		1	254	866	806	505
	0	40	641	886	140		0	174	411	686	627		1	254	866	806	505
	0	40	641	886	140		0	174	411	686	627		1	254	866	806	505
	0	40	641	886	140		0	174	411	686	627		1	254	866	806	505
	0	40	641	886	140		0	174	411	686	627		1	254	866	806	505
	0	40	641	886	140		0	174	411	686	627		1	254	866	806	505
	0	40	641	886	140		0	174	411	686	627		1	254	866	806	505
	0	40	641	886	140		0	174	411	686	627		1	254	866	806	505
	0	40	641	886	140		0	174	411	686	627		1	254	866	806	505
	0	40	641	886	140		0	174	411	686	627		1	254	866	806	505
	0	40	641	886	140		0	174	411	686	627		1	254	866	806	505
	0	40	641	886	140		0	174	411	686	627		1	254	866	806	505
	0	40	641	886	140		0	174	411	686	627		1	254	866	806	505
	0	40	641	886	140		0	174	411	686	627		1	254	866	806	505
	0	40	641	886	140		0	174	411	686	627		1	254	866	806	505
	0	40	641	886	140		0	174	411	686	627		1	254	866	806	505
	0	40	641	886	140		0	174	411	686	627		1	254	866	806	505
	0	40	641	886	140		0	174	411	686	627		1	254	866	806	505
	0	40	641	886	140		0	174	411	686	627		1	254	866	806	505
	0	40	641	886	140		0	174	411	686	627		1	254	866	806	505
	0	40	641	886	140		0	174	411	686	627		0	254	866	806	505
	0	40	641	886	140		0	174	411	686	627		0	254	866	806	505
	0	40	641	886	140		0	174	411	686	627		0	254	866	806	505
	0	40	641	886	140		0	174	411	686	627		0	254	866	806	505
	0	40	641	886	140		0	174	411	686	627		0	254	866	806	505
	0	40	641	886	140		0	174	411	686	627		0	254	866	806	505
	0	40	641	886	140		0	174	411	686	627		0	254	866	806	505
	0	40	641	886	140		0	174	411	686	627		0	254	866	806	505
	0	40	641	886	140		0	174	411	686	627		0	254	866	806	505
	0	40	641	886	140		0	174	411	686	627		0	254	866	806	505
	0	40	641	886	140		0	174	411	686	627		0	254	866	806	505
	0	40	641	886	140		0	174	411	686	627		0	254	866	806	505
	0	40	641	886	140		0	174	411	686	627		0	254	866	806	505
	0	40	641	886	140		0	174	411	686	627		0	254	866	806	505
	0	40	641	886	140		0	174	411	686	627		0	254	866	806	505
	0	40	641	886	140		0	174	411	686	627		0	254	866	806	505
	0	40	641	886	140		0	174	411	686	627		0	254	866	806	505
	0	40	641	886	140		0	174	411	686	627		0	254	866	806	505
	0	40	641	886	140		0	174	411	686	627		0	254	866	806	505
	0	40	641	886	140		0	174	411	686	627		0	254	866	806	505
	0	40	641	886	140		0	174	411	686	627		0	254	866	806	505
	0	40	641	886	140		0	174	411	686	627		0	254	866	806	505
	0	40	641	886	140		0	174	411	686	627		0	254	866	806	505
	0	40	641	886	140		0	174	411	686	627		0	254	866	806	505
	0	40	641	886	140		0	174	411	686	627		0	254	866	806	505
	0	40	641	886	140		0	174	411	686	627		0	254	866	806	505
	0	40	641	886	140		0	174	411	686	627		0	254	866	806	505
	0	40	641	886	140		0	174	411	686	627		0	254	866	806	505
	0	40	641	886	140		0	174	411	686	627		0	254	866	806	505
	0	40	641	886	140		0	174	411	686	627		0	254	866	806	505
	0	40	641	886	140		0	174	411	686	627		0	254	866	806	505
	0	40	641	886	140		0	174	411	686	627		0	254	866	806	505
	0	40	641	886	140		0	174	411	686	627		0	254	866	806	505
	0	40	641	886	140		0	174	411	686	627		0	254	866	806	505
	0	40	641	886	140		0	174	411	686	627		0	254	866	806	505
	0	40	641	886	140		0	174	411	686	627		0	254	866	806	505
	0	40	641	886	140		0	174	411	686	627		0	254	866	806	505
	0	40	641	886	140		0	174	411	686	627		0	254	866	806	505
	0	40	641	886	140		0	174	411	686	627		0	254	866	806	505
	0	40	641	886	140		0	174	411	686	627		0	254	866	806	505
	0	40	641	886	140		0	174	411	686	627		0	254	866	806	505
	0	40	641	886	140		0	174	411	686	627		0	254	866	806	505
	0	40	641	886	140		0	174	411	686	627		0	254	866	806	505
	0	40	641	886	140		0	174	411	686	627		0	254	866	806	505
	0	40	641	886	140		0	174	411	686	627		0	254	866	806	505
	0	40	641	886	140		0	174	411	686	627		0	254	866	806	505
	0	40	641	886	140		0	174	411	686	627		0	254	866	806	505
	0	40	641	886	140		0	174	411	686	627		0	254	866	806	505
	0	40	641	886	140		0	174	411	686	627		0	254	866	806	505
	0	40	641	886	140		0	174	411	686	627		0	254	866	806	505
	0	40	641	886	140		0	174	411	686	627		0	254	866	806	505
	0	40	641	886	140		0	174	411	686	627		0	254	866	806	505
	0	40	641	886	140		0	174	411	686	627		0	254	866	806	505
	0	40	641	886	140		0	174	411	686	627		0	254	866	806	505
	0	40	641	886	140		0	174	411	686	627		0	254	866	806	505
	0	40	641	886	140		0	174	411	686	627		0	254	866	806	505
	0	40	641	886	140		0	174	411	686	627		0	254	866	806	505
	0	40	641	886	140		0	174	411	686	627		0	254	866	806	505
	0	40	641	886	140		0	174	411	686	627		0	254	866	806	505
	0	40	641	886	140		0	174	411	686	627		0	254	866	806	505
	0	40	641	886	140		0	174	411	686	627		0	254	866	806	505
	0	40	641	886	140		0	174	411	686	627		0	254	866	806	505
	0	40	641	886	140		0	174	411	686	627		0	254	866	806	505
	0	40	641	886	140		0	174	411	686	627		0	254	866	806	505
	0	40	641	886	140		0	174	411	686	627		0	254	866	806	505
	0	40	641	886	140		0	174	411	686	627		0	254	866	806	505
	0	40	641	886	140		0	174	411	686	627		0	254	866	806	505
	0	40	641	886	140		0	174	411	686	627		0	254	866	806	505
	0	40	641	886	140		0	174	411	686	627		0	254	866	806	505
	0	40	641	886	140		0	174	411	686	627		0	254	866	806	505
	0	40	641	886	140		0	174	411	686	627		0	254	866	806	505
	0	40	641	886	140		0	174	411	686	627		0	254	866	806	505
	0	40	641	886	140		0	174	411	686	627		0	240	852	806	505
	0	40	641	886	140		0	174	411	686	627		0	236	844	806	505
	0	40	641	886	140		0	174	411	686	627		0	235	841	806	505
	0	40	641	886	140		0	174	411	686	627		0	234	839	806	505
	0	40	641	886	140		0	174	411	686	627		0	231	828	806	505
	0	40	641	886	140		0	174	411	686	627		0	230	818	806	505
	0	40	641	886	140		0	174	411	686	627		0	231	809	806	505
	0	40	641	886	140		0	174	411	686	627		0	233	799	806	505
	0	40	641	886	140		0	174	411	686	627		0	235	787	806	505
	0	40	641	886	140		0	174	411	686	627		0	236	784	806	505
	0	40	641	886	140		0	174	411	686	627		0	239	768	806	505
	0	40	641	886	140		0	174	411	686	627		0	241	756	806	505
	0	40	641	886	140		0	174	411	686	627		0	245	741	806	505
	0	40	641	886	140		0	174	411	686	627		0	246	738	806	505
	0	40	641	886	140		0	174	411	686	627		0	251	724	806	505
	0	40	641	886	140		0	174	411	686	627		0	254	713	806	505
	0	40	641	886	140		0	174	411	686	627		0	255	709	806	505
	0	40	641	886	140		0	174	411	686	627		0	258	698	806	505
	0	40	641	886	140		0	174	411	686	627		0	260	687	806	505
	0	40	641	886	140		0	174	411	686	627		0	262	679	806	505
	0	40	641	886	140		0	174	411	686	627		0	263	663	806	505
	0	40	641	886	140		0	174	411	686	627		0	263	655	806	505
	0	40	641	886	140		0	174	411	686	627		0	263	642	806	505
	0	40	641	886	140		0	174	411	686	627		0	261	623	806	505
	0	40	641	886	140		0	174	411	686	627		0	260	614	806	505
	0	40	641	886	140		0	174	411	686	627		0	258	604	806	505
	0	40	641	886	140		0	174	411	686	627		0	255	585	806	505
	0	40	641	886	140		0	174	411	686	627		0	254	574	806	505
	0	40	641	886	140		0	174	411	686	627		0	252	562	806	505
	0	40	641	886	140		0	174	411	686	627		0	251	552	806	505
	0	40	641	886	140		0	174	411	686	627		0	250	526	806	505
	0	40	641	886	140		0	174	411	686	627		0	251	517	806	505
	0	40	641	886	140		0	174	411	686	627		0	252	503	806	505
	0	40	641	886	140		0	174	411	686	627		0	253	488	806	505
	0	40	641	886	140		0	174	411	686	627		0	255	472	806	505
	0	40	641	886	140		0	174	411	686	627		0	256	456	806	505
	0	40	641	886	140		0	174	411	686	627		0	257	445	806	505
	0	40	641	886	140		0	174	411	686	627		0	257	441	806	505
	0	40	641	886	140		0	174	411	686	627		0	257	430	806	505
	0	40	641	886	140		0	174	411	620	483		0	257	417	806	505
	0	40	641	886	140		0	174	411	640	473		0	257	411	806	505
	0	40	641	886	140		0	174	411	640	473		0	257	400	806	505
	0	40	641	886	140		0	174	411	648	472		0	258	389	806	505
	0	40	641	886	140		0	174	411	662	467		0	258	382	806	505
	0	40	641	886	140		0	174	411	662	467		0	258	371	806	505
	0	40	641	886	140		0	174	411	719	392		0	258	362	806	505
	0	40	641	886	140		0	174	411	719	392		0	258	355	806	505
	0	40	641	886	140		0	174	411	719	392		0	257	345	806	505
	0	40	641	886	140		0	174	411	719	392		0	257	334	806	505
	0	40	641	886	140		0	174	411	719	392		0	256	326	806	505
	0	40	641	886	140		0	174	411	719	392		0	255	315	806	505
	0	40	641	886	140		0	174	411	719	392		0	255	306	806	505
	0	40	641	886	140		0	174	411	719	392		0	255	300	806	505
	0	40	641	886	140		0	174	411	719	392		0	254	291	806	505
	0	40	641	886	140		0	174	411	719	392		0	254	285	806	505
	0	40	641	886	140		0	174	411	719	392		0	253	276	806	505
	0	40	641	886	140		0	174	411	719	392		0	253	265	806	505
	0	40	641	886	140		0	174	411	719	392		0	252	259	806	505
	0	40	641	886	140		0	174	411	719	392		0	251	255	806	505
	0	40	641	886	140		0	174	411	719	392		0	250	246	806	505
	0	40	641	886	140		0	174	411	719	392		0	250	240	806	505
	0	40	641	886	140		0	174	411	719	392		0	249	236	806	505
	0	40	641	886	140		0	174	411	719	392		0	249	229	806	505
	0	40	641	886	140		0	174	411	719	392		0	249	222	806	505
	0	40	641	886	140		0	174	411	719	392		0	250	217	806	505
	0	40	641	886	140		0	174	411	719	392		0	250	214	806	505
	0	40	641	886	140		0	174	411	719	392		0	251	210	806	505
	0	40	641	886	140		0	174	411	719	392		0	251	209	806	505
	0	40	641	886	140		0	174	411	719	392		0	251	207	806	505
	0	40	641	886	140		0	174	411	719	392		0	251	207	806	505
	0	40	641	886	140		0	174	411	719	392		0	251	206	806	505
	0	40	641	886	140		0	174	411	719	392		0	250	206	806	505
	0	40	641	886	140		0	174	411	719	392		0	250	206	806	505
	0	40	641	886	140		0	174	411	719	392		0	250	206	806	505
	0	40	641	886	140		0	174	411	719	392		0	250	206	806	505
	0	40	641	886	140		0	174	411	719	392		0	250	206	806	505
	0	40	641	886	140		0	174	411	719	392		0	250	206	806	505
	0	40	641	886	140		0	174	411	719	392		0	250	206	806	505
	0	40	641	886	140		0	174	411	719	392		0	250	206	806	505
	0	40	641	886	140		0	174	411	719	392		0	250	206	806	505
	0	40	641	886	140		0	174	411	719	392		0	250	206	806	505
	0	40	641	886	140		0	174	411	719	392		0	250	206	806	505
	0	40	641	886	140		0	174	411	719	392		0	250	206	806	505
	0	40	641	886	140		0	174	411	719	392		0	250	206	806	505
	0	40	641	886	140		0	174	411	719	392		0	250	206	806	505
	0	40	641	886	140		0	174	411	719	392		0	250	206	806	505
	0	40	641	886	140		0	174	411	719	392		0	250	206	806	505
	0	40	641	886	140		0	174	411	719	392		0	250	206	806	505
	0	40	641	886	140		0	174	411	719	392		0	250	206	806	505
	0	40	641	886	140		0	174	411	719	392		0	250	206	806	505
	0	40	641	886	140		0	174	411	719	392		0	250	206	806	505
	0	40	641	886	140		0	174	411	719	392		0	250	206	806	505
	0	40	641	886	140		0	174	411	719	392		0	250	206	806	505
	0	40	641	886	140		0	174	411	719	392		0	250	206	806	505
	0	40	641	886	140		0	174	411	719	392		0	250	206	806	505
	0	40	641	886	140		0	174	411	719	392		0	250	206	806	505
	0	40	641	886	140		0	174	411	719	392		0	250	206	806	505
	0	40	641	886	140		0	174	411	719	392		0	250	206	806	505
	0	40	641	886	140		0	174	411	719	392		0	250	206	806	505
	0	40	641	886	140		0	174	411	719	392		0	250	206	806	505
	0	40	641	886	140		0	174	411	719	392		0	250	206	806	505
	0	40	641	886	140		0	174	411	719	392		0	250	206	806	505
	0	40	641	886	140		0	174	411	719	392		0	250	206	806	505
	0	40	641	886	140		0	174	411	719	392		0	250	206	806	505
	0	40	641	886	140		0	174	411	719	392		0	250	206	806	505
	0	40	641	886	140		0	174	411	719	392		0	250	206	806	505
	0	40	641	886	140		0	174	411	719	392		0	250	206	806	505
	0	40	641	886	140		0	174	411	719	392		0	250	206	806	505
	0	40	641	886	140		0	174	411	719	392		0	250	206	806	505
	0	40	641	886	140		0	174	411	719	392		0	250	206	806	505
	0	40	641	886	140		0	174	411	719	392		0	250	206	806	505
	0	40	641	886	140		0	174	411	719	392		0	250	206	806	505
	0	40	641	886	140		0	174	411	719	392		0	250	206	806	505
	0	40	641	886	140		0	174	411	719	392		0	250	206	806	505
	0	40	641	886	140		0	174	411	719	392		0	250	206	806	505
	0	40	641	886	140		0	174	411	719	392		0	250	206	806	505
	0	40	641	886	140		0	174	411	719	392		0	250	206	806	505
	0	40	641	886	140		0	174	411	719	392		0	250	206	806	505
	0	40	641	886	140		0	174	411	719	392		0	250	206	806	505
	0	40	641	886	140		0	174	411	719	392		0	250	206	806	505
	0	40	641	886	140		0	174	411	719	392		0	250	206	806	505
	0	40	641	886	140		0	174	411	719	392		0	250	206	806	505
	0	40	641	886	140		0	174	411	719	392		0	250	206	806	505
	0	40	641	886	140		0	174	411	719	392		0	250	206	806	505
	0	40	641	886	140		0	174	411	719	392		0	250	206	806	505
	0	40	641	886	140		0	174	411	719	392		0	250	206	806	505
	0	40	641	886	140		0	174	411	719	392		0	250	206	806	505
	0	40	641	886	140		0	174	411	719	392		0	250	206	806	505
	0	40	641	886	140		0	174	411	719	392		0	250	206	806	505
	0	40	641	886	140		0	174	411	719	392		0	250	206	806	505
	0	40	641	886	140		0	174	411	719	392		0	250	206	806	505
	0	40	641	886	140		0	174	411	719	392		0	250	206	806	505
	0	40	641	886	140		0	174	411	719	392		0	250	206	806	505
	0	40	641	886	140		0	174	411	719	392		0	250	206	806	505
	0	40	641	886	140		0	174	411	719	392		0	250	206	806	505
	0	40	641	886	140		0	174	411	719	392		0	250	206	806	505
	0	40	641	886	140		0	174	411	719	392		0	250	206	806	505
	0	40	641	886	140		0	174	411	719	392		0	250	206	806	505
	0	40	641	886	140		0	174	411	719	392		0	250	206	806	505
	0	40	641	886	140		0	174	411	719	392		0	250	206	806	505
	0	40	641	886	140		0	174	411	719	392		0	250	206	806	505
	0	40	641	886	140		0	174	411	719	392		0	250	206	806	505
	0	40	641	886	140		0	174	411	719	392		0	250	206	806	505
	0	40	641	886	140		0	174	411	719	392		0	250	206	806	505
	0	40	641	886	140		0	174	411	719	392		0	250	206	806	505
	0	40	641	886	140		0	174	411	719	392		0	250	206	806	505
	0	40	641	886	140		0	174	411	719	392		0	250	206	806	505
	0	40	641	886	140		0	174	411	719	392		0	250	206	806	505
	0	40	641	886	140		0	174	411	719	392		0	250	206	806	505
	0	40	641	886	140		0	174	411	719	392		0	250	206	806	505
	0	40	641	886	140		0	174	411	719	392		0	250	206	806	505
	0	40	641	886	140		0	174	411	719	392		0	250	206	806	505
	0	40	641	886	140		0	174	411	719	392		0	250	206	806	505
	0	40	641	886	140		0	174	411	719	392		0	250	206	806	505
	0	40	641	886	140		0	174	411	719	392		0	250	206	806	505
	0	40	641	886	140		0	174	411	719	392		0	250	206	806	505
	0	40	641	886	140		0	174	411	719	392		0	250	206	806	505
	0	40	641	886	140		0	174	411	719	392		0	250	206	806	505
	0	40	641	886	140		0	174	411	719	392		0	250	206	806	505
	0	40	641	886	140		0	174	411	719	392		0	250	206	806	505
	0	40	641	886	140		0	174	411	719	392		0	250	206	806	505
	0	40	641	886	140		0	174	411	719	392		0	250	206	806	505
	0	40	641	886	140		0	174	411	719	392		0	250	206	806	505
	0	40	641	886	140		0	174	411	719	392		0	250	206	806	505
	0	40	641	886	140		0	174	411	719	392		0	250	206	806	505
	0	40	641	886	140		0	174	411	719	392		0	250	206	806	505
	0	40	641	886	140		0	174	411	719	392		0	250	206	806	505
	0	40	641	886	140		0	174	411	719	392		0	250	206	806	505
	0	40	641	886	140		0	174	411	719	392		0	250	206	806	505
	0	40	641	886	140		0	174	411	719	392		0	250	206	806	505
	0	40	641	886	140		0	174	411	719	392		0	250	206	806	505
	0	40	641	886	140		0	174	411	719	392		0	250	206	806	505
	0	40	641	886	140		0	174	411	719	392		0	250	206	806	505
	0	40	641	886	140		0	174	411	719	392		0	250	206	806	505
	0	40	641	886	140		0	174	411	719	392		0	250	206	806	505
	0	40	641	886	140		0	174	411	719	392		0	250	206	806	505
	0	40	641	886	140		0	174	411	719	392		1	250	206	806	505
	0	40	641	886	140		0	174	411	719	392		1	250	206	806	505
	0	40	641	886	140		0	174	411	719	392		1	250	206	806	505
	0	40	641	886	140		0	174	411	719	392		1	250	206	806	505
	0	40	641	886	140		0	174	411	719	392		1	250	206	806	505
	0	40	641	886	140		0	174	411	719	392		1	250	206	806	505
	0	40	641	886	140		0	174	411	719	392		1	250	206	806	505
	0	40	641	886	140		0	174	411	719	392		1	250	206	806	505
	0	40	641	886	140		0	174	411	719	392		1	250	206	806	505
	0	40	641	886	140		0	174	411	719	392		1	250	206	806	505
	0	40	641	886	140		0	174	411	719	392		1	250	206	806	505
	0	40	641	886	140		0	174	411	719	392		1	250	206	806	505
	0	40	641	886	140		0	174	411	719	392		1	250	206	806	505
	0	40	641	886	140		0	174	411	719	392		1	250	206	806	505
	0	40	641	886	140		0	174	411	719	392		1	250	206	806	505
	0	40	641	886	140		0	174	411	719	392		1	250	206	806	505
	0	40	641	886	140		0	174	411	719	392		1	250	206	806	505
	0	40	641	886	140		0	174	411	719	392		1	250	206	806	505
	0	40	641	886	140		0	174	411	719	392		1	250	206	806	505
	0	40	641	886	140		0	174	411	719	392		1	250	206	806	505
	0	40	641	886	140		0	174	411	719	392		1	250	206	806	505
	0	40	641	886	140		0	174	411	719	392		1	250	206	806	505
[truncated: 35,488 more rows]

## Sheet: Figure 2b
Figure 2b
	Trial time (min)
	P2	P3	C1
	7.35748	3.09673	12.8079
	5.0385	2.05208	5.0222
	6.12767	2.05826	6.40227
	8.2985	2.49543	3.44513
	8.2915	2.50764	8.37306
	11.3307	2.24229	3.33323
	8.12573	2.1283	3.52301
	5.49368	1.79359	5.52819
	8.61714	1.55264	4.45645
	10.3543	0.981624	2.83476
	9.30903	3.49861	7.1768
	10.6014	1.55276	4.96466
	8.59478	2.09003	5.5081
	3.70021	0.6341	3.71128
	7.56794	1.05815	4.45998
	8.37547	0.938555	5.8927
	9.39769	1.54399	5.78081
	3.52378	0.483869	4.08329
	15.1096	0.0795256	6.69821
	18.0835	0.613492	7.71177
	4.65728	0.965622	8.57496
	5.35434	0.819238	6.78845
	7.55042	1.21735	7.41371
	7.26426	0.8348	7.60234
	3.9808	2.48973	9.3645
	4.21716	0.77853	14.3541
	13.7823	1.00144	4.32525
	11.3065	0.725745	7.82955
	3.62844	0.955977	7.83418
	10.666	1.58457	6.9541
	8.74638	0.852137	4.76468
	13.7013	2.02547	4.13479
	6.52544	1.59297	6.5142
	7.52015	1.01551	6.4534
	20.7372	2.58347	7.51088
	10.397	1.61075	9.3867
	2.49678	1.75181	1.44641
	5.12823	2.6789	5.73684
	11.0851	1.80952	2.91821
	12.1504	0.808633	8.53895
	10.2619	0.693412	4.70506
	23.1276	4.96478	3.59843
	9.38765	1.11797	8.83218
	6.76772	1.13918	2.32075
	19.8319	1.07882	8.35727
	7.06113	1.24628	2.85903
	8.2134	1.89867	5.58865
	12.4598	1.01872	4.4463
	3.94077	1.24877	2.56462
	9.53672	1.67933	8.0872
	13.8057	0.796385	9.25468
	14.8485	1.43527	7.75987
	4.58167	2.7371	3.83487
	11.6383	2.48555	3.78915
	11.1634	2.02247	5.49055
	11.4391	3.31644	11.079
	5.03228	3.7221	13.96
	7.20672	2.00954	2.01502
	4.24317	2.13012	5.47665
	10.0268	2.20387	6.96279
	4.60331	2.43492	3.91516
	5.7026	6.05372	3.20011
	3.52438	3.68965	5.17339
	15.5879	1.87737	3.11239
	5.64674	3.94986	7.60381
	2.22487	4.06929	5.85855
	5.1086	3.15316	8.86468
	5.10511	4.51722	7.29992
	9.78072	5.30396	7.0717
	7.23806	4.33767	11.7855
	7.99955	4.37385	11.3011
	6.75865	6.73602	5.11135
	7.53704	5.63132	5.03508
	10.6583	3.90503	5.36728
	14.1937	5.54845	5.29484
	6.72361	4.47413	4.49314
	5.2783	1.70096	7.18779
	4.56202	1.56826	11.1438
	5.20522	5.89179	4.41457
	3.50187	4.48332	12.2416
	9.02687	1.14233	10.5364
	10.5104	2.87313	4.3522
	7.62741	3.16505	5.88318
	6.39621	3.97175	5.27382
	4.94558	22.7014	5.13924
	3.2835	3.34054	8.43406
	6.33535	4.97925	4.90292
	6.90276	4.96545	2.94462
	4.08811	2.5027	4.87938
	4.61676	2.38793	2.2353
	6.85298	1.9094	2.98649
	5.57137	5.93418	2.05148
	6.05121	5.48853	6.83387
	4.63198	2.57182	3.85863
	3.78881	3.54986	7.65749
	8.70741	5.2713	4.29612
	2.21109	0.0414234	4.70564
	4.32697	0.00465442	3.31325
	4.06618	0.00864077	2.75063
	3.48516	0.00509331	16.2763
	3.58308	0.00531917	3.68753
	2.48899		4.907
	9.27827		4.373
	8.92357		4.13344
	6.89573
	12.727
	7.7294
	1.57024
	3.13428
	7.34389
	2.06037
	7.81451
	6.21654
	8.84607
	7.20892
	6.38981
	5.97542
	7.56192
	8.94745
	2.78991
	7.94552
	6.99549
	7.35662
	13.4844
	2.4791
	4.5849
	7.74552
	7.31317
	5.8651
	9.55046
	6.50747
	5.0083
	6.61064
	9.72228
	4.65385
	3.15821
	8.35882
	7.02475
	4.70001
	4.11661
	3.93453
	1.9875
	6.19709
	4.17968
	5.7966
	7.53582
	7.85747
	10.4349
	9.08581
	5.9191
	7.48164
	10.1029

## Sheet: Figure 2c
Figure 2c
	Area explored (%)
	P2	P3	C1
	18.5	5	16.5
	15.5	4	5.5
	20	5	11
	22.5	6.5	10
	20.5	9	15.5
	37.5	6.5	10
	24	7	13
	21.5	5	12
	19	1.5	10.5
	23	1	10
	28.5	8.5	11.5
	18.5	3.5	14
	26	5	15
	11.5	1	17.5
	20.5	2.5	13
	18	4	14
	34.5	4.5	22.5
	11	1	14
	60	0	22.5
	31	1.5	18.5
	13.5	1.5	20
	17	1.5	30.5
	25.5	1.5	20
	32.5	1	21.5
	14.5	6	24.5
	20	1	26
	49	2.5	17.5
	36.5	2.5	23.5
	15.5	2	18.5
	31	5.5	24
	18.5	1	13
	42.5	4	12.5
	15.5	4	22.5
	18.5	1.5	23.5
	51.5	6.5	24.5
	36.5	5	24
	7.5	3.5	7
	11.5	7.5	12.5
	23.5	6.5	15
	36.5	1.5	19
	31.5	2.5	12
	49.5	10	13.5
	28.5	2.5	26.5
	24.5	2.5	11
	51	2.5	23.5
	21.5	4.5	11.5
	30	8.5	18
	41	2	14
	11.5	3	13.5
	25	8	22
	35	3	13
	47.5	2.5	17
	15	6	10
	32	7	14
	28.5	5.5	18.5
	28.5	9	32
	18.5	9	44
	24	3.5	8
	15.5	5.5	21.5
	21	11	24
	12.5	9	13
	18.5	17.5	13.5
	13.5	17	13
	45	12.5	19
	17.5	9.5	22.5
	8	8	17
	18.5	10	22.5
	13.5	8	20
	34	10.5	30
	22	13	32
	29	10	29
	22	10.5	20.5
	27.5	17.5	21
	33.5	8.5	13.5
	38	18	20
	20	6.5	18.5
	11	3.5	23.5
	12.5	3	29
	21	18	12.5
	9	10.5	22.5
	30	3.5	23
	42.5	9	20.5
	22	11.5	24
	23.5	10	18
	14	8.5	27.5
	11.5	3.5	24.5
	19	14	19.5
	17.5	11	19.5
	15	8.5	20.5
	18	10	13
	24	2.5	18.5
	26.5	12.5	11
	22	12	22
	14.5	3	10.5
	12	12.5	27.5
	27	17.5	22
	7.5	0	19
	15	0	20.5
	10	0	14.5
	10.5	0	23
	10.5	0	22
	10		22
	22.5		17.5
	17		17
	14.5
	35
	12
	5
	16
	20.5
	4.5
	23
	17
	24
	19.5
	20
	19.5
	18.5
	32
	10.5
	19
	20.5
	18.5
	35
	9.5
	15.5
	19.5
	19
	26
	22
	19.5
	19
	15.5
	34.5
	15
	8
	24
	23
	12.5
	15.5
	15
	5.5
	17.5
	14.5
	18.5
	22.5
	22.5
	29
	24.5
	16
	23
	22.5

## Sheet: Figure 2d
Figure 2d
	Stim time (min)
	P2	P3	C1
	1.8027	0.919382	2.96775
	2.06432	0.902723	1.45181
	1.42954	0.51876	2.47172
	1.93998	0.724616	2.01423
	4.25655	1.21556	3.46142
	3.61838	1.12976	1.24963
	2.27619	0.691259	1.63927
	2.86837	0.86583	1.84225
	2.90587	0.836649	2.52856
	5.61791	0.587524	1.13568
	2.57088	1.95776	1.3682
	3.55615	0.510056	2.97968
	2.25193	0.544003	3.3763
	1.52523	0.104027	1.56191
	2.12375	0.520325	1.28697
	1.75292	0.272171	1.0827
	4.58138	0.406089	2.6855
	0.723343	0.210053	1.97864
	7.95619	0	2.83976
	5.63717	0.205581	2.76128
	1.81818	0.400851	4.04914
	1.22252	0.240642	3.072
	2.11134	0.304236	3.62249
	3.95516	0.183774	1.48077
	0.850827	0.733438	3.37727
	1.3704	0.206189	5.31372
	6.78438	0.287607	1.79265
	3.24842	0.217642	2.07782
	1.15534	0.262604	2.24628
	5.14296	0.427132	2.66495
	3.91818	0.204725	1.51606
	4.55202	0.633661	1.69994
	2.03592	0.456299	1.73546
	3.32123	0.351767	1.85381
	10.8299	0.800354	2.80853
	5.59927	0.495662	3.42664
	0.834813	0.549019	0.662422
	2.09301	0.681511	1.94751
	6.62692	0.511709	1.49832
	6.57385	0.226312	2.07766
	3.43475	0.235148	1.7571
	5.06771	1.09527	1.15252
	2.74558	0.550949	3.26351
	3.39035	0.569388	0.762374
	6.02601	0.527374	2.54769
	1.91249	0.666286	1.10843
	4.61454	1.04767	2.37704
	6.14802	0.589392	1.95038
	1.2646	0.349163	1.47417
	2.22296	0.458185	3.06866
	3.68089	0.381003	1.64793
	7.49304	0.701259	2.81736
	1.17139	1.42246	1.19327
	5.80196	0.754933	1.72805
	3.16119	0.609795	2.2513
	4.26677	1.04182	4.0337
	2.56704	1.19079	5.1921
	4.0557	0.94186	1.06787
	1.19972	1.02104	2.5053
	2.30434	1.20508	2.91262
	1.38071	0.74038	1.98119
	1.44269	1.85577	1.7338
	1.10435	1.93159	2.64589
	5.38831	0.792287	1.48024
	1.4318	1.04507	3.21454
	0.662118	1.25555	2.05685
	1.60604	1.5585	3.00397
	1.79762	2.23785	2.99949
	5.49626	1.66778	2.50835
	2.34074	1.16066	3.64769
	4.075	1.42081	3.04742
	3.73745	2.78041	1.91587
	3.60301	2.72473	1.7517
	3.60912	2.3866	1.52437
	7.64632	1.56246	1.65066
	1.95978	1.53643	1.73438
	1.49077	0.728292	2.3691
	1.36547	0.524849	4.35167
	2.78828	1.52993	1.52883
	0.828488	1.65613	1.8751
	2.88102	0.500905	3.39239
	5.96188	0.851111	1.77161
	1.95767	2.11845	2.59981
	3.50688	2.58252	2.38689
	1.66836	1.67585	2.29368
	1.56948	1.07351	3.42947
	2.31283	1.68853	1.93015
	3.07528	1.29771	1.37185
	2.37031	1.28332	2.19869
	2.34728	1.09701	1.12339
	2.38396	0.930871	1.37858
	2.75456	2.20507	0.645053
	3.35026	1.80029	1.89669
	1.99393	0.504762	1.52909
	1.26321	2.04361	2.80767
	2.49178	2.02643	1.8477
	0.646891	0	1.65489
	2.23845	0	1.28676
	1.2074	0	1.12758
	0.908757	0	2.1194
	1.72439	0	1.53704
	0.704965		1.82897
	3.09269		1.1996
	2.83483		1.02589
	2.28194
	3.99713
	1.37638
	0.677172
	1.97489
	2.38273
	0.49422
	2.28222
	2.19951
	4.32027
	1.87316
	3.76218
	2.11086
	2.61505
	2.26024
	1.32172
	4.75775
	1.96991
	2.19499
	4.72535
	0.633148
	2.50645
	2.70173
	3.40547
	1.9574
	3.29297
	2.884
	2.66144
	2.21188
	4.56334
	1.46584
	1.75874
	2.36166
	1.98233
	2.40531
	1.38837
	1.97471
	0.552152
	2.03167
	2.15372
	3.18314
	3.90096
	2.10651
	5.5489
	2.59299
	2.01763
	4.03824
	2.30488

## Sheet: Figure 3a
Figure 3a			Raw data					Processed data
			Excluding object-sensation mapping trials with a normalized satisfaction score smaller than 50.					P2-Cat						P2-Apple						P2-Key						P2-Towel						P2-Toast							P3-Cat						P3-Apple
	Participant	Object (1 = cat, 2 = apple, 3 = key, 4 = towel, 5 = toast)	Chosen_amplitude (level)	Chosen_frequency (level)	Chosen_biomimetic_factor (level)	Chosen_drag (level)		Percentile_X	Percentile_Y	Percentile_Z	Median_X	Median_Y	Median_Z	Percentile_X	Percentile_Y	Percentile_Z	Median_X	Median_Y	Median_Z	Percentile_X	Percentile_Y	Percentile_Z	Median_X	Median_Y	Median_Z	Percentile_X	Percentile_Y	Percentile_Z	Median_X	Median_Y	Median_Z	Percentile_X	Percentile_Y	Percentile_Z	Median_X	Median_Y	Median_Z		Percentile_X	Percentile_Y	Percentile_Z	Median_X	Median_Y	Median_Z	Percentile_X	Percentile_Y	Percentile_Z	Median_X	Median_Y
	P2	1	10	1	2	9		9.25	1.5	7	9	1.5	9	8	3	3	8	3	5	8.25	3.75	3.5	8	3.5	7	8	2.5	4	8	3	6.5	9	2.5	5	9	2	7		4.5	5	6	4	5	6	4	4.125	6.75	4	4
	P2	1	9	2	2	9		9.23822	1.5	7.00012				7.98429	3	3.00019				8.23822	3.75	3.50031				7.98429	2.5	4.00025				8.98429	2.5	5.00025					4.47644	5	6.00012				3.98429	4.125	6.75008
	P2	3	7	8	5	3		9.22644	1.5	7.00049				7.96859	3	3.00074				8.22644	3.75	3.50123				7.96859	2.5	4.00099				8.96859	2.5	5.00099					4.45288	5	6.00049				3.96859	4.125	6.75031
	P2	5	8	3	3	5		9.21467	1.5	7.00111				7.95289	3	3.00167				8.21467	3.75	3.50278				7.95289	2.5	4.00222				8.95289	2.5	5.00222					4.42934	5	6.00111				3.95289	4.125	6.75069
	P2	5	10	10	3	3		9.20291	1.5	7.00197				7.93721	3	3.00296				8.20291	3.75	3.50493				7.93721	2.5	4.00395				8.93721	2.5	5.00395					4.40581	5	6.00197				3.93721	4.125	6.75123
	P2	2	7	8	2	3		9.19116	1.5	7.00308				7.92154	3	3.00462				8.19116	3.75	3.50771				7.92154	2.5	4.00617				8.92154	2.5	5.00617					4.38231	5	6.00308				3.92154	4.125	6.75193
	P2	1	10	5	3	7		9.17942	1.5	7.00444				7.90589	3	3.00666				8.17942	3.75	3.5111				7.90589	2.5	4.00888				8.90589	2.5	5.00888					4.35884	5	6.00444				3.90589	4.125	6.75277
	P2	5	6	3	3	5		9.1677	1.5	7.00604				7.89027	3	3.00906				8.1677	3.75	3.5151				7.89027	2.5	4.01208				8.89027	2.5	5.01208					4.3354	5	6.00604				3.89027	4.125	6.75377
	P2	2	8	3	5	3		9.156	1.5	7.00789				7.87467	3	3.01183				8.156	3.75	3.51971				7.87467	2.5	4.01577				8.87467	2.5	5.01577					4.312	5	6.00789				3.87467	4.125	6.75493
	P2	4	7	3	3	7		9.14432	1.5	7.00998				7.8591	3	3.01496				8.14432	3.75	3.52494				7.8591	2.5	4.01995				8.8591	2.5	5.01995					4.28865	5	6.00998				3.8591	4.125	6.75624
	P2	1	8	4	2	9		9.13267	1.5	7.01231				7.84357	3	3.01847				8.13267	3.75	3.53078				7.84357	2.5	4.02462				8.84357	2.5	5.02462					4.26535	5	6.01231				3.84357	4.125	6.75769
	P2	3	9	3	2	7		9.12105	1.5	7.01489				7.82807	3	3.02234				8.12105	3.75	3.53723				7.82807	2.5	4.02978				8.82807	2.5	5.02978					4.24211	5	6.01489				3.82807	4.125	6.75931
	P2	4	7	4	1	8		9.10946	1.5	7.01771				7.81262	3	3.02657				8.10946	3.75	3.54428				7.81262	2.5	4.03543				8.81262	2.5	5.03543					4.21893	5	6.01771				3.81262	4.125	6.76107
	P2	4	9	6	5	9		9.09791	1.5	7.02078				7.79721	3	3.03117				8.09791	3.75	3.55194				7.79721	2.5	4.04155				8.79721	2.5	5.04155					4.19582	5	6.02078				3.79721	4.125	6.76299
	P2	4	5	9	1	6		9.08639	1.5	7.02408				7.78186	3	3.03612				8.08639	3.75	3.56021				7.78186	2.5	4.04817				8.78186	2.5	5.04817					4.17279	5	6.02408				3.78186	4.125	6.76505
	P2	1	9	3	2	9		9.07492	1.5	7.02763				7.76655	3	3.04145				8.07492	3.75	3.56908				7.76655	2.5	4.05526				8.76655	2.5	5.05526					4.14983	5	6.02763				3.76655	4.125	6.76727
	P2	2	8	4	4	6		9.06348	1.5	7.03142				7.75131	3	3.04713				8.06348	3.75	3.57854				7.75131	2.5	4.06283				8.75131	2.5	5.06283					4.12697	5	6.03142				3.75131	4.125	6.76964
	P2	4	8	5	3	8		9.0521	1.5	7.03544				7.73613	3	3.05316				8.0521	3.75	3.58861				7.73613	2.5	4.07089				8.73613	2.5	5.07089					4.10419	5	6.03544				3.73613	4.125	6.77215
	P2	5	9	6	2	5		9.04076	1.5	7.03971				7.72101	3	3.05956				8.04076	3.75	3.59927				7.72101	2.5	4.07941				8.72101	2.5	5.07941					4.08151	5	6.03971				3.72101	4.125	6.77482
	P2	3	8	7	4	7		9.02947	1.5	7.04421				7.70596	3	3.06631				8.02947	3.75	3.61052				7.70596	2.5	4.08841				8.70596	2.5	5.08841					4.05894	5	6.04421				3.70596	4.125	6.77763
	P2	4	7	3	5	5		9.01824	1.5	7.04894				7.69098	3	3.07342				8.01824	3.75	3.62236				7.69098	2.5	4.09789				8.69098	2.5	5.09789					4.03647	5	6.04894				3.69098	4.125	6.78059
	P2	1	9	3	1	6		9.00706	1.5	7.05391				7.67608	3	3.08087				8.00706	3.75	3.63479				7.67608	2.5	4.10783				8.67608	2.5	5.10783					4.01412	5	6.05391				3.67608	4.125	6.7837
	P2	3	8	4	5	4		8.99595	1.5	7.05912				7.66126	3	3.08868				7.99595	3.75	3.6478				7.66126	2.5	4.11824				8.66126	2.5	5.11824					3.99189	5	6.05912				3.66126	4.125	6.78695
	P2	1	10	3	1	9		8.98489	1.5	7.06456				7.64653	3	3.09683				7.98489	3.75	3.66139				7.64653	2.5	4.12911				8.64653	2.5	5.12911					3.96979	5	6.06456				3.64653	4.125	6.79035
	P2	2	7	8	1	3		8.97391	1.5	7.07022				7.63188	3	3.10534				7.97391	3.75	3.67556				7.63188	2.5	4.14045				8.63188	2.5	5.14045					3.94781	5	6.07022				3.63188	4.125	6.79389
	P2	5	10	9	2	6		8.96299	1.5	7.07612				7.61732	3	3.11418				7.96299	3.75	3.6903				7.61732	2.5	4.15224				8.61732	2.5	5.15224					3.92597	5	6.07612				3.61732	4.125	6.79758
	P2	2	8	7	2	5		8.95214	1.5	7.08225				7.60285	3	3.12337				7.95214	3.75	3.70561				7.60285	2.5	4.16449				8.60285	2.5	5.16449					3.90428	5	6.08225				3.60285	4.125	6.8014
	P2	2	7	8	4	3		8.94136	1.5	7.0886				7.58849	3	3.1329				7.94136	3.75	3.72149				7.58849	2.5	4.17719				8.58849	2.5	5.17719					3.88273	5	6.0886				3.58849	4.125	6.80537
	P2	4	8	9	7	8		8.93067	1.5	7.09517				7.57422	3	3.14276				7.93067	3.75	3.73793				7.57422	2.5	4.19035				8.57422	2.5	5.19035					3.86133	5	6.09517				3.57422	4.125	6.80948
	P2	3	4	6	1	9		8.92005	1.5	7.10197				7.56006	3	3.15296				7.92005	3.75	3.75493				7.56006	2.5	4.20394				8.56006	2.5	5.20394					3.84009	5	6.10197				3.56006	4.125	6.81373
	P2	4	8	8	3	6		8.90951	1.5	7.10899				7.54601	3	3.16349				7.90951	3.75	3.77248				7.54601	2.5	4.21799				8.54601	2.5	5.21799					3.81901	5	6.10899				3.54601	4.125	6.81812
	P2	2	9	8	5	1		8.89905	1.5	7.11623				7.53207	3	3.17435				7.89905	3.75	3.79059				7.53207	2.5	4.23247				8.53207	2.5	5.23247					3.79811	5	6.11623				3.53207	4.125	6.82265
	P2	5	8	9	2	3		8.88868	1.5	7.12369				7.51825	3	3.18554				7.88868	3.75	3.80923				7.51825	2.5	4.24739				8.51825	2.5	5.24739					3.77737	5	6.12369				3.51825	4.125	6.82731
	P2	5	10	3	5	9		8.87841	1.5	7.13137				7.50454	3	3.19705				7.87841	3.75	3.82842				7.50454	2.5	4.26274				8.50454	2.5	5.26274					3.75681	5	6.13137				3.50454	4.125	6.83211
	P2	4	7	8	1	3		8.86822	1.5	7.13926				7.49096	3	3.20889				7.86822	3.75	3.84814				7.49096	2.5	4.27852				8.49096	2.5	5.27852					3.73644	5	6.13926				3.49096	4.125	6.83704
	P2	4	9	7	2	9		8.85813	1.5	7.14736				7.4775	3	3.22104				7.85813	3.75	3.8684				7.4775	2.5	4.29472				8.4775	2.5	5.29472					3.71625	5	6.14736				3.4775	4.125	6.8421
	P2	5	9	3	3	6		8.84813	1.5	7.15567				7.46417	3	3.23351				7.84813	3.75	3.88918				7.46417	2.5	4.31134				8.46417	2.5	5.31134					3.69626	5	6.15567				3.46417	4.125	6.8473
	P2	2	8	3	2	5		8.83823	1.5	7.16419				7.45098	3	3.24629				7.83823	3.75	3.91048				7.45098	2.5	4.32839				8.45098	2.5	5.32839					3.67647	5	6.16419				3.45098	4.125	6.85262
	P2	4	9	4	1	2		8.82844	1.5	7.17292				7.43792	3	3.25938				7.82844	3.75	3.9323				7.43792	2.5	4.34584				8.43792	2.5	5.34584					3.65687	5	6.17292				3.43792	4.125	6.85807
	P2	1	9	2	3	4		8.81875	1.5	7.18185				7.42499	3	3.27278				7.81875	3.75	3.95463				7.42499	2.5	4.3637				8.42499	2.5	5.3637					3.63749	5	6.18185				3.42499	4.125	6.86366
	P2	2	5	9	1	6		8.80916	1.5	7.19098				7.41221	3	3.28647				7.80916	3.75	3.97746				7.41221	2.5	4.38197				8.41221	2.5	5.38197					3.61832	5	6.19098				3.41221	4.125	6.86936
	P2	3	8	10	6	9		8.79968	1.5	7.20032				7.39958	3	3.30047				7.79968	3.75	4.00079				7.39958	2.5	4.40063				8.39958	2.5	5.40063					3.59937	5	6.20032				3.39958	4.125	6.8752
	P2	4	10	4	3	8		8.79032	1.5	7.20984				7.38709	3	3.31477				7.79032	3.75	4.02461				7.38709	2.5	4.41969				8.38709	2.5	5.41969					3.58064	5	6.20984				3.38709	4.125	6.88115
	P2	1	9	3	4	7		8.78107	1.5	7.21957				7.37476	3	3.32935				7.78107	3.75	4.04892				7.37476	2.5	4.43914				8.37476	2.5	5.43914					3.56214	5	6.21957				3.37476	4.125	6.88723
	P2	3	7	8	2	3		8.77193	1.5	7.22949				7.36258	3	3.34423				7.77193	3.75	4.07372				7.36258	2.5	4.45897				8.36258	2.5	5.45897					3.54386	5	6.22949				3.36258	4.125	6.89343
	P2	3	8	7	3	9		8.76291	1.5	7.23959				7.35055	3	3.35939				7.76291	3.75	4.09899				7.35055	2.5	4.47919				8.35055	2.5	5.47919					3.52583	5	6.23959				3.35055	4.125	6.89975
	P2	3	9	7	3	7		8.75402	1.5	7.24989				7.33869	3	3.37483				7.75402	3.75	4.12472				7.33869	2.5	4.49978				8.33869	2.5	5.49978					3.50803	5	6.24989				3.33869	4.125	6.90618
	P2	1	8	8	2	9		8.74524	1.5	7.26037				7.32699	3	3.39055				7.74524	3.75	4.15092				7.32699	2.5	4.52074				8.32699	2.5	5.52074					3.49048	5	6.26037				3.32699	4.125	6.91273
	P2	2	8	5	3	9		8.73659	1.5	7.27103				7.31545	3	3.40655				7.73659	3.75	4.17758				7.31545	2.5	4.54206				8.31545	2.5	5.54206					3.47318	5	6.27103				3.31545	4.125	6.91939
	P2	4	9	9	4	9		8.72807	1.5	7.28187				7.30409	3	3.42281				7.72807	3.75	4.20468				7.30409	2.5	4.56375				8.30409	2.5	5.56375					3.45613	5	6.28187				3.30409	4.125	6.92617
	P2	5	8	4	5	9		8.71967	1.5	7.29289				7.29289	3	3.43934				7.71967	3.75	4.23223				7.29289	2.5	4.58579				8.29289	2.5	5.58579					3.43934	5	6.29289				3.29289	4.125	6.93306
	P2	2	9	9	3	2		8.71141	1.5	7.30409				7.28187	3	3.45613				7.71141	3.75	4.26022				7.28187	2.5	4.60817				8.28187	2.5	5.60817					3.42281	5	6.30409				3.28187	4.125	6.94005
	P2	2	5	4	3	5		8.70327	1.5	7.31545				7.27103	3	3.47318				7.70327	3.75	4.28863				7.27103	2.5	4.63091				8.27103	2.5	5.63091					3.40655	5	6.31545				3.27103	4.125	6.94716
	P2	5	9	9	2	9		8.69528	1.5	7.32699				7.26037	3	3.49048				7.69528	3.75	4.31747				7.26037	2.5	4.65397				8.26037	2.5	5.65397					3.39055	5	6.32699				3.26037	4.125	6.95437
	P2	4	8	6	1	4		8.68742	1.5	7.33869				7.24989	3	3.50803				7.68742	3.75	4.34672				7.24989	2.5	4.67738				8.24989	2.5	5.67738					3.37483	5	6.33869				3.24989	4.125	6.96168
	P2	1	9	10	1	2		8.6797	1.5	7.35055				7.23959	3	3.52583				7.6797	3.75	4.37638				7.23959	2.5	4.7011				8.23959	2.5	5.7011					3.35939	5	6.35055				3.23959	4.125	6.96909
	P2	4	9	7	9	8		8.67212	1.5	7.36258				7.22949	3	3.54386				7.67212	3.75	4.40644				7.22949	2.5	4.72515				8.22949	2.5	5.72515					3.34423	5	6.36258				3.22949	4.125	6.97661
	P2	2	9	9	3	7		8.66468	1.5	7.37476				7.21957	3	3.56214				7.66468	3.75	4.43689				7.21957	2.5	4.74951				8.21957	2.5	5.74951					3.32935	5	6.37476				3.21957	4.125	6.98422
	P2	5	6	4	2	8		8.65738	1.5	7.38709				7.20984	3	3.58064				7.65738	3.75	4.46773				7.20984	2.5	4.77419				8.20984	2.5	5.77419					3.31477	5	6.38709				3.20984	4.125	6.99193
	P2	3	8	1	3	7		8.65024	1.5	7.39958				7.20032	3	3.59937				7.65024	3.75	4.49895				7.20032	2.5	4.79916				8.20032	2.5	5.79916					3.30047	5	6.39958				3.20032	4.125	6.99974
	P2	5	10	8	2	2		8.64324	1.5	7.41221				7.19098	3	3.61832				7.64324	3.75	4.53054				7.19098	2.5	4.82443				8.19098	2.5	5.82443					3.28647	5	6.41221				3.19098	4.125	7.00763
	P2	3	10	7	7	4		8.63639	1.5	7.42499				7.18185	3	3.63749				7.63639	3.75	4.56249				7.18185	2.5	4.84999				8.18185	2.5	5.84999					3.27278	5	6.42499				3.18185	4.125	7.01562
	P2	3	9	5	4	5		8.62969	1.5	7.43792				7.17292	3	3.65687				7.62969	3.75	4.59479				7.17292	2.5	4.87583				8.17292	2.5	5.87583					3.25938	5	6.43792				3.17292	4.125	7.0237
	P2	3	7	7	2	8		8.62314	1.5	7.45098				7.16419	3	3.67647				7.62314	3.75	4.62744				7.16419	2.5	4.90195				8.16419	2.5	5.90195					3.24629	5	6.45098				3.16419	4.125	7.03186
	P2	5	10	4	2	10		8.61675	1.5	7.46417				7.15567	3	3.69626				7.61675	3.75	4.66043				7.15567	2.5	4.92835				8.15567	2.5	5.92835					3.23351	5	6.46417				3.15567	4.125	7.04011
	P2	1	8	7	1	7		8.61052	1.5	7.4775				7.14736	3	3.71625				7.61052	3.75	4.69375				7.14736	2.5	4.955				8.14736	2.5	5.955					3.22104	5	6.4775				3.14736	4.125	7.04844
	P2	1	10	10	1	10		8.60444	1.5	7.49096				7.13926	3	3.73644				7.60444	3.75	4.7274				7.13926	2.5	4.98192				8.13926	2.5	5.98192					3.20889	5	6.49096				3.13926	4.125	7.05685
	P2	3	8	8	4	2		8.59853	1.5	7.50454				7.13137	3	3.75681				7.59853	3.75	4.76135				7.13137	2.5	5.00908				8.13137	2.5	6.00908					3.19705	5	6.50454				3.13137	4.125	7.06534
	P2	5	9	10	1	9		8.59277	1.5	7.51825				7.12369	3	3.77737				7.59277	3.75	4.79562				7.12369	2.5	5.03649				8.12369	2.5	6.03649					3.18554	5	6.51825				3.12369	4.125	7.0739
	P2	3	9	9	5	9		8.58718	1.5	7.53207				7.11623	3	3.79811				7.58718	3.75	4.83018				7.11623	2.5	5.06414				8.11623	2.5	6.06414					3.17435	5	6.53207				3.11623	4.125	7.08254
	P2	1	10	10	1	10		8.58175	1.5	7.54601				7.10899	3	3.81901				7.58175	3.75	4.86502				7.10899	2.5	5.09202				8.10899	2.5	6.09202					3.16349	5	6.54601				3.10899	4.125	7.09126
	P2	3	10	10	3	1		8.57648	1.5	7.56006				7.10197	3	3.84009				7.57648	3.75	4.90015				7.10197	2.5	5.12012				8.10197	2.5	6.12012					3.15296	5	6.56006				3.10197	4.125	7.10004
	P2	2	10	7	8	5		8.57138	1.5	7.57422				7.09517	3	3.86133				7.57138	3.75	4.93555				7.09517	2.5	5.14844				8.09517	2.5	6.14844					3.14276	5	6.57422				3.09517	4.125	7.10889
	P2	1	8	3	1	8		8.56645	1.5	7.58849				7.0886	3	3.88273				7.56645	3.75	4.97121				7.0886	2.5	5.17697				8.0886	2.5	6.17697					3.1329	5	6.58849				3.0886	4.125	7.1178
	P2	4	8	6	1	3		8.56168	1.5	7.60285				7.08225	3	3.90428				7.56168	3.75	5.00713				7.08225	2.5	5.2057				8.08225	2.5	6.2057					3.12337	5	6.60285				3.08225	4.125	7.12678
	P2	5	7	4	2	9		8.55709	1.5	7.61732				7.07612	3	3.92597				7.55709	3.75	5.04329				7.07612	2.5	5.23463				8.07612	2.5	6.23463					3.11418	5	6.61732				3.07612	4.125	7.13582
	P2	5	10	7	2	9		8.55267	1.5	7.63188				7.07022	3	3.94781				7.55267	3.75	5.07969				7.07022	2.5	5.26375				8.07022	2.5	6.26375					3.10534	5	6.63188				3.07022	4.125	7.14492
	P2	4	8	3	4	4		8.54842	1.5	7.64653				7.06456	3	3.96979				7.54842	3.75	5.11631				7.06456	2.5	5.29305				8.06456	2.5	6.29305					3.09683	5	6.64653				3.06456	4.125	7.15408
	P2	4	9	3	2	5		8.54434	1.5	7.66126				7.05912	3	3.99189				7.54434	3.75	5.15316				7.05912	2.5	5.32252				8.05912	2.5	6.32252					3.08868	5	6.66126				3.05912	4.125	7.16329
	P2	1	9	10	1	10		8.54044	1.5	7.67608				7.05391	3	4.01412				7.54044	3.75	5.19021				7.05391	2.5	5.35217				8.05391	2.5	6.35217					3.08087	5	6.67608				3.05391	4.125	7.17255
	P3	3	5	4	2	7		8.53671	1.5	7.69098				7.04894	3	4.03647				7.53671	3.75	5.22746				7.04894	2.5	5.38197				8.04894	2.5	6.38197					3.07342	5	6.69098				3.04894	4.125	7.18186
	P3	4	9	5	6	6		8.53316	1.5	7.70596				7.04421	3	4.05894				7.53316	3.75	5.2649				7.04421	2.5	5.41192				8.04421	2.5	6.41192					3.06631	5	6.70596				3.04421	4.125	7.19122
	P3	5	10	8	5	2		8.52978	1.5	7.72101				7.03971	3	4.08151				7.52978	3.75	5.30252				7.03971	2.5	5.44202				8.03971	2.5	6.44202					3.05956	5	6.72101				3.03971	4.125	7.20063
	P3	1	6	7	7	8		8.52658	1.5	7.73613				7.03544	3	4.10419				7.52658	3.75	5.34032				7.03544	2.5	5.47225				8.03544	2.5	6.47225					3.05316	5	6.73613				3.03544	4.125	7.21008
	P3	3	8	3	2	7		8.52356	1.5	7.75131				7.03142	3	4.12697				7.52356	3.75	5.37828				7.03142	2.5	5.50262				8.03142	2.5	6.50262					3.04713	5	6.75131				3.03142	4.125	7.21957
	P3	4	8	2	4	9		8.52072	1.5	7.76655				7.02763	3	4.14983				7.52072	3.75	5.41639				7.02763	2.5	5.53311				8.02763	2.5	6.53311					3.04145	5	6.76655				3.02763	4.125	7.2291
	P3	5	7	5	1	9		8.51806	1.5	7.78186				7.02408	3	4.17279				7.51806	3.75	5.45464				7.02408	2.5	5.56371				8.02408	2.5	6.56371					3.03612	5	6.78186				3.02408	4.125	7.23866
	P3	3	6	4	5	6		8.51558	1.5	7.79721				7.02078	3	4.19582				7.51558	3.75	5.49303				7.02078	2.5	5.59443				8.02078	2.5	6.59443					3.03117	5	6.79721				3.02078	4.125	7.24826
	P3	3	6	3	1	5		8.51328	1.5	7.81262				7.01771	3	4.21893				7.51328	3.75	5.53155				7.01771	2.5	5.62524				8.01771	2.5	6.62524					3.02657	5	6.81262				3.01771	4.125	7.25789
	P3	3	7	5	6	6		8.51117	1.5	7.82807				7.01489	3	4.24211				7.51117	3.75	5.57018				7.01489	2.5	5.65614				8.01489	2.5	6.65614					3.02234	5	6.82807				3.01489	4.125	7.26754
	P3	5	9	9	9	5		8.50923	1.5	7.84357				7.01231	3	4.26535				7.50923	3.75	5.60891				7.01231	2.5	5.68713				8.01231	2.5	6.68713					3.01847	5	6.84357				3.01231	4.125	7.27723
	P3	5	8	8	7	3		8.50748	1.5	7.8591				7.00998	3	4.28865				7.50748	3.75	5.64775				7.00998	2.5	5.7182				8.00998	2.5	6.7182					3.01496	5	6.8591				3.00998	4.125	7.28694
	P3	2	8	6	4	7		8.50591	1.5	7.87467				7.00789	3	4.312				7.50591	3.75	5.68667				7.00789	2.5	5.74933				8.00789	2.5	6.74933					3.01183	5	6.87467				3.00789	4.125	7.29667
	P3	4	6	6	5	7		8.50453	1.5	7.89027				7.00604	3	4.3354				7.50453	3.75	5.72566				7.00604	2.5	5.78053				8.00604	2.5	6.78053					3.00906	5	6.89027				3.00604	4.125	7.30642
	P3	1	4	8	2	9		8.50333	1.5	7.90589				7.00444	3	4.35884				7.50333	3.75	5.76473				7.00444	2.5	5.81178				8.00444	2.5	6.81178					3.00666	5	6.90589				3.00444	4.125	7.31618
	P3	2	6	8	5	5		8.50231	1.5	7.92154				7.00308	3	4.38231				7.50231	3.75	5.80385				7.00308	2.5	5.84308				8.00308	2.5	6.84308					3.00462	5	6.92154				3.00308	4.125	7.32596
	P3	4	4	7	3	7		8.50148	1.5	7.93721				7.00197	3	4.40581				7.50148	3.75	5.84302				7.00197	2.5	5.87442				8.00197	2.5	6.87442					3.00296	5	6.93721				3.00197	4.125	7.33576
	P3	3	5	8	3	3		8.50083	1.5	7.95289				7.00111	3	4.42934				7.50083	3.75	5.88223				7.00111	2.5	5.90579				8.00111	2.5	6.90579					3.00167	5	6.95289				3.00111	4.125	7.34556
	P3	2	9	2	3	6		8.50037	1.5	7.96859				7.00049	3	4.45288				7.50037	3.75	5.92147				7.00049	2.5	5.93718				8.00049	2.5	6.93718					3.00074	5	6.96859				3.00049	4.125	7.35537
	P3	2	7	8	3	2		8.50009	1.5	7.98429				7.00012	3	4.47644				7.50009	3.75	5.96073				7.00012	2.5	5.96859				8.00012	2.5	6.96859					3.00019	5	6.98429				3.00012	4.125	7.36518
	P3	1	8	5	1	7		8.5	1.5	8				7	3	4.5				7.5	3.75	6				7	2.5	6				8	2.5	7					3	5	7				3	4.125	7.375
	P3	1	8	7	4	3		8.50009	1.5	8.01571				7.00012	3	4.52356				7.50009	3.75	6.03927				7.00012	2.5	6.03141				8.00012	2.5	7.03141					3.00019	5	7.01571				3.00012	4.125	7.38482
	P3	1	6	8	3	3		8.50037	1.5	8.03141				7.00049	3	4.54712				7.50037	3.75	6.07853				7.00049	2.5	6.06282				8.00049	2.5	7.06282					3.00074	5	7.03141				3.00049	4.125	7.39463
	P3	5	6	7	9	7		8.50083	1.5	8.04711				7.00111	3	4.57066				7.50083	3.75	6.11777				7.00111	2.5	6.09421				8.00111	2.5	7.09421					3.00167	5	7.04711				3.00111	4.125	7.40444
	P3	4	7	4	4	5		8.50148	1.5	8.06279				7.00197	3	4.59419				7.50148	3.75	6.15698				7.00197	2.5	6.12558				8.00197	2.5	7.12558					3.00296	5	7.06279				3.00197	4.125	7.41424
	P3	2	7	6	4	3		8.50231	1.5	8.07846				7.00308	3	4.61769				7.50231	3.75	6.19615				7.00308	2.5	6.15692				8.00308	2.5	7.15692					3.00462	5	7.07846				3.00308	4.125	7.42404
	P3	4	5	5	7	7		8.50333	1.5	8.09411				7.00444	3	4.64116				7.50333	3.75	6.23527				7.00444	2.5	6.18822				8.00444	2.5	7.18822					3.00666	5	7.09411				3.00444	4.125	7.43382
	P3	5	6	5	4	3		8.50453	1.5	8.10973				7.00604	3	4.6646				7.50453	3.75	6.27434				7.00604	2.5	6.21947				8.00604	2.5	7.21947					3.00906	5	7.10973				3.00604	4.125	7.44358
	P3	3	8	7	2	5		8.50591	1.5	8.12533				7.00789	3	4.688				7.50591	3.75	6.31333				7.00789	2.5	6.25067				8.00789	2.5	7.25067					3.01183	5	7.12533				3.00789	4.125	7.45333
	P3	4	8	8	4	5		8.50748	1.5	8.1409				7.00998	3	4.71135				7.50748	3.75	6.35225				7.00998	2.5	6.2818				8.00998	2.5	7.2818					3.01496	5	7.1409				3.00998	4.125	7.46306
	P3	4	6	9	2	7		8.50923	1.5	8.15643				7.01231	3	4.73465				7.50923	3.75	6.39109				7.01231	2.5	6.31287				8.01231	2.5	7.31287					3.01847	5	7.15643				3.01231	4.125	7.47277
	P3	2	8	3	4	5		8.51117	1.5	8.17193				7.01489	3	4.75789				7.51117	3.75	6.42982				7.01489	2.5	6.34386				8.01489	2.5	7.34386					3.02234	5	7.17193				3.01489	4.125	7.48246
	P3	5	5	4	4	4		8.51328	1.5	8.18738				7.01771	3	4.78107				7.51328	3.75	6.46845				7.01771	2.5	6.37476				8.01771	2.5	7.37476					3.02657	5	7.18738				3.01771	4.125	7.49211
	P3	3	5	7	2	4		8.51558	1.5	8.20279				7.02078	3	4.80418				7.51558	3.75	6.50697				7.02078	2.5	6.40557				8.02078	2.5	7.40557					3.03117	5	7.20279				3.02078	4.125	7.50174
	P3	3	7	7	3	5		8.51806	1.5	8.21814				7.02408	3	4.82721				7.51806	3.75	6.54536				7.02408	2.5	6.43629				8.02408	2.5	7.43629					3.03612	5	7.21814				3.02408	4.125	7.51134
	P3	1	6	7	5	5		8.52072	1.5	8.23345				7.02763	3	4.85017				7.52072	3.75	6.58361				7.02763	2.5	6.46689				8.02763	2.5	7.46689					3.04145	5	7.23345				3.02763	4.125	7.5209
	P3	3	3	5	3	7		8.52356	1.5	8.24869				7.03142	3	4.87303				7.52356	3.75	6.62172				7.03142	2.5	6.49738				8.03142	2.5	7.49738					3.04713	5	7.24869				3.03142	4.125	7.53043
	P3	5	6	5	4	2		8.52658	1.5	8.26387				7.03544	3	4.89581				7.52658	3.75	6.65968				7.03544	2.5	6.52775				8.03544	2.5	7.52775					3.05316	5	7.26387				3.03544	4.125	7.53992
	P3	1	9	7	8	2		8.52978	1.5	8.27899				7.03971	3	4.91849				7.52978	3.75	6.69748				7.03971	2.5	6.55798				8.03971	2.5	7.55798					3.05956	5	7.27899				3.03971	4.125	7.54937
	P3	3	8	3	2	3		8.53316	1.5	8.29404				7.04421	3	4.94106				7.53316	3.75	6.7351				7.04421	2.5	6.58808				8.04421	2.5	7.58808					3.06631	5	7.29404				3.04421	4.125	7.55878
	P3	2	8	7	8	3		8.53671	1.5	8.30902				7.04894	3	4.96353				7.53671	3.75	6.77254				7.04894	2.5	6.61803				8.04894	2.5	7.61803					3.07342	5	7.30902				3.04894	4.125	7.56814
	P3	4	6	7	4	6		8.54044	1.5	8.32392				7.05391	3	4.98588				7.54044	3.75	6.80979				7.05391	2.5	6.64783				8.05391	2.5	7.64783					3.08087	5	7.32392				3.05391	4.125	7.57745
	P3	5	5	5	4	8		8.54434	1.5	8.33874				7.05912	3	5.00811				7.54434	3.75	6.84684				7.05912	2.5	6.67748				8.05912	2.5	7.67748					3.08868	5	7.33874				3.05912	4.125	7.58671
	P3	5	5	5	4	7		8.54842	1.5	8.35347				7.06456	3	5.03021				7.54842	3.75	6.88369				7.06456	2.5	6.70695				8.06456	2.5	7.70695					3.09683	5	7.35347				3.06456	4.125	7.59592
	P3	4	7	6	4	6		8.55267	1.5	8.36812				7.07022	3	5.05219				7.55267	3.75	6.92031				7.07022	2.5	6.73625				8.07022	2.5	7.73625					3.10534	5	7.36812				3.07022	4.125	7.60508
	P3	3	7	6	7	9		8.55709	1.5	8.38268				7.07612	3	5.07403				7.55709	3.75	6.95671				7.07612	2.5	6.76537				8.07612	2.5	7.76537					3.11418	5	7.38268				3.07612	4.125	7.61418
	P3	5	5	8	6	7		8.56168	1.5	8.39715				7.08225	3	5.09572				7.56168	3.75	6.99287				7.08225	2.5	6.7943				8.08225	2.5	7.7943					3.12337	5	7.39715				3.08225	4.125	7.62322
	P3	5	5	5	6	4		8.56645	1.5	8.41151				7.0886	3	5.11727				7.56645	3.75	7.02879				7.0886	2.5	6.82303				8.0886	2.5	7.82303					3.1329	5	7.41151				3.0886	4.125	7.6322
	P3	3	6	3	5	7		8.57138	1.5	8.42578				7.09517	3	5.13867				7.57138	3.75	7.06445				7.09517	2.5	6.85156				8.09517	2.5	7.85156					3.14276	5	7.42578				3.09517	4.125	7.64111
	P3	1	6	6	4	6		8.57648	1.5	8.43994				7.10197	3	5.15991				7.57648	3.75	7.09985				7.10197	2.5	6.87988				8.10197	2.5	7.87988					3.15296	5	7.43994				3.10197	4.125	7.64996
	P3	2	7	7	5	4		8.58175	1.5	8.45399				7.10899	3	5.18099				7.58175	3.75	7.13498				7.10899	2.5	6.90798				8.10899	2.5	7.90798					3.16349	5	7.45399				3.10899	4.125	7.65874
	P3	4	9	6	4	6		8.58718	1.5	8.46793				7.11623	3	5.20189				7.58718	3.75	7.16982				7.11623	2.5	6.93586				8.11623	2.5	7.93586					3.17435	5	7.46793				3.11623	4.125	7.66746
	P3	1	7	4	3	3		8.59277	1.5	8.48175				7.12369	3	5.22263				7.59277	3.75	7.20438				7.12369	2.5	6.96351				8.12369	2.5	7.96351					3.18554	5	7.48175				3.12369	4.125	7.6761
	P3	1	9	7	9	3		8.59853	1.5	8.49546				7.13137	3	5.24319				7.59853	3.75	7.23865				7.13137	2.5	6.99092				8.13137	2.5	7.99092					3.19705	5	7.49546				3.13137	4.125	7.68466
	P3	1	3	4	4	7		8.60444	1.5	8.50904				7.13926	3	5.26356				7.60444	3.75	7.2726				7.13926	2.5	7.01808				8.13926	2.5	8.01808					3.20889	5	7.50904				3.13926	4.125	7.69315
	P3	3	7	9	5	6		8.61052	1.5	8.5225				7.14736	3	5.28375				7.61052	3.75	7.30625				7.14736	2.5	7.045				8.14736	2.5	8.045					3.22104	5	7.5225				3.14736	4.125	7.70156
	P3	4	7	5	5	8		8.61675	1.5	8.53583				7.15567	3	5.30374				7.61675	3.75	7.33957				7.15567	2.5	7.07165				8.15567	2.5	8.07165					3.23351	5	7.53583				3.15567	4.125	7.70989
	P3	5	7	6	4	5		8.62314	1.5	8.54902				7.16419	3	5.32353				7.62314	3.75	7.37256				7.16419	2.5	7.09805				8.16419	2.5	8.09805					3.24629	5	7.54902				3.16419	4.125	7.71814
	P3	5	7	7	4	2		8.62969	1.5	8.56208				7.17292	3	5.34313				7.62969	3.75	7.40521				7.17292	2.5	7.12417				8.17292	2.5	8.12417					3.25938	5	7.56208				3.17292	4.125	7.7263
	P3	1	6	6	5	5		8.63639	1.5	8.57501				7.18185	3	5.36251				7.63639	3.75	7.43751				7.18185	2.5	7.15001				8.18185	2.5	8.15001					3.27278	5	7.57501				3.18185	4.125	7.73438
	P3	2	6	6	3	3		8.64324	1.5	8.58779				7.19098	3	5.38168				7.64324	3.75	7.46946				7.19098	2.5	7.17557				8.19098	2.5	8.17557					3.28647	5	7.58779				3.19098	4.125	7.74237
	P3	4	5	5	6	8		8.65024	1.5	8.60042				7.20032	3	5.40063				7.65024	3.75	7.50105				7.20032	2.5	7.20084				8.20032	2.5	8.20084					3.30047	5	7.60042				3.20032	4.125	7.75026
	C1	3	7	3	8	10		8.65738	1.5	8.61291				7.20984	3	5.41936				7.65738	3.75	7.53227				7.20984	2.5	7.22581				8.20984	2.5	8.22581					3.31477	5	7.61291				3.20984	4.125	7.75807
	C1	3	3	5	1	1		8.66468	1.5	8.62524				7.21957	3	5.43786				7.66468	3.75	7.56311				7.21957	2.5	7.25049				8.21957	2.5	8.25049					3.32935	5	7.62524				3.21957	4.125	7.76578
	C1	3	6	5	4	1		8.67212	1.5	8.63742				7.22949	3	5.45614				7.67212	3.75	7.59356				7.22949	2.5	7.27485				8.22949	2.5	8.27485					3.34423	5	7.63742				3.22949	4.125	7.77339
	C1	4	7	7	7	2		8.6797	1.5	8.64945				7.23959	3	5.47417				7.6797	3.75	7.62362				7.23959	2.5	7.2989				8.23959	2.5	8.2989					3.35939	5	7.64945				3.23959	4.125	7.78091
	C1	3	5	3	7	6		8.68742	1.5	8.66131				7.24989	3	5.49197				7.68742	3.75	7.65328				7.24989	2.5	7.32262				8.24989	2.5	8.32262					3.37483	5	7.66131				3.24989	4.125	7.78832
	C1	5	3	9	3	9		8.69528	1.5	8.67301				7.26037	3	5.50952				7.69528	3.75	7.68253				7.26037	2.5	7.34603				8.26037	2.5	8.34603					3.39055	5	7.67301				3.26037	4.125	7.79563
	C1	1	6	6	4	3		8.70327	1.5	8.68455				7.27103	3	5.52682				7.70327	3.75	7.71137				7.27103	2.5	7.36909				8.27103	2.5	8.36909					3.40655	5	7.68455				3.27103	4.125	7.80284
	C1	5	6	7	4	1		8.71141	1.5	8.69591				7.28187	3	5.54387				7.71141	3.75	7.73978				7.28187	2.5	7.39183				8.28187	2.5	8.39183					3.42281	5	7.69591				3.28187	4.125	7.80995
	C1	4	3	7	5	4		8.71967	1.5	8.70711				7.29289	3	5.56066				7.71967	3.75	7.76777				7.29289	2.5	7.41421				8.29289	2.5	8.41421					3.43934	5	7.70711				3.29289	4.125	7.81694
	C1	1	7	6	7	7		8.72807	1.5	8.71813				7.30409	3	5.57719				7.72807	3.75	7.79532				7.30409	2.5	7.43625				8.30409	2.5	8.43625					3.45613	5	7.71813				3.30409	4.125	7.82383
	C1	5	4	5	3	3		8.73659	1.5	8.72897				7.31545	3	5.59345				7.73659	3.75	7.82242				7.31545	2.5	7.45794				8.31545	2.5	8.45794					3.47318	5	7.72897				3.31545	4.125	7.83061
	C1	4	7	4	7	8		8.74524	1.5	8.73963				7.32699	3	5.60945				7.74524	3.75	7.84908				7.32699	2.5	7.47926				8.32699	2.5	8.47926					3.49048	5	7.73963				3.32699	4.125	7.83727
	C1	5	2	9	2	2		8.75402	1.5	8.75011				7.33869	3	5.62517				7.75402	3.75	7.87528				7.33869	2.5	7.50022				8.33869	2.5	8.50022					3.50803	5	7.75011				3.33869	4.125	7.84382
	C1	1	5	9	3	7		8.76291	1.5	8.76041				7.35055	3	5.64061				7.76291	3.75	7.90101				7.35055	2.5	7.52081				8.35055	2.5	8.52081					3.52583	5	7.76041				3.35055	4.125	7.85025
	C1	5	3	4	5	8		8.77193	1.5	8.77051				7.36258	3	5.65577				7.77193	3.75	7.92628				7.36258	2.5	7.54103				8.36258	2.5	8.54103					3.54386	5	7.77051				3.36258	4.125	7.85657
	C1	1	3	1	1	4		8.78107	1.5	8.78043				7.37476	3	5.67065				7.78107	3.75	7.95108				7.37476	2.5	7.56086				8.37476	2.5	8.56086					3.56214	5	7.78043				3.37476	4.125	7.86277
	C1	4	7	4	4	8		8.79032	1.5	8.79016				7.38709	3	5.68523				7.79032	3.75	7.97539				7.38709	2.5	7.58031				8.38709	2.5	8.58031					3.58064	5	7.79016				3.38709	4.125	7.86885
	C1	2	7	2	8	2		8.79968	1.5	8.79968				7.39958	3	5.69953				7.79968	3.75	7.99921				7.39958	2.5	7.59937				8.39958	2.5	8.59937					3.59937	5	7.79968				3.39958	4.125	7.8748
	C1	3	5	3	5	8		8.80916	1.5	8.80902				7.41221	3	5.71353				7.80916	3.75	8.02254				7.41221	2.5	7.61803				8.41221	2.5	8.61803					3.61832	5	7.80902				3.41221	4.125	7.88064
	C1	3	3	4	3	8		8.81875	1.5	8.81815				7.42499	3	5.72722				7.81875	3.75	8.04537				7.42499	2.5	7.6363				8.42499	2.5	8.6363					3.63749	5	7.81815				3.42499	4.125	7.88634
	C1	4	7	5	1	3		8.82844	1.5	8.82708				7.43792	3	5.74062				7.82844	3.75	8.0677				7.43792	2.5	7.65416				8.43792	2.5	8.65416					3.65687	5	7.82708				3.43792	4.125	7.89193
	C1	5	3	2	3	6		8.83823	1.5	8.83581				7.45098	3	5.75371				7.83823	3.75	8.08952				7.45098	2.5	7.67161				8.45098	2.5	8.67161					3.67647	5	7.83581				3.45098	4.125	7.89738
	C1	4	6	3	2	6		8.84813	1.5	8.84433				7.46417	3	5.76649				7.84813	3.75	8.11082				7.46417	2.5	7.68866				8.46417	2.5	8.68866					3.69626	5	7.84433				3.46417	4.125	7.9027
	C1	5	3	3	4	7		8.85813	1.5	8.85264				7.4775	3	5.77896				7.85813	3.75	8.1316				7.4775	2.5	7.70528				8.4775	2.5	8.70528					3.71625	5	7.85264				3.4775	4.125	7.9079
	C1	4	3	6	4	3		8.86822	1.5	8.86074				7.49096	3	5.79111				7.86822	3.75	8.15186				7.49096	2.5	7.72148				8.49096	2.5	8.72148					3.73644	5	7.86074				3.49096	4.125	7.91296
	C1	4	8	7	7	3		8.87841	1.5	8.86863				7.50454	3	5.80295				7.87841	3.75	8.17158				7.50454	2.5	7.73726				8.50454	2.5	8.73726					3.75681	5	7.86863				3.50454	4.125	7.91789
	C1	5	8	4	7	4		8.88868	1.5	8.87631				7.51825	3	5.81446				7.88868	3.75	8.19077				7.51825	2.5	7.75261				8.51825	2.5	8.75261					3.77737	5	7.87631				3.51825	4.125	7.92269
	C1	3	4	8	6	6		8.89905	1.5	8.88377				7.53207	3	5.82565				7.89905	3.75	8.20941				7.53207	2.5	7.76753				8.53207	2.5	8.76753					3.79811	5	7.88377				3.53207	4.125	7.92735
	C1	2	4	6	10	10		8.90951	1.5	8.89101				7.54601	3	5.83651				7.90951	3.75	8.22752				7.54601	2.5	7.78201				8.54601	2.5	8.78201					3.81901	5	7.89101				3.54601	4.125	7.93188
	C1	4	7	7	3	4		8.92005	1.5	8.89803				7.56006	3	5.84704				7.92005	3.75	8.24507				7.56006	2.5	7.79606				8.56006	2.5	8.79606					3.84009	5	7.89803				3.56006	4.125	7.93627
	C1	1	6	5	3	8		8.93067	1.5	8.90483				7.57422	3	5.85724				7.93067	3.75	8.26207				7.57422	2.5	7.80965				8.57422	2.5	8.80965					3.86133	5	7.90483				3.57422	4.125	7.94052
	C1	1	8	8	4	5		8.94136	1.5	8.9114				7.58849	3	5.8671				7.94136	3.75	8.27851				7.58849	2.5	7.82281				8.58849	2.5	8.82281					3.88273	5	7.9114				3.58849	4.125	7.94463
	C1	1	8	9	2	9		8.95214	1.5	8.91775				7.60285	3	5.87663				7.95214	3.75	8.29439				7.60285	2.5	7.83551				8.60285	2.5	8.83551					3.90428	5	7.91775				3.60285	4.125	7.9486
	C1	2	5	3	6	6		8.96299	1.5	8.92388				7.61732	3	5.88582				7.96299	3.75	8.3097				7.61732	2.5	7.84776				8.61732	2.5	8.84776					3.92597	5	7.92388				3.61732	4.125	7.95242
	C1	1	5	7	5	4		8.97391	1.5	8.92978				7.63188	3	5.89466				7.97391	3.75	8.32444				7.63188	2.5	7.85955				8.63188	2.5	8.85955					3.94781	5	7.92978				3.63188	4.125	7.95611
	C1	2	5	6	6	7		8.98489	1.5	8.93544				7.64653	3	5.90317				7.98489	3.75	8.33861				7.64653	2.5	7.87089				8.64653	2.5	8.87089					3.96979	5	7.93544				3.64653	4.125	7.95965
	C1	2	2	2	4	8		8.99595	1.5	8.94088				7.66126	3	5.91132				7.99595	3.75	8.3522				7.66126	2.5	7.88176				8.66126	2.5	8.88176					3.99189	5	7.94088				3.66126	4.125	7.96305
	C1	4	7	9	8	5		9.00706	1.5	8.94609				7.67608	3	5.91913				8.00706	3.75	8.36521				7.67608	2.5	7.89217				8.67608	2.5	8.89217					4.01412	5	7.94609				3.67608	4.125	7.9663
	C1	1	5	7	4	4		9.01824	1.5	8.95106				7.69098	3	5.92658				8.01824	3.75	8.37764				7.69098	2.5	7.90211				8.69098	2.5	8.90211					4.03647	5	7.95106				3.69098	4.125	7.96941
	C1	2	3	8	7	3		9.02947	1.5	8.95579				7.70596	3	5.93369				8.02947	3.75	8.38948				7.70596	2.5	7.91159				8.70596	2.5	8.91159					4.05894	5	7.95579				3.70596	4.125	7.97237
	C1	2	1	3	5	4		9.04076	1.5	8.96029				7.72101	3	5.94044				8.04076	3.75	8.40073				7.72101	2.5	7.92059				8.72101	2.5	8.92059					4.08151	5	7.96029				3.72101	4.125	7.97518
	C1	2	2	5	5	4		9.0521	1.5	8.96456				7.73613	3	5.94684				8.0521	3.75	8.41139				7.73613	2.5	7.92911				8.73613	2.5	8.92911					4.10419	5	7.96456				3.73613	4.125	7.97785
	C1	2	3	4	8	10		9.06348	1.5	8.96858				7.75131	3	5.95287				8.06348	3.75	8.42146				7.75131	2.5	7.93717				8.75131	2.5	8.93717					4.12697	5	7.96858				3.75131	4.125	7.98036
	C1	3	7	9	10	7		9.07492	1.5	8.97237				7.76655	3	5.95855				8.07492	3.75	8.43092				7.76655	2.5	7.94474				8.76655	2.5	8.94474					4.14983	5	7.97237				3.76655	4.125	7.98273
	C1	2	2	4	9	6		9.08639	1.5	8.97592				7.78186	3	5.96388				8.08639	3.75	8.43979				7.78186	2.5	7.95183				8.78186	2.5	8.95183					4.17279	5	7.97592				3.78186	4.125	7.98495
	C1	3	3	6	4	4		9.09791	1.5	8.97922				7.79721	3	5.96883				8.09791	3.75	8.44806				7.79721	2.5	7.95845				8.79721	2.5	8.95845					4.19582	5	7.97922				3.79721	4.125	7.98701
	C1	3	4	4	6	3		9.10946	1.5	8.98229				7.81262	3	5.97343				8.10946	3.75	8.45572				7.81262	2.5	7.96457				8.81262	2.5	8.96457					4.21893	5	7.98229				3.81262	4.125	7.98893
	C1	1	6	9	2	4		9.12105	1.5	8.98511				7.82807	3	5.97766				8.12105	3.75	8.46277				7.82807	2.5	7.97022				8.82807	2.5	8.97022					4.24211	5	7.98511				3.82807	4.125	7.99069
	C1	5	4	7	9	8		9.13267	1.5	8.98769				7.84357	3	5.98153				8.13267	3.75	8.46922				7.84357	2.5	7.97538				8.84357	2.5	8.97538					4.26535	5	7.98769				3.84357	4.125	7.99231
	C1	5	4	9	4	7		9.14432	1.5	8.99002				7.8591	3	5.98504				8.14432	3.75	8.47506				7.8591	2.5	7.98005				8.8591	2.5	8.98005					4.28865	5	7.99002				3.8591	4.125	7.99376
	C1	3	4	2	4	10		9.156	1.5	8.99211				7.87467	3	5.98817				8.156	3.75	8.48029				7.87467	2.5	7.98423				8.87467	2.5	8.98423					4.312	5	7.99211				3.87467	4.125	7.99507
	C1	5	7	4	9	2		9.1677	1.5	8.99396				7.89027	3	5.99094				8.1677	3.75	8.4849				7.89027	2.5	7.98792				8.89027	2.5	8.98792					4.3354	5	7.99396				3.89027	4.125	7.99623
	C1	5	4	4	3	6		9.17942	1.5	8.99556				7.90589	3	5.99334				8.17942	3.75	8.4889				7.90589	2.5	7.99112				8.90589	2.5	8.99112					4.35884	5	7.99556				3.90589	4.125	7.99723
	C1	5	9	6	9	9		9.19116	1.5	8.99692				7.92154	3	5.99538				8.19116	3.75	8.49229				7.92154	2.5	7.99383				8.92154	2.5	8.99383					4.38231	5	7.99692				3.92154	4.125	7.99807
	C1	4	4	5	7	3		9.20291	1.5	8.99803				7.93721	3	5.99704				8.20291	3.75	8.49507				7.93721	2.5	7.99605				8.93721	2.5	8.99605					4.40581	5	7.99803				3.93721	4.125	7.99877
	C1	3	3	5	8	7		9.21467	1.5	8.99889				7.95289	3	5.99833				8.21467	3.75	8.49722				7.95289	2.5	7.99778				8.95289	2.5	8.99778					4.42934	5	7.99889				3.95289	4.125	7.99931
	C1	2	2	5	8	5		9.22644	1.5	8.99951				7.96859	3	5.99926				8.22644	3.75	8.49877				7.96859	2.5	7.99901				8.96859	2.5	8.99901					4.45288	5	7.99951				3.96859	4.125	7.99969
	C1	3	3	5	3	3		9.23822	1.5	8.99988				7.98429	3	5.99981				8.23822	3.75	8.49969				7.98429	2.5	7.99975				8.98429	2.5	8.99975					4.47644	5	7.99988				3.98429	4.125	7.99992
	C1	2	1	9	7	4		9.25	1.5	9				8	3	6				8.25	3.75	8.5				8	2.5	8				9	2.5	9					4.5	5	8				4	4.125	8
	C1	5	7	4	8	4		9.25	1.5	7				8	3	3				8.25	3.75	3.5				8	2.5	4				9	2.5	5					4.5	5	6				4	4.125	6.75
	C1	3	3	7	5	7		9.23823	1.49975	7.00012				7.9843	2.99951	3.00019				8.23823	3.74938	3.50031				7.9843	2.49926	4.00025				8.9843	2.49975	5.00025					4.47645	4.99901	6.00012				3.9843	4.12444	6.75008
	C1	2	4	3	8	7		9.22645	1.49951	7.00049				7.9686	2.99901	3.00074				8.22645	3.74877	3.50123				7.9686	2.49852	4.00099				8.9686	2.49951	5.00099					4.45291	4.99803	6.00049				3.9686	4.12389	6.75031
	C1	3	3	3	8	6		9.21469	1.49926	7.00111				7.95292	2.99852	3.00167				8.21469	3.74815	3.50278				7.95292	2.49778	4.00222				8.95292	2.49926	5.00222					4.42938	4.99704	6.00111				3.95292	4.12334	6.75069
	C1	5	5	7	7	7		9.20293	1.49901	7.00197				7.93724	2.99803	3.00296				8.20293	3.74753	3.50493				7.93724	2.49704	4.00395				8.93724	2.49901	5.00395					4.40586	4.99606	6.00197				3.93724	4.12278	6.75123
	C1	4	6	5	7	5		9.19118	1.49877	7.00308				7.92158	2.99754	3.00462				8.19118	3.74692	3.50771				7.92158	2.4963	4.00617				8.92158	2.49877	5.00617					4.38237	4.99507	6.00308				3.92158	4.12223	6.75193
	C1	4	5	9	2	7		9.17945	1.49852	7.00444				7.90594	2.99704	3.00666				8.17945	3.7463	3.5111				7.90594	2.49557	4.00888				8.90594	2.49852	5.00888					4.35891	4.99409	6.00444				3.90594	4.12167	6.75277
	C1	1	8	6	5	6		9.16774	1.49828	7.00604				7.89032	2.99655	3.00906				8.16774	3.74569	3.5151				7.89032	2.49483	4.01208				8.89032	2.49828	5.01208					4.33548	4.99311	6.00604				3.89032	4.12112	6.75377
	C1	4	4	6	6	7		9.15605	1.49803	7.00789				7.87473	2.99606	3.01183				8.15605	3.74508	3.51971				7.87473	2.49409	4.01577				8.87473	2.49803	5.01577					4.31209	4.99213	6.00789				3.87473	4.12057	6.75493
	C1	1	9	4	7	3		9.14438	1.49779	7.00998				7.85917	2.99557	3.01496				8.14438	3.74447	3.52494				7.85917	2.49336	4.01995				8.85917	2.49779	5.01995					4.28875	4.99115	6.00998				3.85917	4.12002	6.75624
	C1	5	5	2	8	3		9.13273	1.49754	7.01231				7.84364	2.99509	3.01847				8.13273	3.74386	3.53078				7.84364	2.49263	4.02462				8.84364	2.49754	5.02462					4.26546	4.99017	6.01231				3.84364	4.11947	6.75769
	C1	5	1	1	3	9		9.12112	1.4973	7.01489				7.82816	2.9946	3.02234				8.12112	3.74325	3.53723				7.82816	2.4919	4.02978				8.82816	2.4973	5.02978					4.24223	4.9892	6.01489				3.82816	4.11892	6.75931
	C1	4	7	2	9	6		9.10953	1.49706	7.01771				7.81271	2.99411	3.02657				8.10953	3.74264	3.54428				7.81271	2.49117	4.03543				8.81271	2.49706	5.03543					4.21907	4.98823	6.01771				3.81271	4.11838	6.76107
	C1	5	6	8	8	5		9.09798	1.49682	7.02078				7.79731	2.99363	3.03117				8.09798	3.74204	3.55194				7.79731	2.49045	4.04155				8.79731	2.49682	5.04155					4.19597	4.98726	6.02078				3.79731	4.11783	6.76299
	C1	1	9	5	9	5		9.08647	1.49657	7.02408				7.78196	2.99315	3.03612				8.08647	3.74143	3.56021				7.78196	2.48972	4.04817				8.78196	2.49657	5.04817					4.17295	4.9863	6.02408				3.78196	4.11729	6.76505
	C1	4	9	4	7	3		9.075	1.49633	7.02763				7.76667	2.99267	3.04145				8.075	3.74083	3.56908				7.76667	2.489	4.05526				8.76667	2.49633	5.05526					4.15	4.98533	6.02763				3.76667	4.11675	6.76727
	C1	1	6	8	2	3		9.06357	1.49609	7.03142				7.75143	2.99219	3.04713				8.06357	3.74024	3.57854				7.75143	2.48828	4.06283				8.75143	2.49609	5.06283					4.12715	4.98438	6.03142				3.75143	4.11621	6.76964
	C1	3	2	9	4	3		9.05219	1.49586	7.03544				7.73626	2.99171	3.05316				8.05219	3.73964	3.58861				7.73626	2.48757	4.07089				8.73626	2.49586	5.07089					4.10439	4.98342	6.03544				3.73626	4.11568	6.77215
	C1	2	2	7	8	4		9.04086	1.49562	7.03971				7.72115	2.99124	3.05956				8.04086	3.73905	3.59927				7.72115	2.48686	4.07941				8.72115	2.49562	5.07941					4.08172	4.98247	6.03971				3.72115	4.11514	6.77482
	C1	2	3	2	8	8		9.02958	1.49538	7.04421				7.7061	2.99076	3.06631				8.02958	3.73845	3.61052				7.7061	2.48615	4.08841				8.7061	2.49538	5.08841					4.05916	4.98153	6.04421				3.7061	4.11461	6.77763
	C1	1	6	3	9	1		9.01835	1.49515	7.04894				7.69114	2.99029	3.07342				8.01835	3.73787	3.62236				7.69114	2.48544	4.09789				8.69114	2.49515	5.09789					4.0367	4.98059	6.04894				3.69114	4.11408	6.78059
	C1	1	4	8	3	7		9.00718	1.49491	7.05391				7.67624	2.98983	3.08087				8.00718	3.73728	3.63479				7.67624	2.48474	4.10783				8.67624	2.49491	5.10783					4.01436	4.97965	6.05391				3.67624	4.11355	6.7837
	C1	5	7	6	7	5		8.99607	1.49468	7.05912				7.66143	2.98936	3.08868				7.99607	3.7367	3.6478				7.66143	2.48404	4.11824				8.66143	2.49468	5.11824					3.99214	4.97872	6.05912				3.66143	4.11303	6.78695
	C1	3	6	4	8	6		8.98502	1.49445	7.06456				7.6467	2.9889	3.09683				7.98502	3.73612	3.66139				7.6467	2.48335	4.12911				8.6467	2.49445	5.12911					3.97005	4.97779	6.06456				3.6467	4.11251	6.79035
	C1	2	3	3	8	2		8.97404	1.49422	7.07022				7.63206	2.98844	3.10534				7.97404	3.73555	3.67556				7.63206	2.48266	4.14045				8.63206	2.49422	5.14045					3.94809	4.97687	6.07022				3.63206	4.11199	6.79389
	C1	4	5	3	4	6		8.96313	1.49399	7.07612				7.61751	2.98798	3.11418				7.96313	3.73497	3.6903				7.61751	2.48197	4.15224				8.61751	2.49399	5.15224					3.92626	4.97596	6.07612				3.61751	4.11148	6.79758
	C1	1	2	5	2	3		8.95229	1.49376	7.08225				7.60305	2.98753	3.12337				7.95229	3.73441	3.70561				7.60305	2.48129	4.16449				8.60305	2.49376	5.16449					3.90457	4.97505	6.08225				3.60305	4.11097	6.8014
	C1	1	6	2	3	5		8.94152	1.49354	7.0886				7.58869	2.98707	3.1329				7.94152	3.73384	3.72149				7.58869	2.48061	4.17719				8.58869	2.49354	5.17719					3.88303	4.97415	6.0886				3.58869	4.11046	6.80537
	C1	3	4	2	4	3		8.93082	1.49331	7.09517				7.57443	2.98663	3.14276				7.93082	3.73328	3.73793				7.57443	2.47994	4.19035				8.57443	2.49331	5.19035					3.86165	4.97325	6.09517				3.57443	4.10995	6.80948
	C1	2	6	1	6	2		8.92021	1.49309	7.10197				7.56028	2.98618	3.15296				7.92021	3.73273	3.75493				7.56028	2.47927	4.20394				8.56028	2.49309	5.20394					3.84042	4.97236	6.10197				3.56028	4.10945	6.81373
	C1	5	8	3	9	2		8.90968	1.49287	7.10899				7.54623	2.98574	3.16349				7.90968	3.73217	3.77248				7.54623	2.47861	4.21799				8.54623	2.49287	5.21799					3.81935	4.97148	6.10899				3.54623	4.10896	6.81812
	C1	4	8	3	8	8		8.89923	1.49265	7.11623				7.5323	2.9853	3.17435				7.89923	3.73163	3.79059				7.5323	2.47795	4.23247				8.5323	2.49265	5.23247					3.79845	4.9706	6.11623				3.5323	4.10846	6.82265
	C1	1	5	2	7	8		8.88886	1.49243	7.12369				7.51848	2.98487	3.18554				7.88886	3.73108	3.80923				7.51848	2.4773	4.24739				8.51848	2.49243	5.24739					3.77773	4.96974	6.12369				3.51848	4.10798	6.82731
	C1	2	2	2	7	8		8.87859	1.49222	7.13137				7.50479	2.98444	3.19705				7.87859	3.73055	3.82842				7.50479	2.47666	4.26274				8.50479	2.49222	5.26274					3.75718	4.96887	6.13137				3.50479	4.10749	6.83211
	C1	3	6	2	9	2		8.86841	1.49201	7.13926				7.49121	2.98401	3.20889				7.86841	3.73001	3.84814				7.49121	2.47602	4.27852				8.49121	2.49201	5.27852					3.73681	4.96802	6.13926				3.49121	4.10701	6.83704
	C1	1	7	5	9	2		8.85832	1.49179	7.14736				7.47776	2.98359	3.22104				7.85832	3.72948	3.8684				7.47776	2.47538	4.29472				8.47776	2.49179	5.29472					3.71664	4.96718	6.14736				3.47776	4.10654	6.8421
	C1	2	2	3	9	8		8.84833	1.49158	7.15567				7.46444	2.98317	3.23351				7.84833	3.72896	3.88918				7.46444	2.47475	4.31134				8.46444	2.49158	5.31134					3.69666	4.96634	6.15567				3.46444	4.10607	6.8473
	C1	1	9	7	4	6		8.83844	1.49138	7.16419				7.45125	2.98275	3.24629				7.83844	3.72844	3.91048				7.45125	2.47413	4.32839				8.45125	2.49138	5.32839					3.67687	4.96551	6.16419				3.45125	4.1056	6.85262
	C1	5	4	2	10	10		8.82865	1.49117	7.17292				7.43819	2.98234	3.25938				7.82865	3.72793	3.9323				7.43819	2.47352	4.34584				8.43819	2.49117	5.34584					3.65729	4.96469	6.17292				3.43819	4.10514	6.85807
	C1	2	4	2	7	4		8.81896	1.49097	7.18185				7.42528	2.98194	3.27278				7.81896	3.72742	3.95463				7.42528	2.47291	4.3637				8.42528	2.49097	5.3637					3.63792	4.96388	6.18185				3.42528	4.10468	6.86366
	C1	4	1	2	3	1		8.80938	1.49077	7.19098				7.4125	2.98154	3.28647				7.80938	3.72692	3.97746				7.4125	2.47231	4.38197				8.4125	2.49077	5.38197					3.61876	4.96307	6.19098				3.4125	4.10423	6.86936
	C1	5	3	6	4	4		8.79991	1.49057	7.20032				7.39988	2.98114	3.30047				7.79991	3.72643	4.00079				7.39988	2.47171	4.40063				8.39988	2.49057	5.40063					3.59981	4.96228	6.20032				3.39988	4.10378	6.8752
	C1	3	3	2	7	2		8.79055	1.49037	7.20984				7.3874	2.98075	3.31477				7.79055	3.72594	4.02461				7.3874	2.47112	4.41969				8.3874	2.49037	5.41969					3.58109	4.9615	6.20984				3.3874	4.10334	6.88115
	C1	4	4	7	5	7		8.7813	1.49018	7.21957				7.37507	2.98036	3.32935				7.7813	3.72545	4.04892				7.37507	2.47054	4.43914				8.37507	2.49018	5.43914					3.5626	4.96072	6.21957				3.37507	4.10291	6.88723
								8.77217	1.48999	7.22949				7.36289	2.97998	3.34423				7.77217	3.72497	4.07372				7.36289	2.46997	4.45897				8.36289	2.48999	5.45897					3.54434	4.95996	6.22949				3.36289	4.10248	6.89343
								8.76315	1.4898	7.23959				7.35087	2.9796	3.35939				7.76315	3.7245	4.09899				7.35087	2.4694	4.47919				8.35087	2.4898	5.47919					3.52631	4.9592	6.23959				3.35087	4.10205	6.89975
								8.75426	1.48961	7.24989				7.33901	2.97923	3.37483				7.75426	3.72403	4.12472				7.33901	2.46884	4.49978				8.33901	2.48961	5.49978					3.50852	4.95846	6.24989				3.33901	4.10163	6.90618
								8.74549	1.48943	7.26037				7.32732	2.97886	3.39055				7.74549	3.72358	4.15092				7.32732	2.46829	4.52074				8.32732	2.48943	5.52074					3.49098	4.95772	6.26037				3.32732	4.10122	6.91273
								8.73684	1.48925	7.27103				7.31579	2.9785	3.40655				7.73684	3.72312	4.17758				7.31579	2.46775	4.54206				8.31579	2.48925	5.54206					3.47369	4.957	6.27103				3.31579	4.10081	6.91939
								8.72832	1.48907	7.28187				7.30443	2.97814	3.42281				7.72832	3.72268	4.20468				7.30443	2.46721	4.56375				8.30443	2.48907	5.56375					3.45665	4.95628	6.28187				3.30443	4.10041	6.92617
								8.71993	1.48889	7.29289				7.29324	2.97779	3.43934				7.71993	3.72224	4.23223				7.29324	2.46668	4.58579				8.29324	2.48889	5.58579					3.43986	4.95558	6.29289				3.29324	4.10001	6.93306
								8.71167	1.48872	7.30409				7.28223	2.97744	3.45613				7.71167	3.7218	4.26022				7.28223	2.46616	4.60817				8.28223	2.48872	5.60817					3.42334	4.95489	6.30409				3.28223	4.09962	6.94005
								8.70354	1.48855	7.31545				7.27139	2.9771	3.47318				7.70354	3.72138	4.28863				7.27139	2.46565	4.63091				8.27139	2.48855	5.63091					3.40709	4.95421	6.31545				3.27139	4.09924	6.94716
								8.69555	1.48838	7.32699				7.26073	2.97677	3.49048				7.69555	3.72096	4.31747				7.26073	2.46515	4.65397				8.26073	2.48838	5.65397					3.3911	4.95354	6.32699				3.26073	4.09886	6.95437
								8.68769	1.48822	7.33869				7.25026	2.97644	3.50803				7.68769	3.72055	4.34672				7.25026	2.46466	4.67738				8.25026	2.48822	5.67738					3.37539	4.95288	6.33869				3.25026	4.09849	6.96168
								8.67998	1.48806	7.35055				7.23997	2.97612	3.52583				7.67998	3.72014	4.37638				7.23997	2.46417	4.7011				8.23997	2.48806	5.7011					3.35995	4.95223	6.35055				3.23997	4.09813	6.96909
								8.6724	1.4879	7.36258				7.22987	2.9758	3.54386				7.6724	3.71975	4.40644				7.22987	2.4637	4.72515				8.22987	2.4879	5.72515					3.3448	4.9516	6.36258				3.22987	4.09777	6.97661
								8.66497	1.48774	7.37476				7.21995	2.97549	3.56214				7.66497	3.71936	4.43689				7.21995	2.46323	4.74951				8.21995	2.48774	5.74951					3.32993	4.95097	6.37476				3.21995	4.09742	6.98422
								8.65768	1.48759	7.38709				7.21023	2.97518	3.58064				7.65768	3.71898	4.46773				7.21023	2.46277	4.77419				8.21023	2.48759	5.77419					3.31535	4.95036	6.38709				3.21023	4.09708	6.99193
								8.65053	1.48744	7.39958				7.20071	2.97488	3.59937				7.65053	3.7186	4.49895				7.20071	2.46232	4.79916				8.20071	2.48744	5.79916					3.30106	4.94976	6.39958				3.20071	4.09674	6.99974
								8.64354	1.48729	7.41221				7.19138	2.97459	3.61832				7.64354	3.71824	4.53054				7.19138	2.46188	4.82443				8.19138	2.48729	5.82443					3.28707	4.94918	6.41221				3.19138	4.09641	7.00763
								8.63669	1.48715	7.42499				7.18225	2.9743	3.63749				7.63669	3.71788	4.56249				7.18225	2.46145	4.84999				8.18225	2.48715	5.84999					3.27338	4.9486	6.42499				3.18225	4.09609	7.01562
								8.63	1.48701	7.43792				7.17333	2.97402	3.65687				7.63	3.71753	4.59479				7.17333	2.46103	4.87583				8.17333	2.48701	5.87583					3.25999	4.94804	6.43792				3.17333	4.09577	7.0237
								8.62345	1.48687	7.45098				7.16461	2.97375	3.67647				7.62345	3.71718	4.62744				7.16461	2.46062	4.90195				8.16461	2.48687	5.90195					3.24691	4.94749	6.45098				3.16461	4.09546	7.03186
								8.61707	1.48674	7.46417				7.15609	2.97348	3.69626				7.61707	3.71685	4.66043				7.15609	2.46022	4.92835				8.15609	2.48674	5.92835					3.23413	4.94696	6.46417				3.15609	4.09516	7.04011
								8.61084	1.48661	7.4775				7.14778	2.97322	3.71625				7.61084	3.71652	4.69375				7.14778	2.45983	4.955				8.14778	2.48661	5.955					3.22167	4.94644	6.4775				3.14778	4.09487	7.04844
								8.60476	1.48648	7.49096				7.13968	2.97296	3.73644				7.60476	3.7162	4.7274				7.13968	2.45945	4.98192				8.13968	2.48648	5.98192					3.20952	4.94593	6.49096				3.13968	4.09458	7.05685
								8.59885	1.48636	7.50454				7.1318	2.97272	3.75681				7.59885	3.71589	4.76135				7.1318	2.45907	5.00908				8.1318	2.48636	6.00908					3.1977	4.94543	6.50454				3.1318	4.09431	7.06534
								8.59309	1.48624	7.51825				7.12413	2.97247	3.77737				7.59309	3.71559	4.79562				7.12413	2.45871	5.03649				8.12413	2.48624	6.03649					3.18619	4.94495	6.51825				3.12413	4.09403	7.0739
								8.5875	1.48612	7.53207				7.11667	2.97224	3.79811				7.5875	3.7153	4.83018				7.11667	2.45836	5.06414				8.11667	2.48612	6.06414					3.17501	4.94448	6.53207				3.11667	4.09377	7.08254
								8.58207	1.48601	7.54601				7.10943	2.97201	3.81901				7.58207	3.71502	4.86502				7.10943	2.45802	5.09202				8.10943	2.48601	6.09202					3.16415	4.94403	6.54601				3.10943	4.09351	7.09126
								8.57681	1.4859	7.56006				7.10242	2.97179	3.84009				7.57681	3.71474	4.90015				7.10242	2.45769	5.12012				8.10242	2.4859	6.12012					3.15362	4.94358	6.56006				3.10242	4.09327	7.10004
								8.57171	1.48579	7.57422				7.09562	2.97158	3.86133				7.57171	3.71447	4.93555				7.09562	2.45737	5.14844				8.09562	2.48579	6.14844					3.14343	4.94316	6.57422				3.09562	4.09303	7.10889
								8.56678	1.48569	7.58849				7.08905	2.97137	3.88273				7.56678	3.71422	4.97121				7.08905	2.45706	5.17697				8.08905	2.48569	6.17697					3.13357	4.94274	6.58849				3.08905	4.09279	7.1178
								8.56202	1.48559	7.60285				7.0827	2.97117	3.90428				7.56202	3.71397	5.00713				7.0827	2.45676	5.2057				8.0827	2.48559	6.2057					3.12405	4.94235	6.60285				3.0827	4.09257	7.12678
								8.55743	1.48549	7.61732				7.07658	2.97098	3.92597				7.55743	3.71373	5.04329				7.07658	2.45647	5.23463				8.07658	2.48549	6.23463					3.11486	4.94196	6.61732				3.07658	4.09235	7.13582
								8.55301	1.4854	7.63188				7.07068	2.9708	3.94781				7.55301	3.71349	5.07969				7.07068	2.45619	5.26375				8.07068	2.4854	6.26375					3.10602	4.94159	6.63188				3.07068	4.09214	7.14492
								8.54876	1.48531	7.64653				7.06502	2.97062	3.96979				7.54876	3.71327	5.11631				7.06502	2.45593	5.29305				8.06502	2.48531	6.29305					3.09753	4.94123	6.64653				3.06502	4.09194	7.15408
								8.54469	1.48522	7.66126				7.05958	2.97045	3.99189				7.54469	3.71306	5.15316				7.05958	2.45567	5.32252				8.05958	2.48522	6.32252					3.08938	4.94089	6.66126				3.05958	4.09175	7.16329
								8.54079	1.48514	7.67608				7.05438	2.97028	4.01412				7.54079	3.71285	5.19021				7.05438	2.45542	5.35217				8.05438	2.48514	6.35217					3.08157	4.94057	6.67608				3.05438	4.09157	7.17255
								8.53706	1.48506	7.69098				7.04941	2.97013	4.03647				7.53706	3.71266	5.22746				7.04941	2.45519	5.38197				8.04941	2.48506	6.38197					3.07412	4.94025	6.69098				3.04941	4.09139	7.18186
								8.53351	1.48499	7.70596				7.04468	2.96998	4.05894				7.53351	3.71247	5.2649				7.04468	2.45497	5.41192				8.04468	2.48499	6.41192					3.06702	4.93996	6.70596				3.04468	4.09123	7.19122
								8.53014	1.48492	7.72101				7.04018	2.96984	4.08151				7.53014	3.7123	5.30252				7.04018	2.45475	5.44202				8.04018	2.48492	6.44202					3.06027	4.93967	6.72101				3.04018	4.09107	7.20063
								8.52694	1.48485	7.73613				7.03592	2.9697	4.10419				7.52694	3.71213	5.34032				7.03592	2.45455	5.47225				8.03592	2.48485	6.47225					3.05388	4.93941	6.73613				3.03592	4.09092	7.21008
								8.52392	1.48479	7.75131				7.03189	2.96958	4.12697				7.52392	3.71197	5.37828				7.03189	2.45436	5.50262				8.03189	2.48479	6.50262					3.04784	4.93915	6.75131				3.03189	4.09077	7.21957
								8.52108	1.48473	7.76655				7.02811	2.96946	4.14983				7.52108	3.71182	5.41639				7.02811	2.45419	5.53311				8.02811	2.48473	6.53311					3.04216	4.93891	6.76655				3.02811	4.09064	7.2291
								8.51842	1.48467	7.78186				7.02456	2.96935	4.17279				7.51842	3.71168	5.45464				7.02456	2.45402	5.56371				8.02456	2.48467	6.56371					3.03685	4.93869	6.78186				3.02456	4.09051	7.23866
								8.51595	1.48462	7.79721				7.02126	2.96924	4.19582				7.51595	3.71155	5.49303				7.02126	2.45386	5.59443				8.02126	2.48462	6.59443					3.03189	4.93848	6.79721				3.02126	4.0904	7.24826
								8.51365	1.48457	7.81262				7.0182	2.96915	4.21893				7.51365	3.71143	5.53155				7.0182	2.45372	5.62524				8.0182	2.48457	6.62524					3.0273	4.93829	6.81262				3.0182	4.09029	7.25789
								8.51153	1.48453	7.82807				7.01538	2.96906	4.24211				7.51153	3.71132	5.57018				7.01538	2.45359	5.65614				8.01538	2.48453	6.65614					3.02307	4.93811	6.82807				3.01538	4.09019	7.26754
								8.5096	1.48449	7.84357				7.0128	2.96898	4.26535				7.5096	3.71122	5.60891				7.0128	2.45346	5.68713				8.0128	2.48449	6.68713					3.0192	4.93795	6.84357				3.0128	4.0901	7.27723
								8.50785	1.48445	7.8591				7.01046	2.9689	4.28865				7.50785	3.71113	5.64775				7.01046	2.45335	5.7182				8.01046	2.48445	6.7182					3.0157	4.93781	6.8591				3.01046	4.09002	7.28694
								8.50628	1.48442	7.87467				7.00837	2.96884	4.312				7.50628	3.71105	5.68667				7.00837	2.45326	5.74933				8.00837	2.48442	6.74933					3.01256	4.93767	6.87467				3.00837	4.08994	7.29667
								8.5049	1.48439	7.89027				7.00653	2.96878	4.3354				7.5049	3.71097	5.72566				7.00653	2.45317	5.78053				8.00653	2.48439	6.78053					3.00979	4.93756	6.89027				3.00653	4.08988	7.30642
								8.5037	1.48436	7.90589				7.00493	2.96873	4.35884				7.5037	3.71091	5.76473				7.00493	2.45309	5.81178				8.00493	2.48436	6.81178					3.00739	4.93746	6.90589				3.00493	4.08982	7.31618
								8.50268	1.48434	7.92154				7.00357	2.96869	4.38231				7.50268	3.71086	5.80385				7.00357	2.45303	5.84308				8.00357	2.48434	6.84308					3.00536	4.93737	6.92154				3.00357	4.08977	7.32596
								8.50185	1.48433	7.93721				7.00247	2.96865	4.40581				7.50185	3.71081	5.84302				7.00247	2.45298	5.87442				8.00247	2.48433	6.87442					3.0037	4.9373	6.93721				3.00247	4.08973	7.33576
								8.5012	1.48431	7.95289				7.0016	2.96862	4.42934				7.5012	3.71078	5.88223				7.0016	2.45294	5.90579				8.0016	2.48431	6.90579					3.0024	4.93725	6.95289				3.0016	4.0897	7.34556
								8.50074	1.4843	7.96859				7.00099	2.9686	4.45288				7.50074	3.71076	5.92147				7.00099	2.45291	5.93718				8.00099	2.4843	6.93718					3.00148	4.93721	6.96859				3.00099	4.08968	7.35537
								8.50046	1.4843	7.98429				7.00062	2.96859	4.47644				7.50046	3.71074	5.96073				7.00062	2.45289	5.96859				8.00062	2.4843	6.96859					3.00093	4.93719	6.98429				3.00062	4.08967	7.36518
								8.50037	1.48429	8				7.00049	2.96859	4.5				7.50037	3.71074	6				7.00049	2.45288	6				8.00049	2.48429	7					3.00074	4.93718	7				3.00049	4.08966	7.375
								8.50046	1.4843	8.01571				7.00062	2.96859	4.52356				7.50046	3.71074	6.03927				7.00062	2.45289	6.03141				8.00062	2.4843	7.03141					3.00093	4.93719	7.01571				3.00062	4.08967	7.38482
								8.50074	1.4843	8.03141				7.00099	2.9686	4.54712				7.50074	3.71076	6.07853				7.00099	2.45291	6.06282				8.00099	2.4843	7.06282					3.00148	4.93721	7.03141				3.00099	4.08968	7.39463
								8.5012	1.48431	8.04711				7.0016	2.96862	4.57066				7.5012	3.71078	6.11777				7.0016	2.45294	6.09421				8.0016	2.48431	7.09421					3.0024	4.93725	7.04711				3.0016	4.0897	7.40444
								8.50185	1.48433	8.06279				7.00247	2.96865	4.59419				7.50185	3.71081	6.15698				7.00247	2.45298	6.12558				8.00247	2.48433	7.12558					3.0037	4.9373	7.06279				3.00247	4.08973	7.41424
								8.50268	1.48434	8.07846				7.00357	2.96869	4.61769				7.50268	3.71086	6.19615				7.00357	2.45303	6.15692				8.00357	2.48434	7.15692					3.00536	4.93737	7.07846				3.00357	4.08977	7.42404
								8.5037	1.48436	8.09411				7.00493	2.96873	4.64116				7.5037	3.71091	6.23527				7.00493	2.45309	6.18822				8.00493	2.48436	7.18822					3.00739	4.93746	7.09411				3.00493	4.08982	7.43382
								8.5049	1.48439	8.10973				7.00653	2.96878	4.6646				7.5049	3.71097	6.27434				7.00653	2.45317	6.21947				8.00653	2.48439	7.21947					3.00979	4.93756	7.10973				3.00653	4.08988	7.44358
								8.50628	1.48442	8.12533				7.00837	2.96884	4.688				7.50628	3.71105	6.31333				7.00837	2.45326	6.25067				8.00837	2.48442	7.25067					3.01256	4.93767	7.12533				3.00837	4.08994	7.45333
								8.50785	1.48445	8.1409				7.01046	2.9689	4.71135				7.50785	3.71113	6.35225				7.01046	2.45335	6.2818				8.01046	2.48445	7.2818					3.0157	4.93781	7.1409				3.01046	4.09002	7.46306
								8.5096	1.48449	8.15643				7.0128	2.96898	4.73465				7.5096	3.71122	6.39109				7.0128	2.45346	6.31287				8.0128	2.48449	7.31287					3.0192	4.93795	7.15643				3.0128	4.0901	7.47277
								8.51153	1.48453	8.17193				7.01538	2.96906	4.75789				7.51153	3.71132	6.42982				7.01538	2.45359	6.34386				8.01538	2.48453	7.34386					3.02307	4.93811	7.17193				3.01538	4.09019	7.48246
								8.51365	1.48457	8.18738				7.0182	2.96915	4.78107				7.51365	3.71143	6.46845				7.0182	2.45372	6.37476				8.0182	2.48457	7.37476					3.0273	4.93829	7.18738				3.0182	4.09029	7.49211
								8.51595	1.48462	8.20279				7.02126	2.96924	4.80418				7.51595	3.71155	6.50697				7.02126	2.45386	6.40557				8.02126	2.48462	7.40557					3.03189	4.93848	7.20279				3.02126	4.0904	7.50174
								8.51842	1.48467	8.21814				7.02456	2.96935	4.82721				7.51842	3.71168	6.54536				7.02456	2.45402	6.43629				8.02456	2.48467	7.43629					3.03685	4.93869	7.21814				3.02456	4.09051	7.51134
								8.52108	1.48473	8.23345				7.02811	2.96946	4.85017				7.52108	3.71182	6.58361				7.02811	2.45419	6.46689				8.02811	2.48473	7.46689					3.04216	4.93891	7.23345				3.02811	4.09064	7.5209
								8.52392	1.48479	8.24869				7.03189	2.96958	4.87303				7.52392	3.71197	6.62172				7.03189	2.45436	6.49738				8.03189	2.48479	7.49738					3.04784	4.93915	7.24869				3.03189	4.09077	7.53043
								8.52694	1.48485	8.26387				7.03592	2.9697	4.89581				7.52694	3.71213	6.65968				7.03592	2.45455	6.52775				8.03592	2.48485	7.52775					3.05388	4.93941	7.26387				3.03592	4.09092	7.53992
								8.53014	1.48492	8.27899				7.04018	2.96984	4.91849				7.53014	3.7123	6.69748				7.04018	2.45475	6.55798				8.04018	2.48492	7.55798					3.06027	4.93967	7.27899				3.04018	4.09107	7.54937
								8.53351	1.48499	8.29404				7.04468	2.96998	4.94106				7.53351	3.71247	6.7351				7.04468	2.45497	6.58808				8.04468	2.48499	7.58808					3.06702	4.93996	7.29404				3.04468	4.09123	7.55878
								8.53706	1.48506	8.30902				7.04941	2.97013	4.96353				7.53706	3.71266	6.77254				7.04941	2.45519	6.61803				8.04941	2.48506	7.61803					3.07412	4.94025	7.30902				3.04941	4.09139	7.56814
								8.54079	1.48514	8.32392				7.05438	2.97028	4.98588				7.54079	3.71285	6.80979				7.05438	2.45542	6.64783				8.05438	2.48514	7.64783					3.08157	4.94057	7.32392				3.05438	4.09157	7.57745
								8.54469	1.48522	8.33874				7.05958	2.97045	5.00811				7.54469	3.71306	6.84684				7.05958	2.45567	6.67748				8.05958	2.48522	7.67748					3.08938	4.94089	7.33874				3.05958	4.09175	7.58671
								8.54876	1.48531	8.35347				7.06502	2.97062	5.03021				7.54876	3.71327	6.88369				7.06502	2.45593	6.70695				8.06502	2.48531	7.70695					3.09753	4.94123	7.35347				3.06502	4.09194	7.59592
								8.55301	1.4854	8.36812				7.07068	2.9708	5.05219				7.55301	3.71349	6.92031				7.07068	2.45619	6.73625				8.07068	2.4854	7.73625					3.10602	4.94159	7.36812				3.07068	4.09214	7.60508
								8.55743	1.48549	8.38268				7.07658	2.97098	5.07403				7.55743	3.71373	6.95671				7.07658	2.45647	6.76537				8.07658	2.48549	7.76537					3.11486	4.94196	7.38268				3.07658	4.09235	7.61418
								8.56202	1.48559	8.39715				7.0827	2.97117	5.09572				7.56202	3.71397	6.99287				7.0827	2.45676	6.7943				8.0827	2.48559	7.7943					3.12405	4.94235	7.39715				3.0827	4.09257	7.62322
								8.56678	1.48569	8.41151				7.08905	2.97137	5.11727				7.56678	3.71422	7.02879				7.08905	2.45706	6.82303				8.08905	2.48569	7.82303					3.13357	4.94274	7.41151				3.08905	4.09279	7.6322
								8.57171	1.48579	8.42578				7.09562	2.97158	5.13867				7.57171	3.71447	7.06445				7.09562	2.45737	6.85156				8.09562	2.48579	7.85156					3.14343	4.94316	7.42578				3.09562	4.09303	7.64111
								8.57681	1.4859	8.43994				7.10242	2.97179	5.15991				7.57681	3.71474	7.09985				7.10242	2.45769	6.87988				8.10242	2.4859	7.87988					3.15362	4.94358	7.43994				3.10242	4.09327	7.64996
								8.58207	1.48601	8.45399				7.10943	2.97201	5.18099				7.58207	3.71502	7.13498				7.10943	2.45802	6.90798				8.10943	2.48601	7.90798					3.16415	4.94403	7.45399				3.10943	4.09351	7.65874
								8.5875	1.48612	8.46793				7.11667	2.97224	5.20189				7.5875	3.7153	7.16982				7.11667	2.45836	6.93586				8.11667	2.48612	7.93586					3.17501	4.94448	7.46793				3.11667	4.09377	7.66746
								8.59309	1.48624	8.48175				7.12413	2.97247	5.22263				7.59309	3.71559	7.20438				7.12413	2.45871	6.96351				8.12413	2.48624	7.96351					3.18619	4.94495	7.48175				3.12413	4.09403	7.6761
								8.59885	1.48636	8.49546				7.1318	2.97272	5.24319				7.59885	3.71589	7.23865				7.1318	2.45907	6.99092				8.1318	2.48636	7.99092					3.1977	4.94543	7.49546				3.1318	4.09431	7.68466
								8.60476	1.48648	8.50904				7.13968	2.97296	5.26356				7.60476	3.7162	7.2726				7.13968	2.45945	7.01808				8.13968	2.48648	8.01808					3.20952	4.94593	7.50904				3.13968	4.09458	7.69315
								8.61084	1.48661	8.5225				7.14778	2.97322	5.28375				7.61084	3.71652	7.30625				7.14778	2.45983	7.045				8.14778	2.48661	8.045					3.22167	4.94644	7.5225				3.14778	4.09487	7.70156
								8.61707	1.48674	8.53583				7.15609	2.97348	5.30374				7.61707	3.71685	7.33957				7.15609	2.46022	7.07165				8.15609	2.48674	8.07165					3.23413	4.94696	7.53583				3.15609	4.09516	7.70989
								8.62345	1.48687	8.54902				7.16461	2.97375	5.32353				7.62345	3.71718	7.37256				7.16461	2.46062	7.09805				8.16461	2.48687	8.09805					3.24691	4.94749	7.54902				3.16461	4.09546	7.71814
								8.63	1.48701	8.56208				7.17333	2.97402	5.34313				7.63	3.71753	7.40521				7.17333	2.46103	7.12417				8.17333	2.48701	8.12417					3.25999	4.94804	7.56208				3.17333	4.09577	7.7263
								8.63669	1.48715	8.57501				7.18225	2.9743	5.36251				7.63669	3.71788	7.43751				7.18225	2.46145	7.15001				8.18225	2.48715	8.15001					3.27338	4.9486	7.57501				3.18225	4.09609	7.73438
								8.64354	1.48729	8.58779				7.19138	2.97459	5.38168				7.64354	3.71824	7.46946				7.19138	2.46188	7.17557				8.19138	2.48729	8.17557					3.28707	4.94918	7.58779				3.19138	4.09641	7.74237
								8.65053	1.48744	8.60042				7.20071	2.97488	5.40063				7.65053	3.7186	7.50105				7.20071	2.46232	7.20084				8.20071	2.48744	8.20084					3.30106	4.94976	7.60042				3.20071	4.09674	7.75026
								8.65768	1.48759	8.61291				7.21023	2.97518	5.41936				7.65768	3.71898	7.53227				7.21023	2.46277	7.22581				8.21023	2.48759	8.22581					3.31535	4.95036	7.61291				3.21023	4.09708	7.75807
								8.66497	1.48774	8.62524				7.21995	2.97549	5.43786				7.66497	3.71936	7.56311				7.21995	2.46323	7.25049				8.21995	2.48774	8.25049					3.32993	4.95097	7.62524				3.21995	4.09742	7.76578
								8.6724	1.4879	8.63742				7.22987	2.9758	5.45614				7.6724	3.71975	7.59356				7.22987	2.4637	7.27485				8.22987	2.4879	8.27485					3.3448	4.9516	7.63742				3.22987	4.09777	7.77339
								8.67998	1.48806	8.64945				7.23997	2.97612	5.47417				7.67998	3.72014	7.62362				7.23997	2.46417	7.2989				8.23997	2.48806	8.2989					3.35995	4.95223	7.64945				3.23997	4.09813	7.78091
								8.68769	1.48822	8.66131				7.25026	2.97644	5.49197				7.68769	3.72055	7.65328				7.25026	2.46466	7.32262				8.25026	2.48822	8.32262					3.37539	4.95288	7.66131				3.25026	4.09849	7.78832
								8.69555	1.48838	8.67301				7.26073	2.97677	5.50952				7.69555	3.72096	7.68253				7.26073	2.46515	7.34603				8.26073	2.48838	8.34603					3.3911	4.95354	7.67301				3.26073	4.09886	7.79563
								8.70354	1.48855	8.68455				7.27139	2.9771	5.52682				7.70354	3.72138	7.71137				7.27139	2.46565	7.36909				8.27139	2.48855	8.36909					3.40709	4.95421	7.68455				3.27139	4.09924	7.80284
								8.71167	1.48872	8.69591				7.28223	2.97744	5.54387				7.71167	3.7218	7.73978				7.28223	2.46616	7.39183				8.28223	2.48872	8.39183					3.42334	4.95489	7.69591				3.28223	4.09962	7.80995
								8.71993	1.48889	8.70711				7.29324	2.97779	5.56066				7.71993	3.72224	7.76777				7.29324	2.46668	7.41421				8.29324	2.48889	8.41421					3.43986	4.95558	7.70711				3.29324	4.10001	7.81694
								8.72832	1.48907	8.71813				7.30443	2.97814	5.57719				7.72832	3.72268	7.79532				7.30443	2.46721	7.43625				8.30443	2.48907	8.43625					3.45665	4.95628	7.71813				3.30443	4.10041	7.82383
								8.73684	1.48925	8.72897				7.31579	2.9785	5.59345				7.73684	3.72312	7.82242				7.31579	2.46775	7.45794				8.31579	2.48925	8.45794					3.47369	4.957	7.72897				3.31579	4.10081	7.83061
								8.74549	1.48943	8.73963				7.32732	2.97886	5.60945				7.74549	3.72358	7.84908				7.32732	2.46829	7.47926				8.32732	2.48943	8.47926					3.49098	4.95772	7.73963				3.32732	4.10122	7.83727
								8.75426	1.48961	8.75011				7.33901	2.97923	5.62517				7.75426	3.72403	7.87528				7.33901	2.46884	7.50022				8.33901	2.48961	8.50022					3.50852	4.95846	7.75011				3.33901	4.10163	7.84382
								8.76315	1.4898	8.76041				7.35087	2.9796	5.64061				7.76315	3.7245	7.90101				7.35087	2.4694	7.52081				8.35087	2.4898	8.52081					3.52631	4.9592	7.76041				3.35087	4.10205	7.85025
								8.77217	1.48999	8.77051				7.36289	2.97998	5.65577				7.77217	3.72497	7.92628				7.36289	2.46997	7.54103				8.36289	2.48999	8.54103					3.54434	4.95996	7.77051				3.36289	4.10248	7.85657
								8.7813	1.49018	8.78043				7.37507	2.98036	5.67065				7.7813	3.72545	7.95108				7.37507	2.47054	7.56086				8.37507	2.49018	8.56086					3.5626	4.96072	7.78043				3.37507	4.10291	7.86277
								8.79055	1.49037	8.79016				7.3874	2.98075	5.68523				7.79055	3.72594	7.97539				7.3874	2.47112	7.58031				8.3874	2.49037	8.58031					3.58109	4.9615	7.79016				3.3874	4.10334	7.86885
								8.79991	1.49057	8.79968				7.39988	2.98114	5.69953				7.79991	3.72643	7.99921				7.39988	2.47171	7.59937				8.39988	2.49057	8.59937					3.59981	4.96228	7.79968				3.39988	4.10378	7.8748
								8.80938	1.49077	8.80902				7.4125	2.98154	5.71353				7.80938	3.72692	8.02254				7.4125	2.47231	7.61803				8.4125	2.49077	8.61803					3.61876	4.96307	7.80902				3.4125	4.10423	7.88064
								8.81896	1.49097	8.81815				7.42528	2.98194	5.72722				7.81896	3.72742	8.04537				7.42528	2.47291	7.6363				8.42528	2.49097	8.6363					3.63792	4.96388	7.81815				3.42528	4.10468	7.88634
								8.82865	1.49117	8.82708				7.43819	2.98234	5.74062				7.82865	3.72793	8.0677				7.43819	2.47352	7.65416				8.43819	2.49117	8.65416					3.65729	4.96469	7.82708				3.43819	4.10514	7.89193
								8.83844	1.49138	8.83581				7.45125	2.98275	5.75371				7.83844	3.72844	8.08952				7.45125	2.47413	7.67161				8.45125	2.49138	8.67161					3.67687	4.96551	7.83581				3.45125	4.1056	7.89738
								8.84833	1.49158	8.84433				7.46444	2.98317	5.76649				7.84833	3.72896	8.11082				7.46444	2.47475	7.68866				8.46444	2.49158	8.68866					3.69666	4.96634	7.84433				3.46444	4.10607	7.9027
								8.85832	1.49179	8.85264				7.47776	2.98359	5.77896				7.85832	3.72948	8.1316				7.47776	2.47538	7.70528				8.47776	2.49179	8.70528					3.71664	4.96718	7.85264				3.47776	4.10654	7.9079
								8.86841	1.49201	8.86074				7.49121	2.98401	5.79111				7.86841	3.73001	8.15186				7.49121	2.47602	7.72148				8.49121	2.49201	8.72148					3.73681	4.96802	7.86074				3.49121	4.10701	7.91296
								8.87859	1.49222	8.86863				7.50479	2.98444	5.80295				7.87859	3.73055	8.17158				7.50479	2.47666	7.73726				8.50479	2.49222	8.73726					3.75718	4.96887	7.86863				3.50479	4.10749	7.91789
								8.88886	1.49243	8.87631				7.51848	2.98487	5.81446				7.88886	3.73108	8.19077				7.51848	2.4773	7.75261				8.51848	2.49243	8.75261					3.77773	4.96974	7.87631				3.51848	4.10798	7.92269
								8.89923	1.49265	8.88377				7.5323	2.9853	5.82565				7.89923	3.73163	8.20941				7.5323	2.47795	7.76753				8.5323	2.49265	8.76753					3.79845	4.9706	7.88377				3.5323	4.10846	7.92735
								8.90968	1.49287	8.89101				7.54623	2.98574	5.83651				7.90968	3.73217	8.22752				7.54623	2.47861	7.78201				8.54623	2.49287	8.78201					3.81935	4.97148	7.89101				3.54623	4.10896	7.93188
								8.92021	1.49309	8.89803				7.56028	2.98618	5.84704				7.92021	3.73273	8.24507				7.56028	2.47927	7.79606				8.56028	2.49309	8.79606					3.84042	4.97236	7.89803				3.56028	4.10945	7.93627
								8.93082	1.49331	8.90483				7.57443	2.98663	5.85724				7.93082	3.73328	8.26207				7.57443	2.47994	7.80965				8.57443	2.49331	8.80965					3.86165	4.97325	7.90483				3.57443	4.10995	7.94052
								8.94152	1.49354	8.9114				7.58869	2.98707	5.8671				7.94152	3.73384	8.27851				7.58869	2.48061	7.82281				8.58869	2.49354	8.82281					3.88303	4.97415	7.9114				3.58869	4.11046	7.94463
								8.95229	1.49376	8.91775				7.60305	2.98753	5.87663				7.95229	3.73441	8.29439				7.60305	2.48129	7.83551				8.60305	2.49376	8.83551					3.90457	4.97505	7.91775				3.60305	4.11097	7.9486
								8.96313	1.49399	8.92388				7.61751	2.98798	5.88582				7.96313	3.73497	8.3097				7.61751	2.48197	7.84776				8.61751	2.49399	8.84776					3.92626	4.97596	7.92388				3.61751	4.11148	7.95242
								8.97404	1.49422	8.92978				7.63206	2.98844	5.89466				7.97404	3.73555	8.32444				7.63206	2.48266	7.85955				8.63206	2.49422	8.85955					3.94809	4.97687	7.92978				3.63206	4.11199	7.95611
								8.98502	1.49445	8.93544				7.6467	2.9889	5.90317				7.98502	3.73612	8.33861				7.6467	2.48335	7.87089				8.6467	2.49445	8.87089					3.97005	4.97779	7.93544				3.6467	4.11251	7.95965
								8.99607	1.49468	8.94088				7.66143	2.98936	5.91132				7.99607	3.7367	8.3522				7.66143	2.48404	7.88176				8.66143	2.49468	8.88176					3.99214	4.97872	7.94088				3.66143	4.11303	7.96305
								9.00718	1.49491	8.94609				7.67624	2.98983	5.91913				8.00718	3.73728	8.36521				7.67624	2.48474	7.89217				8.67624	2.49491	8.89217					4.01436	4.97965	7.94609				3.67624	4.11355	7.9663
								9.01835	1.49515	8.95106				7.69114	2.99029	5.92658				8.01835	3.73787	8.37764				7.69114	2.48544	7.90211				8.69114	2.49515	8.90211					4.0367	4.98059	7.95106				3.69114	4.11408	7.96941
								9.02958	1.49538	8.95579				7.7061	2.99076	5.93369				8.02958	3.73845	8.38948				7.7061	2.48615	7.91159				8.7061	2.49538	8.91159					4.05916	4.98153	7.95579				3.7061	4.11461	7.97237
								9.04086	1.49562	8.96029				7.72115	2.99124	5.94044				8.04086	3.73905	8.40073				7.72115	2.48686	7.92059				8.72115	2.49562	8.92059					4.08172	4.98247	7.96029				3.72115	4.11514	7.97518
								9.05219	1.49586	8.96456				7.73626	2.99171	5.94684				8.05219	3.73964	8.41139				7.73626	2.48757	7.92911				8.73626	2.49586	8.92911					4.10439	4.98342	7.96456				3.73626	4.11568	7.97785
								9.06357	1.49609	8.96858				7.75143	2.99219	5.95287				8.06357	3.74024	8.42146				7.75143	2.48828	7.93717				8.75143	2.49609	8.93717					4.12715	4.98438	7.96858				3.75143	4.11621	7.98036
								9.075	1.49633	8.97237				7.76667	2.99267	5.95855				8.075	3.74083	8.43092				7.76667	2.489	7.94474				8.76667	2.49633	8.94474					4.15	4.98533	7.97237				3.76667	4.11675	7.98273
								9.08647	1.49657	8.97592				7.78196	2.99315	5.96388				8.08647	3.74143	8.43979				7.78196	2.48972	7.95183				8.78196	2.49657	8.95183					4.17295	4.9863	7.97592				3.78196	4.11729	7.98495
								9.09798	1.49682	8.97922				7.79731	2.99363	5.96883				8.09798	3.74204	8.44806				7.79731	2.49045	7.95845				8.79731	2.49682	8.95845					4.19597	4.98726	7.97922				3.79731	4.11783	7.98701
								9.10953	1.49706	8.98229				7.81271	2.99411	5.97343				8.10953	3.74264	8.45572				7.81271	2.49117	7.96457				8.81271	2.49706	8.96457					4.21907	4.98823	7.98229				3.81271	4.11838	7.98893
								9.12112	1.4973	8.98511				7.82816	2.9946	5.97766				8.12112	3.74325	8.46277				7.82816	2.4919	7.97022				8.82816	2.4973	8.97022					4.24223	4.9892	7.98511				3.82816	4.11892	7.99069
								9.13273	1.49754	8.98769				7.84364	2.99509	5.98153				8.13273	3.74386	8.46922				7.84364	2.49263	7.97538				8.84364	2.49754	8.97538					4.26546	4.99017	7.98769				3.84364	4.11947	7.99231
								9.14438	1.49779	8.99002				7.85917	2.99557	5.98504				8.14438	3.74447	8.47506				7.85917	2.49336	7.98005				8.85917	2.49779	8.98005					4.28875	4.99115	7.99002				3.85917	4.12002	7.99376
								9.15605	1.49803	8.99211				7.87473	2.99606	5.98817				8.15605	3.74508	8.48029				7.87473	2.49409	7.98423				8.87473	2.49803	8.98423					4.31209	4.99213	7.99211				3.87473	4.12057	7.99507
								9.16774	1.49828	8.99396				7.89032	2.99655	5.99094				8.16774	3.74569	8.4849				7.89032	2.49483	7.98792				8.89032	2.49828	8.98792					4.33548	4.99311	7.99396				3.89032	4.12112	7.99623
								9.17945	1.49852	8.99556				7.90594	2.99704	5.99334				8.17945	3.7463	8.4889				7.90594	2.49557	7.99112				8.90594	2.49852	8.99112					4.35891	4.99409	7.99556				3.90594	4.12167	7.99723
								9.19118	1.49877	8.99692				7.92158	2.99754	5.99538				8.19118	3.74692	8.49229				7.92158	2.4963	7.99383				8.92158	2.49877	8.99383					4.38237	4.99507	7.99692				3.92158	4.12223	7.99807
								9.20293	1.49901	8.99803				7.93724	2.99803	5.99704				8.20293	3.74753	8.49507				7.93724	2.49704	7.99605				8.93724	2.49901	8.99605					4.40586	4.99606	7.99803				3.93724	4.12278	7.99877
								9.21469	1.49926	8.99889				7.95292	2.99852	5.99833				8.21469	3.74815	8.49722				7.95292	2.49778	7.99778				8.95292	2.49926	8.99778					4.42938	4.99704	7.99889				3.95292	4.12334	7.99931
								9.22645	1.49951	8.99951				7.9686	2.99901	5.99926				8.22645	3.74877	8.49877				7.9686	2.49852	7.99901				8.9686	2.49951	8.99901					4.45291	4.99803	7.99951				3.9686	4.12389	7.99969
								9.23823	1.49975	8.99988				7.9843	2.99951	5.99981				8.23823	3.74938	8.49969				7.9843	2.49926	7.99975				8.9843	2.49975	8.99975					4.47645	4.99901	7.99988				3.9843	4.12444	7.99992
								9.25	1.5	9				8	3	6				8.25	3.75	8.5				8	2.5	8				9	2.5	9					4.5	5	8				4	4.125	8
								9.25	1.5	7				8	3	3				8.25	3.75	3.5				8	2.5	4				9	2.5	5					4.5	5	6				4	4.125	6.75
								9.23824	1.49951	7.00012				7.98432	2.99901	3.00019				8.23824	3.74877	3.50031				7.98432	2.49852	4.00025				8.98432	2.49951	5.00025					4.47649	4.99803	6.00012				3.98432	4.12389	6.75008
								9.22649	1.49901	7.00049				7.96865	2.99803	3.00074				8.22649	3.74753	3.50123				7.96865	2.49704	4.00099				8.96865	2.49901	5.00099					4.45298	4.99606	6.00049				3.96865	4.12278	6.75031
								9.21474	1.49852	7.00111				7.95299	2.99704	3.00167				8.21474	3.7463	3.50278				7.95299	2.49556	4.00222				8.95299	2.49852	5.00222					4.42948	4.99408	6.00111				3.95299	4.12167	6.75069
								9.203	1.49803	7.00197				7.93733	2.99606	3.00296				8.203	3.74507	3.50493				7.93733	2.49409	4.00395				8.93733	2.49803	5.00395					4.406	4.99211	6.00197				3.93733	4.12056	6.75123
								9.19127	1.49754	7.00308				7.9217	2.99507	3.00462				8.19127	3.74384	3.50771				7.9217	2.49261	4.00617				8.9217	2.49754	5.00617					4.38254	4.99015	6.00308				3.9217	4.11946	6.75193
								9.17956	1.49705	7.00444				7.90608	2.99409	3.00666				8.17956	3.74261	3.5111				7.90608	2.49114	4.00888				8.90608	2.49705	5.00888					4.35912	4.98818	6.00444				3.90608	4.11835	6.75277
								9.16786	1.49655	7.00604				7.89048	2.99311	3.00906				8.16786	3.74139	3.5151				7.89048	2.48966	4.01208				8.89048	2.49655	5.01208					4.33572	4.98622	6.00604				3.89048	4.11725	6.75377
								9.15619	1.49607	7.00789				7.87491	2.99213	3.01183				8.15619	3.74016	3.51971				7.87491	2.4882	4.01577				8.87491	2.49607	5.01577					4.31237	4.98426	6.00789				3.87491	4.11615	6.75493
								9.14453	1.49558	7.00998				7.85938	2.99115	3.01496				8.14453	3.73894	3.52494				7.85938	2.48673	4.01995				8.85938	2.49558	5.01995					4.28907	4.98231	6.00998				3.85938	4.11505	6.75624
								9.13291	1.49509	7.01231				7.84387	2.99018	3.01847				8.13291	3.73772	3.53078				7.84387	2.48527	4.02462				8.84387	2.49509	5.02462					4.26581	4.98035	6.01231				3.84387	4.11395	6.75769
								9.12131	1.4946	7.01489				7.82841	2.9892	3.02234				8.12131	3.73651	3.53723				7.82841	2.48381	4.02978				8.82841	2.4946	5.02978					4.24262	4.97841	6.01489				3.82841	4.11286	6.75931
								9.10974	1.49412	7.01771				7.81299	2.98823	3.02657				8.10974	3.73529	3.54428				7.81299	2.48235	4.03543				8.81299	2.49412	5.03543					4.21948	4.97647	6.01771				3.81299	4.11176	6.76107
								9.09821	1.49363	7.02078				7.79761	2.98727	3.03117				8.09821	3.73408	3.55194				7.79761	2.4809	4.04155				8.79761	2.49363	5.04155					4.19642	4.97453	6.02078				3.79761	4.11068	6.76299
								9.08672	1.49315	7.02408				7.78229	2.9863	3.03612				8.08672	3.73288	3.56021				7.78229	2.47945	4.04817				8.78229	2.49315	5.04817					4.17343	4.97261	6.02408				3.78229	4.10959	6.76505
								9.07526	1.49267	7.02763				7.76702	2.98534	3.04145				8.07526	3.73168	3.56908				7.76702	2.47801	4.05526				8.76702	2.49267	5.05526					4.15052	4.97068	6.02763				3.76702	4.10851	6.76727
								9.06385	1.49219	7.03142				7.7518	2.98438	3.04713				8.06385	3.73048	3.57854				7.7518	2.47658	4.06283				8.7518	2.49219	5.06283					4.1277	4.96877	6.03142				3.7518	4.10743	6.76964
								9.05249	1.49172	7.03544				7.73665	2.98343	3.05316				8.05249	3.72929	3.58861				7.73665	2.47515	4.07089				8.73665	2.49172	5.07089					4.10497	4.96686	6.03544				3.73665	4.10636	6.77215
								9.04117	1.49124	7.03971				7.72156	2.98248	3.05956				8.04117	3.7281	3.59927				7.72156	2.47372	4.07941				8.72156	2.49124	5.07941					4.08234	4.96496	6.03971				3.72156	4.10529	6.77482
								9.0299	1.49077	7.04421				7.70654	2.98154	3.06631				8.0299	3.72692	3.61052				7.70654	2.47231	4.08841				8.70654	2.49077	5.08841					4.05981	4.96307	6.04421				3.70654	4.10423	6.77763
								9.01869	1.4903	7.04894				7.69159	2.9806	3.07342				8.01869	3.72575	3.62236				7.69159	2.47089	4.09789				8.69159	2.4903	5.09789					4.03739	4.96119	6.04894				3.69159	4.10317	6.78059
								9.00754	1.48983	7.05391				7.67672	2.97966	3.08087				8.00754	3.72458	3.63479				7.67672	2.46949	4.10783				8.67672	2.48983	5.10783					4.01508	4.95932	6.05391				3.67672	4.10212	6.7837
								8.99645	1.48937	7.05912				7.66193	2.97873	3.08868				7.99645	3.72341	3.6478				7.66193	2.4681	4.11824				8.66193	2.48937	5.11824					3.9929	4.95746	6.05912				3.66193	4.10107	6.78695
								8.98542	1.4889	7.06456				7.64722	2.97781	3.09683				7.98542	3.72226	3.66139				7.64722	2.46671	4.12911				8.64722	2.4889	5.12911					3.97083	4.95561	6.06456				3.64722	4.10003	6.79035
								8.97445	1.48844	7.07022				7.6326	2.97689	3.10534				7.97445	3.72111	3.67556				7.6326	2.46533	4.14045				8.6326	2.48844	5.14045					3.9489	4.95377	6.07022				3.6326	4.099	6.79389
								8.96355	1.48799	7.07612				7.61807	2.97597	3.11418				7.96355	3.71996	3.6903				7.61807	2.46396	4.15224				8.61807	2.48799	5.15224					3.92711	4.95194	6.07612				3.61807	4.09797	6.79758
								8.95273	1.48753	7.08225				7.60364	2.97506	3.12337				7.95273	3.71883	3.70561				7.60364	2.46259	4.16449				8.60364	2.48753	5.16449					3.90545	4.95013	6.08225				3.60364	4.09695	6.8014
								8.94197	1.48708	7.0886				7.5893	2.97416	3.1329				7.94197	3.7177	3.72149				7.5893	2.46124	4.17719				8.5893	2.48708	5.17719					3.88395	4.94832	6.0886				3.5893	4.09593	6.80537
								8.9313	1.48663	7.09517				7.57506	2.97327	3.14276				7.9313	3.71658	3.73793				7.57506	2.4599	4.19035				8.57506	2.48663	5.19035					3.86259	4.94653	6.09517				3.57506	4.09492	6.80948
								8.9207	1.48619	7.10197				7.56093	2.97238	3.15296				7.9207	3.71547	3.75493				7.56093	2.45856	4.20394				8.56093	2.48619	5.20394					3.84139	4.94475	6.10197				3.56093	4.09392	6.81373
								8.91018	1.48575	7.10899				7.54691	2.97149	3.16349				7.91018	3.71437	3.77248				7.54691	2.45724	4.21799				8.54691	2.48575	5.21799					3.82036	4.94299	6.10899				3.54691	4.09293	6.81812
								8.89975	1.48531	7.11623				7.53299	2.97062	3.17435				7.89975	3.71327	3.79059				7.53299	2.45593	4.23247				8.53299	2.48531	5.23247					3.79949	4.94124	6.11623				3.53299	4.09195	6.82265
								8.8894	1.48488	7.12369				7.5192	2.96975	3.18554				7.8894	3.71219	3.80923				7.5192	2.45463	4.24739				8.5192	2.48488	5.24739					3.7788	4.9395	6.12369				3.5192	4.09097	6.82731
								8.87914	1.48444	7.13137				7.50552	2.96889	3.19705				7.87914	3.71111	3.82842				7.50552	2.45333	4.26274				8.50552	2.48444	5.26274					3.75828	4.93778	6.13137				3.50552	4.09	6.83211
								8.86897	1.48402	7.13926				7.49196	2.96804	3.20889				7.86897	3.71005	3.84814				7.49196	2.45206	4.27852				8.49196	2.48402	5.27852					3.73794	4.93607	6.13926				3.49196	4.08904	6.83704
								8.8589	1.4836	7.14736				7.47853	2.96719	3.22104				7.8589	3.70899	3.8684				7.47853	2.45079	4.29472				8.47853	2.4836	5.29472					3.7178	4.93438	6.14736				3.47853	4.08809	6.8421
								8.84892	1.48318	7.15567				7.46523	2.96636	3.23351				7.84892	3.70794	3.88918				7.46523	2.44953	4.31134				8.46523	2.48318	5.31134					3.69785	4.93271	6.15567				3.46523	4.08715	6.8473
								8.83905	1.48276	7.16419				7.45206	2.96553	3.24629				7.83905	3.70691	3.91048				7.45206	2.44829	4.32839				8.45206	2.48276	5.32839					3.67809	4.93105	6.16419				3.45206	4.08622	6.85262
								8.82927	1.48235	7.17292				7.43903	2.96471	3.25938				7.82927	3.70588	3.9323				7.43903	2.44706	4.34584				8.43903	2.48235	5.34584					3.65854	4.92941	6.17292				3.43903	4.08529	6.85807
								8.8196	1.48195	7.18185				7.42613	2.9639	3.27278				7.8196	3.70487	3.95463				7.42613	2.44584	4.3637				8.42613	2.48195	5.3637					3.63919	4.92779	6.18185				3.42613	4.08438	6.86366
								8.81003	1.48155	7.19098				7.41337	2.96309	3.28647				7.81003	3.70387	3.97746				7.41337	2.44464	4.38197				8.41337	2.48155	5.38197					3.62006	4.92619	6.19098				3.41337	4.08348	6.86936
								8.80057	1.48115	7.20032				7.40076	2.9623	3.30047				7.80057	3.70287	4.00079				7.40076	2.44345	4.40063				8.40076	2.48115	5.40063					3.60115	4.9246	6.20032				3.40076	4.08259	6.8752
								8.79123	1.48076	7.20984				7.3883	2.96152	3.31477				7.79123	3.70189	4.02461				7.3883	2.44227	4.41969				8.3883	2.48076	5.41969					3.58245	4.92303	6.20984				3.3883	4.0817	6.88115
								8.78199	1.48037	7.21957				7.37599	2.96074	3.32935				7.78199	3.70093	4.04892				7.37599	2.44111	4.43914				8.37599	2.48037	5.43914					3.56399	4.92148	6.21957				3.37599	4.08083	6.88723
								8.77288	1.47999	7.22949				7.36383	2.95998	3.34423				7.77288	3.69997	4.07372				7.36383	2.43996	4.45897				8.36383	2.47999	5.45897					3.54575	4.91995	6.22949				3.36383	4.07997	6.89343
								8.76388	1.47961	7.23959				7.35183	2.95922	3.35939				7.76388	3.69903	4.09899				7.35183	2.43883	4.47919				8.35183	2.47961	5.47919					3.52775	4.91844	6.23959				3.35183	4.07912	6.89975
								8.75499	1.47924	7.24989				7.33999	2.95848	3.37483				7.75499	3.69809	4.12472				7.33999	2.43771	4.49978				8.33999	2.47924	5.49978					3.50999	4.91695	6.24989				3.33999	4.07829	6.90618
								8.74624	1.47887	7.26037				7.32832	2.95774	3.39055				7.74624	3.69718	4.15092				7.32832	2.43661	4.52074				8.32832	2.47887	5.52074					3.49247	4.91548	6.26037				3.32832	4.07746	6.91273
								8.7376	1.47851	7.27103				7.3168	2.95702	3.40655				7.7376	3.69627	4.17758				7.3168	2.43553	4.54206				8.3168	2.47851	5.54206					3.47521	4.91403	6.27103				3.3168	4.07664	6.91939
								8.7291	1.47815	7.28187				7.30546	2.9563	3.42281				7.7291	3.69538	4.20468				7.30546	2.43445	4.56375				8.30546	2.47815	5.56375					3.45819	4.91261	6.28187				3.30546	4.07584	6.92617
								8.72072	1.4778	7.29289				7.29429	2.9556	3.43934				7.72072	3.6945	4.23223				7.29429	2.4334	4.58579				8.29429	2.4778	5.58579					3.44143	4.9112	6.29289				3.29429	4.07505	6.93306
								8.71247	1.47745	7.30409				7.28329	2.95491	3.45613				7.71247	3.69364	4.26022				7.28329	2.43236	4.60817				8.28329	2.47745	5.60817					3.42494	4.90982	6.30409				3.28329	4.07427	6.94005
								8.70435	1.47711	7.31545				7.27247	2.95423	3.47318				7.70435	3.69278	4.28863				7.27247	2.43134	4.63091				8.27247	2.47711	5.63091					3.4087	4.90846	6.31545				3.27247	4.07351	6.94716
								8.69637	1.47678	7.32699				7.26183	2.95356	3.49048				7.69637	3.69195	4.31747				7.26183	2.43034	4.65397				8.26183	2.47678	5.65397					3.39274	4.90712	6.32699				3.26183	4.07275	6.95437
								8.68853	1.47645	7.33869				7.25137	2.9529	3.50803				7.68853	3.69113	4.34672				7.25137	2.42935	4.67738				8.25137	2.47645	5.67738					3.37705	4.9058	6.33869				3.25137	4.07201	6.96168
								8.68082	1.47613	7.35055				7.24109	2.95225	3.52583				7.68082	3.69032	4.37638				7.24109	2.42838	4.7011				8.24109	2.47613	5.7011					3.36164	4.90451	6.35055				3.24109	4.07129	6.96909
								8.67326	1.47581	7.36258				7.23101	2.95162	3.54386				7.67326	3.68952	4.40644				7.23101	2.42743	4.72515				8.23101	2.47581	5.72515					3.34651	4.90324	6.36258				3.23101	4.07057	6.97661
								8.66583	1.4755	7.37476				7.22111	2.951	3.56214				7.66583	3.68875	4.43689				7.22111	2.42649	4.74951				8.22111	2.4755	5.74951					3.33166	4.90199	6.37476				3.22111	4.06987	6.98422
								8.65855	1.47519	7.38709				7.2114	2.95039	3.58064				7.65855	3.68798	4.46773				7.2114	2.42558	4.77419				8.2114	2.47519	5.77419					3.31711	4.90077	6.38709				3.2114	4.06918	6.99193
								8.65142	1.47489	7.39958				7.20189	2.94979	3.59937				7.65142	3.68723	4.49895				7.20189	2.42468	4.79916				8.20189	2.47489	5.79916					3.30284	4.89957	6.39958				3.20189	4.06851	6.99974
								8.64443	1.4746	7.41221				7.19258	2.9492	3.61832				7.64443	3.6865	4.53054				7.19258	2.4238	4.82443				8.19258	2.4746	5.82443					3.28887	4.8984	6.41221				3.19258	4.06785	7.00763
								8.6376	1.47431	7.42499				7.18346	2.94863	3.63749				7.6376	3.68578	4.56249				7.18346	2.42294	4.84999				8.18346	2.47431	5.84999					3.2752	4.89726	6.42499				3.18346	4.06721	7.01562
								8.63091	1.47403	7.43792				7.17455	2.94807	3.65687				7.63091	3.68508	4.59479				7.17455	2.4221	4.87583				8.17455	2.47403	5.87583					3.26183	4.89613	6.43792				3.17455	4.06658	7.0237
								8.62438	1.47376	7.45098				7.16584	2.94752	3.67647				7.62438	3.6844	4.62744				7.16584	2.42128	4.90195				8.16584	2.47376	5.90195					3.24876	4.89504	6.45098				3.16584	4.06596	7.03186
								8.618	1.47349	7.46417				7.15734	2.94698	3.69626				7.618	3.68373	4.66043				7.15734	2.42048	4.92835				8.15734	2.47349	5.92835					3.23601	4.89397	6.46417				3.15734	4.06536	7.04011
								8.61178	1.47323	7.4775				7.14904	2.94646	3.71625				7.61178	3.68308	4.69375				7.14904	2.41969	4.955				8.14904	2.47323	5.955					3.22356	4.89292	6.4775				3.14904	4.06477	7.04844
								8.60572	1.47298	7.49096				7.14096	2.94595	3.73644				7.60572	3.68244	4.7274				7.14096	2.41893	4.98192				8.14096	2.47298	5.98192					3.21143	4.89191	6.49096				3.14096	4.0642	7.05685
								8.59981	1.47273	7.50454				7.13308	2.94546	3.75681				7.59981	3.68182	4.76135				7.13308	2.41819	5.00908				8.13308	2.47273	6.00908					3.19962	4.89092	6.50454				3.13308	4.06364	7.06534
								8.59407	1.47249	7.51825				7.12542	2.94498	3.77737				7.59407	3.68122	4.79562				7.12542	2.41746	5.03649				8.12542	2.47249	6.03649					3.18813	4.88995	6.51825				3.12542	4.0631	7.0739
								8.58848	1.47225	7.53207				7.11798	2.94451	3.79811				7.58848	3.68063	4.83018				7.11798	2.41676	5.06414				8.11798	2.47225	6.06414					3.17697	4.88902	6.53207				3.11798	4.06257	7.08254
								8.58306	1.47203	7.54601				7.11075	2.94405	3.81901				7.58306	3.68007	4.86502				7.11075	2.41608	5.09202				8.11075	2.47203	6.09202					3.16613	4.88811	6.54601				3.11075	4.06206	7.09126
								8.57781	1.47181	7.56006				7.10374	2.94361	3.84009				7.57781	3.67952	4.90015				7.10374	2.41542	5.12012				8.10374	2.47181	6.12012					3.15562	4.88722	6.56006				3.10374	4.06156	7.10004
								8.57272	1.47159	7.57422				7.09696	2.94319	3.86133				7.57272	3.67898	4.93555				7.09696	2.41478	5.14844				8.09696	2.47159	6.14844					3.14544	4.88637	6.57422				3.09696	4.06108	7.10889
								8.5678	1.47139	7.58849				7.0904	2.94277	3.88273				7.5678	3.67847	4.97121				7.0904	2.41416	5.17697				8.0904	2.47139	6.17697					3.13559	4.88555	6.58849				3.0904	4.06062	7.1178
								8.56304	1.47119	7.60285				7.08406	2.94237	3.90428				7.56304	3.67797	5.00713				7.08406	2.41356	5.2057				8.08406	2.47119	6.2057					3.12608	4.88475	6.60285				3.08406	4.06017	7.12678
								8.55846	1.47099	7.61732				7.07794	2.94199	3.92597				7.55846	3.67749	5.04329				7.07794	2.41298	5.23463				8.07794	2.47099	6.23463					3.11692	4.88398	6.61732				3.07794	4.05974	7.13582
								8.55404	1.47081	7.63188				7.07206	2.94162	3.94781				7.55404	3.67702	5.07969				7.07206	2.41243	5.26375				8.07206	2.47081	6.26375					3.10809	4.88324	6.63188				3.07206	4.05932	7.14492
								8.5498	1.47063	7.64653				7.0664	2.94126	3.96979				7.5498	3.67658	5.11631				7.0664	2.41189	5.29305				8.0664	2.47063	6.29305					3.0996	4.88253	6.64653				3.0664	4.05892	7.15408
								8.54573	1.47046	7.66126				7.06098	2.94092	3.99189				7.54573	3.67615	5.15316				7.06098	2.41138	5.32252				8.06098	2.47046	6.32252					3.09146	4.88184	6.66126				3.06098	4.05854	7.16329
								8.54184	1.4703	7.67608				7.05578	2.94059	4.01412				7.54184	3.67574	5.19021				7.05578	2.41089	5.35217				8.05578	2.4703	6.35217					3.08367	4.88119	6.67608				3.05578	4.05817	7.17255
								8.53812	1.47014	7.69098				7.05082	2.94028	4.03647				7.53812	3.67535	5.22746				7.05082	2.41042	5.38197				8.05082	2.47014	6.38197					3.07623	4.88057	6.69098				3.05082	4.05782	7.18186
								8.53457	1.46999	7.70596				7.04609	2.93999	4.05894				7.53457	3.67498	5.2649				7.04609	2.40998	5.41192				8.04609	2.46999	6.41192					3.06914	4.87997	6.70596				3.04609	4.05748	7.19122
								8.5312	1.46985	7.72101				7.0416	2.9397	4.08151				7.5312	3.67463	5.30252				7.0416	2.40955	5.44202				8.0416	2.46985	6.44202					3.0624	4.87941	6.72101				3.0416	4.05717	7.20063
								8.52801	1.46972	7.73613				7.03735	2.93943	4.10419				7.52801	3.67429	5.34032				7.03735	2.40915	5.47225				8.03735	2.46972	6.47225					3.05602	4.87887	6.73613				3.03735	4.05686	7.21008
								8.525	1.46959	7.75131				7.03333	2.93918	4.12697				7.525	3.67398	5.37828				7.03333	2.40877	5.50262				8.03333	2.46959	6.50262					3.04999	4.87836	6.75131				3.03333	4.05658	7.21957
								8.52216	1.46947	7.76655				7.02955	2.93894	4.14983				7.52216	3.67368	5.41639				7.02955	2.40842	5.53311				8.02955	2.46947	6.53311					3.04432	4.87789	6.76655				3.02955	4.05631	7.2291
								8.51951	1.46936	7.78186				7.02601	2.93872	4.17279				7.51951	3.6734	5.45464				7.02601	2.40808	5.56371				8.02601	2.46936	6.56371					3.03901	4.87744	6.78186				3.02601	4.05606	7.23866
								8.51703	1.46926	7.79721				7.02271	2.93851	4.19582				7.51703	3.67314	5.49303				7.02271	2.40777	5.59443				8.02271	2.46926	6.59443					3.03406	4.87703	6.79721				3.02271	4.05583	7.24826
								8.51474	1.46916	7.81262				7.01965	2.93832	4.21893				7.51474	3.6729	5.53155				7.01965	2.40748	5.62524				8.01965	2.46916	6.62524					3.02948	4.87664	6.81262				3.01965	4.05561	7.25789
								8.51263	1.46907	7.82807				7.01683	2.93814	4.24211				7.51263	3.67268	5.57018				7.01683	2.40722	5.65614				8.01683	2.46907	6.65614					3.02525	4.87629	6.82807				3.01683	4.05541	7.26754
								8.5107	1.46899	7.84357				7.01426	2.93798	4.26535				7.5107	3.67248	5.60891				7.01426	2.40697	5.68713				8.01426	2.46899	6.68713					3.02139	4.87597	6.84357				3.01426	4.05523	7.27723
								8.50895	1.46892	7.8591				7.01193	2.93784	4.28865				7.50895	3.67229	5.64775				7.01193	2.40675	5.7182				8.01193	2.46892	6.7182					3.01789	4.87567	6.8591				3.01193	4.05507	7.28694
								8.50738	1.46885	7.87467				7.00984	2.9377	4.312				7.50738	3.67213	5.68667				7.00984	2.40656	5.74933				8.00984	2.46885	6.74933					3.01476	4.87541	6.87467				3.00984	4.05492	7.29667
								8.506	1.46879	7.89027				7.008	2.93759	4.3354				7.506	3.67199	5.72566				7.008	2.40638	5.78053				8.008	2.46879	6.78053					3.012	4.87518	6.89027				3.008	4.05479	7.30642
								8.5048	1.46874	7.90589				7.0064	2.93749	4.35884				7.5048	3.67186	5.76473				7.0064	2.40623	5.81178				8.0064	2.46874	6.81178					3.0096	4.87498	6.90589				3.0064	4.05467	7.31618
								8.50379	1.4687	7.92154				7.00505	2.9374	4.38231				7.50379	3.67175	5.80385				7.00505	2.4061	5.84308				8.00505	2.4687	6.84308					3.00757	4.87481	6.92154				3.00505	4.05458	7.32596
								8.50296	1.46867	7.93721				7.00394	2.93733	4.40581				7.50296	3.67167	5.84302				7.00394	2.406	5.87442				8.00394	2.46867	6.87442					3.00591	4.87467	6.93721				3.00394	4.0545	7.33576
								8.50231	1.46864	7.95289				7.00308	2.93728	4.42934				7.50231	3.6716	5.88223				7.00308	2.40592	5.90579				8.00308	2.46864	6.90579					3.00462	4.87456	6.95289				3.00308	4.05444	7.34556
								8.50185	1.46862	7.96859				7.00247	2.93724	4.45288				7.50185	3.67155	5.92147				7.00247	2.40586	5.93718				8.00247	2.46862	6.93718					3.0037	4.87448	6.96859				3.00247	4.0544	7.35537
								8.50157	1.46861	7.98429				7.0021	2.93722	4.47644				7.50157	3.67152	5.96073				7.0021	2.40583	5.96859				8.0021	2.46861	6.96859					3.00314	4.87443	6.98429				3.0021	4.05437	7.36518
								8.50148	1.4686	8				7.00197	2.93721	4.5				7.50148	3.67151	6				7.00197	2.40581	6				8.00197	2.4686	7					3.00296	4.87442	7				3.00197	4.05436	7.375
								8.50157	1.46861	8.01571				7.0021	2.93722	4.52356				7.50157	3.67152	6.03927				7.0021	2.40583	6.03141				8.0021	2.46861	7.03141					3.00314	4.87443	7.01571				3.0021	4.05437	7.38482
								8.50185	1.46862	8.03141				7.00247	2.93724	4.54712				7.50185	3.67155	6.07853				7.00247	2.40586	6.06282				8.00247	2.46862	7.06282					3.0037	4.87448	7.03141				3.00247	4.0544	7.39463
								8.50231	1.46864	8.04711				7.00308	2.93728	4.57066				7.50231	3.6716	6.11777				7.00308	2.40592	6.09421				8.00308	2.46864	7.09421					3.00462	4.87456	7.04711				3.00308	4.05444	7.40444
								8.50296	1.46867	8.06279				7.00394	2.93733	4.59419				7.50296	3.67167	6.15698				7.00394	2.406	6.12558				8.00394	2.46867	7.12558					3.00591	4.87467	7.06279				3.00394	4.0545	7.41424
								8.50379	1.4687	8.07846				7.00505	2.9374	4.61769				7.50379	3.67175	6.19615				7.00505	2.4061	6.15692				8.00505	2.4687	7.15692					3.00757	4.87481	7.07846				3.00505	4.05458	7.42404
								8.5048	1.46874	8.09411				7.0064	2.93749	4.64116				7.5048	3.67186	6.23527				7.0064	2.40623	6.18822				8.0064	2.46874	7.18822					3.0096	4.87498	7.09411				3.0064	4.05467	7.43382
								8.506	1.46879	8.10973				7.008	2.93759	4.6646				7.506	3.67199	6.27434				7.008	2.40638	6.21947				8.008	2.46879	7.21947					3.012	4.87518	7.10973				3.008	4.05479	7.44358
								8.50738	1.46885	8.12533				7.00984	2.9377	4.688				7.50738	3.67213	6.31333				7.00984	2.40656	6.25067				8.00984	2.46885	7.25067					3.01476	4.87541	7.12533				3.00984	4.05492	7.45333
								8.50895	1.46892	8.1409				7.01193	2.93784	4.71135				7.50895	3.67229	6.35225				7.01193	2.40675	6.2818				8.01193	2.46892	7.2818					3.01789	4.87567	7.1409				3.01193	4.05507	7.46306
								8.5107	1.46899	8.15643				7.01426	2.93798	4.73465				7.5107	3.67248	6.39109				7.01426	2.40697	6.31287				8.01426	2.46899	7.31287					3.02139	4.87597	7.15643				3.01426	4.05523	7.47277
								8.51263	1.46907	8.17193				7.01683	2.93814	4.75789				7.51263	3.67268	6.42982				7.01683	2.40722	6.34386				8.01683	2.46907	7.34386					3.02525	4.87629	7.17193				3.01683	4.05541	7.48246
								8.51474	1.46916	8.18738				7.01965	2.93832	4.78107				7.51474	3.6729	6.46845				7.01965	2.40748	6.37476				8.01965	2.46916	7.37476					3.02948	4.87664	7.18738				3.01965	4.05561	7.49211
								8.51703	1.46926	8.20279				7.02271	2.93851	4.80418				7.51703	3.67314	6.50697				7.02271	2.40777	6.40557				8.02271	2.46926	7.40557					3.03406	4.87703	7.20279				3.02271	4.05583	7.50174
								8.51951	1.46936	8.21814				7.02601	2.93872	4.82721				7.51951	3.6734	6.54536				7.02601	2.40808	6.43629				8.02601	2.46936	7.43629					3.03901	4.87744	7.21814				3.02601	4.05606	7.51134
								8.52216	1.46947	8.23345				7.02955	2.93894	4.85017				7.52216	3.67368	6.58361				7.02955	2.40842	6.46689				8.02955	2.46947	7.46689					3.04432	4.87789	7.23345				3.02955	4.05631	7.5209
								8.525	1.46959	8.24869				7.03333	2.93918	4.87303				7.525	3.67398	6.62172				7.03333	2.40877	6.49738				8.03333	2.46959	7.49738					3.04999	4.87836	7.24869				3.03333	4.05658	7.53043
								8.52801	1.46972	8.26387				7.03735	2.93943	4.89581				7.52801	3.67429	6.65968				7.03735	2.40915	6.52775				8.03735	2.46972	7.52775					3.05602	4.87887	7.26387				3.03735	4.05686	7.53992
								8.5312	1.46985	8.27899				7.0416	2.9397	4.91849				7.5312	3.67463	6.69748				7.0416	2.40955	6.55798				8.0416	2.46985	7.55798					3.0624	4.87941	7.27899				3.0416	4.05717	7.54937
								8.53457	1.46999	8.29404				7.04609	2.93999	4.94106				7.53457	3.67498	6.7351				7.04609	2.40998	6.58808				8.04609	2.46999	7.58808					3.06914	4.87997	7.29404				3.04609	4.05748	7.55878
								8.53812	1.47014	8.30902				7.05082	2.94028	4.96353				7.53812	3.67535	6.77254				7.05082	2.41042	6.61803				8.05082	2.47014	7.61803					3.07623	4.88057	7.30902				3.05082	4.05782	7.56814
								8.54184	1.4703	8.32392				7.05578	2.94059	4.98588				7.54184	3.67574	6.80979				7.05578	2.41089	6.64783				8.05578	2.4703	7.64783					3.08367	4.88119	7.32392				3.05578	4.05817	7.57745
								8.54573	1.47046	8.33874				7.06098	2.94092	5.00811				7.54573	3.67615	6.84684				7.06098	2.41138	6.67748				8.06098	2.47046	7.67748					3.09146	4.88184	7.33874				3.06098	4.05854	7.58671
								8.5498	1.47063	8.35347				7.0664	2.94126	5.03021				7.5498	3.67658	6.88369				7.0664	2.41189	6.70695				8.0664	2.47063	7.70695					3.0996	4.88253	7.35347				3.0664	4.05892	7.59592
								8.55404	1.47081	8.36812				7.07206	2.94162	5.05219				7.55404	3.67702	6.92031				7.07206	2.41243	6.73625				8.07206	2.47081	7.73625					3.10809	4.88324	7.36812				3.07206	4.05932	7.60508
								8.55846	1.47099	8.38268				7.07794	2.94199	5.07403				7.55846	3.67749	6.95671				7.07794	2.41298	6.76537				8.07794	2.47099	7.76537					3.11692	4.88398	7.38268				3.07794	4.05974	7.61418
								8.56304	1.47119	8.39715				7.08406	2.94237	5.09572				7.56304	3.67797	6.99287				7.08406	2.41356	6.7943				8.08406	2.47119	7.7943					3.12608	4.88475	7.39715				3.08406	4.06017	7.62322
								8.5678	1.47139	8.41151				7.0904	2.94277	5.11727				7.5678	3.67847	7.02879				7.0904	2.41416	6.82303				8.0904	2.47139	7.82303					3.13559	4.88555	7.41151				3.0904	4.06062	7.6322
								8.57272	1.47159	8.42578				7.09696	2.94319	5.13867				7.57272	3.67898	7.06445				7.09696	2.41478	6.85156				8.09696	2.47159	7.85156					3.14544	4.88637	7.42578				3.09696	4.06108	7.64111
								8.57781	1.47181	8.43994				7.10374	2.94361	5.15991				7.57781	3.67952	7.09985				7.10374	2.41542	6.87988				8.10374	2.47181	7.87988					3.15562	4.88722	7.43994				3.10374	4.06156	7.64996
								8.58306	1.47203	8.45399				7.11075	2.94405	5.18099				7.58306	3.68007	7.13498				7.11075	2.41608	6.90798				8.11075	2.47203	7.90798					3.16613	4.88811	7.45399				3.11075	4.06206	7.65874
								8.58848	1.47225	8.46793				7.11798	2.94451	5.20189				7.58848	3.68063	7.16982				7.11798	2.41676	6.93586				8.11798	2.47225	7.93586					3.17697	4.88902	7.46793				3.11798	4.06257	7.66746
								8.59407	1.47249	8.48175				7.12542	2.94498	5.22263				7.59407	3.68122	7.20438				7.12542	2.41746	6.96351				8.12542	2.47249	7.96351					3.18813	4.88995	7.48175				3.12542	4.0631	7.6761
								8.59981	1.47273	8.49546				7.13308	2.94546	5.24319				7.59981	3.68182	7.23865				7.13308	2.41819	6.99092				8.13308	2.47273	7.99092					3.19962	4.89092	7.49546				3.13308	4.06364	7.68466
								8.60572	1.47298	8.50904				7.14096	2.94595	5.26356				7.60572	3.68244	7.2726				7.14096	2.41893	7.01808				8.14096	2.47298	8.01808					3.21143	4.89191	7.50904				3.14096	4.0642	7.69315
								8.61178	1.47323	8.5225				7.14904	2.94646	5.28375				7.61178	3.68308	7.30625				7.14904	2.41969	7.045				8.14904	2.47323	8.045					3.22356	4.89292	7.5225				3.14904	4.06477	7.70156
								8.618	1.47349	8.53583				7.15734	2.94698	5.30374				7.618	3.68373	7.33957				7.15734	2.42048	7.07165				8.15734	2.47349	8.07165					3.23601	4.89397	7.53583				3.15734	4.06536	7.70989
								8.62438	1.47376	8.54902				7.16584	2.94752	5.32353				7.62438	3.6844	7.37256				7.16584	2.42128	7.09805				8.16584	2.47376	8.09805					3.24876	4.89504	7.54902				3.16584	4.06596	7.71814
								8.63091	1.47403	8.56208				7.17455	2.94807	5.34313				7.63091	3.68508	7.40521				7.17455	2.4221	7.12417				8.17455	2.47403	8.12417					3.26183	4.89613	7.56208				3.17455	4.06658	7.7263
								8.6376	1.47431	8.57501				7.18346	2.94863	5.36251				7.6376	3.68578	7.43751				7.18346	2.42294	7.15001				8.18346	2.47431	8.15001					3.2752	4.89726	7.57501				3.18346	4.06721	7.73438
								8.64443	1.4746	8.58779				7.19258	2.9492	5.38168				7.64443	3.6865	7.46946				7.19258	2.4238	7.17557				8.19258	2.4746	8.17557					3.28887	4.8984	7.58779				3.19258	4.06785	7.74237
								8.65142	1.47489	8.60042				7.20189	2.94979	5.40063				7.65142	3.68723	7.50105				7.20189	2.42468	7.20084				8.20189	2.47489	8.20084					3.30284	4.89957	7.60042				3.20189	4.06851	7.75026
								8.65855	1.47519	8.61291				7.2114	2.95039	5.41936				7.65855	3.68798	7.53227				7.2114	2.42558	7.22581				8.2114	2.47519	8.22581					3.31711	4.90077	7.61291				3.2114	4.06918	7.75807
								8.66583	1.4755	8.62524				7.22111	2.951	5.43786				7.66583	3.68875	7.56311				7.22111	2.42649	7.25049				8.22111	2.4755	8.25049					3.33166	4.90199	7.62524				3.22111	4.06987	7.76578
								8.67326	1.47581	8.63742				7.23101	2.95162	5.45614				7.67326	3.68952	7.59356				7.23101	2.42743	7.27485				8.23101	2.47581	8.27485					3.34651	4.90324	7.63742				3.23101	4.07057	7.77339
								8.68082	1.47613	8.64945				7.24109	2.95225	5.47417				7.68082	3.69032	7.62362				7.24109	2.42838	7.2989				8.24109	2.47613	8.2989					3.36164	4.90451	7.64945				3.24109	4.07129	7.78091
								8.68853	1.47645	8.66131				7.25137	2.9529	5.49197				7.68853	3.69113	7.65328				7.25137	2.42935	7.32262				8.25137	2.47645	8.32262					3.37705	4.9058	7.66131				3.25137	4.07201	7.78832
								8.69637	1.47678	8.67301				7.26183	2.95356	5.50952				7.69637	3.69195	7.68253				7.26183	2.43034	7.34603				8.26183	2.47678	8.34603					3.39274	4.90712	7.67301				3.26183	4.07275	7.79563
								8.70435	1.47711	8.68455				7.27247	2.95423	5.52682				7.70435	3.69278	7.71137				7.27247	2.43134	7.36909				8.27247	2.47711	8.36909					3.4087	4.90846	7.68455				3.27247	4.07351	7.80284
								8.71247	1.47745	8.69591				7.28329	2.95491	5.54387				7.71247	3.69364	7.73978				7.28329	2.43236	7.39183				8.28329	2.47745	8.39183					3.42494	4.90982	7.69591				3.28329	4.07427	7.80995
								8.72072	1.4778	8.70711				7.29429	2.9556	5.56066				7.72072	3.6945	7.76777				7.29429	2.4334	7.41421				8.29429	2.4778	8.41421					3.44143	4.9112	7.70711				3.29429	4.07505	7.81694
								8.7291	1.47815	8.71813				7.30546	2.9563	5.57719				7.7291	3.69538	7.79532				7.30546	2.43445	7.43625				8.30546	2.47815	8.43625					3.45819	4.91261	7.71813				3.30546	4.07584	7.82383
								8.7376	1.47851	8.72897				7.3168	2.95702	5.59345				7.7376	3.69627	7.82242				7.3168	2.43553	7.45794				8.3168	2.47851	8.45794					3.47521	4.91403	7.72897				3.3168	4.07664	7.83061
								8.74624	1.47887	8.73963				7.32832	2.95774	5.60945				7.74624	3.69718	7.84908				7.32832	2.43661	7.47926				8.32832	2.47887	8.47926					3.49247	4.91548	7.73963				3.32832	4.07746	7.83727
								8.75499	1.47924	8.75011				7.33999	2.95848	5.62517				7.75499	3.69809	7.87528				7.33999	2.43771	7.50022				8.33999	2.47924	8.50022					3.50999	4.91695	7.75011				3.33999	4.07829	7.84382
								8.76388	1.47961	8.76041				7.35183	2.95922	5.64061				7.76388	3.69903	7.90101				7.35183	2.43883	7.52081				8.35183	2.47961	8.52081					3.52775	4.91844	7.76041				3.35183	4.07912	7.85025
								8.77288	1.47999	8.77051				7.36383	2.95998	5.65577				7.77288	3.69997	7.92628				7.36383	2.43996	7.54103				8.36383	2.47999	8.54103					3.54575	4.91995	7.77051				3.36383	4.07997	7.85657
								8.78199	1.48037	8.78043				7.37599	2.96074	5.67065				7.78199	3.70093	7.95108				7.37599	2.44111	7.56086				8.37599	2.48037	8.56086					3.56399	4.92148	7.78043				3.37599	4.08083	7.86277
								8.79123	1.48076	8.79016				7.3883	2.96152	5.68523				7.79123	3.70189	7.97539				7.3883	2.44227	7.58031				8.3883	2.48076	8.58031					3.58245	4.92303	7.79016				3.3883	4.0817	7.86885
								8.80057	1.48115	8.79968				7.40076	2.9623	5.69953				7.80057	3.70287	7.99921				7.40076	2.44345	7.59937				8.40076	2.48115	8.59937					3.60115	4.9246	7.79968				3.40076	4.08259	7.8748
								8.81003	1.48155	8.80902				7.41337	2.96309	5.71353				7.81003	3.70387	8.02254				7.41337	2.44464	7.61803				8.41337	2.48155	8.61803					3.62006	4.92619	7.80902				3.41337	4.08348	7.88064
								8.8196	1.48195	8.81815				7.42613	2.9639	5.72722				7.8196	3.70487	8.04537				7.42613	2.44584	7.6363				8.42613	2.48195	8.6363					3.63919	4.92779	7.81815				3.42613	4.08438	7.88634
								8.82927	1.48235	8.82708				7.43903	2.96471	5.74062				7.82927	3.70588	8.0677				7.43903	2.44706	7.65416				8.43903	2.48235	8.65416					3.65854	4.92941	7.82708				3.43903	4.08529	7.89193
								8.83905	1.48276	8.83581				7.45206	2.96553	5.75371				7.83905	3.70691	8.08952				7.45206	2.44829	7.67161				8.45206	2.48276	8.67161					3.67809	4.93105	7.83581				3.45206	4.08622	7.89738
								8.84892	1.48318	8.84433				7.46523	2.96636	5.76649				7.84892	3.70794	8.11082				7.46523	2.44953	7.68866				8.46523	2.48318	8.68866					3.69785	4.93271	7.84433				3.46523	4.08715	7.9027
								8.8589	1.4836	8.85264				7.47853	2.96719	5.77896				7.8589	3.70899	8.1316				7.47853	2.45079	7.70528				8.47853	2.4836	8.70528					3.7178	4.93438	7.85264				3.47853	4.08809	7.9079
								8.86897	1.48402	8.86074				7.49196	2.96804	5.79111				7.86897	3.71005	8.15186				7.49196	2.45206	7.72148				8.49196	2.48402	8.72148					3.73794	4.93607	7.86074				3.49196	4.08904	7.91296
								8.87914	1.48444	8.86863				7.50552	2.96889	5.80295				7.87914	3.71111	8.17158				7.50552	2.45333	7.73726				8.50552	2.48444	8.73726					3.75828	4.93778	7.86863				3.50552	4.09	7.91789
								8.8894	1.48488	8.87631				7.5192	2.96975	5.81446				7.8894	3.71219	8.19077				7.5192	2.45463	7.75261				8.5192	2.48488	8.75261					3.7788	4.9395	7.87631				3.5192	4.09097	7.92269
								8.89975	1.48531	8.88377				7.53299	2.97062	5.82565				7.89975	3.71327	8.20941				7.53299	2.45593	7.76753				8.53299	2.48531	8.76753					3.79949	4.94124	7.88377				3.53299	4.09195	7.92735
								8.91018	1.48575	8.89101				7.54691	2.97149	5.83651				7.91018	3.71437	8.22752				7.54691	2.45724	7.78201				8.54691	2.48575	8.78201					3.82036	4.94299	7.89101				3.54691	4.09293	7.93188
								8.9207	1.48619	8.89803				7.56093	2.97238	5.84704				7.9207	3.71547	8.24507				7.56093	2.45856	7.79606				8.56093	2.48619	8.79606					3.84139	4.94475	7.89803				3.56093	4.09392	7.93627
								8.9313	1.48663	8.90483				7.57506	2.97327	5.85724				7.9313	3.71658	8.26207				7.57506	2.4599	7.80965				8.57506	2.48663	8.80965					3.86259	4.94653	7.90483				3.57506	4.09492	7.94052
								8.94197	1.48708	8.9114				7.5893	2.97416	5.8671				7.94197	3.7177	8.27851				7.5893	2.46124	7.82281				8.5893	2.48708	8.82281					3.88395	4.94832	7.9114				3.5893	4.09593	7.94463
								8.95273	1.48753	8.91775				7.60364	2.97506	5.87663				7.95273	3.71883	8.29439				7.60364	2.46259	7.83551				8.60364	2.48753	8.83551					3.90545	4.95013	7.91775				3.60364	4.09695	7.9486
								8.96355	1.48799	8.92388				7.61807	2.97597	5.88582				7.96355	3.71996	8.3097				7.61807	2.46396	7.84776				8.61807	2.48799	8.84776					3.92711	4.95194	7.92388				3.61807	4.09797	7.95242
								8.97445	1.48844	8.92978				7.6326	2.97689	5.89466				7.97445	3.72111	8.32444				7.6326	2.46533	7.85955				8.6326	2.48844	8.85955					3.9489	4.95377	7.92978				3.6326	4.099	7.95611
								8.98542	1.4889	8.93544				7.64722	2.97781	5.90317				7.98542	3.72226	8.33861				7.64722	2.46671	7.87089				8.64722	2.4889	8.87089					3.97083	4.95561	7.93544				3.64722	4.10003	7.95965
								8.99645	1.48937	8.94088				7.66193	2.97873	5.91132				7.99645	3.72341	8.3522				7.66193	2.4681	7.88176				8.66193	2.48937	8.88176					3.9929	4.95746	7.94088				3.66193	4.10107	7.96305
								9.00754	1.48983	8.94609				7.67672	2.97966	5.91913				8.00754	3.72458	8.36521				7.67672	2.46949	7.89217				8.67672	2.48983	8.89217					4.01508	4.95932	7.94609				3.67672	4.10212	7.9663
								9.01869	1.4903	8.95106				7.69159	2.9806	5.92658				8.01869	3.72575	8.37764				7.69159	2.47089	7.90211				8.69159	2.4903	8.90211					4.03739	4.96119	7.95106				3.69159	4.10317	7.96941
								9.0299	1.49077	8.95579				7.70654	2.98154	5.93369				8.0299	3.72692	8.38948				7.70654	2.47231	7.91159				8.70654	2.49077	8.91159					4.05981	4.96307	7.95579				3.70654	4.10423	7.97237
								9.04117	1.49124	8.96029				7.72156	2.98248	5.94044				8.04117	3.7281	8.40073				7.72156	2.47372	7.92059				8.72156	2.49124	8.92059					4.08234	4.96496	7.96029				3.72156	4.10529	7.97518
								9.05249	1.49172	8.96456				7.73665	2.98343	5.94684				8.05249	3.72929	8.41139				7.73665	2.47515	7.92911				8.73665	2.49172	8.92911					4.10497	4.96686	7.96456				3.73665	4.10636	7.97785
								9.06385	1.49219	8.96858				7.7518	2.98438	5.95287				8.06385	3.73048	8.42146				7.7518	2.47658	7.93717				8.7518	2.49219	8.93717					4.1277	4.96877	7.96858				3.7518	4.10743	7.98036
								9.07526	1.49267	8.97237				7.76702	2.98534	5.95855				8.07526	3.73168	8.43092				7.76702	2.47801	7.94474				8.76702	2.49267	8.94474					4.15052	4.97068	7.97237				3.76702	4.10851	7.98273
								9.08672	1.49315	8.97592				7.78229	2.9863	5.96388				8.08672	3.73288	8.43979				7.78229	2.47945	7.95183				8.78229	2.49315	8.95183					4.17343	4.97261	7.97592				3.78229	4.10959	7.98495
								9.09821	1.49363	8.97922				7.79761	2.98727	5.96883				8.09821	3.73408	8.44806				7.79761	2.4809	7.95845				8.79761	2.49363	8.95845					4.19642	4.97453	7.97922				3.79761	4.11068	7.98701
								9.10974	1.49412	8.98229				7.81299	2.98823	5.97343				8.10974	3.73529	8.45572				7.81299	2.48235	7.96457				8.81299	2.49412	8.96457					4.21948	4.97647	7.98229				3.81299	4.11176	7.98893
								9.12131	1.4946	8.98511				7.82841	2.9892	5.97766				8.12131	3.73651	8.46277				7.82841	2.48381	7.97022				8.82841	2.4946	8.97022					4.24262	4.97841	7.98511				3.82841	4.11286	7.99069
								9.13291	1.49509	8.98769				7.84387	2.99018	5.98153				8.13291	3.73772	8.46922				7.84387	2.48527	7.97538				8.84387	2.49509	8.97538					4.26581	4.98035	7.98769				3.84387	4.11395	7.99231
								9.14453	1.49558	8.99002				7.85938	2.99115	5.98504				8.14453	3.73894	8.47506				7.85938	2.48673	7.98005				8.85938	2.49558	8.98005					4.28907	4.98231	7.99002				3.85938	4.11505	7.99376
								9.15619	1.49607	8.99211				7.87491	2.99213	5.98817				8.15619	3.74016	8.48029				7.87491	2.4882	7.98423				8.87491	2.49607	8.98423					4.31237	4.98426	7.99211				3.87491	4.11615	7.99507
								9.16786	1.49655	8.99396				7.89048	2.99311	5.99094				8.16786	3.74139	8.4849				7.89048	2.48966	7.98792				8.89048	2.49655	8.98792					4.33572	4.98622	7.99396				3.89048	4.11725	7.99623
								9.17956	1.49705	8.99556				7.90608	2.99409	5.99334				8.17956	3.74261	8.4889				7.90608	2.49114	7.99112				8.90608	2.49705	8.99112					4.35912	4.98818	7.99556				3.90608	4.11835	7.99723
								9.19127	1.49754	8.99692				7.9217	2.99507	5.99538				8.19127	3.74384	8.49229				7.9217	2.49261	7.99383				8.9217	2.49754	8.99383					4.38254	4.99015	7.99692				3.9217	4.11946	7.99807
								9.203	1.49803	8.99803				7.93733	2.99606	5.99704				8.203	3.74507	8.49507				7.93733	2.49409	7.99605				8.93733	2.49803	8.99605					4.406	4.99211	7.99803				3.93733	4.12056	7.99877
								9.21474	1.49852	8.99889				7.95299	2.99704	5.99833				8.21474	3.7463	8.49722				7.95299	2.49556	7.99778				8.95299	2.49852	8.99778					4.42948	4.99408	7.99889				3.95299	4.12167	7.99931
								9.22649	1.49901	8.99951				7.96865	2.99803	5.99926				8.22649	3.74753	8.49877				7.96865	2.49704	7.99901				8.96865	2.49901	8.99901					4.45298	4.99606	7.99951				3.96865	4.12278	7.99969
								9.23824	1.49951	8.99988				7.98432	2.99901	5.99981				8.23824	3.74877	8.49969				7.98432	2.49852	7.99975				8.98432	2.49951	8.99975					4.47649	4.99803	7.99988				3.98432	4.12389	7.99992
								9.25	1.5	9				8	3	6				8.25	3.75	8.5				8	2.5	8				9	2.5	9					4.5	5	8				4	4.125	8
								9.25	1.5	7				8	3	3				8.25	3.75	3.5				8	2.5	4				9	2.5	5					4.5	5	6				4	4.125	6.75
								9.23827	1.49926	7.00012				7.98436	2.99852	3.00019				8.23827	3.74815	3.50031				7.98436	2.49778	4.00025				8.98436	2.49926	5.00025					4.47654	4.99704	6.00012				3.98436	4.12334	6.75008
								9.22655	1.49852	7.00049				7.96873	2.99704	3.00074				8.22655	3.7463	3.50123				7.96873	2.49557	4.00099				8.96873	2.49852	5.00099					4.45309	4.99409	6.00049				3.96873	4.12167	6.75031
								9.21483	1.49778	7.00111				7.9531	2.99557	3.00167				8.21483	3.74446	3.50278				7.9531	2.49335	4.00222				8.9531	2.49778	5.00222					4.42965	4.99113	6.00111				3.9531	4.12001	6.75069
								9.20312	1.49705	7.00197				7.93749	2.99409	3.00296				8.20312	3.74261	3.50493				7.93749	2.49114	4.00395				8.93749	2.49705	5.00395					4.40623	4.98818	6.00197				3.93749	4.11835	6.75123
								9.19142	1.49631	7.00308				7.92189	2.99262	3.00462				8.19142	3.74077	3.50771				7.92189	2.48892	4.00617				8.92189	2.49631	5.00617					4.38283	4.98523	6.00308				3.92189	4.11669	6.75193
								9.17973	1.49557	7.00444				7.90631	2.99114	3.00666				8.17973	3.73893	3.5111				7.90631	2.48672	4.00888				8.90631	2.49557	5.00888					4.35946	4.98229	6.00444				3.90631	4.11504	6.75277
								9.16806	1.49484	7.00604				7.89075	2.98967	3.00906				8.16806	3.73709	3.5151				7.89075	2.48451	4.01208				8.89075	2.49484	5.01208					4.33613	4.97935	6.00604				3.89075	4.11338	6.75377
								9.15642	1.4941	7.00789				7.87522	2.98821	3.01183				8.15642	3.73526	3.51971				7.87522	2.48231	4.01577				8.87522	2.4941	5.01577					4.31283	4.97641	6.00789				3.87522	4.11173	6.75493
								9.14479	1.49337	7.00998				7.85972	2.98674	3.01496				8.14479	3.73343	3.52494				7.85972	2.48011	4.01995				8.85972	2.49337	5.01995					4.28959	4.97348	6.00998				3.85972	4.11008	6.75624
								9.13319	1.49264	7.01231				7.84426	2.98528	3.01847				8.13319	3.7316	3.53078				7.84426	2.47792	4.02462				8.84426	2.49264	5.02462					4.26639	4.97056	6.01231				3.84426	4.10844	6.75769
								9.12163	1.49191	7.01489				7.82883	2.98382	3.02234				8.12163	3.72978	3.53723				7.82883	2.47573	4.02978				8.82883	2.49191	5.02978					4.24325	4.96764	6.01489				3.82883	4.1068	6.75931
								9.11009	1.49118	7.01771				7.81345	2.98237	3.02657				8.11009	3.72796	3.54428				7.81345	2.47355	4.03543				8.81345	2.49118	5.03543					4.22018	4.96473	6.01771				3.81345	4.10516	6.76107
								9.09858	1.49046	7.02078				7.79811	2.98092	3.03117				8.09858	3.72615	3.55194				7.79811	2.47137	4.04155				8.79811	2.49046	5.04155					4.19717	4.96183	6.02078				3.79811	4.10353	6.76299
								9.08712	1.48974	7.02408				7.78282	2.97947	3.03612				8.08712	3.72434	3.56021				7.78282	2.46921	4.04817				8.78282	2.48974	5.04817					4.17424	4.95894	6.02408				3.78282	4.1019	6.76505
								9.07569	1.48902	7.02763				7.76759	2.97803	3.04145				8.07569	3.72254	3.56908				7.76759	2.46705	4.05526				8.76759	2.48902	5.05526					4.15139	4.95606	6.02763				3.76759	4.10028	6.76727
								9.06431	1.4883	7.03142				7.75241	2.9766	3.04713				8.06431	3.72075	3.57854				7.75241	2.46489	4.06283				8.75241	2.4883	5.06283					4.12862	4.95319	6.03142				3.75241	4.09867	6.76964
								9.05297	1.48758	7.03544				7.7373	2.97517	3.05316				8.05297	3.71896	3.58861				7.7373	2.46275	4.07089				8.7373	2.48758	5.07089					4.10595	4.95033	6.03544				3.7373	4.09706	6.77215
								9.04169	1.48687	7.03971				7.72225	2.97374	3.05956				8.04169	3.71718	3.59927				7.72225	2.46062	4.07941				8.72225	2.48687	5.07941					4.08337	4.94749	6.03971				3.72225	4.09546	6.77482
								9.03045	1.48616	7.04421				7.70726	2.97233	3.06631				8.03045	3.71541	3.61052				7.70726	2.45849	4.08841				8.70726	2.48616	5.08841					4.0609	4.94466	6.04421				3.70726	4.09387	6.77763
								9.01927	1.48546	7.04894				7.69235	2.97092	3.07342				8.01927	3.71365	3.62236				7.69235	2.45638	4.09789				8.69235	2.48546	5.09789					4.03853	4.94184	6.04894				3.69235	4.09228	6.78059
								9.00814	1.48476	7.05391				7.67752	2.96952	3.08087				8.00814	3.7119	3.63479				7.67752	2.45428	4.10783				8.67752	2.48476	5.10783					4.01628	4.93903	6.05391				3.67752	4.09071	6.7837
								8.99707	1.48406	7.05912				7.66277	2.96812	3.08868				7.99707	3.71015	3.6478				7.66277	2.45218	4.11824				8.66277	2.48406	5.11824					3.99415	4.93624	6.05912				3.66277	4.08914	6.78695
								8.98607	1.48337	7.06456				7.64809	2.96674	3.09683				7.98607	3.70842	3.66139				7.64809	2.4501	4.12911				8.64809	2.48337	5.12911					3.97214	4.93347	6.06456				3.64809	4.08758	6.79035
								8.97513	1.48268	7.07022				7.63351	2.96536	3.10534				7.97513	3.7067	3.67556				7.63351	2.44803	4.14045				8.63351	2.48268	5.14045					3.95026	4.93071	6.07022				3.63351	4.08603	6.79389
								8.96426	1.48199	7.07612				7.61901	2.96399	3.11418				7.96426	3.70498	3.6903				7.61901	2.44598	4.15224				8.61901	2.48199	5.15224					3.92852	4.92797	6.07612				3.61901	4.08448	6.79758
								8.95346	1.48131	7.08225				7.60461	2.96263	3.12337				7.95346	3.70328	3.70561				7.60461	2.44394	4.16449				8.60461	2.48131	5.16449					3.90692	4.92525	6.08225				3.60461	4.08295	6.8014
								8.94273	1.48064	7.0886				7.59031	2.96127	3.1329				7.94273	3.70159	3.72149				7.59031	2.44191	4.17719				8.59031	2.48064	5.17719					3.88547	4.92255	6.0886				3.59031	4.08143	6.80537
								8.93208	1.47997	7.09517				7.57611	2.95993	3.14276				7.93208	3.69991	3.73793				7.57611	2.4399	4.19035				8.57611	2.47997	5.19035					3.86417	4.91986	6.09517				3.57611	4.07992	6.80948
								8.92151	1.4793	7.10197				7.56201	2.9586	3.15296				7.92151	3.69825	3.75493				7.56201	2.4379	4.20394				8.56201	2.4793	5.20394					3.84302	4.9172	6.10197				3.56201	4.07842	6.81373
								8.91102	1.47864	7.10899				7.54802	2.95728	3.16349				7.91102	3.69659	3.77248				7.54802	2.43591	4.21799				8.54802	2.47864	5.21799					3.82204	4.91455	6.10899				3.54802	4.07694	6.81812
								8.90061	1.47798	7.11623				7.53415	2.95596	3.17435				7.90061	3.69495	3.79059				7.53415	2.43395	4.23247				8.53415	2.47798	5.23247					3.80122	4.91193	6.11623				3.53415	4.07546	6.82265
								8.89029	1.47733	7.12369				7.52038	2.95466	3.18554				7.89029	3.69333	3.80923				7.52038	2.43199	4.24739				8.52038	2.47733	5.24739					3.78058	4.90933	6.12369				3.52038	4.074	6.82731
								8.88006	1.47669	7.13137				7.50674	2.95337	3.19705				7.88006	3.69172	3.82842				7.50674	2.43006	4.26274				8.50674	2.47669	5.26274					3.76011	4.90675	6.13137				3.50674	4.07254	6.83211
								8.86991	1.47605	7.13926				7.49322	2.95209	3.20889				7.86991	3.69012	3.84814				7.49322	2.42814	4.27852				8.49322	2.47605	5.27852					3.73983	4.90419	6.13926				3.49322	4.07111	6.83704
								8.85987	1.47541	7.14736				7.47982	2.95083	3.22104				7.85987	3.68854	3.8684				7.47982	2.42624	4.29472				8.47982	2.47541	5.29472					3.71973	4.90166	6.14736				3.47982	4.06968	6.8421
								8.84991	1.47479	7.15567				7.46655	2.94957	3.23351				7.84991	3.68697	3.88918				7.46655	2.42436	4.31134				8.46655	2.47479	5.31134					3.69983	4.89915	6.15567				3.46655	4.06827	6.8473
								8.84006	1.47417	7.16419				7.45341	2.94833	3.24629				7.84006	3.68542	3.91048				7.45341	2.4225	4.32839				8.45341	2.47417	5.32839					3.68012	4.89666	6.16419				3.45341	4.06687	6.85262
								8.83031	1.47355	7.17292				7.44041	2.9471	3.25938				7.83031	3.68388	3.9323				7.44041	2.42065	4.34584				8.44041	2.47355	5.34584					3.66062	4.89421	6.17292				3.44041	4.06549	6.85807
								8.82066	1.47294	7.18185				7.42755	2.94589	3.27278				7.82066	3.68236	3.95463				7.42755	2.41883	4.3637				8.42755	2.47294	5.3637					3.64132	4.89177	6.18185				3.42755	4.06412	6.86366
								8.81112	1.47234	7.19098				7.41482	2.94468	3.28647				7.81112	3.68086	3.97746				7.41482	2.41703	4.38197				8.41482	2.47234	5.38197					3.62224	4.88937	6.19098				3.41482	4.06277	6.86936
								8.80168	1.47175	7.20032				7.40224	2.9435	3.30047				7.80168	3.67937	4.00079				7.40224	2.41524	4.40063				8.40224	2.47175	5.40063					3.60337	4.88699	6.20032				3.40224	4.06143	6.8752
								8.79236	1.47116	7.20984				7.38981	2.94232	3.31477				7.79236	3.6779	4.02461				7.38981	2.41348	4.41969				8.38981	2.47116	5.41969					3.58472	4.88464	6.20984				3.38981	4.06011	6.88115
								8.78315	1.47058	7.21957				7.37753	2.94116	3.32935				7.78315	3.67645	4.04892				7.37753	2.41174	4.43914				8.37753	2.47058	5.43914					3.5663	4.88232	6.21957				3.37753	4.0588	6.88723
								8.77405	1.47001	7.22949				7.3654	2.94001	3.34423				7.77405	3.67502	4.07372				7.3654	2.41002	4.45897				8.3654	2.47001	5.45897					3.54811	4.88003	6.22949				3.3654	4.05751	6.89343
								8.76508	1.46944	7.23959				7.35343	2.93888	3.35939				7.76508	3.6736	4.09899				7.35343	2.40832	4.47919				8.35343	2.46944	5.47919					3.53015	4.87776	6.23959				3.35343	4.05624	6.89975
								8.75622	1.46888	7.24989				7.34162	2.93777	3.37483				7.75622	3.67221	4.12472				7.34162	2.40665	4.49978				8.34162	2.46888	5.49978					3.51243	4.87553	6.24989				3.34162	4.05499	6.90618
								8.74748	1.46833	7.26037				7.32997	2.93666	3.39055				7.74748	3.67083	4.15092				7.32997	2.405	4.52074				8.32997	2.46833	5.52074					3.49496	4.87333	6.26037				3.32997	4.05375	6.91273
								8.73887	1.46779	7.27103				7.31849	2.93558	3.40655				7.73887	3.66947	4.17758				7.31849	2.40337	4.54206				8.31849	2.46779	5.54206					3.47774	4.87116	6.27103				3.31849	4.05253	6.91939
								8.73038	1.46725	7.28187				7.30718	2.93451	3.42281				7.73038	3.66814	4.20468				7.30718	2.40176	4.56375				8.30718	2.46725	5.56375					3.46076	4.86902	6.28187				3.30718	4.05132	6.92617
								8.72202	1.46673	7.29289				7.29603	2.93346	3.43934				7.72202	3.66682	4.23223				7.29603	2.40018	4.58579				8.29603	2.46673	5.58579					3.44405	4.86691	6.29289				3.29603	4.05014	6.93306
								8.7138	1.46621	7.30409				7.28506	2.93242	3.45613				7.7138	3.66552	4.26022				7.28506	2.39863	4.60817				8.28506	2.46621	5.60817					3.42759	4.86484	6.30409				3.28506	4.04897	6.94005
								8.7057	1.4657	7.31545				7.27427	2.9314	3.47318				7.7057	3.66425	4.28863				7.27427	2.3971	4.63091				8.27427	2.4657	5.63091					3.4114	4.8628	6.31545				3.27427	4.04782	6.94716
								8.69774	1.4652	7.32699				7.26365	2.93039	3.49048				7.69774	3.66299	4.31747				7.26365	2.39559	4.65397				8.26365	2.4652	5.65397					3.39548	4.86079	6.32699				3.26365	4.04669	6.95437
								8.68991	1.4647	7.33869				7.25322	2.92941	3.50803				7.68991	3.66176	4.34672				7.25322	2.39411	4.67738				8.25322	2.4647	5.67738					3.37983	4.85882	6.33869				3.25322	4.04558	6.96168
								8.68223	1.46422	7.35055				7.24297	2.92844	3.52583				7.68223	3.66055	4.37638				7.24297	2.39266	4.7011				8.24297	2.46422	5.7011					3.36445	4.85688	6.35055				3.24297	4.04449	6.96909
								8.67468	1.46374	7.36258				7.23291	2.92749	3.54386				7.67468	3.65936	4.40644				7.23291	2.39123	4.72515				8.23291	2.46374	5.72515					3.34936	4.85498	6.36258				3.23291	4.04342	6.97661
								8.66727	1.46328	7.37476				7.22303	2.92656	3.56214				7.66727	3.65819	4.43689				7.22303	2.38983	4.74951				8.22303	2.46328	5.74951					3.33455	4.85311	6.37476				3.22303	4.04237	6.98422
								8.66001	1.46282	7.38709				7.21335	2.92564	3.58064				7.66001	3.65705	4.46773				7.21335	2.38846	4.77419				8.21335	2.46282	5.77419					3.32003	4.85128	6.38709				3.21335	4.04134	6.99193
								8.6529	1.46237	7.39958				7.20386	2.92474	3.59937				7.6529	3.65593	4.49895				7.20386	2.38711	4.79916				8.20386	2.46237	5.79916					3.3058	4.84949	6.39958				3.20386	4.04034	6.99974
								8.64593	1.46193	7.41221				7.19457	2.92386	3.61832				7.64593	3.65483	4.53054				7.19457	2.3858	4.82443				8.19457	2.46193	5.82443					3.29186	4.84773	6.41221				3.19457	4.03935	7.00763
								8.63911	1.4615	7.42499				7.18548	2.92301	3.63749				7.63911	3.65376	4.56249				7.18548	2.38451	4.84999				8.18548	2.4615	5.84999					3.27822	4.84601	6.42499				3.18548	4.03838	7.01562
								8.63244	1.46108	7.43792				7.17659	2.92216	3.65687				7.63244	3.65271	4.59479				7.17659	2.38325	4.87583				8.17659	2.46108	5.87583					3.26489	4.84433	6.43792				3.17659	4.03744	7.0237
								8.62593	1.46067	7.45098				7.1679	2.92134	3.67647				7.62593	3.65168	4.62744				7.1679	2.38202	4.90195				8.1679	2.46067	5.90195					3.25185	4.84269	6.45098				3.1679	4.03651	7.03186
								8.61956	1.46027	7.46417				7.15942	2.92054	3.69626				7.61956	3.65068	4.66043				7.15942	2.38081	4.92835				8.15942	2.46027	5.92835					3.23913	4.84108	6.46417				3.15942	4.03561	7.04011
								8.61336	1.45988	7.4775				7.15114	2.91976	3.71625				7.61336	3.6497	4.69375				7.15114	2.37964	4.955				8.15114	2.45988	5.955					3.22672	4.83952	6.4775				3.15114	4.03473	7.04844
								8.60731	1.4595	7.49096				7.14308	2.919	3.73644				7.60731	3.64875	4.7274				7.14308	2.3785	4.98192				8.14308	2.4595	5.98192					3.21462	4.83799	6.49096				3.14308	4.03387	7.05685
								8.60142	1.45913	7.50454				7.13522	2.91825	3.75681				7.60142	3.64782	4.76135				7.13522	2.37738	5.00908				8.13522	2.45913	6.00908					3.20284	4.83651	6.50454				3.13522	4.03304	7.06534
								8.59569	1.45877	7.51825				7.12758	2.91753	3.77737				7.59569	3.64692	4.79562				7.12758	2.3763	5.03649				8.12758	2.45877	6.03649					3.19137	4.83506	6.51825				3.12758	4.03222	7.0739
								8.59012	1.45842	7.53207				7.12016	2.91683	3.79811				7.59012	3.64604	4.83018				7.12016	2.37525	5.06414				8.12016	2.45842	6.06414					3.18023	4.83366	6.53207				3.12016	4.03143	7.08254
								8.58471	1.45807	7.54601				7.11295	2.91615	3.81901				7.58471	3.64519	4.86502				7.11295	2.37422	5.09202				8.11295	2.45807	6.09202					3.16942	4.8323	6.54601				3.11295	4.03067	7.09126
								8.57947	1.45774	7.56006				7.10596	2.91549	3.84009				7.57947	3.64436	4.90015				7.10596	2.37323	5.12012				8.10596	2.45774	6.12012					3.15894	4.83098	6.56006				3.10596	4.02992	7.10004
								8.57439	1.45742	7.57422				7.09919	2.91485	3.86133				7.57439	3.64356	4.93555				7.09919	2.37227	5.14844				8.09919	2.45742	6.14844					3.14878	4.8297	6.57422				3.09919	4.0292	7.10889
								8.56948	1.45711	7.58849				7.09264	2.91423	3.88273				7.56948	3.64279	4.97121				7.09264	2.37134	5.17697				8.09264	2.45711	6.17697					3.13896	4.82846	6.58849				3.09264	4.02851	7.1178
								8.56474	1.45682	7.60285				7.08632	2.91363	3.90428				7.56474	3.64204	5.00713				7.08632	2.37045	5.2057				8.08632	2.45682	6.2057					3.12948	4.82726	6.60285				3.08632	4.02784	7.12678
								8.56017	1.45653	7.61732				7.08022	2.91306	3.92597				7.56017	3.64132	5.04329				7.08022	2.36958	5.23463				8.08022	2.45653	6.23463					3.12033	4.82611	6.61732				3.08022	4.02719	7.13582
								8.55576	1.45625	7.63188				7.07435	2.9125	3.94781				7.55576	3.64063	5.07969				7.07435	2.36875	5.26375				8.07435	2.45625	6.26375					3.11152	4.825	6.63188				3.07435	4.02656	7.14492
								8.55153	1.45598	7.64653				7.06871	2.91197	3.96979				7.55153	3.63996	5.11631				7.06871	2.36795	5.29305				8.06871	2.45598	6.29305					3.10306	4.82393	6.64653				3.06871	4.02596	7.15408
								8.54747	1.45573	7.66126				7.06329	2.91146	3.99189				7.54747	3.63932	5.15316				7.06329	2.36718	5.32252				8.06329	2.45573	6.32252					3.09494	4.82291	6.66126				3.06329	4.02539	7.16329
								8.54359	1.45548	7.67608				7.05811	2.91097	4.01412				7.54359	3.63871	5.19021				7.05811	2.36645	5.35217				8.05811	2.45548	6.35217					3.08717	4.82193	6.67608				3.05811	4.02484	7.17255
								8.53987	1.45525	7.69098				7.05316	2.9105	4.03647				7.53987	3.63812	5.22746				7.05316	2.36575	5.38197				8.05316	2.45525	6.38197					3.07975	4.821	6.69098				3.05316	4.02431	7.18186
								8.53634	1.45503	7.70596				7.04845	2.91005	4.05894				7.53634	3.63756	5.2649				7.04845	2.36508	5.41192				8.04845	2.45503	6.41192					3.07267	4.8201	6.70596				3.04845	4.02381	7.19122
								8.53298	1.45481	7.72101				7.04397	2.90963	4.08151				7.53298	3.63704	5.30252				7.04397	2.36444	5.44202				8.04397	2.45481	6.44202					3.06595	4.81926	6.72101				3.04397	4.02333	7.20063
								8.52979	1.45461	7.73613				7.03972	2.90923	4.10419				7.52979	3.63653	5.34032				7.03972	2.36384	5.47225				8.03972	2.45461	6.47225					3.05958	4.81845	6.73613				3.03972	4.02288	7.21008
								8.52679	1.45442	7.75131				7.03572	2.90885	4.12697				7.52679	3.63606	5.37828				7.03572	2.36327	5.50262				8.03572	2.45442	6.50262					3.05357	4.8177	6.75131				3.03572	4.02245	7.21957
								8.52396	1.45425	7.76655				7.03195	2.90849	4.14983				7.52396	3.63561	5.41639				7.03195	2.36274	5.53311				8.03195	2.45425	6.53311					3.04792	4.81698	6.76655				3.03195	4.02205	7.2291
								8.52131	1.45408	7.78186				7.02841	2.90816	4.17279				7.52131	3.6352	5.45464				7.02841	2.36224	5.56371				8.02841	2.45408	6.56371					3.04262	4.81632	6.78186				3.02841	4.02168	7.23866
								8.51884	1.45392	7.79721				7.02512	2.90785	4.19582				7.51884	3.63481	5.49303				7.02512	2.36177	5.59443				8.02512	2.45392	6.59443					3.03768	4.81569	6.79721				3.02512	4.02133	7.24826
								8.51655	1.45378	7.81262				7.02207	2.90756	4.21893				7.51655	3.63445	5.53155				7.02207	2.36134	5.62524				8.02207	2.45378	6.62524					3.03311	4.81512	6.81262				3.02207	4.021	7.25789
								8.51445	1.45365	7.82807				7.01926	2.90729	4.24211				7.51445	3.63412	5.57018				7.01926	2.36094	5.65614				8.01926	2.45365	6.65614					3.02889	4.81459	6.82807				3.01926	4.0207	7.26754
								8.51252	1.45353	7.84357				7.0167	2.90705	4.26535				7.51252	3.63381	5.60891				7.0167	2.36058	5.68713				8.0167	2.45353	6.68713					3.02504	4.8141	6.84357				3.0167	4.02043	7.27723
								8.51078	1.45342	7.8591				7.01437	2.90683	4.28865				7.51078	3.63354	5.64775				7.01437	2.36025	5.7182				8.01437	2.45342	6.7182					3.02156	4.81366	6.8591				3.01437	4.02018	7.28694
								8.50922	1.45332	7.87467				7.01229	2.90663	4.312				7.50922	3.63329	5.68667				7.01229	2.35995	5.74933				8.01229	2.45332	6.74933					3.01843	4.81327	6.87467				3.01229	4.01996	7.29667
								8.50784	1.45323	7.89027				7.01045	2.90646	4.3354				7.50784	3.63308	5.72566				7.01045	2.35969	5.78053				8.01045	2.45323	6.78053					3.01568	4.81292	6.89027				3.01045	4.01977	7.30642
								8.50664	1.45315	7.90589				7.00886	2.90631	4.35884				7.50664	3.63289	5.76473				7.00886	2.35946	5.81178				8.00886	2.45315	6.81178					3.01328	4.81262	6.90589				3.00886	4.0196	7.31618
								8.50563	1.45309	7.92154				7.00751	2.90618	4.38231				7.50563	3.63273	5.80385				7.00751	2.35927	5.84308				8.00751	2.45309	6.84308					3.01126	4.81236	6.92154				3.00751	4.01945	7.32596
								8.5048	1.45304	7.93721				7.0064	2.90608	4.40581				7.5048	3.6326	5.84302				7.0064	2.35912	5.87442				8.0064	2.45304	6.87442					3.0096	4.81215	6.93721				3.0064	4.01934	7.33576
								8.50416	1.453	7.95289				7.00554	2.906	4.42934				7.50416	3.6325	5.88223				7.00554	2.35899	5.90579				8.00554	2.453	6.90579					3.00831	4.81199	6.95289				3.00554	4.01925	7.34556
								8.5037	1.45297	7.96859				7.00493	2.90594	4.45288				7.5037	3.63242	5.92147				7.00493	2.35891	5.93718				8.00493	2.45297	6.93718					3.00739	4.81188	6.96859				3.00493	4.01918	7.35537
								8.50342	1.45295	7.98429				7.00456	2.9059	4.47644				7.50342	3.63238	5.96073				7.00456	2.35885	5.96859				8.00456	2.45295	6.96859					3.00684	4.81181	6.98429				3.00456	4.01914	7.36518
								8.50333	1.45295	8				7.00444	2.90589	4.5				7.50333	3.63236	6				7.00444	2.35884	6				8.00444	2.45295	7					3.00666	4.81178	7				3.00444	4.01913	7.375
								8.50342	1.45295	8.01571				7.00456	2.9059	4.52356				7.50342	3.63238	6.03927				7.00456	2.35885	6.03141				8.00456	2.45295	7.03141					3.00684	4.81181	7.01571				3.00456	4.01914	7.38482
								8.5037	1.45297	8.03141				7.00493	2.90594	4.54712				7.5037	3.63242	6.07853				7.00493	2.35891	6.06282				8.00493	2.45297	7.06282					3.00739	4.81188	7.03141				3.00493	4.01918	7.39463
								8.50416	1.453	8.04711				7.00554	2.906	4.57066				7.50416	3.6325	6.11777				7.00554	2.35899	6.09421				8.00554	2.453	7.09421					3.00831	4.81199	7.04711				3.00554	4.01925	7.40444
								8.5048	1.45304	8.06279				7.0064	2.90608	4.59419				7.5048	3.6326	6.15698				7.0064	2.35912	6.12558				8.0064	2.45304	7.12558					3.0096	4.81215	7.06279				3.0064	4.01934	7.41424
								8.50563	1.45309	8.07846				7.00751	2.90618	4.61769				7.50563	3.63273	6.19615				7.00751	2.35927	6.15692				8.00751	2.45309	7.15692					3.01126	4.81236	7.07846				3.00751	4.01945	7.42404
								8.50664	1.45315	8.09411				7.00886	2.90631	4.64116				7.50664	3.63289	6.23527				7.00886	2.35946	6.18822				8.00886	2.45315	7.18822					3.01328	4.81262	7.09411				3.00886	4.0196	7.43382
								8.50784	1.45323	8.10973				7.01045	2.90646	4.6646				7.50784	3.63308	6.27434				7.01045	2.35969	6.21947				8.01045	2.45323	7.21947					3.01568	4.81292	7.10973				3.01045	4.01977	7.44358
								8.50922	1.45332	8.12533				7.01229	2.90663	4.688				7.50922	3.63329	6.31333				7.01229	2.35995	6.25067				8.01229	2.45332	7.25067					3.01843	4.81327	7.12533				3.01229	4.01996	7.45333
								8.51078	1.45342	8.1409				7.01437	2.90683	4.71135				7.51078	3.63354	6.35225				7.01437	2.36025	6.2818				8.01437	2.45342	7.2818					3.02156	4.81366	7.1409				3.01437	4.02018	7.46306
								8.51252	1.45353	8.15643				7.0167	2.90705	4.73465				7.51252	3.63381	6.39109				7.0167	2.36058	6.31287				8.0167	2.45353	7.31287					3.02504	4.8141	7.15643				3.0167	4.02043	7.47277
								8.51445	1.45365	8.17193				7.01926	2.90729	4.75789				7.51445	3.63412	6.42982				7.01926	2.36094	6.34386				8.01926	2.45365	7.34386					3.02889	4.81459	7.17193				3.01926	4.0207	7.48246
								8.51655	1.45378	8.18738				7.02207	2.90756	4.78107				7.51655	3.63445	6.46845				7.02207	2.36134	6.37476				8.02207	2.45378	7.37476					3.03311	4.81512	7.18738				3.02207	4.021	7.49211
								8.51884	1.45392	8.20279				7.02512	2.90785	4.80418				7.51884	3.63481	6.50697				7.02512	2.36177	6.40557				8.02512	2.45392	7.40557					3.03768	4.81569	7.20279				3.02512	4.02133	7.50174
								8.52131	1.45408	8.21814				7.02841	2.90816	4.82721				7.52131	3.6352	6.54536				7.02841	2.36224	6.43629				8.02841	2.45408	7.43629					3.04262	4.81632	7.21814				3.02841	4.02168	7.51134
								8.52396	1.45425	8.23345				7.03195	2.90849	4.85017				7.52396	3.63561	6.58361				7.03195	2.36274	6.46689				8.03195	2.45425	7.46689					3.04792	4.81698	7.23345				3.03195	4.02205	7.5209
								8.52679	1.45442	8.24869				7.03572	2.90885	4.87303				7.52679	3.63606	6.62172				7.03572	2.36327	6.49738				8.03572	2.45442	7.49738					3.05357	4.8177	7.24869				3.03572	4.02245	7.53043
								8.52979	1.45461	8.26387				7.03972	2.90923	4.89581				7.52979	3.63653	6.65968				7.03972	2.36384	6.52775				8.03972	2.45461	7.52775					3.05958	4.81845	7.26387				3.03972	4.02288	7.53992
								8.53298	1.45481	8.27899				7.04397	2.90963	4.91849				7.53298	3.63704	6.69748				7.04397	2.36444	6.55798				8.04397	2.45481	7.55798					3.06595	4.81926	7.27899				3.04397	4.02333	7.54937
								8.53634	1.45503	8.29404				7.04845	2.91005	4.94106				7.53634	3.63756	6.7351				7.04845	2.36508	6.58808				8.04845	2.45503	7.58808					3.07267	4.8201	7.29404				3.04845	4.02381	7.55878
								8.53987	1.45525	8.30902				7.05316	2.9105	4.96353				7.53987	3.63812	6.77254				7.05316	2.36575	6.61803				8.05316	2.45525	7.61803					3.07975	4.821	7.30902				3.05316	4.02431	7.56814
								8.54359	1.45548	8.32392				7.05811	2.91097	4.98588				7.54359	3.63871	6.80979				7.05811	2.36645	6.64783				8.05811	2.45548	7.64783					3.08717	4.82193	7.32392				3.05811	4.02484	7.57745
								8.54747	1.45573	8.33874				7.06329	2.91146	5.00811				7.54747	3.63932	6.84684				7.06329	2.36718	6.67748				8.06329	2.45573	7.67748					3.09494	4.82291	7.33874				3.06329	4.02539	7.58671
								8.55153	1.45598	8.35347				7.06871	2.91197	5.03021				7.55153	3.63996	6.88369				7.06871	2.36795	6.70695				8.06871	2.45598	7.70695					3.10306	4.82393	7.35347				3.06871	4.02596	7.59592
								8.55576	1.45625	8.36812				7.07435	2.9125	5.05219				7.55576	3.64063	6.92031				7.07435	2.36875	6.73625				8.07435	2.45625	7.73625					3.11152	4.825	7.36812				3.07435	4.02656	7.60508
								8.56017	1.45653	8.38268				7.08022	2.91306	5.07403				7.56017	3.64132	6.95671				7.08022	2.36958	6.76537				8.08022	2.45653	7.76537					3.12033	4.82611	7.38268				3.08022	4.02719	7.61418
								8.56474	1.45682	8.39715				7.08632	2.91363	5.09572				7.56474	3.64204	6.99287				7.08632	2.37045	6.7943				8.08632	2.45682	7.7943					3.12948	4.82726	7.39715				3.08632	4.02784	7.62322
								8.56948	1.45711	8.41151				7.09264	2.91423	5.11727				7.56948	3.64279	7.02879				7.09264	2.37134	6.82303				8.09264	2.45711	7.82303					3.13896	4.82846	7.41151				3.09264	4.02851	7.6322
								8.57439	1.45742	8.42578				7.09919	2.91485	5.13867				7.57439	3.64356	7.06445				7.09919	2.37227	6.85156				8.09919	2.45742	7.85156					3.14878	4.8297	7.42578				3.09919	4.0292	7.64111
								8.57947	1.45774	8.43994				7.10596	2.91549	5.15991				7.57947	3.64436	7.09985				7.10596	2.37323	6.87988				8.10596	2.45774	7.87988					3.15894	4.83098	7.43994				3.10596	4.02992	7.64996
								8.58471	1.45807	8.45399				7.11295	2.91615	5.18099				7.58471	3.64519	7.13498				7.11295	2.37422	6.90798				8.11295	2.45807	7.90798					3.16942	4.8323	7.45399				3.11295	4.03067	7.65874
								8.59012	1.45842	8.46793				7.12016	2.91683	5.20189				7.59012	3.64604	7.16982				7.12016	2.37525	6.93586				8.12016	2.45842	7.93586					3.18023	4.83366	7.46793				3.12016	4.03143	7.66746
								8.59569	1.45877	8.48175				7.12758	2.91753	5.22263				7.59569	3.64692	7.20438				7.12758	2.3763	6.96351				8.12758	2.45877	7.96351					3.19137	4.83506	7.48175				3.12758	4.03222	7.6761
								8.60142	1.45913	8.49546				7.13522	2.91825	5.24319				7.60142	3.64782	7.23865				7.13522	2.37738	6.99092				8.13522	2.45913	7.99092					3.20284	4.83651	7.49546				3.13522	4.03304	7.68466
								8.60731	1.4595	8.50904				7.14308	2.919	5.26356				7.60731	3.64875	7.2726				7.14308	2.3785	7.01808				8.14308	2.4595	8.01808					3.21462	4.83799	7.50904				3.14308	4.03387	7.69315
								8.61336	1.45988	8.5225				7.15114	2.91976	5.28375				7.61336	3.6497	7.30625				7.15114	2.37964	7.045				8.15114	2.45988	8.045					3.22672	4.83952	7.5225				3.15114	4.03473	7.70156
								8.61956	1.46027	8.53583				7.15942	2.92054	5.30374				7.61956	3.65068	7.33957				7.15942	2.38081	7.07165				8.15942	2.46027	8.07165					3.23913	4.84108	7.53583				3.15942	4.03561	7.70989
								8.62593	1.46067	8.54902				7.1679	2.92134	5.32353				7.62593	3.65168	7.37256				7.1679	2.38202	7.09805				8.1679	2.46067	8.09805					3.25185	4.84269	7.54902				3.1679	4.03651	7.71814
								8.63244	1.46108	8.56208				7.17659	2.92216	5.34313				7.63244	3.65271	7.40521				7.17659	2.38325	7.12417				8.17659	2.46108	8.12417					3.26489	4.84433	7.56208				3.17659	4.03744	7.7263
								8.63911	1.4615	8.57501				7.18548	2.92301	5.36251				7.63911	3.65376	7.43751				7.18548	2.38451	7.15001				8.18548	2.4615	8.15001					3.27822	4.84601	7.57501				3.18548	4.03838	7.73438
								8.64593	1.46193	8.58779				7.19457	2.92386	5.38168				7.64593	3.65483	7.46946				7.19457	2.3858	7.17557				8.19457	2.46193	8.17557					3.29186	4.84773	7.58779				3.19457	4.03935	7.74237
								8.6529	1.46237	8.60042				7.20386	2.92474	5.40063				7.6529	3.65593	7.50105				7.20386	2.38711	7.20084				8.20386	2.46237	8.20084					3.3058	4.84949	7.60042				3.20386	4.04034	7.75026
								8.66001	1.46282	8.61291				7.21335	2.92564	5.41936				7.66001	3.65705	7.53227				7.21335	2.38846	7.22581				8.21335	2.46282	8.22581					3.32003	4.85128	7.61291				3.21335	4.04134	7.75807
								8.66727	1.46328	8.62524				7.22303	2.92656	5.43786				7.66727	3.65819	7.56311				7.22303	2.38983	7.25049				8.22303	2.46328	8.25049					3.33455	4.85311	7.62524				3.22303	4.04237	7.76578
								8.67468	1.46374	8.63742				7.23291	2.92749	5.45614				7.67468	3.65936	7.59356				7.23291	2.39123	7.27485				8.23291	2.46374	8.27485					3.34936	4.85498	7.63742				3.23291	4.04342	7.77339
								8.68223	1.46422	8.64945				7.24297	2.92844	5.47417				7.68223	3.66055	7.62362				7.24297	2.39266	7.2989				8.24297	2.46422	8.2989					3.36445	4.85688	7.64945				3.24297	4.04449	7.78091
								8.68991	1.4647	8.66131				7.25322	2.92941	5.49197				7.68991	3.66176	7.65328				7.25322	2.39411	7.32262				8.25322	2.4647	8.32262					3.37983	4.85882	7.66131				3.25322	4.04558	7.78832
								8.69774	1.4652	8.67301				7.26365	2.93039	5.50952				7.69774	3.66299	7.68253				7.26365	2.39559	7.34603				8.26365	2.4652	8.34603					3.39548	4.86079	7.67301				3.26365	4.04669	7.79563
								8.7057	1.4657	8.68455				7.27427	2.9314	5.52682				7.7057	3.66425	7.71137				7.27427	2.3971	7.36909				8.27427	2.4657	8.36909					3.4114	4.8628	7.68455				3.27427	4.04782	7.80284
								8.7138	1.46621	8.69591				7.28506	2.93242	5.54387				7.7138	3.66552	7.73978				7.28506	2.39863	7.39183				8.28506	2.46621	8.39183					3.42759	4.86484	7.69591				3.28506	4.04897	7.80995
								8.72202	1.46673	8.70711				7.29603	2.93346	5.56066				7.72202	3.66682	7.76777				7.29603	2.40018	7.41421				8.29603	2.46673	8.41421					3.44405	4.86691	7.70711				3.29603	4.05014	7.81694
								8.73038	1.46725	8.71813				7.30718	2.93451	5.57719				7.73038	3.66814	7.79532				7.30718	2.40176	7.43625				8.30718	2.46725	8.43625					3.46076	4.86902	7.71813				3.30718	4.05132	7.82383
								8.73887	1.46779	8.72897				7.31849	2.93558	5.59345				7.73887	3.66947	7.82242				7.31849	2.40337	7.45794				8.31849	2.46779	8.45794					3.47774	4.87116	7.72897				3.31849	4.05253	7.83061
								8.74748	1.46833	8.73963				7.32997	2.93666	5.60945				7.74748	3.67083	7.84908				7.32997	2.405	7.47926				8.32997	2.46833	8.47926					3.49496	4.87333	7.73963				3.32997	4.05375	7.83727
								8.75622	1.46888	8.75011				7.34162	2.93777	5.62517				7.75622	3.67221	7.87528				7.34162	2.40665	7.50022				8.34162	2.46888	8.50022					3.51243	4.87553	7.75011				3.34162	4.05499	7.84382
								8.76508	1.46944	8.76041				7.35343	2.93888	5.64061				7.76508	3.6736	7.90101				7.35343	2.40832	7.52081				8.35343	2.46944	8.52081					3.53015	4.87776	7.76041				3.35343	4.05624	7.85025
								8.77405	1.47001	8.77051				7.3654	2.94001	5.65577				7.77405	3.67502	7.92628				7.3654	2.41002	7.54103				8.3654	2.47001	8.54103					3.54811	4.88003	7.77051				3.3654	4.05751	7.85657
								8.78315	1.47058	8.78043				7.37753	2.94116	5.67065				7.78315	3.67645	7.95108				7.37753	2.41174	7.56086				8.37753	2.47058	8.56086					3.5663	4.88232	7.78043				3.37753	4.0588	7.86277
								8.79236	1.47116	8.79016				7.38981	2.94232	5.68523				7.79236	3.6779	7.97539				7.38981	2.41348	7.58031				8.38981	2.47116	8.58031					3.58472	4.88464	7.79016				3.38981	4.06011	7.86885
								8.80168	1.47175	8.79968				7.40224	2.9435	5.69953				7.80168	3.67937	7.99921				7.40224	2.41524	7.59937				8.40224	2.47175	8.59937					3.60337	4.88699	7.79968				3.40224	4.06143	7.8748
								8.81112	1.47234	8.80902				7.41482	2.94468	5.71353				7.81112	3.68086	8.02254				7.41482	2.41703	7.61803				8.41482	2.47234	8.61803					3.62224	4.88937	7.80902				3.41482	4.06277	7.88064
								8.82066	1.47294	8.81815				7.42755	2.94589	5.72722				7.82066	3.68236	8.04537				7.42755	2.41883	7.6363				8.42755	2.47294	8.6363					3.64132	4.89177	7.81815				3.42755	4.06412	7.88634
								8.83031	1.47355	8.82708				7.44041	2.9471	5.74062				7.83031	3.68388	8.0677				7.44041	2.42065	7.65416				8.44041	2.47355	8.65416					3.66062	4.89421	7.82708				3.44041	4.06549	7.89193
								8.84006	1.47417	8.83581				7.45341	2.94833	5.75371				7.84006	3.68542	8.08952				7.45341	2.4225	7.67161				8.45341	2.47417	8.67161					3.68012	4.89666	7.83581				3.45341	4.06687	7.89738
								8.84991	1.47479	8.84433				7.46655	2.94957	5.76649				7.84991	3.68697	8.11082				7.46655	2.42436	7.68866				8.46655	2.47479	8.68866					3.69983	4.89915	7.84433				3.46655	4.06827	7.9027
								8.85987	1.47541	8.85264				7.47982	2.95083	5.77896				7.85987	3.68854	8.1316				7.47982	2.42624	7.70528				8.47982	2.47541	8.70528					3.71973	4.90166	7.85264				3.47982	4.06968	7.9079
								8.86991	1.47605	8.86074				7.49322	2.95209	5.79111				7.86991	3.69012	8.15186				7.49322	2.42814	7.72148				8.49322	2.47605	8.72148					3.73983	4.90419	7.86074				3.49322	4.07111	7.91296
								8.88006	1.47669	8.86863				7.50674	2.95337	5.80295				7.88006	3.69172	8.17158				7.50674	2.43006	7.73726				8.50674	2.47669	8.73726					3.76011	4.90675	7.86863				3.50674	4.07254	7.91789
								8.89029	1.47733	8.87631				7.52038	2.95466	5.81446				7.89029	3.69333	8.19077				7.52038	2.43199	7.75261				8.52038	2.47733	8.75261					3.78058	4.90933	7.87631				3.52038	4.074	7.92269
								8.90061	1.47798	8.88377				7.53415	2.95596	5.82565				7.90061	3.69495	8.20941				7.53415	2.43395	7.76753				8.53415	2.47798	8.76753					3.80122	4.91193	7.88377				3.53415	4.07546	7.92735
								8.91102	1.47864	8.89101				7.54802	2.95728	5.83651				7.91102	3.69659	8.22752				7.54802	2.43591	7.78201				8.54802	2.47864	8.78201					3.82204	4.91455	7.89101				3.54802	4.07694	7.93188
								8.92151	1.4793	8.89803				7.56201	2.9586	5.84704				7.92151	3.69825	8.24507				7.56201	2.4379	7.79606				8.56201	2.4793	8.79606					3.84302	4.9172	7.89803				3.56201	4.07842	7.93627
								8.93208	1.47997	8.90483				7.57611	2.95993	5.85724				7.93208	3.69991	8.26207				7.57611	2.4399	7.80965				8.57611	2.47997	8.80965					3.86417	4.91986	7.90483				3.57611	4.07992	7.94052
								8.94273	1.48064	8.9114				7.59031	2.96127	5.8671				7.94273	3.70159	8.27851				7.59031	2.44191	7.82281				8.59031	2.48064	8.82281					3.88547	4.92255	7.9114				3.59031	4.08143	7.94463
								8.95346	1.48131	8.91775				7.60461	2.96263	5.87663				7.95346	3.70328	8.29439				7.60461	2.44394	7.83551				8.60461	2.48131	8.83551					3.90692	4.92525	7.91775				3.60461	4.08295	7.9486
								8.96426	1.48199	8.92388				7.61901	2.96399	5.88582				7.96426	3.70498	8.3097				7.61901	2.44598	7.84776				8.61901	2.48199	8.84776					3.92852	4.92797	7.92388				3.61901	4.08448	7.95242
								8.97513	1.48268	8.92978				7.63351	2.96536	5.89466				7.97513	3.7067	8.32444				7.63351	2.44803	7.85955				8.63351	2.48268	8.85955					3.95026	4.93071	7.92978				3.63351	4.08603	7.95611
								8.98607	1.48337	8.93544				7.64809	2.96674	5.90317				7.98607	3.70842	8.33861				7.64809	2.4501	7.87089				8.64809	2.48337	8.87089					3.97214	4.93347	7.93544				3.64809	4.08758	7.95965
								8.99707	1.48406	8.94088				7.66277	2.96812	5.91132				7.99707	3.71015	8.3522				7.66277	2.45218	7.88176				8.66277	2.48406	8.88176					3.99415	4.93624	7.94088				3.66277	4.08914	7.96305
								9.00814	1.48476	8.94609				7.67752	2.96952	5.91913				8.00814	3.7119	8.36521				7.67752	2.45428	7.89217				8.67752	2.48476	8.89217					4.01628	4.93903	7.94609				3.67752	4.09071	7.9663
								9.01927	1.48546	8.95106				7.69235	2.97092	5.92658				8.01927	3.71365	8.37764				7.69235	2.45638	7.90211				8.69235	2.48546	8.90211					4.03853	4.94184	7.95106				3.69235	4.09228	7.96941
								9.03045	1.48616	8.95579				7.70726	2.97233	5.93369				8.03045	3.71541	8.38948				7.70726	2.45849	7.91159				8.70726	2.48616	8.91159					4.0609	4.94466	7.95579				3.70726	4.09387	7.97237
								9.04169	1.48687	8.96029				7.72225	2.97374	5.94044				8.04169	3.71718	8.40073				7.72225	2.46062	7.92059				8.72225	2.48687	8.92059					4.08337	4.94749	7.96029				3.72225	4.09546	7.97518
								9.05297	1.48758	8.96456				7.7373	2.97517	5.94684				8.05297	3.71896	8.41139				7.7373	2.46275	7.92911				8.7373	2.48758	8.92911					4.10595	4.95033	7.96456				3.7373	4.09706	7.97785
								9.06431	1.4883	8.96858				7.75241	2.9766	5.95287				8.06431	3.72075	8.42146				7.75241	2.46489	7.93717				8.75241	2.4883	8.93717					4.12862	4.95319	7.96858				3.75241	4.09867	7.98036
								9.07569	1.48902	8.97237				7.76759	2.97803	5.95855				8.07569	3.72254	8.43092				7.76759	2.46705	7.94474				8.76759	2.48902	8.94474					4.15139	4.95606	7.97237				3.76759	4.10028	7.98273
								9.08712	1.48974	8.97592				7.78282	2.97947	5.96388				8.08712	3.72434	8.43979				7.78282	2.46921	7.95183				8.78282	2.48974	8.95183					4.17424	4.95894	7.97592				3.78282	4.1019	7.98495
								9.09858	1.49046	8.97922				7.79811	2.98092	5.96883				8.09858	3.72615	8.44806				7.79811	2.47137	7.95845				8.79811	2.49046	8.95845					4.19717	4.96183	7.97922				3.79811	4.10353	7.98701
								9.11009	1.49118	8.98229				7.81345	2.98237	5.97343				8.11009	3.72796	8.45572				7.81345	2.47355	7.96457				8.81345	2.49118	8.96457					4.22018	4.96473	7.98229				3.81345	4.10516	7.98893
								9.12163	1.49191	8.98511				7.82883	2.98382	5.97766				8.12163	3.72978	8.46277				7.82883	2.47573	7.97022				8.82883	2.49191	8.97022					4.24325	4.96764	7.98511				3.82883	4.1068	7.99069
								9.13319	1.49264	8.98769				7.84426	2.98528	5.98153				8.13319	3.7316	8.46922				7.84426	2.47792	7.97538				8.84426	2.49264	8.97538					4.26639	4.97056	7.98769				3.84426	4.10844	7.99231
								9.14479	1.49337	8.99002				7.85972	2.98674	5.98504				8.14479	3.73343	8.47506				7.85972	2.48011	7.98005				8.85972	2.49337	8.98005					4.28959	4.97348	7.99002				3.85972	4.11008	7.99376
								9.15642	1.4941	8.99211				7.87522	2.98821	5.98817				8.15642	3.73526	8.48029				7.87522	2.48231	7.98423				8.87522	2.4941	8.98423					4.31283	4.97641	7.99211				3.87522	4.11173	7.99507
								9.16806	1.49484	8.99396				7.89075	2.98967	5.99094				8.16806	3.73709	8.4849				7.89075	2.48451	7.98792				8.89075	2.49484	8.98792					4.33613	4.97935	7.99396				3.89075	4.11338	7.99623
								9.17973	1.49557	8.99556				7.90631	2.99114	5.99334				8.17973	3.73893	8.4889				7.90631	2.48672	7.99112				8.90631	2.49557	8.99112					4.35946	4.98229	7.99556				3.90631	4.11504	7.99723
								9.19142	1.49631	8.99692				7.92189	2.99262	5.99538				8.19142	3.74077	8.49229				7.92189	2.48892	7.99383				8.92189	2.49631	8.99383					4.38283	4.98523	7.99692				3.92189	4.11669	7.99807
								9.20312	1.49705	8.99803				7.93749	2.99409	5.99704				8.20312	3.74261	8.49507				7.93749	2.49114	7.99605				8.93749	2.49705	8.99605					4.40623	4.98818	7.99803				3.93749	4.11835	7.99877
								9.21483	1.49778	8.99889				7.9531	2.99557	5.99833				8.21483	3.74446	8.49722				7.9531	2.49335	7.99778				8.9531	2.49778	8.99778					4.42965	4.99113	7.99889				3.9531	4.12001	7.99931
								9.22655	1.49852	8.99951				7.96873	2.99704	5.99926				8.22655	3.7463	8.49877				7.96873	2.49557	7.99901				8.96873	2.49852	8.99901					4.45309	4.99409	7.99951				3.96873	4.12167	7.99969
								9.23827	1.49926	8.99988				7.98436	2.99852	5.99981				8.23827	3.74815	8.49969				7.98436	2.49778	7.99975				8.98436	2.49926	8.99975					4.47654	4.99704	7.99988				3.98436	4.12334	7.99992
								9.25	1.5	9				8	3	6				8.25	3.75	8.5				8	2.5	8				9	2.5	9					4.5	5	8				4	4.125	8
								9.25	1.5	7				8	3	3				8.25	3.75	3.5				8	2.5	4				9	2.5	5					4.5	5	6				4	4.125	6.75
								9.23831	1.49902	7.00012				7.98442	2.99803	3.00019				8.23831	3.74754	3.50031				7.98442	2.49705	4.00025				8.98442	2.49902	5.00025					4.47662	4.99606	6.00012				3.98442	4.12279	6.75008
								9.22663	1.49803	7.00049				7.96884	2.99606	3.00074				8.22663	3.74508	3.50123				7.96884	2.49409	4.00099				8.96884	2.49803	5.00099					4.45326	4.99213	6.00049				3.96884	4.12057	6.75031
								9.21495	1.49705	7.00111				7.95326	2.9941	3.00167				8.21495	3.74262	3.50278				7.95326	2.49114	4.00222				8.95326	2.49705	5.00222					4.4299	4.98819	6.00111				3.95326	4.11836	6.75069
								9.20328	1.49607	7.00197				7.9377	2.99213	3.00296				8.20328	3.74016	3.50493				7.9377	2.4882	4.00395				8.9377	2.49607	5.00395					4.40656	4.98426	6.00197				3.9377	4.11615	6.75123
								9.19162	1.49508	7.00308				7.92216	2.99017	3.00462				8.19162	3.73771	3.50771				7.92216	2.48525	4.00617				8.92216	2.49508	5.00617					4.38324	4.98033	6.00308				3.92216	4.11394	6.75193
								9.17998	1.4941	7.00444				7.90663	2.98821	3.00666				8.17998	3.73526	3.5111				7.90663	2.48231	4.00888				8.90663	2.4941	5.00888					4.35995	4.97641	6.00444				3.90663	4.11173	6.75277
								9.16835	1.49312	7.00604				7.89113	2.98625	3.00906				8.16835	3.73281	3.5151				7.89113	2.47937	4.01208				8.89113	2.49312	5.01208					4.3367	4.97249	6.00604				3.89113	4.10953	6.75377
								9.15674	1.49215	7.00789				7.87566	2.98429	3.01183				8.15674	3.73036	3.51971				7.87566	2.47644	4.01577				8.87566	2.49215	5.01577					4.31348	4.96858	6.00789				3.87566	4.10733	6.75493
								9.14516	1.49117	7.00998				7.86021	2.98234	3.01496				8.14516	3.72793	3.52494				7.86021	2.47351	4.01995				8.86021	2.49117	5.01995					4.29031	4.96468	6.00998				3.86021	4.10513	6.75624
								9.1336	1.4902	7.01231				7.8448	2.98039	3.01847				8.1336	3.72549	3.53078				7.8448	2.47059	4.02462				8.8448	2.4902	5.02462					4.2672	4.96079	6.01231				3.8448	4.10294	6.75769
								9.12207	1.48923	7.01489				7.82943	2.97845	3.02234				8.12207	3.72306	3.53723				7.82943	2.46768	4.02978				8.82943	2.48923	5.02978					4.24414	4.9569	6.01489				3.82943	4.10076	6.75931
								9.11057	1.48826	7.01771				7.8141	2.97651	3.02657				8.11057	3.72064	3.54428				7.8141	2.46477	4.03543				8.8141	2.48826	5.03543					4.22114	4.95303	6.01771				3.8141	4.09858	6.76107
								9.09911	1.48729	7.02078				7.79881	2.97458	3.03117				8.09911	3.71823	3.55194				7.79881	2.46188	4.04155				8.79881	2.48729	5.04155					4.19822	4.94917	6.02078				3.79881	4.09641	6.76299
								9.08768	1.48633	7.02408				7.78358	2.97266	3.03612				8.08768	3.71582	3.56021				7.78358	2.45899	4.04817				8.78358	2.48633	5.04817					4.17537	4.94532	6.02408				3.78358	4.09424	6.76505
								9.0763	1.48537	7.02763				7.7684	2.97074	3.04145				8.0763	3.71343	3.56908				7.7684	2.45611	4.05526				8.7684	2.48537	5.05526					4.15259	4.94148	6.02763				3.7684	4.09208	6.76727
								9.06495	1.48442	7.03142				7.75327	2.96883	3.04713				8.06495	3.71104	3.57854				7.75327	2.45325	4.06283				8.75327	2.48442	5.06283					4.12991	4.93766	6.03142				3.75327	4.08993	6.76964
								9.05366	1.48346	7.03544				7.73821	2.96693	3.05316				8.05366	3.70866	3.58861				7.73821	2.45039	4.07089				8.73821	2.48346	5.07089					4.10731	4.93386	6.03544				3.73821	4.08779	6.77215
								9.04241	1.48252	7.03971				7.72321	2.96503	3.05956				8.04241	3.70629	3.59927				7.72321	2.44755	4.07941				8.72321	2.48252	5.07941					4.08481	4.93007	6.03971				3.72321	4.08566	6.77482
								9.03121	1.48157	7.04421				7.70828	2.96315	3.06631				8.03121	3.70393	3.61052				7.70828	2.44472	4.08841				8.70828	2.48157	5.08841					4.06242	4.92629	6.04421				3.70828	4.08354	6.77763
								9.02006	1.48063	7.04894				7.69342	2.96127	3.07342				8.02006	3.70159	3.62236				7.69342	2.4419	4.09789				8.69342	2.48063	5.09789					4.04013	4.92254	6.04894				3.69342	4.08143	6.78059
								9.00898	1.4797	7.05391				7.67864	2.9594	3.08087				8.00898	3.69925	3.63479				7.67864	2.4391	4.10783				8.67864	2.4797	5.10783					4.01796	4.9188	6.05391				3.67864	4.07933	6.7837
								8.99795	1.47877	7.05912				7.66393	2.95754	3.08868				7.99795	3.69693	3.6478				7.66393	2.43632	4.11824				8.66393	2.47877	5.11824					3.9959	4.91509	6.05912				3.66393	4.07724	6.78695
								8.98698	1.47785	7.06456				7.64931	2.9557	3.09683				7.98698	3.69462	3.66139				7.64931	2.43355	4.12911				8.64931	2.47785	5.12911					3.97397	4.9114	6.06456				3.64931	4.07516	6.79035
								8.97608	1.47693	7.07022				7.63478	2.95386	3.10534				7.97608	3.69233	3.67556				7.63478	2.43079	4.14045				8.63478	2.47693	5.14045					3.95217	4.90772	6.07022				3.63478	4.07309	6.79389
								8.96525	1.47602	7.07612				7.62033	2.95204	3.11418				7.96525	3.69005	3.6903				7.62033	2.42806	4.15224				8.62033	2.47602	5.15224					3.9305	4.90407	6.07612				3.62033	4.07104	6.79758
								8.95449	1.47511	7.08225				7.60598	2.95022	3.12337				7.95449	3.68778	3.70561				7.60598	2.42534	4.16449				8.60598	2.47511	5.16449					3.90898	4.90045	6.08225				3.60598	4.069	6.8014
								8.9438	1.47421	7.0886				7.59173	2.94842	3.1329				7.9438	3.68553	3.72149				7.59173	2.42264	4.17719				8.59173	2.47421	5.17719					3.8876	4.89685	6.0886				3.59173	4.06698	6.80537
								8.93318	1.47332	7.09517				7.57758	2.94664	3.14276				7.93318	3.68329	3.73793				7.57758	2.41995	4.19035				8.57758	2.47332	5.19035					3.86637	4.89327	6.09517				3.57758	4.06497	6.80948
								8.92265	1.47243	7.10197				7.56353	2.94486	3.15296				7.92265	3.68108	3.75493				7.56353	2.41729	4.20394				8.56353	2.47243	5.20394					3.84529	4.88972	6.10197				3.56353	4.06297	6.81373
								8.91219	1.47155	7.10899				7.54959	2.9431	3.16349				7.91219	3.67887	3.77248				7.54959	2.41465	4.21799				8.54959	2.47155	5.21799					3.82438	4.8862	6.10899				3.54959	4.06099	6.81812
								8.90182	1.47068	7.11623				7.53576	2.94135	3.17435				7.90182	3.67669	3.79059				7.53576	2.41203	4.23247				8.53576	2.47068	5.23247					3.80364	4.88271	6.11623				3.53576	4.05902	6.82265
								8.89153	1.46981	7.12369				7.52205	2.93962	3.18554				7.89153	3.67453	3.80923				7.52205	2.40943	4.24739				8.52205	2.46981	5.24739					3.78307	4.87924	6.12369				3.52205	4.05707	6.82731
								8.88134	1.46895	7.13137				7.50845	2.9379	3.19705				7.88134	3.67238	3.82842				7.50845	2.40685	4.26274				8.50845	2.46895	5.26274					3.76267	4.87581	6.13137				3.50845	4.05514	6.83211
								8.87123	1.4681	7.13926				7.49497	2.9362	3.20889				7.87123	3.67025	3.84814				7.49497	2.4043	4.27852				8.49497	2.4681	5.27852					3.74246	4.8724	6.13926				3.49497	4.05323	6.83704
								8.86122	1.46726	7.14736				7.48162	2.93451	3.22104				7.86122	3.66814	3.8684				7.48162	2.40177	4.29472				8.48162	2.46726	5.29472					3.72243	4.86903	6.14736				3.48162	4.05133	6.8421
								8.8513	1.46642	7.15567				7.4684	2.93284	3.23351				7.8513	3.66605	3.88918				7.4684	2.39926	4.31134				8.4684	2.46642	5.31134					3.7026	4.86569	6.15567				3.4684	4.04945	6.8473
								8.84148	1.46559	7.16419				7.45531	2.93119	3.24629				7.84148	3.66399	3.91048				7.45531	2.39678	4.32839				8.45531	2.46559	5.32839					3.68296	4.86238	6.16419				3.45531	4.04759	6.85262
								8.83176	1.46478	7.17292				7.44235	2.92955	3.25938				7.83176	3.66194	3.9323				7.44235	2.39433	4.34584				8.44235	2.46478	5.34584					3.66352	4.8591	6.17292				3.44235	4.04575	6.85807
								8.82215	1.46397	7.18185				7.42953	2.92793	3.27278				7.82215	3.65992	3.95463				7.42953	2.3919	4.3637				8.42953	2.46397	5.3637					3.64429	4.85587	6.18185				3.42953	4.04392	6.86366
								8.81264	1.46317	7.19098				7.41685	2.92633	3.28647				7.81264	3.65791	3.97746				7.41685	2.3895	4.38197				8.41685	2.46317	5.38197					3.62527	4.85266	6.19098				3.41685	4.04212	6.86936
								8.80324	1.46237	7.20032				7.40431	2.92475	3.30047				7.80324	3.65593	4.00079				7.40431	2.38712	4.40063				8.40431	2.46237	5.40063					3.60647	4.84949	6.20032				3.40431	4.04034	6.8752
								8.79394	1.46159	7.20984				7.39193	2.92318	3.31477				7.79394	3.65398	4.02461				7.39193	2.38477	4.41969				8.39193	2.46159	5.41969					3.58789	4.84636	6.20984				3.39193	4.03858	6.88115
								8.78477	1.46082	7.21957				7.37969	2.92164	3.32935				7.78477	3.65205	4.04892				7.37969	2.38245	4.43914				8.37969	2.46082	5.43914					3.56953	4.84327	6.21957				3.37969	4.03684	6.88723
								8.7757	1.46005	7.22949				7.3676	2.92011	3.34423				7.7757	3.65014	4.07372				7.3676	2.38016	4.45897				8.3676	2.46005	5.45897					3.5514	4.84022	6.22949				3.3676	4.03512	6.89343
								8.76675	1.4593	7.23959				7.35567	2.9186	3.35939				7.76675	3.64825	4.09899				7.35567	2.3779	4.47919				8.35567	2.4593	5.47919					3.53351	4.83721	6.23959				3.35567	4.03343	6.89975
								8.75793	1.45856	7.24989				7.3439	2.91712	3.37483				7.75793	3.64639	4.12472				7.3439	2.37567	4.49978				8.3439	2.45856	5.49978					3.51585	4.83423	6.24989				3.3439	4.03176	6.90618
								8.74922	1.45782	7.26037				7.33229	2.91565	3.39055				7.74922	3.64456	4.15092				7.33229	2.37347	4.52074				8.33229	2.45782	5.52074					3.49844	4.8313	6.26037				3.33229	4.03011	6.91273
								8.74064	1.4571	7.27103				7.32085	2.9142	3.40655				7.74064	3.64275	4.17758				7.32085	2.37131	4.54206				8.32085	2.4571	5.54206					3.48128	4.82841	6.27103				3.32085	4.02848	6.91939
								8.73218	1.45639	7.28187				7.30957	2.91278	3.42281				7.73218	3.64097	4.20468				7.30957	2.36917	4.56375				8.30957	2.45639	5.56375					3.46436	4.82556	6.28187				3.30957	4.02688	6.92617
								8.72385	1.45569	7.29289				7.29847	2.91138	3.43934				7.72385	3.63922	4.23223				7.29847	2.36706	4.58579				8.29847	2.45569	5.58579					3.4477	4.82275	6.29289				3.29847	4.0253	6.93306
								8.71565	1.455	7.30409				7.28754	2.90999	3.45613				7.71565	3.63749	4.26022				7.28754	2.36499	4.60817				8.28754	2.455	5.60817					3.4313	4.81999	6.30409				3.28754	4.02374	6.94005
								8.70758	1.45432	7.31545				7.27678	2.90864	3.47318				7.70758	3.6358	4.28863				7.27678	2.36295	4.63091				8.27678	2.45432	5.63091					3.41517	4.81727	6.31545				3.27678	4.02222	6.94716
								8.69965	1.45365	7.32699				7.2662	2.9073	3.49048				7.69965	3.63412	4.31747				7.2662	2.36095	4.65397				8.2662	2.45365	5.65397					3.3993	4.8146	6.32699				3.2662	4.02071	6.95437
								8.69185	1.45299	7.33869				7.2558	2.90599	3.50803				7.69185	3.63248	4.34672				7.2558	2.35898	4.67738				8.2558	2.45299	5.67738					3.38371	4.81197	6.33869				3.2558	4.01923	6.96168
								8.68419	1.45235	7.35055				7.24559	2.9047	3.52583				7.68419	3.63087	4.37638				7.24559	2.35704	4.7011				8.24559	2.45235	5.7011					3.36839	4.80939	6.35055				3.24559	4.01778	6.96909
								8.67667	1.45171	7.36258				7.23556	2.90343	3.54386				7.67667	3.62929	4.40644				7.23556	2.35514	4.72515				8.23556	2.45171	5.72515					3.35334	4.80686	6.36258				3.23556	4.01636	6.97661
								8.66929	1.45109	7.37476				7.22572	2.90219	3.56214				7.66929	3.62773	4.43689				7.22572	2.35328	4.74951				8.22572	2.45109	5.74951					3.33859	4.80437	6.37476				3.22572	4.01496	6.98422
								8.66206	1.45048	7.38709				7.21608	2.90097	3.58064				7.66206	3.62621	4.46773				7.21608	2.35145	4.77419				8.21608	2.45048	5.77419					3.32411	4.80193	6.38709				3.21608	4.01359	6.99193
								8.65497	1.44989	7.39958				7.20662	2.89977	3.59937				7.65497	3.62472	4.49895				7.20662	2.34966	4.79916				8.20662	2.44989	5.79916					3.30993	4.79955	6.39958				3.20662	4.01224	6.99974
								8.64802	1.4493	7.41221				7.19736	2.8986	3.61832				7.64802	3.62325	4.53054				7.19736	2.3479	4.82443				8.19736	2.4493	5.82443					3.29604	4.79721	6.41221				3.19736	4.01093	7.00763
								8.64123	1.44873	7.42499				7.1883	2.89746	3.63749				7.64123	3.62182	4.56249				7.1883	2.34619	4.84999				8.1883	2.44873	5.84999					3.28245	4.79492	6.42499				3.1883	4.00964	7.01562
								8.63458	1.44817	7.43792				7.17944	2.89634	3.65687				7.63458	3.62042	4.59479				7.17944	2.34451	4.87583				8.17944	2.44817	5.87583					3.26916	4.79268	6.43792				3.17944	4.00838	7.0237
								8.62809	1.44762	7.45098				7.17078	2.89525	3.67647				7.62809	3.61906	4.62744				7.17078	2.34287	4.90195				8.17078	2.44762	5.90195					3.25617	4.79049	6.45098				3.17078	4.00715	7.03186
								8.62175	1.44709	7.46417				7.16233	2.89418	3.69626				7.62175	3.61772	4.66043				7.16233	2.34127	4.92835				8.16233	2.44709	5.92835					3.24349	4.78836	6.46417				3.16233	4.00595	7.04011
								8.61556	1.44657	7.4775				7.15408	2.89314	3.71625				7.61556	3.61642	4.69375				7.15408	2.3397	4.955				8.15408	2.44657	5.955					3.23112	4.78627	6.4775				3.15408	4.00478	7.04844
								8.60953	1.44606	7.49096				7.14605	2.89212	3.73644				7.60953	3.61515	4.7274				7.14605	2.33818	4.98192				8.14605	2.44606	5.98192					3.21907	4.78424	6.49096				3.14605	4.00364	7.05685
								8.60366	1.44557	7.50454				7.13822	2.89113	3.75681				7.60366	3.61391	4.76135				7.13822	2.3367	5.00908				8.13822	2.44557	6.00908					3.20733	4.78226	6.50454				3.13822	4.00252	7.06534
								8.59795	1.44508	7.51825				7.1306	2.89017	3.77737				7.59795	3.61271	4.79562				7.1306	2.33525	5.03649				8.1306	2.44508	6.03649					3.1959	4.78034	6.51825				3.1306	4.00144	7.0739
								8.5924	1.44462	7.53207				7.1232	2.88923	3.79811				7.5924	3.61154	4.83018				7.1232	2.33385	5.06414				8.1232	2.44462	6.06414					3.1848	4.77847	6.53207				3.1232	4.00039	7.08254
								8.58701	1.44416	7.54601				7.11602	2.88833	3.81901				7.58701	3.61041	4.86502				7.11602	2.33249	5.09202				8.11602	2.44416	6.09202					3.17403	4.77665	6.54601				3.11602	3.99937	7.09126
								8.58179	1.44372	7.56006				7.10905	2.88745	3.84009				7.58179	3.60931	4.90015				7.10905	2.33117	5.12012				8.10905	2.44372	6.12012					3.16358	4.77489	6.56006				3.10905	3.99838	7.10004
								8.57673	1.4433	7.57422				7.10231	2.8866	3.86133				7.57673	3.60824	4.93555				7.10231	2.32989	5.14844				8.10231	2.4433	6.14844					3.15346	4.77319	6.57422				3.10231	3.99742	7.10889
								8.57184	1.44289	7.58849				7.09578	2.88577	3.88273				7.57184	3.60721	4.97121				7.09578	2.32866	5.17697				8.09578	2.44289	6.17697					3.14368	4.77154	6.58849				3.09578	3.99649	7.1178
								8.56711	1.44249	7.60285				7.08948	2.88497	3.90428				7.56711	3.60622	5.00713				7.08948	2.32746	5.2057				8.08948	2.44249	6.2057					3.13422	4.76995	6.60285				3.08948	3.9956	7.12678
								8.56255	1.4421	7.61732				7.08341	2.88421	3.92597				7.56255	3.60526	5.04329				7.08341	2.32631	5.23463				8.08341	2.4421	6.23463					3.12511	4.76841	6.61732				3.08341	3.99473	7.13582
								8.55817	1.44173	7.63188				7.07756	2.88347	3.94781				7.55817	3.60434	5.07969				7.07756	2.3252	5.26375				8.07756	2.44173	6.26375					3.11633	4.76694	6.63188				3.07756	3.9939	7.14492
								8.55395	1.44138	7.64653				7.07193	2.88276	3.96979				7.55395	3.60345	5.11631				7.07193	2.32414	5.29305				8.07193	2.44138	6.29305					3.1079	4.76552	6.64653				3.07193	3.9931	7.15408
								8.5499	1.44104	7.66126				7.06654	2.88208	3.99189				7.5499	3.6026	5.15316				7.06654	2.32311	5.32252				8.06654	2.44104	6.32252					3.09981	4.76415	6.66126				3.06654	3.99234	7.16329
								8.54603	1.44071	7.67608				7.06137	2.88142	4.01412				7.54603	3.60178	5.19021				7.06137	2.32214	5.35217				8.06137	2.44071	6.35217					3.09206	4.76285	6.67608				3.06137	3.9916	7.17255
								8.54233	1.4404	7.69098				7.05644	2.8808	4.03647				7.54233	3.601	5.22746				7.05644	2.3212	5.38197				8.05644	2.4404	6.38197					3.08466	4.7616	6.69098				3.05644	3.9909	7.18186
								8.53881	1.4401	7.70596				7.05174	2.88021	4.05894				7.53881	3.60026	5.2649				7.05174	2.32031	5.41192				8.05174	2.4401	6.41192					3.07762	4.76041	6.70596				3.05174	3.99023	7.19122
								8.53546	1.43982	7.72101				7.04728	2.87964	4.08151				7.53546	3.59955	5.30252				7.04728	2.31946	5.44202				8.04728	2.43982	6.44202					3.07092	4.75929	6.72101				3.04728	3.9896	7.20063
								8.53229	1.43955	7.73613				7.04305	2.87911	4.10419				7.53229	3.59889	5.34032				7.04305	2.31866	5.47225				8.04305	2.43955	6.47225					3.06457	4.75822	6.73613				3.04305	3.989	7.21008
								8.52929	1.4393	7.75131				7.03905	2.8786	4.12697				7.52929	3.59826	5.37828				7.03905	2.31791	5.50262				8.03905	2.4393	6.50262					3.05858	4.75721	6.75131				3.03905	3.98843	7.21957
								8.52647	1.43906	7.76655				7.0353	2.87813	4.14983				7.52647	3.59766	5.41639				7.0353	2.31719	5.53311				8.0353	2.43906	6.53311					3.05295	4.75626	6.76655				3.0353	3.9879	7.2291
								8.52383	1.43884	7.78186				7.03178	2.87769	4.17279				7.52383	3.59711	5.45464				7.03178	2.31653	5.56371				8.03178	2.43884	6.56371					3.04767	4.75537	6.78186				3.03178	3.9874	7.23866
								8.52137	1.43864	7.79721				7.0285	2.87727	4.19582				7.52137	3.59659	5.49303				7.0285	2.31591	5.59443				8.0285	2.43864	6.59443					3.04275	4.75454	6.79721				3.0285	3.98693	7.24826
								8.51909	1.43844	7.81262				7.02546	2.87689	4.21893				7.51909	3.59611	5.53155				7.02546	2.31533	5.62524				8.02546	2.43844	6.62524					3.03819	4.75377	6.81262				3.02546	3.9865	7.25789
								8.51699	1.43827	7.82807				7.02266	2.87653	4.24211				7.51699	3.59567	5.57018				7.02266	2.3148	5.65614				8.02266	2.43827	6.65614					3.03399	4.75307	6.82807				3.02266	3.9861	7.26754
								8.51507	1.4381	7.84357				7.0201	2.87621	4.26535				7.51507	3.59526	5.60891				7.0201	2.31431	5.68713				8.0201	2.4381	6.68713					3.03015	4.75242	6.84357				3.0201	3.98574	7.27723
								8.51334	1.43796	7.8591				7.01778	2.87592	4.28865				7.51334	3.5949	5.64775				7.01778	2.31388	5.7182				8.01778	2.43796	6.7182					3.02667	4.75183	6.8591				3.01778	3.98541	7.28694
								8.51178	1.43783	7.87467				7.01571	2.87566	4.312				7.51178	3.59457	5.68667				7.01571	2.31348	5.74933				8.01571	2.43783	6.74933					3.02356	4.75131	6.87467				3.01571	3.98511	7.29667
								8.51041	1.43771	7.89027				7.01388	2.87542	4.3354				7.51041	3.59428	5.72566				7.01388	2.31314	5.78053				8.01388	2.43771	6.78053					3.02082	4.75085	6.89027				3.01388	3.98485	7.30642
								8.50922	1.43761	7.90589				7.01229	2.87522	4.35884				7.50922	3.59403	5.76473				7.01229	2.31283	5.81178				8.01229	2.43761	6.81178					3.01843	4.75045	6.90589				3.01229	3.98463	7.31618
								8.50821	1.43753	7.92154				7.01094	2.87505	4.38231				7.50821	3.59382	5.80385				7.01094	2.31258	5.84308				8.01094	2.43753	6.84308					3.01642	4.75011	6.92154				3.01094	3.98443	7.32596
								8.50738	1.43746	7.93721				7.00984	2.87491	4.40581				7.50738	3.59364	5.84302				7.00984	2.31237	5.87442				8.00984	2.43746	6.87442					3.01476	4.74983	6.93721				3.00984	3.98428	7.33576
								8.50674	1.4374	7.95289				7.00899	2.87481	4.42934				7.50674	3.59351	5.88223				7.00899	2.31221	5.90579				8.00899	2.4374	6.90579					3.01348	4.74961	6.95289				3.00899	3.98416	7.34556
								8.50628	1.43736	7.96859				7.00837	2.87473	4.45288				7.50628	3.59341	5.92147				7.00837	2.31209	5.93718				8.00837	2.43736	6.93718					3.01256	4.74946	6.96859				3.00837	3.98407	7.35537
								8.50601	1.43734	7.98429				7.00801	2.87468	4.47644				7.50601	3.59335	5.96073				7.00801	2.31202	5.96859				8.00801	2.43734	6.96859					3.01201	4.74936	6.98429				3.00801	3.98402	7.36518
								8.50591	1.43733	8				7.00789	2.87467	4.5				7.50591	3.59333	6				7.00789	2.312	6				8.00789	2.43733	7					3.01183	4.74933	7				3.00789	3.984	7.375
								8.50601	1.43734	8.01571				7.00801	2.87468	4.52356				7.50601	3.59335	6.03927				7.00801	2.31202	6.03141				8.00801	2.43734	7.03141					3.01201	4.74936	7.01571				3.00801	3.98402	7.38482
								8.50628	1.43736	8.03141				7.00837	2.87473	4.54712				7.50628	3.59341	6.07853				7.00837	2.31209	6.06282				8.00837	2.43736	7.06282					3.01256	4.74946	7.03141				3.00837	3.98407	7.39463
								8.50674	1.4374	8.04711				7.00899	2.87481	4.57066				7.50674	3.59351	6.11777				7.00899	2.31221	6.09421				8.00899	2.4374	7.09421					3.01348	4.74961	7.04711				3.00899	3.98416	7.40444
								8.50738	1.43746	8.06279				7.00984	2.87491	4.59419				7.50738	3.59364	6.15698				7.00984	2.31237	6.12558				8.00984	2.43746	7.12558					3.01476	4.74983	7.06279				3.00984	3.98428	7.41424
								8.50821	1.43753	8.07846				7.01094	2.87505	4.61769				7.50821	3.59382	6.19615				7.01094	2.31258	6.15692				8.01094	2.43753	7.15692					3.01642	4.75011	7.07846				3.01094	3.98443	7.42404
								8.50922	1.43761	8.09411				7.01229	2.87522	4.64116				7.50922	3.59403	6.23527				7.01229	2.31283	6.18822				8.01229	2.43761	7.18822					3.01843	4.75045	7.09411				3.01229	3.98463	7.43382
								8.51041	1.43771	8.10973				7.01388	2.87542	4.6646				7.51041	3.59428	6.27434				7.01388	2.31314	6.21947				8.01388	2.43771	7.21947					3.02082	4.75085	7.10973				3.01388	3.98485	7.44358
								8.51178	1.43783	8.12533				7.01571	2.87566	4.688				7.51178	3.59457	6.31333				7.01571	2.31348	6.25067				8.01571	2.43783	7.25067					3.02356	4.75131	7.12533				3.01571	3.98511	7.45333
								8.51334	1.43796	8.1409				7.01778	2.87592	4.71135				7.51334	3.5949	6.35225				7.01778	2.31388	6.2818				8.01778	2.43796	7.2818					3.02667	4.75183	7.1409				3.01778	3.98541	7.46306
								8.51507	1.4381	8.15643				7.0201	2.87621	4.73465				7.51507	3.59526	6.39109				7.0201	2.31431	6.31287				8.0201	2.4381	7.31287					3.03015	4.75242	7.15643				3.0201	3.98574	7.47277
								8.51699	1.43827	8.17193				7.02266	2.87653	4.75789				7.51699	3.59567	6.42982				7.02266	2.3148	6.34386				8.02266	2.43827	7.34386					3.03399	4.75307	7.17193				3.02266	3.9861	7.48246
								8.51909	1.43844	8.18738				7.02546	2.87689	4.78107				7.51909	3.59611	6.46845				7.02546	2.31533	6.37476				8.02546	2.43844	7.37476					3.03819	4.75377	7.18738				3.02546	3.9865	7.49211
								8.52137	1.43864	8.20279				7.0285	2.87727	4.80418				7.52137	3.59659	6.50697				7.0285	2.31591	6.40557				8.0285	2.43864	7.40557					3.04275	4.75454	7.20279				3.0285	3.98693	7.50174
								8.52383	1.43884	8.21814				7.03178	2.87769	4.82721				7.52383	3.59711	6.54536				7.03178	2.31653	6.43629				8.03178	2.43884	7.43629					3.04767	4.75537	7.21814				3.03178	3.9874	7.51134
								8.52647	1.43906	8.23345				7.0353	2.87813	4.85017				7.52647	3.59766	6.58361				7.0353	2.31719	6.46689				8.0353	2.43906	7.46689					3.05295	4.75626	7.23345				3.0353	3.9879	7.5209
								8.52929	1.4393	8.24869				7.03905	2.8786	4.87303				7.52929	3.59826	6.62172				7.03905	2.31791	6.49738				8.03905	2.4393	7.49738					3.05858	4.75721	7.24869				3.03905	3.98843	7.53043
								8.53229	1.43955	8.26387				7.04305	2.87911	4.89581				7.53229	3.59889	6.65968				7.04305	2.31866	6.52775				8.04305	2.43955	7.52775					3.06457	4.75822	7.26387				3.04305	3.989	7.53992
								8.53546	1.43982	8.27899				7.04728	2.87964	4.91849				7.53546	3.59955	6.69748				7.04728	2.31946	6.55798				8.04728	2.43982	7.55798					3.07092	4.75929	7.27899				3.04728	3.9896	7.54937
								8.53881	1.4401	8.29404				7.05174	2.88021	4.94106				7.53881	3.60026	6.7351				7.05174	2.32031	6.58808				8.05174	2.4401	7.58808					3.07762	4.76041	7.29404				3.05174	3.99023	7.55878
								8.54233	1.4404	8.30902				7.05644	2.8808	4.96353				7.54233	3.601	6.77254				7.05644	2.3212	6.61803				8.05644	2.4404	7.61803					3.08466	4.7616	7.30902				3.05644	3.9909	7.56814
								8.54603	1.44071	8.32392				7.06137	2.88142	4.98588				7.54603	3.60178	6.80979				7.06137	2.32214	6.64783				8.06137	2.44071	7.64783					3.09206	4.76285	7.32392				3.06137	3.9916	7.57745
								8.5499	1.44104	8.33874				7.06654	2.88208	5.00811				7.5499	3.6026	6.84684				7.06654	2.32311	6.67748				8.06654	2.44104	7.67748					3.09981	4.76415	7.33874				3.06654	3.99234	7.58671
								8.55395	1.44138	8.35347				7.07193	2.88276	5.03021				7.55395	3.60345	6.88369				7.07193	2.32414	6.70695				8.07193	2.44138	7.70695					3.1079	4.76552	7.35347				3.07193	3.9931	7.59592
								8.55817	1.44173	8.36812				7.07756	2.88347	5.05219				7.55817	3.60434	6.92031				7.07756	2.3252	6.73625				8.07756	2.44173	7.73625					3.11633	4.76694	7.36812				3.07756	3.9939	7.60508
								8.56255	1.4421	8.38268				7.08341	2.88421	5.07403				7.56255	3.60526	6.95671				7.08341	2.32631	6.76537				8.08341	2.4421	7.76537					3.12511	4.76841	7.38268				3.08341	3.99473	7.61418
								8.56711	1.44249	8.39715				7.08948	2.88497	5.09572				7.56711	3.60622	6.99287				7.08948	2.32746	6.7943				8.08948	2.44249	7.7943					3.13422	4.76995	7.39715				3.08948	3.9956	7.62322
								8.57184	1.44289	8.41151				7.09578	2.88577	5.11727				7.57184	3.60721	7.02879				7.09578	2.32866	6.82303				8.09578	2.44289	7.82303					3.14368	4.77154	7.41151				3.09578	3.99649	7.6322
								8.57673	1.4433	8.42578				7.10231	2.8866	5.13867				7.57673	3.60824	7.06445				7.10231	2.32989	6.85156				8.10231	2.4433	7.85156					3.15346	4.77319	7.42578				3.10231	3.99742	7.64111
								8.58179	1.44372	8.43994				7.10905	2.88745	5.15991				7.58179	3.60931	7.09985				7.10905	2.33117	6.87988				8.10905	2.44372	7.87988					3.16358	4.77489	7.43994				3.10905	3.99838	7.64996
								8.58701	1.44416	8.45399				7.11602	2.88833	5.18099				7.58701	3.61041	7.13498				7.11602	2.33249	6.90798				8.11602	2.44416	7.90798					3.17403	4.77665	7.45399				3.11602	3.99937	7.65874
								8.5924	1.44462	8.46793				7.1232	2.88923	5.20189				7.5924	3.61154	7.16982				7.1232	2.33385	6.93586				8.1232	2.44462	7.93586					3.1848	4.77847	7.46793				3.1232	4.00039	7.66746
								8.59795	1.44508	8.48175				7.1306	2.89017	5.22263				7.59795	3.61271	7.20438				7.1306	2.33525	6.96351				8.1306	2.44508	7.96351					3.1959	4.78034	7.48175				3.1306	4.00144	7.6761
								8.60366	1.44557	8.49546				7.13822	2.89113	5.24319				7.60366	3.61391	7.23865				7.13822	2.3367	6.99092				8.13822	2.44557	7.99092					3.20733	4.78226	7.49546				3.13822	4.00252	7.68466
								8.60953	1.44606	8.50904				7.14605	2.89212	5.26356				7.60953	3.61515	7.2726				7.14605	2.33818	7.01808				8.14605	2.44606	8.01808					3.21907	4.78424	7.50904				3.14605	4.00364	7.69315
								8.61556	1.44657	8.5225				7.15408	2.89314	5.28375				7.61556	3.61642	7.30625				7.15408	2.3397	7.045				8.15408	2.44657	8.045					3.23112	4.78627	7.5225				3.15408	4.00478	7.70156
								8.62175	1.44709	8.53583				7.16233	2.89418	5.30374				7.62175	3.61772	7.33957				7.16233	2.34127	7.07165				8.16233	2.44709	8.07165					3.24349	4.78836	7.53583				3.16233	4.00595	7.70989
								8.62809	1.44762	8.54902				7.17078	2.89525	5.32353				7.62809	3.61906	7.37256				7.17078	2.34287	7.09805				8.17078	2.44762	8.09805					3.25617	4.79049	7.54902				3.17078	4.00715	7.71814
								8.63458	1.44817	8.56208				7.17944	2.89634	5.34313				7.63458	3.62042	7.40521				7.17944	2.34451	7.12417				8.17944	2.44817	8.12417					3.26916	4.79268	7.56208				3.17944	4.00838	7.7263
								8.64123	1.44873	8.57501				7.1883	2.89746	5.36251				7.64123	3.62182	7.43751				7.1883	2.34619	7.15001				8.1883	2.44873	8.15001					3.28245	4.79492	7.57501				3.1883	4.00964	7.73438
								8.64802	1.4493	8.58779				7.19736	2.8986	5.38168				7.64802	3.62325	7.46946				7.19736	2.3479	7.17557				8.19736	2.4493	8.17557					3.29604	4.79721	7.58779				3.19736	4.01093	7.74237
								8.65497	1.44989	8.60042				7.20662	2.89977	5.40063				7.65497	3.62472	7.50105				7.20662	2.34966	7.20084				8.20662	2.44989	8.20084					3.30993	4.79955	7.60042				3.20662	4.01224	7.75026
								8.66206	1.45048	8.61291				7.21608	2.90097	5.41936				7.66206	3.62621	7.53227				7.21608	2.35145	7.22581				8.21608	2.45048	8.22581					3.32411	4.80193	7.61291				3.21608	4.01359	7.75807
								8.66929	1.45109	8.62524				7.22572	2.90219	5.43786				7.66929	3.62773	7.56311				7.22572	2.35328	7.25049				8.22572	2.45109	8.25049					3.33859	4.80437	7.62524				3.22572	4.01496	7.76578
								8.67667	1.45171	8.63742				7.23556	2.90343	5.45614				7.67667	3.62929	7.59356				7.23556	2.35514	7.27485				8.23556	2.45171	8.27485					3.35334	4.80686	7.63742				3.23556	4.01636	7.77339
								8.68419	1.45235	8.64945				7.24559	2.9047	5.47417				7.68419	3.63087	7.62362				7.24559	2.35704	7.2989				8.24559	2.45235	8.2989					3.36839	4.80939	7.64945				3.24559	4.01778	7.78091
								8.69185	1.45299	8.66131				7.2558	2.90599	5.49197				7.69185	3.63248	7.65328				7.2558	2.35898	7.32262				8.2558	2.45299	8.32262					3.38371	4.81197	7.66131				3.2558	4.01923	7.78832
								8.69965	1.45365	8.67301				7.2662	2.9073	5.50952				7.69965	3.63412	7.68253				7.2662	2.36095	7.34603				8.2662	2.45365	8.34603					3.3993	4.8146	7.67301				3.2662	4.02071	7.79563
								8.70758	1.45432	8.68455				7.27678	2.90864	5.52682				7.70758	3.6358	7.71137				7.27678	2.36295	7.36909				8.27678	2.45432	8.36909					3.41517	4.81727	7.68455				3.27678	4.02222	7.80284
								8.71565	1.455	8.69591				7.28754	2.90999	5.54387				7.71565	3.63749	7.73978				7.28754	2.36499	7.39183				8.28754	2.455	8.39183					3.4313	4.81999	7.69591				3.28754	4.02374	7.80995
								8.72385	1.45569	8.70711				7.29847	2.91138	5.56066				7.72385	3.63922	7.76777				7.29847	2.36706	7.41421				8.29847	2.45569	8.41421					3.4477	4.82275	7.70711				3.29847	4.0253	7.81694
								8.73218	1.45639	8.71813				7.30957	2.91278	5.57719				7.73218	3.64097	7.79532				7.30957	2.36917	7.43625				8.30957	2.45639	8.43625					3.46436	4.82556	7.71813				3.30957	4.02688	7.82383
								8.74064	1.4571	8.72897				7.32085	2.9142	5.59345				7.74064	3.64275	7.82242				7.32085	2.37131	7.45794				8.32085	2.4571	8.45794					3.48128	4.82841	7.72897				3.32085	4.02848	7.83061
								8.74922	1.45782	8.73963				7.33229	2.91565	5.60945				7.74922	3.64456	7.84908				7.33229	2.37347	7.47926				8.33229	2.45782	8.47926					3.49844	4.8313	7.73963				3.33229	4.03011	7.83727
								8.75793	1.45856	8.75011				7.3439	2.91712	5.62517				7.75793	3.64639	7.87528				7.3439	2.37567	7.50022				8.3439	2.45856	8.50022					3.51585	4.83423	7.75011				3.3439	4.03176	7.84382
								8.76675	1.4593	8.76041				7.35567	2.9186	5.64061				7.76675	3.64825	7.90101				7.35567	2.3779	7.52081				8.35567	2.4593	8.52081					3.53351	4.83721	7.76041				3.35567	4.03343	7.85025
								8.7757	1.46005	8.77051				7.3676	2.92011	5.65577				7.7757	3.65014	7.92628				7.3676	2.38016	7.54103				8.3676	2.46005	8.54103					3.5514	4.84022	7.77051				3.3676	4.03512	7.85657
								8.78477	1.46082	8.78043				7.37969	2.92164	5.67065				7.78477	3.65205	7.95108				7.37969	2.38245	7.56086				8.37969	2.46082	8.56086					3.56953	4.84327	7.78043				3.37969	4.03684	7.86277
								8.79394	1.46159	8.79016				7.39193	2.92318	5.68523				7.79394	3.65398	7.97539				7.39193	2.38477	7.58031				8.39193	2.46159	8.58031					3.58789	4.84636	7.79016				3.39193	4.03858	7.86885
								8.80324	1.46237	8.79968				7.40431	2.92475	5.69953				7.80324	3.65593	7.99921				7.40431	2.38712	7.59937				8.40431	2.46237	8.59937					3.60647	4.84949	7.79968				3.40431	4.04034	7.8748
								8.81264	1.46317	8.80902				7.41685	2.92633	5.71353				7.81264	3.65791	8.02254				7.41685	2.3895	7.61803				8.41685	2.46317	8.61803					3.62527	4.85266	7.80902				3.41685	4.04212	7.88064
								8.82215	1.46397	8.81815				7.42953	2.92793	5.72722				7.82215	3.65992	8.04537				7.42953	2.3919	7.6363				8.42953	2.46397	8.6363					3.64429	4.85587	7.81815				3.42953	4.04392	7.88634
								8.83176	1.46478	8.82708				7.44235	2.92955	5.74062				7.83176	3.66194	8.0677				7.44235	2.39433	7.65416				8.44235	2.46478	8.65416					3.66352	4.8591	7.82708				3.44235	4.04575	7.89193
								8.84148	1.46559	8.83581				7.45531	2.93119	5.75371				7.84148	3.66399	8.08952				7.45531	2.39678	7.67161				8.45531	2.46559	8.67161					3.68296	4.86238	7.83581				3.45531	4.04759	7.89738
								8.8513	1.46642	8.84433				7.4684	2.93284	5.76649				7.8513	3.66605	8.11082				7.4684	2.39926	7.68866				8.4684	2.46642	8.68866					3.7026	4.86569	7.84433				3.4684	4.04945	7.9027
								8.86122	1.46726	8.85264				7.48162	2.93451	5.77896				7.86122	3.66814	8.1316				7.48162	2.40177	7.70528				8.48162	2.46726	8.70528					3.72243	4.86903	7.85264				3.48162	4.05133	7.9079
								8.87123	1.4681	8.86074				7.49497	2.9362	5.79111				7.87123	3.67025	8.15186				7.49497	2.4043	7.72148				8.49497	2.4681	8.72148					3.74246	4.8724	7.86074				3.49497	4.05323	7.91296
								8.88134	1.46895	8.86863				7.50845	2.9379	5.80295				7.88134	3.67238	8.17158				7.50845	2.40685	7.73726				8.50845	2.46895	8.73726					3.76267	4.87581	7.86863				3.50845	4.05514	7.91789
								8.89153	1.46981	8.87631				7.52205	2.93962	5.81446				7.89153	3.67453	8.19077				7.52205	2.40943	7.75261				8.52205	2.46981	8.75261					3.78307	4.87924	7.87631				3.52205	4.05707	7.92269
								8.90182	1.47068	8.88377				7.53576	2.94135	5.82565				7.90182	3.67669	8.20941				7.53576	2.41203	7.76753				8.53576	2.47068	8.76753					3.80364	4.88271	7.88377				3.53576	4.05902	7.92735
								8.91219	1.47155	8.89101				7.54959	2.9431	5.83651				7.91219	3.67887	8.22752				7.54959	2.41465	7.78201				8.54959	2.47155	8.78201					3.82438	4.8862	7.89101				3.54959	4.06099	7.93188
								8.92265	1.47243	8.89803				7.56353	2.94486	5.84704				7.92265	3.68108	8.24507				7.56353	2.41729	7.79606				8.56353	2.47243	8.79606					3.84529	4.88972	7.89803				3.56353	4.06297	7.93627
								8.93318	1.47332	8.90483				7.57758	2.94664	5.85724				7.93318	3.68329	8.26207				7.57758	2.41995	7.80965				8.57758	2.47332	8.80965					3.86637	4.89327	7.90483				3.57758	4.06497	7.94052
								8.9438	1.47421	8.9114				7.59173	2.94842	5.8671				7.9438	3.68553	8.27851				7.59173	2.42264	7.82281				8.59173	2.47421	8.82281					3.8876	4.89685	7.9114				3.59173	4.06698	7.94463
								8.95449	1.47511	8.91775				7.60598	2.95022	5.87663				7.95449	3.68778	8.29439				7.60598	2.42534	7.83551				8.60598	2.47511	8.83551					3.90898	4.90045	7.91775				3.60598	4.069	7.9486
								8.96525	1.47602	8.92388				7.62033	2.95204	5.88582				7.96525	3.69005	8.3097				7.62033	2.42806	7.84776				8.62033	2.47602	8.84776					3.9305	4.90407	7.92388				3.62033	4.07104	7.95242
								8.97608	1.47693	8.92978				7.63478	2.95386	5.89466				7.97608	3.69233	8.32444				7.63478	2.43079	7.85955				8.63478	2.47693	8.85955					3.95217	4.90772	7.92978				3.63478	4.07309	7.95611
								8.98698	1.47785	8.93544				7.64931	2.9557	5.90317				7.98698	3.69462	8.33861				7.64931	2.43355	7.87089				8.64931	2.47785	8.87089					3.97397	4.9114	7.93544				3.64931	4.07516	7.95965
								8.99795	1.47877	8.94088				7.66393	2.95754	5.91132				7.99795	3.69693	8.3522				7.66393	2.43632	7.88176				8.66393	2.47877	8.88176					3.9959	4.91509	7.94088				3.66393	4.07724	7.96305
								9.00898	1.4797	8.94609				7.67864	2.9594	5.91913				8.00898	3.69925	8.36521				7.67864	2.4391	7.89217				8.67864	2.4797	8.89217					4.01796	4.9188	7.94609				3.67864	4.07933	7.9663
								9.02006	1.48063	8.95106				7.69342	2.96127	5.92658				8.02006	3.70159	8.37764				7.69342	2.4419	7.90211				8.69342	2.48063	8.90211					4.04013	4.92254	7.95106				3.69342	4.08143	7.96941
								9.03121	1.48157	8.95579				7.70828	2.96315	5.93369				8.03121	3.70393	8.38948				7.70828	2.44472	7.91159				8.70828	2.48157	8.91159					4.06242	4.92629	7.95579				3.70828	4.08354	7.97237
								9.04241	1.48252	8.96029				7.72321	2.96503	5.94044				8.04241	3.70629	8.40073				7.72321	2.44755	7.92059				8.72321	2.48252	8.92059					4.08481	4.93007	7.96029				3.72321	4.08566	7.97518
								9.05366	1.48346	8.96456				7.73821	2.96693	5.94684				8.05366	3.70866	8.41139				7.73821	2.45039	7.92911				8.73821	2.48346	8.92911					4.10731	4.93386	7.96456				3.73821	4.08779	7.97785
								9.06495	1.48442	8.96858				7.75327	2.96883	5.95287				8.06495	3.71104	8.42146				7.75327	2.45325	7.93717				8.75327	2.48442	8.93717					4.12991	4.93766	7.96858				3.75327	4.08993	7.98036
								9.0763	1.48537	8.97237				7.7684	2.97074	5.95855				8.0763	3.71343	8.43092				7.7684	2.45611	7.94474				8.7684	2.48537	8.94474					4.15259	4.94148	7.97237				3.7684	4.09208	7.98273
								9.08768	1.48633	8.97592				7.78358	2.97266	5.96388				8.08768	3.71582	8.43979				7.78358	2.45899	7.95183				8.78358	2.48633	8.95183					4.17537	4.94532	7.97592				3.78358	4.09424	7.98495
								9.09911	1.48729	8.97922				7.79881	2.97458	5.96883				8.09911	3.71823	8.44806				7.79881	2.46188	7.95845				8.79881	2.48729	8.95845					4.19822	4.94917	7.97922				3.79881	4.09641	7.98701
								9.11057	1.48826	8.98229				7.8141	2.97651	5.97343				8.11057	3.72064	8.45572				7.8141	2.46477	7.96457				8.8141	2.48826	8.96457					4.22114	4.95303	7.98229				3.8141	4.09858	7.98893
								9.12207	1.48923	8.98511				7.82943	2.97845	5.97766				8.12207	3.72306	8.46277				7.82943	2.46768	7.97022				8.82943	2.48923	8.97022					4.24414	4.9569	7.98511				3.82943	4.10076	7.99069
								9.1336	1.4902	8.98769				7.8448	2.98039	5.98153				8.1336	3.72549	8.46922				7.8448	2.47059	7.97538				8.8448	2.4902	8.97538					4.2672	4.96079	7.98769				3.8448	4.10294	7.99231
								9.14516	1.49117	8.99002				7.86021	2.98234	5.98504				8.14516	3.72793	8.47506				7.86021	2.47351	7.98005				8.86021	2.49117	8.98005					4.29031	4.96468	7.99002				3.86021	4.10513	7.99376
								9.15674	1.49215	8.99211				7.87566	2.98429	5.98817				8.15674	3.73036	8.48029				7.87566	2.47644	7.98423				8.87566	2.49215	8.98423					4.31348	4.96858	7.99211				3.87566	4.10733	7.99507
								9.16835	1.49312	8.99396				7.89113	2.98625	5.99094				8.16835	3.73281	8.4849				7.89113	2.47937	7.98792				8.89113	2.49312	8.98792					4.3367	4.97249	7.99396				3.89113	4.10953	7.99623
								9.17998	1.4941	8.99556				7.90663	2.98821	5.99334				8.17998	3.73526	8.4889				7.90663	2.48231	7.99112				8.90663	2.4941	8.99112					4.35995	4.97641	7.99556				3.90663	4.11173	7.99723
								9.19162	1.49508	8.99692				7.92216	2.99017	5.99538				8.19162	3.73771	8.49229				7.92216	2.48525	7.99383				8.92216	2.49508	8.99383					4.38324	4.98033	7.99692				3.92216	4.11394	7.99807
								9.20328	1.49607	8.99803				7.9377	2.99213	5.99704				8.20328	3.74016	8.49507				7.9377	2.4882	7.99605				8.9377	2.49607	8.99605					4.40656	4.98426	7.99803				3.9377	4.11615	7.99877
								9.21495	1.49705	8.99889				7.95326	2.9941	5.99833				8.21495	3.74262	8.49722				7.95326	2.49114	7.99778				8.95326	2.49705	8.99778					4.4299	4.98819	7.99889				3.95326	4.11836	7.99931
								9.22663	1.49803	8.99951				7.96884	2.99606	5.99926				8.22663	3.74508	8.49877				7.96884	2.49409	7.99901				8.96884	2.49803	8.99901					4.45326	4.99213	7.99951				3.96884	4.12057	7.99969
								9.23831	1.49902	8.99988				7.98442	2.99803	5.99981				8.23831	3.74754	8.49969				7.98442	2.49705	7.99975				8.98442	2.49902	8.99975					4.47662	4.99606	7.99988				3.98442	4.12279	7.99992
								9.25	1.5	9				8	3	6				8.25	3.75	8.5				8	2.5	8				9	2.5	9					4.5	5	8				4	4.125	8
								9.25	1.5	7				8	3	3				8.25	3.75	3.5				8	2.5	4				9	2.5	5					4.5	5	6				4	4.125	6.75
								9.23836	1.49877	7.00012				7.98449	2.99754	3.00019				8.23836	3.74693	3.50031				7.98449	2.49631	4.00025				8.98449	2.49877	5.00025					4.47673	4.99509	6.00012				3.98449	4.12224	6.75008
								9.22673	1.49754	7.00049				7.96898	2.99509	3.00074				8.22673	3.74386	3.50123				7.96898	2.49263	4.00099				8.96898	2.49754	5.00099					4.45346	4.99017	6.00049				3.96898	4.11947	6.75031
								9.21511	1.49632	7.00111				7.95347	2.99263	3.00167				8.21511	3.74079	3.50278				7.95347	2.48895	4.00222				8.95347	2.49632	5.00222					4.43021	4.98526	6.00111				3.95347	4.11671	6.75069
								9.20349	1.49509	7.00197				7.93798	2.99018	3.00296				8.20349	3.73772	3.50493				7.93798	2.48527	4.00395				8.93798	2.49509	5.00395					4.40697	4.98035	6.00197				3.93798	4.11395	6.75123
								9.19188	1.49386	7.00308				7.92251	2.98773	3.00462				8.19188	3.73466	3.50771				7.92251	2.48159	4.00617				8.92251	2.49386	5.00617					4.38376	4.97545	6.00308				3.92251	4.11119	6.75193
								9.18029	1.49264	7.00444				7.90705	2.98528	3.00666				8.18029	3.7316	3.5111				7.90705	2.47792	4.00888				8.90705	2.49264	5.00888					4.36058	4.97056	6.00444				3.90705	4.10844	6.75277
								9.16871	1.49142	7.00604				7.89162	2.98283	3.00906				8.16871	3.72854	3.5151				7.89162	2.47425	4.01208				8.89162	2.49142	5.01208					4.33743	4.96567	6.00604				3.89162	4.10569	6.75377
								9.15716	1.4902	7.00789				7.87621	2.98039	3.01183				8.15716	3.72549	3.51971				7.87621	2.47059	4.01577				8.87621	2.4902	5.01577					4.31431	4.96079	6.00789				3.87621	4.10294	6.75493
								9.14563	1.48898	7.00998				7.86083	2.97796	3.01496				8.14563	3.72245	3.52494				7.86083	2.46694	4.01995				8.86083	2.48898	5.01995					4.29125	4.95592	6.00998				3.86083	4.1002	6.75624
								9.13412	1.48776	7.01231				7.84549	2.97553	3.01847				8.13412	3.71941	3.53078				7.84549	2.46329	4.02462				8.84549	2.48776	5.02462					4.26824	4.95106	6.01231				3.84549	4.09747	6.75769
								9.12264	1.48655	7.01489				7.83019	2.9731	3.02234				8.12264	3.71638	3.53723				7.83019	2.45966	4.02978				8.83019	2.48655	5.02978					4.24528	4.94621	6.01489				3.83019	4.09474	6.75931
								9.11119	1.48534	7.01771				7.81493	2.97069	3.02657				8.11119	3.71336	3.54428				7.81493	2.45603	4.03543				8.81493	2.48534	5.03543					4.22239	4.94137	6.01771				3.81493	4.09202	6.76107
								9.09978	1.48414	7.02078				7.79971	2.96828	3.03117				8.09978	3.71035	3.55194				7.79971	2.45242	4.04155				8.79971	2.48414	5.04155					4.19956	4.93655	6.02078				3.79971	4.08931	6.76299
								9.08841	1.48294	7.02408				7.78454	2.96587	3.03612				8.08841	3.70734	3.56021				7.78454	2.44881	4.04817				8.78454	2.48294	5.04817					4.17681	4.93175	6.02408				3.78454	4.08661	6.76505
								9.07707	1.48174	7.02763				7.76943	2.96348	3.04145				8.07707	3.70435	3.56908				7.76943	2.44522	4.05526				8.76943	2.48174	5.05526					4.15414	4.92696	6.02763				3.76943	4.08392	6.76727
								9.06578	1.48055	7.03142				7.75437	2.9611	3.04713				8.06578	3.70137	3.57854				7.75437	2.44164	4.06283				8.75437	2.48055	5.06283					4.13156	4.92219	6.03142				3.75437	4.08123	6.76964
								9.05453	1.47936	7.03544				7.73938	2.95872	3.05316				8.05453	3.6984	3.58861				7.73938	2.43808	4.07089				8.73938	2.47936	5.07089					4.10906	4.91744	6.03544				3.73938	4.07856	6.77215
								9.04333	1.47818	7.03971				7.72444	2.95636	3.05956				8.04333	3.69545	3.59927				7.72444	2.43453	4.07941				8.72444	2.47818	5.07941					4.08667	4.91271	6.03971				3.72444	4.0759	6.77482
								9.03218	1.477	7.04421				7.70958	2.954	3.06631				8.03218	3.6925	3.61052				7.70958	2.431	4.08841				8.70958	2.477	5.08841					4.06437	4.908	6.04421				3.70958	4.07325	6.77763
								9.02109	1.47583	7.04894				7.69479	2.95166	3.07342				8.02109	3.68957	3.62236				7.69479	2.42749	4.09789				8.69479	2.47583	5.09789					4.04218	4.90332	6.04894				3.69479	4.07062	6.78059
								9.01005	1.47466	7.05391				7.68007	2.94933	3.08087				8.01005	3.68666	3.63479				7.68007	2.42399	4.10783				8.68007	2.47466	5.10783					4.02011	4.89866	6.05391				3.68007	4.06799	6.7837
								8.99907	1.4735	7.05912				7.66543	2.94701	3.08868				7.99907	3.68376	3.6478				7.66543	2.42051	4.11824				8.66543	2.4735	5.11824					3.99815	4.89402	6.05912				3.66543	4.06539	6.78695
								8.98816	1.47235	7.06456				7.65088	2.9447	3.09683				7.98816	3.68088	3.66139				7.65088	2.41706	4.12911				8.65088	2.47235	5.12911					3.97632	4.88941	6.06456				3.65088	4.06279	6.79035
								8.97731	1.47121	7.07022				7.63641	2.94241	3.10534				7.97731	3.67802	3.67556				7.63641	2.41362	4.14045				8.63641	2.47121	5.14045					3.95461	4.88483	6.07022				3.63641	4.06021	6.79389
								8.96652	1.47007	7.07612				7.62203	2.94014	3.11418				7.96652	3.67517	3.6903				7.62203	2.4102	4.15224				8.62203	2.47007	5.15224					3.93304	4.88027	6.07612				3.62203	4.05765	6.79758
								8.95581	1.46894	7.08225				7.60774	2.93787	3.12337				7.95581	3.67234	3.70561				7.60774	2.40681	4.16449				8.60774	2.46894	5.16449					3.91161	4.87574	6.08225				3.60774	4.05511	6.8014
								8.94516	1.46781	7.0886				7.59355	2.93562	3.1329				7.94516	3.66953	3.72149				7.59355	2.40344	4.17719				8.59355	2.46781	5.17719					3.89033	4.87125	6.0886				3.59355	4.05258	6.80537
								8.9346	1.4667	7.09517				7.57946	2.93339	3.14276				7.9346	3.66674	3.73793				7.57946	2.40009	4.19035				8.57946	2.4667	5.19035					3.86919	4.86679	6.09517				3.57946	4.05007	6.80948
								8.92411	1.46559	7.10197				7.56548	2.93118	3.15296				7.92411	3.66397	3.75493				7.56548	2.39677	4.20394				8.56548	2.46559	5.20394					3.84822	4.86236	6.10197				3.56548	4.04758	6.81373
								8.9137	1.46449	7.10899				7.5516	2.92898	3.16349				7.9137	3.66123	3.77248				7.5516	2.39347	4.21799				8.5516	2.46449	5.21799					3.8274	4.85796	6.10899				3.5516	4.0451	6.81812
								8.90337	1.4634	7.11623				7.53783	2.9268	3.17435				7.90337	3.6585	3.79059				7.53783	2.3902	4.23247				8.53783	2.4634	5.23247					3.80675	4.8536	6.11623				3.53783	4.04265	6.82265
								8.89313	1.46232	7.12369				7.52418	2.92464	3.18554				7.89313	3.6558	3.80923				7.52418	2.38696	4.24739				8.52418	2.46232	5.24739					3.78627	4.84927	6.12369				3.52418	4.04022	6.82731
								8.88298	1.46125	7.13137				7.51064	2.92249	3.19705				7.88298	3.65312	3.82842				7.51064	2.38374	4.26274				8.51064	2.46125	5.26274					3.76596	4.84499	6.13137				3.51064	4.0378	6.83211
								8.87292	1.46018	7.13926				7.49723	2.92037	3.20889				7.87292	3.65046	3.84814				7.49723	2.38055	4.27852				8.49723	2.46018	5.27852					3.74584	4.84074	6.13926				3.49723	4.03541	6.83704
								8.86295	1.45913	7.14736				7.48393	2.91826	3.22104				7.86295	3.64783	3.8684				7.48393	2.37739	4.29472				8.48393	2.45913	5.29472					3.7259	4.83653	6.14736				3.48393	4.03305	6.8421
								8.85308	1.45809	7.15567				7.47077	2.91618	3.23351				7.85308	3.64522	3.88918				7.47077	2.37427	4.31134				8.47077	2.45809	5.31134					3.70616	4.83236	6.15567				3.47077	4.0307	6.8473
								8.8433	1.45706	7.16419				7.45774	2.91411	3.24629				7.8433	3.64264	3.91048				7.45774	2.37117	4.32839				8.45774	2.45706	5.32839					3.6866	4.82823	6.16419				3.45774	4.02838	6.85262
								8.83363	1.45604	7.17292				7.44484	2.91207	3.25938				7.83363	3.64009	3.9323				7.44484	2.36811	4.34584				8.44484	2.45604	5.34584					3.66726	4.82414	6.17292				3.44484	4.02608	6.85807
								8.82406	1.45502	7.18185				7.43207	2.91005	3.27278				7.82406	3.63756	3.95463				7.43207	2.36507	4.3637				8.43207	2.45502	5.3637					3.64811	4.8201	6.18185				3.43207	4.02381	6.86366
								8.81459	1.45403	7.19098				7.41945	2.90805	3.28647				7.81459	3.63506	3.97746				7.41945	2.36208	4.38197				8.41945	2.45403	5.38197					3.62918	4.8161	6.19098				3.41945	4.02156	6.86936
								8.80523	1.45304	7.20032				7.40697	2.90607	3.30047				7.80523	3.63259	4.00079				7.40697	2.35911	4.40063				8.40697	2.45304	5.40063					3.61046	4.81215	6.20032				3.40697	4.01933	6.8752
								8.79598	1.45206	7.20984				7.39464	2.90412	3.31477				7.79598	3.63015	4.02461				7.39464	2.35618	4.41969				8.39464	2.45206	5.41969					3.59196	4.80824	6.20984				3.39464	4.01714	6.88115
								8.78684	1.4511	7.21957				7.38246	2.90219	3.32935				7.78684	3.62774	4.04892				7.38246	2.35329	4.43914				8.38246	2.4511	5.43914					3.57368	4.80438	6.21957				3.38246	4.01496	6.88723
								8.77782	1.45014	7.22949				7.37042	2.90028	3.34423				7.77782	3.62536	4.07372				7.37042	2.35043	4.45897				8.37042	2.45014	5.45897					3.55564	4.80057	6.22949				3.37042	4.01282	6.89343
								8.76891	1.4492	7.23959				7.35855	2.8984	3.35939				7.76891	3.623	4.09899				7.35855	2.34761	4.47919				8.35855	2.4492	5.47919					3.53782	4.79681	6.23959				3.35855	4.0107	6.89975
								8.76012	1.44827	7.24989				7.34683	2.89655	3.37483				7.76012	3.62069	4.12472				7.34683	2.34482	4.49978				8.34683	2.44827	5.49978					3.52024	4.7931	6.24989				3.34683	4.00862	6.90618
								8.75146	1.44736	7.26037				7.33527	2.89472	3.39055				7.75146	3.6184	4.15092				7.33527	2.34208	4.52074				8.33527	2.44736	5.52074					3.50291	4.78944	6.26037				3.33527	4.00656	6.91273
								8.74291	1.44646	7.27103				7.32388	2.89291	3.40655				7.74291	3.61614	4.17758				7.32388	2.33937	4.54206				8.32388	2.44646	5.54206					3.48582	4.78583	6.27103				3.32388	4.00453	6.91939
								8.73449	1.44557	7.28187				7.31266	2.89114	3.42281				7.73449	3.61392	4.20468				7.31266	2.3367	4.56375				8.31266	2.44557	5.56375					3.46898	4.78227	6.28187				3.31266	4.00253	6.92617
								8.7262	1.44469	7.29289				7.3016	2.88938	3.43934				7.7262	3.61173	4.23223				7.3016	2.33408	4.58579				8.3016	2.44469	5.58579					3.4524	4.77877	6.29289				3.3016	4.00056	6.93306
								8.71804	1.44383	7.30409				7.29072	2.88766	3.45613				7.71804	3.60958	4.26022				7.29072	2.33149	4.60817				8.29072	2.44383	5.60817					3.43607	4.77532	6.30409				3.29072	3.99862	6.94005
								8.71	1.44298	7.31545				7.28001	2.88596	3.47318				7.71	3.60746	4.28863				7.28001	2.32895	4.63091				8.28001	2.44298	5.63091					3.42001	4.77193	6.31545				3.28001	3.99671	6.94716
								8.70211	1.44215	7.32699				7.26947	2.8843	3.49048				7.70211	3.60537	4.31747				7.26947	2.32644	4.65397				8.26947	2.44215	5.65397					3.40421	4.76859	6.32699				3.26947	3.99483	6.95437
								8.69434	1.44133	7.33869				7.25912	2.88266	3.50803				7.69434	3.60332	4.34672				7.25912	2.32399	4.67738				8.25912	2.44133	5.67738					3.38869	4.76531	6.33869				3.25912	3.99299	6.96168
								8.68672	1.44052	7.35055				7.24896	2.88105	3.52583				7.68672	3.60131	4.37638				7.24896	2.32157	4.7011				8.24896	2.44052	5.7011					3.37343	4.76209	6.35055				3.24896	3.99118	6.96909
								8.67923	1.43973	7.36258				7.23897	2.87947	3.54386				7.67923	3.59933	4.40644				7.23897	2.3192	4.72515				8.23897	2.43973	5.72515					3.35846	4.75893	6.36258				3.23897	3.9894	6.97661
								8.67188	1.43896	7.37476				7.22918	2.87791	3.56214				7.67188	3.59739	4.43689				7.22918	2.31687	4.74951				8.22918	2.43896	5.74951					3.34377	4.75583	6.37476				3.22918	3.98765	6.98422
								8.66468	1.4382	7.38709				7.21957	2.87639	3.58064				7.66468	3.59549	4.46773				7.21957	2.31459	4.77419				8.21957	2.4382	5.77419					3.32936	4.75279	6.38709				3.21957	3.98594	6.99193
								8.65762	1.43745	7.39958				7.21016	2.8749	3.59937				7.65762	3.59363	4.49895				7.21016	2.31235	4.79916				8.21016	2.43745	5.79916					3.31524	4.7498	6.39958				3.21016	3.98426	6.99974
								8.65071	1.43672	7.41221				7.20094	2.87344	3.61832				7.65071	3.5918	4.53054				7.20094	2.31016	4.82443				8.20094	2.43672	5.82443					3.30142	4.74688	6.41221				3.20094	3.98262	7.00763
								8.64394	1.43601	7.42499				7.19192	2.87201	3.63749				7.64394	3.59002	4.56249				7.19192	2.30802	4.84999				8.19192	2.43601	5.84999					3.28788	4.74403	6.42499				3.19192	3.98101	7.01562
								8.63733	1.43531	7.43792				7.1831	2.87062	3.65687				7.63733	3.58827	4.59479				7.1831	2.30592	4.87583				8.1831	2.43531	5.87583					3.27465	4.74123	6.43792				3.1831	3.97944	7.0237
								8.63086	1.43463	7.45098				7.17448	2.86925	3.67647				7.63086	3.58656	4.62744				7.17448	2.30388	4.90195				8.17448	2.43463	5.90195					3.26172	4.7385	6.45098				3.17448	3.97791	7.03186
								8.62455	1.43396	7.46417				7.16607	2.86792	3.69626				7.62455	3.5849	4.66043				7.16607	2.30188	4.92835				8.16607	2.43396	5.92835					3.2491	4.73584	6.46417				3.16607	3.97641	7.04011
								8.61839	1.43331	7.4775				7.15786	2.86662	3.71625				7.61839	3.58327	4.69375				7.15786	2.29993	4.955				8.15786	2.43331	5.955					3.23679	4.73324	6.4775				3.15786	3.97494	7.04844
								8.61239	1.43268	7.49096				7.14986	2.86535	3.73644				7.61239	3.58169	4.7274				7.14986	2.29803	4.98192				8.14986	2.43268	5.98192					3.22478	4.7307	6.49096				3.14986	3.97352	7.05685
								8.60655	1.43206	7.50454				7.14206	2.86412	3.75681				7.60655	3.58015	4.76135				7.14206	2.29617	5.00908				8.14206	2.43206	6.00908					3.21309	4.72823	6.50454				3.14206	3.97213	7.06534
								8.60086	1.43146	7.51825				7.13448	2.86292	3.77737				7.60086	3.57864	4.79562				7.13448	2.29437	5.03649				8.13448	2.43146	6.03649					3.20172	4.72583	6.51825				3.13448	3.97078	7.0739
								8.59534	1.43087	7.53207				7.12711	2.86175	3.79811				7.59534	3.57719	4.83018				7.12711	2.29262	5.06414				8.12711	2.43087	6.06414					3.19067	4.7235	6.53207				3.12711	3.96947	7.08254
								8.58997	1.43031	7.54601				7.11996	2.86062	3.81901				7.58997	3.57577	4.86502				7.11996	2.29092	5.09202				8.11996	2.43031	6.09202					3.17994	4.72123	6.54601				3.11996	3.96819	7.09126
								8.58477	1.42976	7.56006				7.11303	2.85952	3.84009				7.58477	3.5744	4.90015				7.11303	2.28928	5.12012				8.11303	2.42976	6.12012					3.16954	4.71904	6.56006				3.11303	3.96696	7.10004
								8.57973	1.42923	7.57422				7.10631	2.85845	3.86133				7.57973	3.57307	4.93555				7.10631	2.28768	5.14844				8.10631	2.42923	6.14844					3.15947	4.71691	6.57422				3.10631	3.96576	7.10889
								8.57486	1.42871	7.58849				7.09982	2.85743	3.88273				7.57486	3.57178	4.97121				7.09982	2.28614	5.17697				8.09982	2.42871	6.17697					3.14973	4.71485	6.58849				3.09982	3.9646	7.1178
								8.57016	1.42822	7.60285				7.09354	2.85643	3.90428				7.57016	3.57054	5.00713				7.09354	2.28465	5.2057				8.09354	2.42822	6.2057					3.14032	4.71286	6.60285				3.09354	3.96349	7.12678
								8.56562	1.42774	7.61732				7.08749	2.85547	3.92597				7.56562	3.56934	5.04329				7.08749	2.28321	5.23463				8.08749	2.42774	6.23463					3.13124	4.71095	6.61732				3.08749	3.96241	7.13582
								8.56125	1.42728	7.63188				7.08167	2.85455	3.94781				7.56125	3.56819	5.07969				7.08167	2.28183	5.26375				8.08167	2.42728	6.26375					3.12251	4.7091	6.63188				3.08167	3.96137	7.14492
								8.55705	1.42683	7.64653				7.07607	2.85366	3.96979				7.55705	3.56708	5.11631				7.07607	2.2805	5.29305				8.07607	2.42683	6.29305					3.11411	4.70733	6.64653				3.07607	3.96037	7.15408
								8.55303	1.42641	7.66126				7.0707	2.85281	3.99189				7.55303	3.56602	5.15316				7.0707	2.27922	5.32252				8.0707	2.42641	6.32252					3.10605	4.70563	6.66126				3.0707	3.95942	7.16329
								8.54917	1.426	7.67608				7.06556	2.852	4.01412				7.54917	3.565	5.19021				7.06556	2.278	5.35217				8.06556	2.426	6.35217					3.09834	4.704	6.67608				3.06556	3.9585	7.17255
								8.54549	1.42561	7.69098				7.06065	2.85122	4.03647				7.54549	3.56403	5.22746				7.06065	2.27683	5.38197				8.06065	2.42561	6.38197					3.09098	4.70244	6.69098				3.06065	3.95762	7.18186
								8.54198	1.42524	7.70596				7.05597	2.85048	4.05894				7.54198	3.5631	5.2649				7.05597	2.27572	5.41192				8.05597	2.42524	6.41192					3.08396	4.70096	6.70596				3.05597	3.95679	7.19122
								8.53865	1.42489	7.72101				7.05153	2.84978	4.08151				7.53865	3.56222	5.30252				7.05153	2.27467	5.44202				8.05153	2.42489	6.44202					3.07729	4.69955	6.72101				3.05153	3.956	7.20063
								8.53549	1.42455	7.73613				7.04732	2.84911	4.10419				7.53549	3.56139	5.34032				7.04732	2.27366	5.47225				8.04732	2.42455	6.47225					3.07098	4.69822	6.73613				3.04732	3.95525	7.21008
								8.53251	1.42424	7.75131				7.04334	2.84848	4.12697				7.53251	3.5606	5.37828				7.04334	2.27272	5.50262				8.04334	2.42424	6.50262					3.06501	4.69696	6.75131				3.04334	3.95454	7.21957
								8.5297	1.42394	7.76655				7.0396	2.84789	4.14983				7.5297	3.55986	5.41639				7.0396	2.27183	5.53311				8.0396	2.42394	6.53311					3.0594	4.69578	6.76655				3.0396	3.95387	7.2291
								8.52707	1.42367	7.78186				7.0361	2.84733	4.17279				7.52707	3.55917	5.45464				7.0361	2.271	5.56371				8.0361	2.42367	6.56371					3.05415	4.69467	6.78186				3.0361	3.95325	7.23866
								8.52462	1.42341	7.79721				7.03283	2.84682	4.19582				7.52462	3.55852	5.49303				7.03283	2.27022	5.59443				8.03283	2.42341	6.59443					3.04925	4.69363	6.79721				3.03283	3.95267	7.24826
								8.52235	1.42317	7.81262				7.02981	2.84634	4.21893				7.52235	3.55792	5.53155				7.02981	2.2695	5.62524				8.02981	2.42317	6.62524					3.04471	4.69267	6.81262				3.02981	3.95213	7.25789
								8.52026	1.42295	7.82807				7.02702	2.84589	4.24211				7.52026	3.55737	5.57018				7.02702	2.26884	5.65614				8.02702	2.42295	6.65614					3.04053	4.69179	6.82807				3.02702	3.95163	7.26754
								8.51835	1.42275	7.84357				7.02447	2.84549	4.26535				7.51835	3.55686	5.60891				7.02447	2.26824	5.68713				8.02447	2.42275	6.68713					3.03671	4.69098	6.84357				3.02447	3.95118	7.27723
								8.51662	1.42256	7.8591				7.02217	2.84513	4.28865				7.51662	3.55641	5.64775				7.02217	2.26769	5.7182				8.02217	2.42256	6.7182					3.03325	4.69025	6.8591				3.02217	3.95077	7.28694
								8.51507	1.4224	7.87467				7.0201	2.8448	4.312				7.51507	3.556	5.68667				7.0201	2.2672	5.74933				8.0201	2.4224	6.74933					3.03015	4.6896	6.87467				3.0201	3.9504	7.29667
								8.51371	1.42226	7.89027				7.01828	2.84451	4.3354				7.51371	3.55564	5.72566				7.01828	2.26677	5.78053				8.01828	2.42226	6.78053					3.02741	4.68902	6.89027				3.01828	3.95007	7.30642
								8.51252	1.42213	7.90589				7.0167	2.84426	4.35884				7.51252	3.55532	5.76473				7.0167	2.26639	5.81178				8.0167	2.42213	6.81178					3.02504	4.68852	6.90589				3.0167	3.94979	7.31618
								8.51152	1.42202	7.92154				7.01536	2.84405	4.38231				7.51152	3.55506	5.80385				7.01536	2.26607	5.84308				8.01536	2.42202	6.84308					3.02303	4.6881	6.92154				3.01536	3.94955	7.32596
								8.5107	1.42194	7.93721				7.01426	2.84387	4.40581				7.5107	3.55484	5.84302				7.01426	2.26581	5.87442				8.01426	2.42194	6.87442					3.02139	4.68775	6.93721				3.01426	3.94936	7.33576
								8.51006	1.42187	7.95289				7.01341	2.84374	4.42934				7.51006	3.55467	5.88223				7.01341	2.26561	5.90579				8.01341	2.42187	6.90579					3.02011	4.68748	6.95289				3.01341	3.94921	7.34556
								8.5096	1.42182	7.96859				7.0128	2.84364	4.45288				7.5096	3.55455	5.92147				7.0128	2.26546	5.93718				8.0128	2.42182	6.93718					3.0192	4.68729	6.96859				3.0128	3.9491	7.35537
								8.50933	1.42179	7.98429				7.01243	2.84358	4.47644				7.50933	3.55448	5.96073				7.01243	2.26538	5.96859				8.01243	2.42179	6.96859					3.01865	4.68717	6.98429				3.01243	3.94903	7.36518
								8.50923	1.42178	8				7.01231	2.84357	4.5				7.50923	3.55446	6				7.01231	2.26535	6				8.01231	2.42178	7					3.01847	4.68713	7				3.01231	3.94901	7.375
								8.50933	1.42179	8.01571				7.01243	2.84358	4.52356				7.50933	3.55448	6.03927				7.01243	2.26538	6.03141				8.01243	2.42179	7.03141					3.01865	4.68717	7.01571				3.01243	3.94903	7.38482
								8.5096	1.42182	8.03141				7.0128	2.84364	4.54712				7.5096	3.55455	6.07853				7.0128	2.26546	6.06282				8.0128	2.42182	7.06282					3.0192	4.68729	7.03141				3.0128	3.9491	7.39463
								8.51006	1.42187	8.04711				7.01341	2.84374	4.57066				7.51006	3.55467	6.11777				7.01341	2.26561	6.09421				8.01341	2.42187	7.09421					3.02011	4.68748	7.04711				3.01341	3.94921	7.40444
								8.5107	1.42194	8.06279				7.01426	2.84387	4.59419				7.5107	3.55484	6.15698				7.01426	2.26581	6.12558				8.01426	2.42194	7.12558					3.02139	4.68775	7.06279				3.01426	3.94936	7.41424
								8.51152	1.42202	8.07846				7.01536	2.84405	4.61769				7.51152	3.55506	6.19615				7.01536	2.26607	6.15692				8.01536	2.42202	7.15692					3.02303	4.6881	7.07846				3.01536	3.94955	7.42404
								8.51252	1.42213	8.09411				7.0167	2.84426	4.64116				7.51252	3.55532	6.23527				7.0167	2.26639	6.18822				8.0167	2.42213	7.18822					3.02504	4.68852	7.09411				3.0167	3.94979	7.43382
								8.51371	1.42226	8.10973				7.01828	2.84451	4.6646				7.51371	3.55564	6.27434				7.01828	2.26677	6.21947				8.01828	2.42226	7.21947					3.02741	4.68902	7.10973				3.01828	3.95007	7.44358
								8.51507	1.4224	8.12533				7.0201	2.8448	4.688				7.51507	3.556	6.31333				7.0201	2.2672	6.25067				8.0201	2.4224	7.25067					3.03015	4.6896	7.12533				3.0201	3.9504	7.45333
								8.51662	1.42256	8.1409				7.02217	2.84513	4.71135				7.51662	3.55641	6.35225				7.02217	2.26769	6.2818				8.02217	2.42256	7.2818					3.03325	4.69025	7.1409				3.02217	3.95077	7.46306
								8.51835	1.42275	8.15643				7.02447	2.84549	4.73465				7.51835	3.55686	6.39109				7.02447	2.26824	6.31287				8.02447	2.42275	7.31287					3.03671	4.69098	7.15643				3.02447	3.95118	7.47277
								8.52026	1.42295	8.17193				7.02702	2.84589	4.75789				7.52026	3.55737	6.42982				7.02702	2.26884	6.34386				8.02702	2.42295	7.34386					3.04053	4.69179	7.17193				3.02702	3.95163	7.48246
								8.52235	1.42317	8.18738				7.02981	2.84634	4.78107				7.52235	3.55792	6.46845				7.02981	2.2695	6.37476				8.02981	2.42317	7.37476					3.04471	4.69267	7.18738				3.02981	3.95213	7.49211
								8.52462	1.42341	8.20279				7.03283	2.84682	4.80418				7.52462	3.55852	6.50697				7.03283	2.27022	6.40557				8.03283	2.42341	7.40557					3.04925	4.69363	7.20279				3.03283	3.95267	7.50174
								8.52707	1.42367	8.21814				7.0361	2.84733	4.82721				7.52707	3.55917	6.54536				7.0361	2.271	6.43629				8.0361	2.42367	7.43629					3.05415	4.69467	7.21814				3.0361	3.95325	7.51134
								8.5297	1.42394	8.23345				7.0396	2.84789	4.85017				7.5297	3.55986	6.58361				7.0396	2.27183	6.46689				8.0396	2.42394	7.46689					3.0594	4.69578	7.23345				3.0396	3.95387	7.5209
								8.53251	1.42424	8.24869				7.04334	2.84848	4.87303				7.53251	3.5606	6.62172				7.04334	2.27272	6.49738				8.04334	2.42424	7.49738					3.06501	4.69696	7.24869				3.04334	3.95454	7.53043
								8.53549	1.42455	8.26387				7.04732	2.84911	4.89581				7.53549	3.56139	6.65968				7.04732	2.27366	6.52775				8.04732	2.42455	7.52775					3.07098	4.69822	7.26387				3.04732	3.95525	7.53992
								8.53865	1.42489	8.27899				7.05153	2.84978	4.91849				7.53865	3.56222	6.69748				7.05153	2.27467	6.55798				8.05153	2.42489	7.55798					3.07729	4.69955	7.27899				3.05153	3.956	7.54937
								8.54198	1.42524	8.29404				7.05597	2.85048	4.94106				7.54198	3.5631	6.7351				7.05597	2.27572	6.58808				8.05597	2.42524	7.58808					3.08396	4.70096	7.29404				3.05597	3.95679	7.55878
								8.54549	1.42561	8.30902				7.06065	2.85122	4.96353				7.54549	3.56403	6.77254				7.06065	2.27683	6.61803				8.06065	2.42561	7.61803					3.09098	4.70244	7.30902				3.06065	3.95762	7.56814
								8.54917	1.426	8.32392				7.06556	2.852	4.98588				7.54917	3.565	6.80979				7.06556	2.278	6.64783				8.06556	2.426	7.64783					3.09834	4.704	7.32392				3.06556	3.9585	7.57745
								8.55303	1.42641	8.33874				7.0707	2.85281	5.00811				7.55303	3.56602	6.84684				7.0707	2.27922	6.67748				8.0707	2.42641	7.67748					3.10605	4.70563	7.33874				3.0707	3.95942	7.58671
								8.55705	1.42683	8.35347				7.07607	2.85366	5.03021				7.55705	3.56708	6.88369				7.07607	2.2805	6.70695				8.07607	2.42683	7.70695					3.11411	4.70733	7.35347				3.07607	3.96037	7.59592
								8.56125	1.42728	8.36812				7.08167	2.85455	5.05219				7.56125	3.56819	6.92031				7.08167	2.28183	6.73625				8.08167	2.42728	7.73625					3.12251	4.7091	7.36812				3.08167	3.96137	7.60508
								8.56562	1.42774	8.38268				7.08749	2.85547	5.07403				7.56562	3.56934	6.95671				7.08749	2.28321	6.76537				8.08749	2.42774	7.76537					3.13124	4.71095	7.38268				3.08749	3.96241	7.61418
								8.57016	1.42822	8.39715				7.09354	2.85643	5.09572				7.57016	3.57054	6.99287				7.09354	2.28465	6.7943				8.09354	2.42822	7.7943					3.14032	4.71286	7.39715				3.09354	3.96349	7.62322
								8.57486	1.42871	8.41151				7.09982	2.85743	5.11727				7.57486	3.57178	7.02879				7.09982	2.28614	6.82303				8.09982	2.42871	7.82303					3.14973	4.71485	7.41151				3.09982	3.9646	7.6322
								8.57973	1.42923	8.42578				7.10631	2.85845	5.13867				7.57973	3.57307	7.06445				7.10631	2.28768	6.85156				8.10631	2.42923	7.85156					3.15947	4.71691	7.42578				3.10631	3.96576	7.64111
								8.58477	1.42976	8.43994				7.11303	2.85952	5.15991				7.58477	3.5744	7.09985				7.11303	2.28928	6.87988				8.11303	2.42976	7.87988					3.16954	4.71904	7.43994				3.11303	3.96696	7.64996
								8.58997	1.43031	8.45399				7.11996	2.86062	5.18099				7.58997	3.57577	7.13498				7.11996	2.29092	6.90798				8.11996	2.43031	7.90798					3.17994	4.72123	7.45399				3.11996	3.96819	7.65874
								8.59534	1.43087	8.46793				7.12711	2.86175	5.20189				7.59534	3.57719	7.16982				7.12711	2.29262	6.93586				8.12711	2.43087	7.93586					3.19067	4.7235	7.46793				3.12711	3.96947	7.66746
								8.60086	1.43146	8.48175				7.13448	2.86292	5.22263				7.60086	3.57864	7.20438				7.13448	2.29437	6.96351				8.13448	2.43146	7.96351					3.20172	4.72583	7.48175				3.13448	3.97078	7.6761
								8.60655	1.43206	8.49546				7.14206	2.86412	5.24319				7.60655	3.58015	7.23865				7.14206	2.29617	6.99092				8.14206	2.43206	7.99092					3.21309	4.72823	7.49546				3.14206	3.97213	7.68466
								8.61239	1.43268	8.50904				7.14986	2.86535	5.26356				7.61239	3.58169	7.2726				7.14986	2.29803	7.01808				8.14986	2.43268	8.01808					3.22478	4.7307	7.50904				3.14986	3.97352	7.69315
								8.61839	1.43331	8.5225				7.15786	2.86662	5.28375				7.61839	3.58327	7.30625				7.15786	2.29993	7.045				8.15786	2.43331	8.045					3.23679	4.73324	7.5225				3.15786	3.97494	7.70156
								8.62455	1.43396	8.53583				7.16607	2.86792	5.30374				7.62455	3.5849	7.33957				7.16607	2.30188	7.07165				8.16607	2.43396	8.07165					3.2491	4.73584	7.53583				3.16607	3.97641	7.70989
								8.63086	1.43463	8.54902				7.17448	2.86925	5.32353				7.63086	3.58656	7.37256				7.17448	2.30388	7.09805				8.17448	2.43463	8.09805					3.26172	4.7385	7.54902				3.17448	3.97791	7.71814
								8.63733	1.43531	8.56208				7.1831	2.87062	5.34313				7.63733	3.58827	7.40521				7.1831	2.30592	7.12417				8.1831	2.43531	8.12417					3.27465	4.74123	7.56208				3.1831	3.97944	7.7263
								8.64394	1.43601	8.57501				7.19192	2.87201	5.36251				7.64394	3.59002	7.43751				7.19192	2.30802	7.15001				8.19192	2.43601	8.15001					3.28788	4.74403	7.57501				3.19192	3.98101	7.73438
								8.65071	1.43672	8.58779				7.20094	2.87344	5.38168				7.65071	3.5918	7.46946				7.20094	2.31016	7.17557				8.20094	2.43672	8.17557					3.30142	4.74688	7.58779				3.20094	3.98262	7.74237
								8.65762	1.43745	8.60042				7.21016	2.8749	5.40063				7.65762	3.59363	7.50105				7.21016	2.31235	7.20084				8.21016	2.43745	8.20084					3.31524	4.7498	7.60042				3.21016	3.98426	7.75026
								8.66468	1.4382	8.61291				7.21957	2.87639	5.41936				7.66468	3.59549	7.53227				7.21957	2.31459	7.22581				8.21957	2.4382	8.22581					3.32936	4.75279	7.61291				3.21957	3.98594	7.75807
								8.67188	1.43896	8.62524				7.22918	2.87791	5.43786				7.67188	3.59739	7.56311				7.22918	2.31687	7.25049				8.22918	2.43896	8.25049					3.34377	4.75583	7.62524				3.22918	3.98765	7.76578
								8.67923	1.43973	8.63742				7.23897	2.87947	5.45614				7.67923	3.59933	7.59356				7.23897	2.3192	7.27485				8.23897	2.43973	8.27485					3.35846	4.75893	7.63742				3.23897	3.9894	7.77339
								8.68672	1.44052	8.64945				7.24896	2.88105	5.47417				7.68672	3.60131	7.62362				7.24896	2.32157	7.2989				8.24896	2.44052	8.2989					3.37343	4.76209	7.64945				3.24896	3.99118	7.78091
								8.69434	1.44133	8.66131				7.25912	2.88266	5.49197				7.69434	3.60332	7.65328				7.25912	2.32399	7.32262				8.25912	2.44133	8.32262					3.38869	4.76531	7.66131				3.25912	3.99299	7.78832
								8.70211	1.44215	8.67301				7.26947	2.8843	5.50952				7.70211	3.60537	7.68253				7.26947	2.32644	7.34603				8.26947	2.44215	8.34603					3.40421	4.76859	7.67301				3.26947	3.99483	7.79563
								8.71	1.44298	8.68455				7.28001	2.88596	5.52682				7.71	3.60746	7.71137				7.28001	2.32895	7.36909				8.28001	2.44298	8.36909					3.42001	4.77193	7.68455				3.28001	3.99671	7.80284
								8.71804	1.44383	8.69591				7.29072	2.88766	5.54387				7.71804	3.60958	7.73978				7.29072	2.33149	7.39183				8.29072	2.44383	8.39183					3.43607	4.77532	7.69591				3.29072	3.99862	7.80995
								8.7262	1.44469	8.70711				7.3016	2.88938	5.56066				7.7262	3.61173	7.76777				7.3016	2.33408	7.41421				8.3016	2.44469	8.41421					3.4524	4.77877	7.70711				3.3016	4.00056	7.81694
								8.73449	1.44557	8.71813				7.31266	2.89114	5.57719				7.73449	3.61392	7.79532				7.31266	2.3367	7.43625				8.31266	2.44557	8.43625					3.46898	4.78227	7.71813				3.31266	4.00253	7.82383
								8.74291	1.44646	8.72897				7.32388	2.89291	5.59345				7.74291	3.61614	7.82242				7.32388	2.33937	7.45794				8.32388	2.44646	8.45794					3.48582	4.78583	7.72897				3.32388	4.00453	7.83061
								8.75146	1.44736	8.73963				7.33527	2.89472	5.60945				7.75146	3.6184	7.84908				7.33527	2.34208	7.47926				8.33527	2.44736	8.47926					3.50291	4.78944	7.73963				3.33527	4.00656	7.83727
								8.76012	1.44827	8.75011				7.34683	2.89655	5.62517				7.76012	3.62069	7.87528				7.34683	2.34482	7.50022				8.34683	2.44827	8.50022					3.52024	4.7931	7.75011				3.34683	4.00862	7.84382
								8.76891	1.4492	8.76041				7.35855	2.8984	5.64061				7.76891	3.623	7.90101				7.35855	2.34761	7.52081				8.35855	2.4492	8.52081					3.53782	4.79681	7.76041				3.35855	4.0107	7.85025
								8.77782	1.45014	8.77051				7.37042	2.90028	5.65577				7.77782	3.62536	7.92628				7.37042	2.35043	7.54103				8.37042	2.45014	8.54103					3.55564	4.80057	7.77051				3.37042	4.01282	7.85657
								8.78684	1.4511	8.78043				7.38246	2.90219	5.67065				7.78684	3.62774	7.95108				7.38246	2.35329	7.56086				8.38246	2.4511	8.56086					3.57368	4.80438	7.78043				3.38246	4.01496	7.86277
								8.79598	1.45206	8.79016				7.39464	2.90412	5.68523				7.79598	3.63015	7.97539				7.39464	2.35618	7.58031				8.39464	2.45206	8.58031					3.59196	4.80824	7.79016				3.39464	4.01714	7.86885
								8.80523	1.45304	8.79968				7.40697	2.90607	5.69953				7.80523	3.63259	7.99921				7.40697	2.35911	7.59937				8.40697	2.45304	8.59937					3.61046	4.81215	7.79968				3.40697	4.01933	7.8748
								8.81459	1.45403	8.80902				7.41945	2.90805	5.71353				7.81459	3.63506	8.02254				7.41945	2.36208	7.61803				8.41945	2.45403	8.61803					3.62918	4.8161	7.80902				3.41945	4.02156	7.88064
								8.82406	1.45502	8.81815				7.43207	2.91005	5.72722				7.82406	3.63756	8.04537				7.43207	2.36507	7.6363				8.43207	2.45502	8.6363					3.64811	4.8201	7.81815				3.43207	4.02381	7.88634
								8.83363	1.45604	8.82708				7.44484	2.91207	5.74062				7.83363	3.64009	8.0677				7.44484	2.36811	7.65416				8.44484	2.45604	8.65416					3.66726	4.82414	7.82708				3.44484	4.02608	7.89193
								8.8433	1.45706	8.83581				7.45774	2.91411	5.75371				7.8433	3.64264	8.08952				7.45774	2.37117	7.67161				8.45774	2.45706	8.67161					3.6866	4.82823	7.83581				3.45774	4.02838	7.89738
								8.85308	1.45809	8.84433				7.47077	2.91618	5.76649				7.85308	3.64522	8.11082				7.47077	2.37427	7.68866				8.47077	2.45809	8.68866					3.70616	4.83236	7.84433				3.47077	4.0307	7.9027
								8.86295	1.45913	8.85264				7.48393	2.91826	5.77896				7.86295	3.64783	8.1316				7.48393	2.37739	7.70528				8.48393	2.45913	8.70528					3.7259	4.83653	7.85264				3.48393	4.03305	7.9079
								8.87292	1.46018	8.86074				7.49723	2.92037	5.79111				7.87292	3.65046	8.15186				7.49723	2.38055	7.72148				8.49723	2.46018	8.72148					3.74584	4.84074	7.86074				3.49723	4.03541	7.91296
								8.88298	1.46125	8.86863				7.51064	2.92249	5.80295				7.88298	3.65312	8.17158				7.51064	2.38374	7.73726				8.51064	2.46125	8.73726					3.76596	4.84499	7.86863				3.51064	4.0378	7.91789
								8.89313	1.46232	8.87631				7.52418	2.92464	5.81446				7.89313	3.6558	8.19077				7.52418	2.38696	7.75261				8.52418	2.46232	8.75261					3.78627	4.84927	7.87631				3.52418	4.04022	7.92269
								8.90337	1.4634	8.88377				7.53783	2.9268	5.82565				7.90337	3.6585	8.20941				7.53783	2.3902	7.76753				8.53783	2.4634	8.76753					3.80675	4.8536	7.88377				3.53783	4.04265	7.92735
								8.9137	1.46449	8.89101				7.5516	2.92898	5.83651				7.9137	3.66123	8.22752				7.5516	2.39347	7.78201				8.5516	2.46449	8.78201					3.8274	4.85796	7.89101				3.5516	4.0451	7.93188
								8.92411	1.46559	8.89803				7.56548	2.93118	5.84704				7.92411	3.66397	8.24507				7.56548	2.39677	7.79606				8.56548	2.46559	8.79606					3.84822	4.86236	7.89803				3.56548	4.04758	7.93627
								8.9346	1.4667	8.90483				7.57946	2.93339	5.85724				7.9346	3.66674	8.26207				7.57946	2.40009	7.80965				8.57946	2.4667	8.80965					3.86919	4.86679	7.90483				3.57946	4.05007	7.94052
								8.94516	1.46781	8.9114				7.59355	2.93562	5.8671				7.94516	3.66953	8.27851				7.59355	2.40344	7.82281				8.59355	2.46781	8.82281					3.89033	4.87125	7.9114				3.59355	4.05258	7.94463
								8.95581	1.46894	8.91775				7.60774	2.93787	5.87663				7.95581	3.67234	8.29439				7.60774	2.40681	7.83551				8.60774	2.46894	8.83551					3.91161	4.87574	7.91775				3.60774	4.05511	7.9486
								8.96652	1.47007	8.92388				7.62203	2.94014	5.88582				7.96652	3.67517	8.3097				7.62203	2.4102	7.84776				8.62203	2.47007	8.84776					3.93304	4.88027	7.92388				3.62203	4.05765	7.95242
								8.97731	1.47121	8.92978				7.63641	2.94241	5.89466				7.97731	3.67802	8.32444				7.63641	2.41362	7.85955				8.63641	2.47121	8.85955					3.95461	4.88483	7.92978				3.63641	4.06021	7.95611
								8.98816	1.47235	8.93544				7.65088	2.9447	5.90317				7.98816	3.68088	8.33861				7.65088	2.41706	7.87089				8.65088	2.47235	8.87089					3.97632	4.88941	7.93544				3.65088	4.06279	7.95965
								8.99907	1.4735	8.94088				7.66543	2.94701	5.91132				7.99907	3.68376	8.3522				7.66543	2.42051	7.88176				8.66543	2.4735	8.88176					3.99815	4.89402	7.94088				3.66543	4.06539	7.96305
								9.01005	1.47466	8.94609				7.68007	2.94933	5.91913				8.01005	3.68666	8.36521				7.68007	2.42399	7.89217				8.68007	2.47466	8.89217					4.02011	4.89866	7.94609				3.68007	4.06799	7.9663
								9.02109	1.47583	8.95106				7.69479	2.95166	5.92658				8.02109	3.68957	8.37764				7.69479	2.42749	7.90211				8.69479	2.47583	8.90211					4.04218	4.90332	7.95106				3.69479	4.07062	7.96941
								9.03218	1.477	8.95579				7.70958	2.954	5.93369				8.03218	3.6925	8.38948				7.70958	2.431	7.91159				8.70958	2.477	8.91159					4.06437	4.908	7.95579				3.70958	4.07325	7.97237
								9.04333	1.47818	8.96029				7.72444	2.95636	5.94044				8.04333	3.69545	8.40073				7.72444	2.43453	7.92059				8.72444	2.47818	8.92059					4.08667	4.91271	7.96029				3.72444	4.0759	7.97518
								9.05453	1.47936	8.96456				7.73938	2.95872	5.94684				8.05453	3.6984	8.41139				7.73938	2.43808	7.92911				8.73938	2.47936	8.92911					4.10906	4.91744	7.96456				3.73938	4.07856	7.97785
								9.06578	1.48055	8.96858				7.75437	2.9611	5.95287				8.06578	3.70137	8.42146				7.75437	2.44164	7.93717				8.75437	2.48055	8.93717					4.13156	4.92219	7.96858				3.75437	4.08123	7.98036
								9.07707	1.48174	8.97237				7.76943	2.96348	5.95855				8.07707	3.70435	8.43092				7.76943	2.44522	7.94474				8.76943	2.48174	8.94474					4.15414	4.92696	7.97237				3.76943	4.08392	7.98273
								9.08841	1.48294	8.97592				7.78454	2.96587	5.96388				8.08841	3.70734	8.43979				7.78454	2.44881	7.95183				8.78454	2.48294	8.95183					4.17681	4.93175	7.97592				3.78454	4.08661	7.98495
								9.09978	1.48414	8.97922				7.79971	2.96828	5.96883				8.09978	3.71035	8.44806				7.79971	2.45242	7.95845				8.79971	2.48414	8.95845					4.19956	4.93655	7.97922				3.79971	4.08931	7.98701
								9.11119	1.48534	8.98229				7.81493	2.97069	5.97343				8.11119	3.71336	8.45572				7.81493	2.45603	7.96457				8.81493	2.48534	8.96457					4.22239	4.94137	7.98229				3.81493	4.09202	7.98893
								9.12264	1.48655	8.98511				7.83019	2.9731	5.97766				8.12264	3.71638	8.46277				7.83019	2.45966	7.97022				8.83019	2.48655	8.97022					4.24528	4.94621	7.98511				3.83019	4.09474	7.99069
								9.13412	1.48776	8.98769				7.84549	2.97553	5.98153				8.13412	3.71941	8.46922				7.84549	2.46329	7.97538				8.84549	2.48776	8.97538					4.26824	4.95106	7.98769				3.84549	4.09747	7.99231
								9.14563	1.48898	8.99002				7.86083	2.97796	5.98504				8.14563	3.72245	8.47506				7.86083	2.46694	7.98005				8.86083	2.48898	8.98005					4.29125	4.95592	7.99002				3.86083	4.1002	7.99376
								9.15716	1.4902	8.99211				7.87621	2.98039	5.98817				8.15716	3.72549	8.48029				7.87621	2.47059	7.98423				8.87621	2.4902	8.98423					4.31431	4.96079	7.99211				3.87621	4.10294	7.99507
								9.16871	1.49142	8.99396				7.89162	2.98283	5.99094				8.16871	3.72854	8.4849				7.89162	2.47425	7.98792				8.89162	2.49142	8.98792					4.33743	4.96567	7.99396				3.89162	4.10569	7.99623
								9.18029	1.49264	8.99556				7.90705	2.98528	5.99334				8.18029	3.7316	8.4889				7.90705	2.47792	7.99112				8.90705	2.49264	8.99112					4.36058	4.97056	7.99556				3.90705	4.10844	7.99723
								9.19188	1.49386	8.99692				7.92251	2.98773	5.99538				8.19188	3.73466	8.49229				7.92251	2.48159	7.99383				8.92251	2.49386	8.99383					4.38376	4.97545	7.99692				3.92251	4.11119	7.99807
								9.20349	1.49509	8.99803				7.93798	2.99018	5.99704				8.20349	3.73772	8.49507				7.93798	2.48527	7.99605				8.93798	2.49509	8.99605					4.40697	4.98035	7.99803				3.93798	4.11395	7.99877
								9.21511	1.49632	8.99889				7.95347	2.99263	5.99833				8.21511	3.74079	8.49722				7.95347	2.48895	7.99778				8.95347	2.49632	8.99778					4.43021	4.98526	7.99889				3.95347	4.11671	7.99931
								9.22673	1.49754	8.99951				7.96898	2.99509	5.99926				8.22673	3.74386	8.49877				7.96898	2.49263	7.99901				8.96898	2.49754	8.99901					4.45346	4.99017	7.99951				3.96898	4.11947	7.99969
								9.23836	1.49877	8.99988				7.98449	2.99754	5.99981				8.23836	3.74693	8.49969				7.98449	2.49631	7.99975				8.98449	2.49877	8.99975					4.47673	4.99509	7.99988				3.98449	4.12224	7.99992
								9.25	1.5	9				8	3	6				8.25	3.75	8.5				8	2.5	8				9	2.5	9					4.5	5	8				4	4.125	8
								9.25	1.5	7				8	3	3				8.25	3.75	3.5				8	2.5	4				9	2.5	5					4.5	5	6				4	4.125	6.75
								9.23843	1.49853	7.00012				7.98457	2.99706	3.00019				8.23843	3.74632	3.50031				7.98457	2.49559	4.00025				8.98457	2.49853	5.00025					4.47686	4.99411	6.00012				3.98457	4.12169	6.75008
								9.22686	1.49706	7.00049				7.96915	2.99411	3.00074				8.22686	3.74264	3.50123				7.96915	2.49117	4.00099				8.96915	2.49706	5.00099					4.45372	4.98823	6.00049				3.96915	4.11838	6.75031
								9.2153	1.49559	7.00111				7.95373	2.99117	3.00167				8.2153	3.73897	3.50278				7.95373	2.48676	4.00222				8.95373	2.49559	5.00222					4.43059	4.98235	6.00111				3.95373	4.11507	6.75069
								9.20374	1.49412	7.00197				7.93832	2.98823	3.00296				8.20374	3.73529	3.50493				7.93832	2.48235	4.00395				8.93832	2.49412	5.00395					4.40748	4.97647	6.00197				3.93832	4.11176	6.75123
								9.1922	1.49265	7.00308				7.92293	2.9853	3.00462				8.1922	3.73162	3.50771				7.92293	2.47795	4.00617				8.92293	2.49265	5.00617					4.3844	4.9706	6.00308				3.92293	4.10846	6.75193
								9.18067	1.49118	7.00444				7.90756	2.98237	3.00666				8.18067	3.72796	3.5111				7.90756	2.47355	4.00888				8.90756	2.49118	5.00888					4.36134	4.96473	6.00444				3.90756	4.10516	6.75277
								9.16916	1.48972	7.00604				7.89221	2.97944	3.00906				8.16916	3.7243	3.5151				7.89221	2.46916	4.01208				8.89221	2.48972	5.01208					4.33831	4.95888	6.00604				3.89221	4.10187	6.75377
								9.15767	1.48826	7.00789				7.87689	2.97651	3.01183				8.15767	3.72064	3.51971				7.87689	2.46477	4.01577				8.87689	2.48826	5.01577					4.31533	4.95303	6.00789				3.87689	4.09858	6.75493
								9.1462	1.4868	7.00998				7.86159	2.9736	3.01496				8.1462	3.717	3.52494				7.86159	2.4604	4.01995				8.86159	2.4868	5.01995					4.29239	4.9472	6.00998				3.86159	4.0953	6.75624
								9.13475	1.48534	7.01231				7.84634	2.97069	3.01847				8.13475	3.71336	3.53078				7.84634	2.45603	4.02462				8.84634	2.48534	5.02462					4.2695	4.94137	6.01231				3.84634	4.09202	6.75769
								9.12334	1.48389	7.01489				7.83112	2.96778	3.02234				8.12334	3.70973	3.53723				7.83112	2.45168	4.02978				8.83112	2.48389	5.02978					4.24667	4.93557	6.01489				3.83112	4.08876	6.75931
								9.11195	1.48244	7.01771				7.81594	2.96489	3.02657				8.11195	3.70611	3.54428				7.81594	2.44733	4.03543				8.81594	2.48244	5.03543					4.22391	4.92978	6.01771				3.81594	4.0855	6.76107
								9.1006	1.481	7.02078				7.8008	2.962	3.03117				8.1006	3.7025	3.55194				7.8008	2.443	4.04155				8.8008	2.481	5.04155					4.20121	4.924	6.02078				3.8008	4.08225	6.76299
								9.08929	1.47956	7.02408				7.78572	2.95912	3.03612				8.08929	3.69891	3.56021				7.78572	2.43869	4.04817				8.78572	2.47956	5.04817					4.17858	4.91825	6.02408				3.78572	4.07901	6.76505
								9.07802	1.47813	7.02763				7.77069	2.95626	3.04145				8.07802	3.69532	3.56908				7.77069	2.43439	4.05526				8.77069	2.47813	5.05526					4.15603	4.91251	6.02763				3.77069	4.07579	6.76727
								9.06679	1.4767	7.03142				7.75572	2.9534	3.04713				8.06679	3.69175	3.57854				7.75572	2.4301	4.06283				8.75572	2.4767	5.06283					4.13357	4.9068	6.03142				3.75572	4.07258	6.76964
								9.0556	1.47528	7.03544				7.7408	2.95056	3.05316				8.0556	3.68819	3.58861				7.7408	2.42583	4.07089				8.7408	2.47528	5.07089					4.1112	4.90111	6.03544				3.7408	4.06937	6.77215
								9.04446	1.47386	7.03971				7.72595	2.94772	3.05956				8.04446	3.68465	3.59927				7.72595	2.42158	4.07941				8.72595	2.47386	5.07941					4.08893	4.89544	6.03971				3.72595	4.06619	6.77482
								9.03338	1.47245	7.04421				7.71117	2.9449	3.06631				8.03338	3.68113	3.61052				7.71117	2.41735	4.08841				8.71117	2.47245	5.08841					4.06675	4.8898	6.04421				3.71117	4.06302	6.77763
								9.02234	1.47105	7.04894				7.69646	2.9421	3.07342				8.02234	3.67762	3.62236				7.69646	2.41314	4.09789				8.69646	2.47105	5.09789					4.04468	4.88419	6.04894				3.69646	4.05986	6.78059
								9.01137	1.46965	7.05391				7.68182	2.9393	3.08087				8.01137	3.67413	3.63479				7.68182	2.40896	4.10783				8.68182	2.46965	5.10783					4.02273	4.87861	6.05391				3.68182	4.05672	6.7837
								9.00045	1.46826	7.05912				7.66726	2.93653	3.08868				8.00045	3.67066	3.6478				7.66726	2.40479	4.11824				8.66726	2.46826	5.11824					4.00089	4.87305	6.05912				3.66726	4.05359	6.78695
								8.98959	1.46688	7.06456				7.65279	2.93377	3.09683				7.98959	3.66721	3.66139				7.65279	2.40065	4.12911				8.65279	2.46688	5.12911					3.97918	4.86753	6.06456				3.65279	4.05049	6.79035
								8.9788	1.46551	7.07022				7.6384	2.93102	3.10534				7.9788	3.66378	3.67556				7.6384	2.39653	4.14045				8.6384	2.46551	5.14045					3.95759	4.86204	6.07022				3.6384	4.0474	6.79389
								8.96807	1.46415	7.07612				7.62409	2.92829	3.11418				7.96807	3.66037	3.6903				7.62409	2.39244	4.15224				8.62409	2.46415	5.15224					3.93614	4.85658	6.07612				3.62409	4.04433	6.79758
								8.95742	1.46279	7.08225				7.60989	2.92558	3.12337				7.95742	3.65698	3.70561				7.60989	2.38837	4.16449				8.60989	2.46279	5.16449					3.91483	4.85116	6.08225				3.60989	4.04128	6.8014
								8.94683	1.46144	7.0886				7.59577	2.92289	3.1329				7.94683	3.65361	3.72149				7.59577	2.38433	4.17719				8.59577	2.46144	5.17719					3.89366	4.84578	6.0886				3.59577	4.03825	6.80537
								8.93632	1.46011	7.09517				7.58176	2.92022	3.14276				7.93632	3.65027	3.73793				7.58176	2.38033	4.19035				8.58176	2.46011	5.19035					3.87264	4.84043	6.09517				3.58176	4.03524	6.80948
								8.92589	1.45878	7.10197				7.56785	2.91756	3.15296				7.92589	3.64695	3.75493				7.56785	2.37635	4.20394				8.56785	2.45878	5.20394					3.85178	4.83513	6.10197				3.56785	4.03226	6.81373
								8.91554	1.45747	7.10899				7.55405	2.91493	3.16349				7.91554	3.64366	3.77248				7.55405	2.3724	4.21799				8.55405	2.45747	5.21799					3.83108	4.82986	6.10899				3.55405	4.0293	6.81812
								8.90527	1.45616	7.11623				7.54036	2.91232	3.17435				7.90527	3.6404	3.79059				7.54036	2.36848	4.23247				8.54036	2.45616	5.23247					3.81054	4.82464	6.11623				3.54036	4.02636	6.82265
								8.89508	1.45486	7.12369				7.52678	2.90973	3.18554				7.89508	3.63716	3.80923				7.52678	2.36459	4.24739				8.52678	2.45486	5.24739					3.79017	4.81946	6.12369				3.52678	4.02344	6.82731
								8.88499	1.45358	7.13137				7.51332	2.90716	3.19705				7.88499	3.63395	3.82842				7.51332	2.36074	4.26274				8.51332	2.45358	5.26274					3.76998	4.81432	6.13137				3.51332	4.02056	6.83211
								8.87498	1.45231	7.13926				7.49998	2.90462	3.20889				7.87498	3.63077	3.84814				7.49998	2.35692	4.27852				8.49998	2.45231	5.27852					3.74996	4.80923	6.13926				3.49998	4.01769	6.83704
								8.86507	1.45105	7.14736				7.48676	2.90209	3.22104				7.86507	3.62762	3.8684				7.48676	2.35314	4.29472				8.48676	2.45105	5.29472					3.73013	4.80419	6.14736				3.48676	4.01486	6.8421
								8.85525	1.4498	7.15567				7.47366	2.8996	3.23351				7.85525	3.6245	3.88918				7.47366	2.34939	4.31134				8.47366	2.4498	5.31134					3.7105	4.79919	6.15567				3.47366	4.01205	6.8473
								8.84553	1.44856	7.16419				7.4607	2.89712	3.24629				7.84553	3.6214	3.91048				7.4607	2.34569	4.32839				8.4607	2.44856	5.32839					3.69105	4.79425	6.16419				3.4607	4.00926	6.85262
								8.8359	1.44734	7.17292				7.44787	2.89468	3.25938				7.8359	3.61835	3.9323				7.44787	2.34201	4.34584				8.44787	2.44734	5.34584					3.67181	4.78935	6.17292				3.44787	4.00651	6.85807
								8.82638	1.44613	7.18185				7.43518	2.89225	3.27278				7.82638	3.61532	3.95463				7.43518	2.33838	4.3637				8.43518	2.44613	5.3637					3.65277	4.78451	6.18185				3.43518	4.00379	6.86366
								8.81697	1.44493	7.19098				7.42263	2.88986	3.28647				7.81697	3.61233	3.97746				7.42263	2.33479	4.38197				8.42263	2.44493	5.38197					3.63394	4.77972	6.19098				3.42263	4.00109	6.86936
								8.80766	1.44375	7.20032				7.41021	2.88749	3.30047				7.80766	3.60937	4.00079				7.41021	2.33124	4.40063				8.41021	2.44375	5.40063					3.61532	4.77498	6.20032				3.41021	3.99843	6.8752
								8.79846	1.44258	7.20984				7.39795	2.88515	3.31477				7.79846	3.60644	4.02461				7.39795	2.32773	4.41969				8.39795	2.44258	5.41969					3.59692	4.77031	6.20984				3.39795	3.9958	6.88115
								8.78937	1.44142	7.21957				7.38583	2.88284	3.32935				7.78937	3.60355	4.04892				7.38583	2.32426	4.43914				8.38583	2.44142	5.43914					3.57875	4.76568	6.21957				3.38583	3.9932	6.88723
								8.7804	1.44028	7.22949				7.37387	2.88056	3.34423				7.7804	3.6007	4.07372				7.37387	2.32084	4.45897				8.37387	2.44028	5.45897					3.5608	4.76112	6.22949				3.37387	3.99063	6.89343
								8.77154	1.43915	7.23959				7.36206	2.87831	3.35939				7.77154	3.59788	4.09899				7.36206	2.31746	4.47919				8.36206	2.43915	5.47919					3.54308	4.75661	6.23959				3.36206	3.98809	6.89975
								8.7628	1.43804	7.24989				7.3504	2.87608	3.37483				7.7628	3.5951	4.12472				7.3504	2.31412	4.49978				8.3504	2.43804	5.49978					3.5256	4.75217	6.24989				3.3504	3.98559	6.90618
								8.75418	1.43695	7.26037				7.33891	2.87389	3.39055				7.75418	3.59236	4.15092				7.33891	2.31084	4.52074				8.33891	2.43695	5.52074					3.50836	4.74778	6.26037				3.33891	3.98313	6.91273
								8.74568	1.43586	7.27103				7.32758	2.87173	3.40655				7.74568	3.58966	4.17758				7.32758	2.30759	4.54206				8.32758	2.43586	5.54206					3.49137	4.74346	6.27103				3.32758	3.98069	6.91939
								8.73731	1.4348	7.28187				7.31641	2.8696	3.42281				7.73731	3.587	4.20468				7.31641	2.3044	4.56375				8.31641	2.4348	5.56375					3.47462	4.7392	6.28187				3.31641	3.9783	6.92617
								8.72906	1.43375	7.29289				7.30542	2.8675	3.43934				7.72906	3.58438	4.23223				7.30542	2.30125	4.58579				8.30542	2.43375	5.58579					3.45813	4.735	6.29289				3.30542	3.97594	6.93306
								8.72095	1.43272	7.30409				7.29459	2.86544	3.45613				7.72095	3.5818	4.26022				7.29459	2.29815	4.60817				8.29459	2.43272	5.60817					3.44189	4.73087	6.30409				3.29459	3.97362	6.94005
								8.71296	1.4317	7.31545				7.28394	2.8634	3.47318				7.71296	3.57926	4.28863				7.28394	2.29511	4.63091				8.28394	2.4317	5.63091					3.42592	4.72681	6.31545				3.28394	3.97133	6.94716
								8.7051	1.4307	7.32699				7.27347	2.86141	3.49048				7.7051	3.57676	4.31747				7.27347	2.29211	4.65397				8.27347	2.4307	5.65397					3.4102	4.72281	6.32699				3.27347	3.96908	6.95437
								8.69738	1.42972	7.33869				7.26318	2.85944	3.50803				7.69738	3.5743	4.34672				7.26318	2.28916	4.67738				8.26318	2.42972	5.67738					3.39476	4.71889	6.33869				3.26318	3.96687	6.96168
								8.6898	1.42876	7.35055				7.25306	2.85751	3.52583				7.6898	3.57189	4.37638				7.25306	2.28627	4.7011				8.25306	2.42876	5.7011					3.37959	4.71503	6.35055				3.25306	3.9647	6.96909
								8.68235	1.42781	7.36258				7.24313	2.85562	3.54386				7.68235	3.56953	4.40644				7.24313	2.28343	4.72515				8.24313	2.42781	5.72515					3.3647	4.71124	6.36258				3.24313	3.96257	6.97661
								8.67504	1.42688	7.37476				7.23339	2.85376	3.56214				7.67504	3.5672	4.43689				7.23339	2.28064	4.74951				8.23339	2.42688	5.74951					3.35009	4.70752	6.37476				3.23339	3.96048	6.98422
								8.66788	1.42597	7.38709				7.22384	2.85194	3.58064				7.66788	3.56492	4.46773				7.22384	2.27791	4.77419				8.22384	2.42597	5.77419					3.33576	4.70388	6.38709				3.22384	3.95843	6.99193
								8.66086	1.42508	7.39958				7.21448	2.85015	3.59937				7.66086	3.56269	4.49895				7.21448	2.27523	4.79916				8.21448	2.42508	5.79916					3.32172	4.70031	6.39958				3.21448	3.95642	6.99974
								8.65398	1.4242	7.41221				7.20531	2.84841	3.61832				7.65398	3.56051	4.53054				7.20531	2.27261	4.82443				8.20531	2.4242	5.82443					3.30797	4.69681	6.41221				3.20531	3.95446	7.00763
								8.64726	1.42335	7.42499				7.19634	2.84669	3.63749				7.64726	3.55837	4.56249				7.19634	2.27004	4.84999				8.19634	2.42335	5.84999					3.29451	4.69339	6.42499				3.19634	3.95253	7.01562
								8.64068	1.42251	7.43792				7.18757	2.84502	3.65687				7.64068	3.55628	4.59479				7.18757	2.26753	4.87583				8.18757	2.42251	5.87583					3.28135	4.69004	6.43792				3.18757	3.95065	7.0237
								8.63425	1.42169	7.45098				7.179	2.84339	3.67647				7.63425	3.55423	4.62744				7.179	2.26508	4.90195				8.179	2.42169	5.90195					3.2685	4.68677	6.45098				3.179	3.94881	7.03186
								8.62797	1.42089	7.46417				7.17063	2.84179	3.69626				7.62797	3.55224	4.66043				7.17063	2.26268	4.92835				8.17063	2.42089	5.92835					3.25594	4.68358	6.46417				3.17063	3.94701	7.04011
								8.62185	1.42012	7.4775				7.16246	2.84023	3.71625				7.62185	3.55029	4.69375				7.16246	2.26035	4.955				8.16246	2.42012	5.955					3.24369	4.68046	6.4775				3.16246	3.94526	7.04844
								8.61588	1.41936	7.49096				7.1545	2.83871	3.73644				7.61588	3.54839	4.7274				7.1545	2.25807	4.98192				8.1545	2.41936	5.98192					3.23176	4.67743	6.49096				3.1545	3.94355	7.05685
								8.61007	1.41862	7.50454				7.14675	2.83723	3.75681				7.61007	3.54654	4.76135				7.14675	2.25585	5.00908				8.14675	2.41862	6.00908					3.22013	4.67447	6.50454				3.14675	3.94189	7.06534
								8.60441	1.4179	7.51825				7.13922	2.8358	3.77737				7.60441	3.54475	4.79562				7.13922	2.25369	5.03649				8.13922	2.4179	6.03649					3.20882	4.67159	6.51825				3.13922	3.94027	7.0739
								8.59892	1.4172	7.53207				7.13189	2.8344	3.79811				7.59892	3.543	4.83018				7.13189	2.2516	5.06414				8.13189	2.4172	6.06414					3.19783	4.6688	6.53207				3.13189	3.9387	7.08254
								8.59358	1.41652	7.54601				7.12478	2.83304	3.81901				7.59358	3.5413	4.86502				7.12478	2.24956	5.09202				8.12478	2.41652	6.09202					3.18716	4.66608	6.54601				3.12478	3.93717	7.09126
								8.58841	1.41586	7.56006				7.11788	2.83173	3.84009				7.58841	3.53966	4.90015				7.11788	2.24759	5.12012				8.11788	2.41586	6.12012					3.17682	4.66345	6.56006				3.11788	3.93569	7.10004
								8.5834	1.41523	7.57422				7.1112	2.83045	3.86133				7.5834	3.53807	4.93555				7.1112	2.24568	5.14844				8.1112	2.41523	6.14844					3.1668	4.6609	6.57422				3.1112	3.93426	7.10889
								8.57856	1.41461	7.58849				7.10474	2.82922	3.88273				7.57856	3.53653	4.97121				7.10474	2.24383	5.17697				8.10474	2.41461	6.17697					3.15711	4.65844	6.58849				3.10474	3.93287	7.1178
								8.57388	1.41401	7.60285				7.0985	2.82803	3.90428				7.57388	3.53504	5.00713				7.0985	2.24204	5.2057				8.0985	2.41401	6.2057					3.14775	4.65606	6.60285				3.0985	3.93153	7.12678
								8.56936	1.41344	7.61732				7.09248	2.82688	3.92597				7.56936	3.5336	5.04329				7.09248	2.24032	5.23463				8.09248	2.41344	6.23463					3.13873	4.65376	6.61732				3.09248	3.93024	7.13582
								8.56502	1.41289	7.63188				7.08669	2.82578	3.94781				7.56502	3.53222	5.07969				7.08669	2.23867	5.26375				8.08669	2.41289	6.26375					3.13004	4.65155	6.63188				3.08669	3.929	7.14492
								8.56084	1.41236	7.64653				7.08113	2.82472	3.96979				7.56084	3.53089	5.11631				7.08113	2.23707	5.29305				8.08113	2.41236	6.29305					3.12169	4.64943	6.64653				3.08113	3.9278	7.15408
								8.55684	1.41185	7.66126				7.07578	2.8237	3.99189				7.55684	3.52962	5.15316				7.07578	2.23554	5.32252				8.07578	2.41185	6.32252					3.11368	4.64739	6.66126				3.07578	3.92666	7.16329
								8.553	1.41136	7.67608				7.07067	2.82272	4.01412				7.553	3.5284	5.19021				7.07067	2.23408	5.35217				8.07067	2.41136	6.35217					3.10601	4.64544	6.67608				3.07067	3.92556	7.17255
								8.54934	1.41089	7.69098				7.06579	2.82179	4.03647				7.54934	3.52724	5.22746				7.06579	2.23268	5.38197				8.06579	2.41089	6.38197					3.09868	4.64358	6.69098				3.06579	3.92451	7.18186
								8.54585	1.41045	7.70596				7.06114	2.8209	4.05894				7.54585	3.52613	5.2649				7.06114	2.23135	5.41192				8.06114	2.41045	6.41192					3.09171	4.6418	6.70596				3.06114	3.92352	7.19122
								8.54254	1.41003	7.72101				7.05672	2.82006	4.08151				7.54254	3.52507	5.30252				7.05672	2.23009	5.44202				8.05672	2.41003	6.44202					3.08507	4.64012	6.72101				3.05672	3.92257	7.20063
								8.5394	1.40963	7.73613				7.05253	2.81926	4.10419				7.5394	3.52407	5.34032				7.05253	2.22889	5.47225				8.05253	2.40963	6.47225					3.07879	4.63852	6.73613				3.05253	3.92167	7.21008
								8.53643	1.40925	7.75131				7.04857	2.81851	4.12697				7.53643	3.52313	5.37828				7.04857	2.22776	5.50262				8.04857	2.40925	6.50262					3.07286	4.63701	6.75131				3.04857	3.92082	7.21957
								8.53364	1.4089	7.76655				7.04485	2.8178	4.14983				7.53364	3.52225	5.41639				7.04485	2.22669	5.53311				8.04485	2.4089	6.53311					3.06728	4.63559	6.76655				3.04485	3.92002	7.2291
								8.53103	1.40857	7.78186				7.04137	2.81713	4.17279				7.53103	3.52141	5.45464				7.04137	2.2257	5.56371				8.04137	2.40857	6.56371					3.06205	4.63426	6.78186				3.04137	3.91927	7.23866
								8.52859	1.40826	7.79721				7.03812	2.81651	4.19582				7.52859	3.52064	5.49303				7.03812	2.22477	5.59443				8.03812	2.40826	6.59443					3.05718	4.63302	6.79721				3.03812	3.91858	7.24826
								8.52633	1.40797	7.81262				7.03511	2.81594	4.21893				7.52633	3.51992	5.53155				7.03511	2.22391	5.62524				8.03511	2.40797	6.62524					3.05267	4.63188	6.81262				3.03511	3.91793	7.25789
								8.52425	1.4077	7.82807				7.03234	2.81541	4.24211				7.52425	3.51926	5.57018				7.03234	2.22311	5.65614				8.03234	2.4077	6.65614					3.04851	4.63082	6.82807				3.03234	3.91734	7.26754
								8.52235	1.40746	7.84357				7.02981	2.81493	4.26535				7.52235	3.51866	5.60891				7.02981	2.22239	5.68713				8.02981	2.40746	6.68713					3.04471	4.62985	6.84357				3.02981	3.91679	7.27723
								8.52063	1.40724	7.8591				7.02751	2.81449	4.28865				7.52063	3.51811	5.64775				7.02751	2.22173	5.7182				8.02751	2.40724	6.7182					3.04127	4.62898	6.8591				3.02751	3.9163	7.28694
								8.51909	1.40705	7.87467				7.02546	2.8141	4.312				7.51909	3.51762	5.68667				7.02546	2.22114	5.74933				8.02546	2.40705	6.74933					3.03819	4.62819	6.87467				3.02546	3.91586	7.29667
								8.51773	1.40688	7.89027				7.02364	2.81375	4.3354				7.51773	3.51719	5.72566				7.02364	2.22063	5.78053				8.02364	2.40688	6.78053					3.03547	4.6275	6.89027				3.02364	3.91547	7.30642
								8.51655	1.40673	7.90589				7.02207	2.81345	4.35884				7.51655	3.51681	5.76473				7.02207	2.22018	5.81178				8.02207	2.40673	6.81178					3.03311	4.6269	6.90589				3.02207	3.91513	7.31618
								8.51556	1.4066	7.92154				7.02074	2.8132	4.38231				7.51556	3.5165	5.80385				7.02074	2.21979	5.84308				8.02074	2.4066	6.84308					3.03111	4.62639	6.92154				3.02074	3.91485	7.32596
								8.51474	1.40649	7.93721				7.01965	2.81299	4.40581				7.51474	3.51624	5.84302				7.01965	2.21948	5.87442				8.01965	2.40649	6.87442					3.02948	4.62598	6.93721				3.01965	3.91461	7.33576
								8.5141	1.40641	7.95289				7.0188	2.81283	4.42934				7.5141	3.51603	5.88223				7.0188	2.21924	5.90579				8.0188	2.40641	6.90579					3.0282	4.62565	6.95289				3.0188	3.91443	7.34556
								8.51365	1.40636	7.96859				7.0182	2.81271	4.45288				7.51365	3.51589	5.92147				7.0182	2.21907	5.93718				8.0182	2.40636	6.93718					3.0273	4.62542	6.96859				3.0182	3.9143	7.35537
								8.51338	1.40632	7.98429				7.01783	2.81264	4.47644				7.51338	3.5158	5.96073				7.01783	2.21896	5.96859				8.01783	2.40632	6.96859					3.02675	4.62528	6.98429				3.01783	3.91422	7.36518
								8.51328	1.40631	8				7.01771	2.81262	4.5				7.51328	3.51577	6				7.01771	2.21893	6				8.01771	2.40631	7					3.02657	4.62524	7				3.01771	3.9142	7.375
								8.51338	1.40632	8.01571				7.01783	2.81264	4.52356				7.51338	3.5158	6.03927				7.01783	2.21896	6.03141				8.01783	2.40632	7.03141					3.02675	4.62528	7.01571				3.01783	3.91422	7.38482
								8.51365	1.40636	8.03141				7.0182	2.81271	4.54712				7.51365	3.51589	6.07853				7.0182	2.21907	6.06282				8.0182	2.40636	7.06282					3.0273	4.62542	7.03141				3.0182	3.9143	7.39463
								8.5141	1.40641	8.04711				7.0188	2.81283	4.57066				7.5141	3.51603	6.11777				7.0188	2.21924	6.09421				8.0188	2.40641	7.09421					3.0282	4.62565	7.04711				3.0188	3.91443	7.40444
								8.51474	1.40649	8.06279				7.01965	2.81299	4.59419				7.51474	3.51624	6.15698				7.01965	2.21948	6.12558				8.01965	2.40649	7.12558					3.02948	4.62598	7.06279				3.01965	3.91461	7.41424
								8.51556	1.4066	8.07846				7.02074	2.8132	4.61769				7.51556	3.5165	6.19615				7.02074	2.21979	6.15692				8.02074	2.4066	7.15692					3.03111	4.62639	7.07846				3.02074	3.91485	7.42404
								8.51655	1.40673	8.09411				7.02207	2.81345	4.64116				7.51655	3.51681	6.23527				7.02207	2.22018	6.18822				8.02207	2.40673	7.18822					3.03311	4.6269	7.09411				3.02207	3.91513	7.43382
								8.51773	1.40688	8.10973				7.02364	2.81375	4.6646				7.51773	3.51719	6.27434				7.02364	2.22063	6.21947				8.02364	2.40688	7.21947					3.03547	4.6275	7.10973				3.02364	3.91547	7.44358
								8.51909	1.40705	8.12533				7.02546	2.8141	4.688				7.51909	3.51762	6.31333				7.02546	2.22114	6.25067				8.02546	2.40705	7.25067					3.03819	4.62819	7.12533				3.02546	3.91586	7.45333
								8.52063	1.40724	8.1409				7.02751	2.81449	4.71135				7.52063	3.51811	6.35225				7.02751	2.22173	6.2818				8.02751	2.40724	7.2818					3.04127	4.62898	7.1409				3.02751	3.9163	7.46306
								8.52235	1.40746	8.15643				7.02981	2.81493	4.73465				7.52235	3.51866	6.39109				7.02981	2.22239	6.31287				8.02981	2.40746	7.31287					3.04471	4.62985	7.15643				3.02981	3.91679	7.47277
								8.52425	1.4077	8.17193				7.03234	2.81541	4.75789				7.52425	3.51926	6.42982				7.03234	2.22311	6.34386				8.03234	2.4077	7.34386					3.04851	4.63082	7.17193				3.03234	3.91734	7.48246
								8.52633	1.40797	8.18738				7.03511	2.81594	4.78107				7.52633	3.51992	6.46845				7.03511	2.22391	6.37476				8.03511	2.40797	7.37476					3.05267	4.63188	7.18738				3.03511	3.91793	7.49211
								8.52859	1.40826	8.20279				7.03812	2.81651	4.80418				7.52859	3.52064	6.50697				7.03812	2.22477	6.40557				8.03812	2.40826	7.40557					3.05718	4.63302	7.20279				3.03812	3.91858	7.50174
								8.53103	1.40857	8.21814				7.04137	2.81713	4.82721				7.53103	3.52141	6.54536				7.04137	2.2257	6.43629				8.04137	2.40857	7.43629					3.06205	4.63426	7.21814				3.04137	3.91927	7.51134
								8.53364	1.4089	8.23345				7.04485	2.8178	4.85017				7.53364	3.52225	6.58361				7.04485	2.22669	6.46689				8.04485	2.4089	7.46689					3.06728	4.63559	7.23345				3.04485	3.92002	7.5209
								8.53643	1.40925	8.24869				7.04857	2.81851	4.87303				7.53643	3.52313	6.62172				7.04857	2.22776	6.49738				8.04857	2.40925	7.49738					3.07286	4.63701	7.24869				3.04857	3.92082	7.53043
								8.5394	1.40963	8.26387				7.05253	2.81926	4.89581				7.5394	3.52407	6.65968				7.05253	2.22889	6.52775				8.05253	2.40963	7.52775					3.07879	4.63852	7.26387				3.05253	3.92167	7.53992
								8.54254	1.41003	8.27899				7.05672	2.82006	4.91849				7.54254	3.52507	6.69748				7.05672	2.23009	6.55798				8.05672	2.41003	7.55798					3.08507	4.64012	7.27899				3.05672	3.92257	7.54937
								8.54585	1.41045	8.29404				7.06114	2.8209	4.94106				7.54585	3.52613	6.7351				7.06114	2.23135	6.58808				8.06114	2.41045	7.58808					3.09171	4.6418	7.29404				3.06114	3.92352	7.55878
								8.54934	1.41089	8.30902				7.06579	2.82179	4.96353				7.54934	3.52724	6.77254				7.06579	2.23268	6.61803				8.06579	2.41089	7.61803					3.09868	4.64358	7.30902				3.06579	3.92451	7.56814
								8.553	1.41136	8.32392				7.07067	2.82272	4.98588				7.553	3.5284	6.80979				7.07067	2.23408	6.64783				8.07067	2.41136	7.64783					3.10601	4.64544	7.32392				3.07067	3.92556	7.57745
								8.55684	1.41185	8.33874				7.07578	2.8237	5.00811				7.55684	3.52962	6.84684				7.07578	2.23554	6.67748				8.07578	2.41185	7.67748					3.11368	4.64739	7.33874				3.07578	3.92666	7.58671
								8.56084	1.41236	8.35347				7.08113	2.82472	5.03021				7.56084	3.53089	6.88369				7.08113	2.23707	6.70695				8.08113	2.41236	7.70695					3.12169	4.64943	7.35347				3.08113	3.9278	7.59592
								8.56502	1.41289	8.36812				7.08669	2.82578	5.05219				7.56502	3.53222	6.92031				7.08669	2.23867	6.73625				8.08669	2.41289	7.73625					3.13004	4.65155	7.36812				3.08669	3.929	7.60508
								8.56936	1.41344	8.38268				7.09248	2.82688	5.07403				7.56936	3.5336	6.95671				7.09248	2.24032	6.76537				8.09248	2.41344	7.76537					3.13873	4.65376	7.38268				3.09248	3.93024	7.61418
								8.57388	1.41401	8.39715				7.0985	2.82803	5.09572				7.57388	3.53504	6.99287				7.0985	2.24204	6.7943				8.0985	2.41401	7.7943					3.14775	4.65606	7.39715				3.0985	3.93153	7.62322
								8.57856	1.41461	8.41151				7.10474	2.82922	5.11727				7.57856	3.53653	7.02879				7.10474	2.24383	6.82303				8.10474	2.41461	7.82303					3.15711	4.65844	7.41151				3.10474	3.93287	7.6322
								8.5834	1.41523	8.42578				7.1112	2.83045	5.13867				7.5834	3.53807	7.06445				7.1112	2.24568	6.85156				8.1112	2.41523	7.85156					3.1668	4.6609	7.42578				3.1112	3.93426	7.64111
								8.58841	1.41586	8.43994				7.11788	2.83173	5.15991				7.58841	3.53966	7.09985				7.11788	2.24759	6.87988				8.11788	2.41586	7.87988					3.17682	4.66345	7.43994				3.11788	3.93569	7.64996
								8.59358	1.41652	8.45399				7.12478	2.83304	5.18099				7.59358	3.5413	7.13498				7.12478	2.24956	6.90798				8.12478	2.41652	7.90798					3.18716	4.66608	7.45399				3.12478	3.93717	7.65874
								8.59892	1.4172	8.46793				7.13189	2.8344	5.20189				7.59892	3.543	7.16982				7.13189	2.2516	6.93586				8.13189	2.4172	7.93586					3.19783	4.6688	7.46793				3.13189	3.9387	7.66746
								8.60441	1.4179	8.48175				7.13922	2.8358	5.22263				7.60441	3.54475	7.20438				7.13922	2.25369	6.96351				8.13922	2.4179	7.96351					3.20882	4.67159	7.48175				3.13922	3.94027	7.6761
								8.61007	1.41862	8.49546				7.14675	2.83723	5.24319				7.61007	3.54654	7.23865				7.14675	2.25585	6.99092				8.14675	2.41862	7.99092					3.22013	4.67447	7.49546				3.14675	3.94189	7.68466
								8.61588	1.41936	8.50904				7.1545	2.83871	5.26356				7.61588	3.54839	7.2726				7.1545	2.25807	7.01808				8.1545	2.41936	8.01808					3.23176	4.67743	7.50904				3.1545	3.94355	7.69315
								8.62185	1.42012	8.5225				7.16246	2.84023	5.28375				7.62185	3.55029	7.30625				7.16246	2.26035	7.045				8.16246	2.42012	8.045					3.24369	4.68046	7.5225				3.16246	3.94526	7.70156
								8.62797	1.42089	8.53583				7.17063	2.84179	5.30374				7.62797	3.55224	7.33957				7.17063	2.26268	7.07165				8.17063	2.42089	8.07165					3.25594	4.68358	7.53583				3.17063	3.94701	7.70989
								8.63425	1.42169	8.54902				7.179	2.84339	5.32353				7.63425	3.55423	7.37256				7.179	2.26508	7.09805				8.179	2.42169	8.09805					3.2685	4.68677	7.54902				3.179	3.94881	7.71814
								8.64068	1.42251	8.56208				7.18757	2.84502	5.34313				7.64068	3.55628	7.40521				7.18757	2.26753	7.12417				8.18757	2.42251	8.12417					3.28135	4.69004	7.56208				3.18757	3.95065	7.7263
								8.64726	1.42335	8.57501				7.19634	2.84669	5.36251				7.64726	3.55837	7.43751				7.19634	2.27004	7.15001				8.19634	2.42335	8.15001					3.29451	4.69339	7.57501				3.19634	3.95253	7.73438
								8.65398	1.4242	8.58779				7.20531	2.84841	5.38168				7.65398	3.56051	7.46946				7.20531	2.27261	7.17557				8.20531	2.4242	8.17557					3.30797	4.69681	7.58779				3.20531	3.95446	7.74237
								8.66086	1.42508	8.60042				7.21448	2.85015	5.40063				7.66086	3.56269	7.50105				7.21448	2.27523	7.20084				8.21448	2.42508	8.20084					3.32172	4.70031	7.60042				3.21448	3.95642	7.75026
								8.66788	1.42597	8.61291				7.22384	2.85194	5.41936				7.66788	3.56492	7.53227				7.22384	2.27791	7.22581				8.22384	2.42597	8.22581					3.33576	4.70388	7.61291				3.22384	3.95843	7.75807
								8.67504	1.42688	8.62524				7.23339	2.85376	5.43786				7.67504	3.5672	7.56311				7.23339	2.28064	7.25049				8.23339	2.42688	8.25049					3.35009	4.70752	7.62524				3.23339	3.96048	7.76578
								8.68235	1.42781	8.63742				7.24313	2.85562	5.45614				7.68235	3.56953	7.59356				7.24313	2.28343	7.27485				8.24313	2.42781	8.27485					3.3647	4.71124	7.63742				3.24313	3.96257	7.77339
								8.6898	1.42876	8.64945				7.25306	2.85751	5.47417				7.6898	3.57189	7.62362				7.25306	2.28627	7.2989				8.25306	2.42876	8.2989					3.37959	4.71503	7.64945				3.25306	3.9647	7.78091
								8.69738	1.42972	8.66131				7.26318	2.85944	5.49197				7.69738	3.5743	7.65328				7.26318	2.28916	7.32262				8.26318	2.42972	8.32262					3.39476	4.71889	7.66131				3.26318	3.96687	7.78832
								8.7051	1.4307	8.67301				7.27347	2.86141	5.50952				7.7051	3.57676	7.68253				7.27347	2.29211	7.34603				8.27347	2.4307	8.34603					3.4102	4.72281	7.67301				3.27347	3.96908	7.79563
								8.71296	1.4317	8.68455				7.28394	2.8634	5.52682				7.71296	3.57926	7.71137				7.28394	2.29511	7.36909				8.28394	2.4317	8.36909					3.42592	4.72681	7.68455				3.28394	3.97133	7.80284
								8.72095	1.43272	8.69591				7.29459	2.86544	5.54387				7.72095	3.5818	7.73978				7.29459	2.29815	7.39183				8.29459	2.43272	8.39183					3.44189	4.73087	7.69591				3.29459	3.97362	7.80995
								8.72906	1.43375	8.70711				7.30542	2.8675	5.56066				7.72906	3.58438	7.76777				7.30542	2.30125	7.41421				8.30542	2.43375	8.41421					3.45813	4.735	7.70711				3.30542	3.97594	7.81694
								8.73731	1.4348	8.71813				7.31641	2.8696	5.57719				7.73731	3.587	7.79532				7.31641	2.3044	7.43625				8.31641	2.4348	8.43625					3.47462	4.7392	7.71813				3.31641	3.9783	7.82383
								8.74568	1.43586	8.72897				7.32758	2.87173	5.59345				7.74568	3.58966	7.82242				7.32758	2.30759	7.45794				8.32758	2.43586	8.45794					3.49137	4.74346	7.72897				3.32758	3.98069	7.83061
								8.75418	1.43695	8.73963				7.33891	2.87389	5.60945				7.75418	3.59236	7.84908				7.33891	2.31084	7.47926				8.33891	2.43695	8.47926					3.50836	4.74778	7.73963				3.33891	3.98313	7.83727
								8.7628	1.43804	8.75011				7.3504	2.87608	5.62517				7.7628	3.5951	7.87528				7.3504	2.31412	7.50022				8.3504	2.43804	8.50022					3.5256	4.75217	7.75011				3.3504	3.98559	7.84382
								8.77154	1.43915	8.76041				7.36206	2.87831	5.64061				7.77154	3.59788	7.90101				7.36206	2.31746	7.52081				8.36206	2.43915	8.52081					3.54308	4.75661	7.76041				3.36206	3.98809	7.85025
								8.7804	1.44028	8.77051				7.37387	2.88056	5.65577				7.7804	3.6007	7.92628				7.37387	2.32084	7.54103				8.37387	2.44028	8.54103					3.5608	4.76112	7.77051				3.37387	3.99063	7.85657
								8.78937	1.44142	8.78043				7.38583	2.88284	5.67065				7.78937	3.60355	7.95108				7.38583	2.32426	7.56086				8.38583	2.44142	8.56086					3.57875	4.76568	7.78043				3.38583	3.9932	7.86277
								8.79846	1.44258	8.79016				7.39795	2.88515	5.68523				7.79846	3.60644	7.97539				7.39795	2.32773	7.58031				8.39795	2.44258	8.58031					3.59692	4.77031	7.79016				3.39795	3.9958	7.86885
								8.80766	1.44375	8.79968				7.41021	2.88749	5.69953				7.80766	3.60937	7.99921				7.41021	2.33124	7.59937				8.41021	2.44375	8.59937					3.61532	4.77498	7.79968				3.41021	3.99843	7.8748
								8.81697	1.44493	8.80902				7.42263	2.88986	5.71353				7.81697	3.61233	8.02254				7.42263	2.33479	7.61803				8.42263	2.44493	8.61803					3.63394	4.77972	7.80902				3.42263	4.00109	7.88064
								8.82638	1.44613	8.81815				7.43518	2.89225	5.72722				7.82638	3.61532	8.04537				7.43518	2.33838	7.6363				8.43518	2.44613	8.6363					3.65277	4.78451	7.81815				3.43518	4.00379	7.88634
								8.8359	1.44734	8.82708				7.44787	2.89468	5.74062				7.8359	3.61835	8.0677				7.44787	2.34201	7.65416				8.44787	2.44734	8.65416					3.67181	4.78935	7.82708				3.44787	4.00651	7.89193
								8.84553	1.44856	8.83581				7.4607	2.89712	5.75371				7.84553	3.6214	8.08952				7.4607	2.34569	7.67161				8.4607	2.44856	8.67161					3.69105	4.79425	7.83581				3.4607	4.00926	7.89738
								8.85525	1.4498	8.84433				7.47366	2.8996	5.76649				7.85525	3.6245	8.11082				7.47366	2.34939	7.68866				8.47366	2.4498	8.68866					3.7105	4.79919	7.84433				3.47366	4.01205	7.9027
								8.86507	1.45105	8.85264				7.48676	2.90209	5.77896				7.86507	3.62762	8.1316				7.48676	2.35314	7.70528				8.48676	2.45105	8.70528					3.73013	4.80419	7.85264				3.48676	4.01486	7.9079
								8.87498	1.45231	8.86074				7.49998	2.90462	5.79111				7.87498	3.63077	8.15186				7.49998	2.35692	7.72148				8.49998	2.45231	8.72148					3.74996	4.80923	7.86074				3.49998	4.01769	7.91296
								8.88499	1.45358	8.86863				7.51332	2.90716	5.80295				7.88499	3.63395	8.17158				7.51332	2.36074	7.73726				8.51332	2.45358	8.73726					3.76998	4.81432	7.86863				3.51332	4.02056	7.91789
								8.89508	1.45486	8.87631				7.52678	2.90973	5.81446				7.89508	3.63716	8.19077				7.52678	2.36459	7.75261				8.52678	2.45486	8.75261					3.79017	4.81946	7.87631				3.52678	4.02344	7.92269
								8.90527	1.45616	8.88377				7.54036	2.91232	5.82565				7.90527	3.6404	8.20941				7.54036	2.36848	7.76753				8.54036	2.45616	8.76753					3.81054	4.82464	7.88377				3.54036	4.02636	7.92735
								8.91554	1.45747	8.89101				7.55405	2.91493	5.83651				7.91554	3.64366	8.22752				7.55405	2.3724	7.78201				8.55405	2.45747	8.78201					3.83108	4.82986	7.89101				3.55405	4.0293	7.93188
								8.92589	1.45878	8.89803				7.56785	2.91756	5.84704				7.92589	3.64695	8.24507				7.56785	2.37635	7.79606				8.56785	2.45878	8.79606					3.85178	4.83513	7.89803				3.56785	4.03226	7.93627
								8.93632	1.46011	8.90483				7.58176	2.92022	5.85724				7.93632	3.65027	8.26207				7.58176	2.38033	7.80965				8.58176	2.46011	8.80965					3.87264	4.84043	7.90483				3.58176	4.03524	7.94052
								8.94683	1.46144	8.9114				7.59577	2.92289	5.8671				7.94683	3.65361	8.27851				7.59577	2.38433	7.82281				8.59577	2.46144	8.82281					3.89366	4.84578	7.9114				3.59577	4.03825	7.94463
								8.95742	1.46279	8.91775				7.60989	2.92558	5.87663				7.95742	3.65698	8.29439				7.60989	2.38837	7.83551				8.60989	2.46279	8.83551					3.91483	4.85116	7.91775				3.60989	4.04128	7.9486
								8.96807	1.46415	8.92388				7.62409	2.92829	5.88582				7.96807	3.66037	8.3097				7.62409	2.39244	7.84776				8.62409	2.46415	8.84776					3.93614	4.85658	7.92388				3.62409	4.04433	7.95242
								8.9788	1.46551	8.92978				7.6384	2.93102	5.89466				7.9788	3.66378	8.32444				7.6384	2.39653	7.85955				8.6384	2.46551	8.85955					3.95759	4.86204	7.92978				3.6384	4.0474	7.95611
								8.98959	1.46688	8.93544				7.65279	2.93377	5.90317				7.98959	3.66721	8.33861				7.65279	2.40065	7.87089				8.65279	2.46688	8.87089					3.97918	4.86753	7.93544				3.65279	4.05049	7.95965
								9.00045	1.46826	8.94088				7.66726	2.93653	5.91132				8.00045	3.67066	8.3522				7.66726	2.40479	7.88176				8.66726	2.46826	8.88176					4.00089	4.87305	7.94088				3.66726	4.05359	7.96305
								9.01137	1.46965	8.94609				7.68182	2.9393	5.91913				8.01137	3.67413	8.36521				7.68182	2.40896	7.89217				8.68182	2.46965	8.89217					4.02273	4.87861	7.94609				3.68182	4.05672	7.9663
								9.02234	1.47105	8.95106				7.69646	2.9421	5.92658				8.02234	3.67762	8.37764				7.69646	2.41314	7.90211				8.69646	2.47105	8.90211					4.04468	4.88419	7.95106				3.69646	4.05986	7.96941
								9.03338	1.47245	8.95579				7.71117	2.9449	5.93369				8.03338	3.68113	8.38948				7.71117	2.41735	7.91159				8.71117	2.47245	8.91159					4.06675	4.8898	7.95579				3.71117	4.06302	7.97237
								9.04446	1.47386	8.96029				7.72595	2.94772	5.94044				8.04446	3.68465	8.40073				7.72595	2.42158	7.92059				8.72595	2.47386	8.92059					4.08893	4.89544	7.96029				3.72595	4.06619	7.97518
								9.0556	1.47528	8.96456				7.7408	2.95056	5.94684				8.0556	3.68819	8.41139				7.7408	2.42583	7.92911				8.7408	2.47528	8.92911					4.1112	4.90111	7.96456				3.7408	4.06937	7.97785
								9.06679	1.4767	8.96858				7.75572	2.9534	5.95287				8.06679	3.69175	8.42146				7.75572	2.4301	7.93717				8.75572	2.4767	8.93717					4.13357	4.9068	7.96858				3.75572	4.07258	7.98036
								9.07802	1.47813	8.97237				7.77069	2.95626	5.95855				8.07802	3.69532	8.43092				7.77069	2.43439	7.94474				8.77069	2.47813	8.94474					4.15603	4.91251	7.97237				3.77069	4.07579	7.98273
								9.08929	1.47956	8.97592				7.78572	2.95912	5.96388				8.08929	3.69891	8.43979				7.78572	2.43869	7.95183				8.78572	2.47956	8.95183					4.17858	4.91825	7.97592				3.78572	4.07901	7.98495
								9.1006	1.481	8.97922				7.8008	2.962	5.96883				8.1006	3.7025	8.44806				7.8008	2.443	7.95845				8.8008	2.481	8.95845					4.20121	4.924	7.97922				3.8008	4.08225	7.98701
								9.11195	1.48244	8.98229				7.81594	2.96489	5.97343				8.11195	3.70611	8.45572				7.81594	2.44733	7.96457				8.81594	2.48244	8.96457					4.22391	4.92978	7.98229				3.81594	4.0855	7.98893
								9.12334	1.48389	8.98511				7.83112	2.96778	5.97766				8.12334	3.70973	8.46277				7.83112	2.45168	7.97022				8.83112	2.48389	8.97022					4.24667	4.93557	7.98511				3.83112	4.08876	7.99069
								9.13475	1.48534	8.98769				7.84634	2.97069	5.98153				8.13475	3.71336	8.46922				7.84634	2.45603	7.97538				8.84634	2.48534	8.97538					4.2695	4.94137	7.98769				3.84634	4.09202	7.99231
								9.1462	1.4868	8.99002				7.86159	2.9736	5.98504				8.1462	3.717	8.47506				7.86159	2.4604	7.98005				8.86159	2.4868	8.98005					4.29239	4.9472	7.99002				3.86159	4.0953	7.99376
								9.15767	1.48826	8.99211				7.87689	2.97651	5.98817				8.15767	3.72064	8.48029				7.87689	2.46477	7.98423				8.87689	2.48826	8.98423					4.31533	4.95303	7.99211				3.87689	4.09858	7.99507
								9.16916	1.48972	8.99396				7.89221	2.97944	5.99094				8.16916	3.7243	8.4849				7.89221	2.46916	7.98792				8.89221	2.48972	8.98792					4.33831	4.95888	7.99396				3.89221	4.10187	7.99623
								9.18067	1.49118	8.99556				7.90756	2.98237	5.99334				8.18067	3.72796	8.4889				7.90756	2.47355	7.99112				8.90756	2.49118	8.99112					4.36134	4.96473	7.99556				3.90756	4.10516	7.99723
								9.1922	1.49265	8.99692				7.92293	2.9853	5.99538				8.1922	3.73162	8.49229				7.92293	2.47795	7.99383				8.92293	2.49265	8.99383					4.3844	4.9706	7.99692				3.92293	4.10846	7.99807
								9.20374	1.49412	8.99803				7.93832	2.98823	5.99704				8.20374	3.73529	8.49507				7.93832	2.48235	7.99605				8.93832	2.49412	8.99605					4.40748	4.97647	7.99803				3.93832	4.11176	7.99877
								9.2153	1.49559	8.99889				7.95373	2.99117	5.99833				8.2153	3.73897	8.49722				7.95373	2.48676	7.99778				8.95373	2.49559	8.99778					4.43059	4.98235	7.99889				3.95373	4.11507	7.99931
								9.22686	1.49706	8.99951				7.96915	2.99411	5.99926				8.22686	3.74264	8.49877				7.96915	2.49117	7.99901				8.96915	2.49706	8.99901					4.45372	4.98823	7.99951				3.96915	4.11838	7.99969
								9.23843	1.49853	8.99988				7.98457	2.99706	5.99981				8.23843	3.74632	8.49969				7.98457	2.49559	7.99975				8.98457	2.49853	8.99975					4.47686	4.99411	7.99988				3.98457	4.12169	7.99992
								9.25	1.5	9				8	3	6				8.25	3.75	8.5				8	2.5	8				9	2.5	9					4.5	5	8				4	4.125	8
								9.25	1.5	7				8	3	3				8.25	3.75	3.5				8	2.5	4				9	2.5	5					4.5	5	6				4	4.125	6.75
								9.2385	1.49829	7.00012				7.98467	2.99657	3.00019				8.2385	3.74572	3.50031				7.98467	2.49486	4.00025				8.98467	2.49829	5.00025					4.47701	4.99315	6.00012				3.98467	4.12115	6.75008
								9.22701	1.49657	7.00049				7.96935	2.99315	3.00074				8.22701	3.74143	3.50123				7.96935	2.48972	4.00099				8.96935	2.49657	5.00099					4.45402	4.9863	6.00049				3.96935	4.11729	6.75031
								9.21552	1.49486	7.00111				7.95403	2.98972	3.00167				8.21552	3.73716	3.50278				7.95403	2.48459	4.00222				8.95403	2.49486	5.00222					4.43104	4.97945	6.00111				3.95403	4.11344	6.75069
								9.20404	1.49315	7.00197				7.93872	2.9863	3.00296				8.20404	3.73288	3.50493				7.93872	2.47945	4.00395				8.93872	2.49315	5.00395					4.40808	4.97261	6.00197				3.93872	4.10959	6.75123
								9.19257	1.49144	7.00308				7.92343	2.98288	3.00462				8.19257	3.72861	3.50771				7.92343	2.47433	4.00617				8.92343	2.49144	5.00617					4.38515	4.96577	6.00308				3.92343	4.10575	6.75193
								9.18112	1.48974	7.00444				7.90816	2.97947	3.00666				8.18112	3.72434	3.5111				7.90816	2.46921	4.00888				8.90816	2.48974	5.00888					4.36224	4.95894	6.00444				3.90816	4.1019	6.75277
								9.16968	1.48803	7.00604				7.89291	2.97606	3.00906				8.16968	3.72008	3.5151				7.89291	2.46409	4.01208				8.89291	2.48803	5.01208					4.33936	4.95212	6.00604				3.89291	4.09807	6.75377
								9.15826	1.48633	7.00789				7.87769	2.97266	3.01183				8.15826	3.71582	3.51971				7.87769	2.45899	4.01577				8.87769	2.48633	5.01577					4.31653	4.94532	6.00789				3.87769	4.09424	6.75493
								9.14687	1.48463	7.00998				7.86249	2.96926	3.01496				8.14687	3.71158	3.52494				7.86249	2.4539	4.01995				8.86249	2.48463	5.01995					4.29374	4.93853	6.00998				3.86249	4.09042	6.75624
								9.1355	1.48294	7.01231				7.84733	2.96587	3.01847				8.1355	3.70734	3.53078				7.84733	2.44881	4.02462				8.84733	2.48294	5.02462					4.271	4.93175	6.01231				3.84733	4.08661	6.75769
								9.12416	1.48125	7.01489				7.83221	2.96249	3.02234				8.12416	3.70312	3.53723				7.83221	2.44374	4.02978				8.83221	2.48125	5.02978					4.24832	4.92499	6.01489				3.83221	4.08281	6.75931
								9.11285	1.47956	7.01771				7.81713	2.95912	3.02657				8.11285	3.69891	3.54428				7.81713	2.43869	4.03543				8.81713	2.47956	5.03543					4.2257	4.91825	6.01771				3.81713	4.07901	6.76107
								9.10157	1.47788	7.02078				7.8021	2.95576	3.03117				8.10157	3.6947	3.55194				7.8021	2.43364	4.04155				8.8021	2.47788	5.04155					4.20314	4.91153	6.02078				3.8021	4.07523	6.76299
								9.09033	1.47621	7.02408				7.78711	2.95241	3.03612				8.09033	3.69052	3.56021				7.78711	2.42862	4.04817				8.78711	2.47621	5.04817					4.18067	4.90483	6.02408				3.78711	4.07147	6.76505
								9.07913	1.47454	7.02763				7.77218	2.94908	3.04145				8.07913	3.68634	3.56908				7.77218	2.42361	4.05526				8.77218	2.47454	5.05526					4.15827	4.89815	6.02763				3.77218	4.06771	6.76727
								9.06797	1.47287	7.03142				7.7573	2.94575	3.04713				8.06797	3.68219	3.57854				7.7573	2.41862	4.06283				8.7573	2.47287	5.06283					4.13595	4.8915	6.03142				3.7573	4.06397	6.76964
								9.05686	1.47122	7.03544				7.74248	2.94244	3.05316				8.05686	3.67805	3.58861				7.74248	2.41366	4.07089				8.74248	2.47122	5.07089					4.11372	4.88488	6.03544				3.74248	4.06024	6.77215
								9.0458	1.46957	7.03971				7.72773	2.93914	3.05956				8.0458	3.67392	3.59927				7.72773	2.40871	4.07941				8.72773	2.46957	5.07941					4.09159	4.87828	6.03971				3.72773	4.05653	6.77482
								9.03478	1.46793	7.04421				7.71304	2.93586	3.06631				8.03478	3.66982	3.61052				7.71304	2.40379	4.08841				8.71304	2.46793	5.08841					4.06956	4.87171	6.04421				3.71304	4.05284	6.77763
								9.02382	1.4663	7.04894				7.69843	2.93259	3.07342				8.02382	3.66574	3.62236				7.69843	2.39889	4.09789				8.69843	2.4663	5.09789					4.04764	4.86518	6.04894				3.69843	4.04916	6.78059
								9.01291	1.46467	7.05391				7.68388	2.92934	3.08087				8.01291	3.66167	3.63479				7.68388	2.39401	4.10783				8.68388	2.46467	5.10783					4.02583	4.85868	6.05391				3.68388	4.04551	6.7837
								9.00206	1.46305	7.05912				7.66942	2.92611	3.08868				8.00206	3.65763	3.6478				7.66942	2.38916	4.11824				8.66942	2.46305	5.11824					4.00413	4.85221	6.05912				3.66942	4.04187	6.78695
								8.99128	1.46145	7.06456				7.65504	2.92289	3.09683				7.99128	3.65361	3.66139				7.65504	2.38434	4.12911				8.65504	2.46145	5.12911					3.98256	4.84578	6.06456				3.65504	4.03825	6.79035
								8.98056	1.45985	7.07022				7.64074	2.9197	3.10534				7.98056	3.64962	3.67556				7.64074	2.37954	4.14045				8.64074	2.45985	5.14045					3.96111	4.83939	6.07022				3.64074	4.03466	6.79389
								8.9699	1.45826	7.07612				7.62653	2.91652	3.11418				7.9699	3.64565	3.6903				7.62653	2.37478	4.15224				8.62653	2.45826	5.15224					3.9398	4.83304	6.07612				3.62653	4.03109	6.79758
								8.95931	1.45668	7.08225				7.61242	2.91336	3.12337				7.95931	3.64171	3.70561				7.61242	2.37005	4.16449				8.61242	2.45668	5.16449					3.91863	4.82673	6.08225				3.61242	4.02754	6.8014
								8.9488	1.45512	7.0886				7.5984	2.91023	3.1329				7.9488	3.63779	3.72149				7.5984	2.36535	4.17719				8.5984	2.45512	5.17719					3.89759	4.82046	6.0886				3.5984	4.02401	6.80537
								8.93836	1.45356	7.09517				7.58447	2.90712	3.14276				7.93836	3.6339	3.73793				7.58447	2.36068	4.19035				8.58447	2.45356	5.19035					3.87671	4.81424	6.09517				3.58447	4.02051	6.80948
								8.92799	1.45202	7.10197				7.57066	2.90403	3.15296				7.92799	3.63004	3.75493				7.57066	2.35605	4.20394				8.57066	2.45202	5.20394					3.85598	4.80806	6.10197				3.57066	4.01703	6.81373
								8.91771	1.45048	7.10899				7.55694	2.90097	3.16349				7.91771	3.62621	3.77248				7.55694	2.35145	4.21799				8.55694	2.45048	5.21799					3.83541	4.80193	6.10899				3.55694	4.01359	6.81812
								8.9075	1.44896	7.11623				7.54334	2.89792	3.17435				7.9075	3.62241	3.79059				7.54334	2.34689	4.23247				8.54334	2.44896	5.23247					3.81501	4.79585	6.11623				3.54334	4.01016	6.82265
								8.89739	1.44745	7.12369				7.52985	2.89491	3.18554				7.89739	3.61864	3.80923				7.52985	2.34236	4.24739				8.52985	2.44745	5.24739					3.79477	4.78982	6.12369				3.52985	4.00677	6.82731
								8.88736	1.44596	7.13137				7.51647	2.89192	3.19705				7.88736	3.6149	3.82842				7.51647	2.33788	4.26274				8.51647	2.44596	5.26274					3.77471	4.78384	6.13137				3.51647	4.00341	6.83211
								8.87741	1.44448	7.13926				7.50322	2.88896	3.20889				7.87741	3.6112	3.84814				7.50322	2.33343	4.27852				8.50322	2.44448	5.27852					3.75483	4.77791	6.13926				3.50322	4.00008	6.83704
								8.86756	1.44301	7.14736				7.49008	2.88602	3.22104				7.86756	3.60753	3.8684				7.49008	2.32903	4.29472				8.49008	2.44301	5.29472					3.73513	4.77204	6.14736				3.49008	3.99677	6.8421
								8.85781	1.44156	7.15567				7.47708	2.88311	3.23351				7.85781	3.60389	3.88918				7.47708	2.32467	4.31134				8.47708	2.44156	5.31134					3.71562	4.76623	6.15567				3.47708	3.9935	6.8473
								8.84815	1.44012	7.16419				7.4642	2.88023	3.24629				7.84815	3.60029	3.91048				7.4642	2.32035	4.32839				8.4642	2.44012	5.32839					3.6963	4.76047	6.16419				3.4642	3.99026	6.85262
								8.83859	1.43869	7.17292				7.45145	2.87739	3.25938				7.83859	3.59673	3.9323				7.45145	2.31608	4.34584				8.45145	2.43869	5.34584					3.67718	4.75477	6.17292				3.45145	3.98706	6.85807
								8.82913	1.43728	7.18185				7.43884	2.87457	3.27278				7.82913	3.59321	3.95463				7.43884	2.31185	4.3637				8.43884	2.43728	5.3637					3.65826	4.74913	6.18185				3.43884	3.98389	6.86366
								8.81978	1.43589	7.19098				7.42637	2.87178	3.28647				7.81978	3.58972	3.97746				7.42637	2.30767	4.38197				8.42637	2.43589	5.38197					3.63956	4.74356	6.19098				3.42637	3.98075	6.86936
								8.81053	1.43451	7.20032				7.41404	2.86902	3.30047				7.81053	3.58628	4.00079				7.41404	2.30353	4.40063				8.41404	2.43451	5.40063					3.62106	4.73804	6.20032				3.41404	3.97765	6.8752
								8.80139	1.43315	7.20984				7.40185	2.8663	3.31477				7.80139	3.58287	4.02461				7.40185	2.29945	4.41969				8.40185	2.43315	5.41969					3.60278	4.7326	6.20984				3.40185	3.97459	6.88115
								8.79236	1.4318	7.21957				7.38982	2.86361	3.32935				7.79236	3.57951	4.04892				7.38982	2.29541	4.43914				8.38982	2.4318	5.43914					3.58472	4.72722	6.21957				3.38982	3.97156	6.88723
								8.78345	1.43048	7.22949				7.37793	2.86095	3.34423				7.78345	3.57619	4.07372				7.37793	2.29143	4.45897				8.37793	2.43048	5.45897					3.56689	4.7219	6.22949				3.37793	3.96857	6.89343
								8.77464	1.42916	7.23959				7.36619	2.85833	3.35939				7.77464	3.57291	4.09899				7.36619	2.28749	4.47919				8.36619	2.42916	5.47919					3.54929	4.71665	6.23959				3.36619	3.96562	6.89975
								8.76596	1.42787	7.24989				7.35461	2.85574	3.37483				7.76596	3.56967	4.12472				7.35461	2.28361	4.49978				8.35461	2.42787	5.49978					3.53192	4.71148	6.24989				3.35461	3.96271	6.90618
								8.7574	1.42659	7.26037				7.3432	2.85319	3.39055				7.7574	3.56648	4.15092				7.3432	2.27978	4.52074				8.3432	2.42659	5.52074					3.51479	4.70637	6.26037				3.3432	3.95984	6.91273
								8.74895	1.42534	7.27103				7.33194	2.85067	3.40655				7.74895	3.56334	4.17758				7.33194	2.27601	4.54206				8.33194	2.42534	5.54206					3.49791	4.70134	6.27103				3.33194	3.957	6.91939
								8.74064	1.4241	7.28187				7.32085	2.84819	3.42281				7.74064	3.56024	4.20468				7.32085	2.27229	4.56375				8.32085	2.4241	5.56375					3.48127	4.69638	6.28187				3.32085	3.95422	6.92617
								8.73244	1.42287	7.29289				7.30992	2.84575	3.43934				7.73244	3.55719	4.23223				7.30992	2.26862	4.58579				8.30992	2.42287	5.58579					3.46488	4.6915	6.29289				3.30992	3.95147	6.93306
								8.72438	1.42167	7.30409				7.29917	2.84335	3.45613				7.72438	3.55418	4.26022				7.29917	2.26502	4.60817				8.29917	2.42167	5.60817					3.44875	4.68669	6.30409				3.29917	3.94876	6.94005
								8.71644	1.42049	7.31545				7.28859	2.84098	3.47318				7.71644	3.55123	4.28863				7.28859	2.26147	4.63091				8.28859	2.42049	5.63091					3.43288	4.68196	6.31545				3.28859	3.9461	6.94716
								8.70864	1.41933	7.32699				7.27818	2.83865	3.49048				7.70864	3.54832	4.31747				7.27818	2.25798	4.65397				8.27818	2.41933	5.65397					3.41727	4.67731	6.32699				3.27818	3.94349	6.95437
								8.70097	1.41818	7.33869				7.26795	2.83637	3.50803				7.70097	3.54546	4.34672				7.26795	2.25455	4.67738				8.26795	2.41818	5.67738					3.40193	4.67274	6.33869				3.26795	3.94091	6.96168
								8.69343	1.41706	7.35055				7.25791	2.83412	3.52583				7.69343	3.54265	4.37638				7.25791	2.25118	4.7011				8.25791	2.41706	5.7011					3.38686	4.66825	6.35055				3.25791	3.93839	6.96909
								8.68603	1.41596	7.36258				7.24804	2.83192	3.54386				7.68603	3.5399	4.40644				7.24804	2.24788	4.72515				8.24804	2.41596	5.72515					3.37206	4.66384	6.36258				3.24804	3.93591	6.97661
								8.67877	1.41488	7.37476				7.23836	2.82975	3.56214				7.67877	3.53719	4.43689				7.23836	2.24463	4.74951				8.23836	2.41488	5.74951					3.35755	4.65951	6.37476				3.23836	3.93347	6.98422
								8.67166	1.41382	7.38709				7.22887	2.82763	3.58064				7.67166	3.53454	4.46773				7.22887	2.24145	4.77419				8.22887	2.41382	5.77419					3.34331	4.65527	6.38709				3.22887	3.93109	6.99193
								8.66468	1.41278	7.39958				7.21957	2.82555	3.59937				7.66468	3.53194	4.49895				7.21957	2.23833	4.79916				8.21957	2.41278	5.79916					3.32936	4.65111	6.39958				3.21957	3.92875	6.99974
								8.65785	1.41176	7.41221				7.21047	2.82352	3.61832				7.65785	3.5294	4.53054				7.21047	2.23528	4.82443				8.21047	2.41176	5.82443					3.3157	4.64704	6.41221				3.21047	3.92646	7.00763
								8.65117	1.41076	7.42499				7.20155	2.82153	3.63749				7.65117	3.52691	4.56249				7.20155	2.23229	4.84999				8.20155	2.41076	5.84999					3.30233	4.64305	6.42499				3.20155	3.92422	7.01562
								8.64463	1.40979	7.43792				7.19284	2.81958	3.65687				7.64463	3.52447	4.59479				7.19284	2.22937	4.87583				8.19284	2.40979	5.87583					3.28926	4.63916	6.43792				3.19284	3.92203	7.0237
								8.63824	1.40884	7.45098				7.18432	2.81767	3.67647				7.63824	3.52209	4.62744				7.18432	2.22651	4.90195				8.18432	2.40884	5.90195					3.27648	4.63535	6.45098				3.18432	3.91988	7.03186
								8.632	1.40791	7.46417				7.17601	2.81582	3.69626				7.632	3.51977	4.66043				7.17601	2.22372	4.92835				8.17601	2.40791	5.92835					3.26401	4.63163	6.46417				3.17601	3.91779	7.04011
								8.62592	1.407	7.4775				7.16789	2.814	3.71625				7.62592	3.5175	4.69375				7.16789	2.221	4.955				8.16789	2.407	5.955					3.25184	4.628	6.4775				3.16789	3.91575	7.04844
								8.61999	1.40612	7.49096				7.15999	2.81223	3.73644				7.61999	3.51529	4.7274				7.15999	2.21835	4.98192				8.15999	2.40612	5.98192					3.23998	4.62447	6.49096				3.15999	3.91376	7.05685
								8.61422	1.40526	7.50454				7.15229	2.81051	3.75681				7.61422	3.51314	4.76135				7.15229	2.21577	5.00908				8.15229	2.40526	6.00908					3.22843	4.62103	6.50454				3.15229	3.91183	7.06534
								8.6086	1.40442	7.51825				7.1448	2.80884	3.77737				7.6086	3.51105	4.79562				7.1448	2.21326	5.03649				8.1448	2.40442	6.03649					3.2172	4.61768	6.51825				3.1448	3.90994	7.0739
								8.60314	1.40361	7.53207				7.13752	2.80721	3.79811				7.60314	3.50902	4.83018				7.13752	2.21082	5.06414				8.13752	2.40361	6.06414					3.20628	4.61443	6.53207				3.13752	3.90811	7.08254
								8.59784	1.40282	7.54601				7.13045	2.80563	3.81901				7.59784	3.50704	4.86502				7.13045	2.20845	5.09202				8.13045	2.40282	6.09202					3.19568	4.61127	6.54601				3.13045	3.90634	7.09126
								8.5927	1.40205	7.56006				7.1236	2.8041	3.84009				7.5927	3.50513	4.90015				7.1236	2.20615	5.12012				8.1236	2.40205	6.12012					3.1854	4.6082	6.56006				3.1236	3.90461	7.10004
								8.58772	1.40131	7.57422				7.11696	2.80262	3.86133				7.58772	3.50327	4.93555				7.11696	2.20393	5.14844				8.11696	2.40131	6.14844					3.17545	4.60524	6.57422				3.11696	3.90295	7.10889
								8.58291	1.40059	7.58849				7.11055	2.80118	3.88273				7.58291	3.50148	4.97121				7.11055	2.20178	5.17697				8.11055	2.40059	6.17697					3.16582	4.60237	6.58849				3.11055	3.90133	7.1178
								8.57826	1.3999	7.60285				7.10435	2.7998	3.90428				7.57826	3.49975	5.00713				7.10435	2.1997	5.2057				8.10435	2.3999	6.2057					3.15652	4.5996	6.60285				3.10435	3.89977	7.12678
								8.57378	1.39923	7.61732				7.09837	2.79846	3.92597				7.57378	3.49808	5.04329				7.09837	2.19769	5.23463				8.09837	2.39923	6.23463					3.14756	4.59692	6.61732				3.09837	3.89827	7.13582
[truncated: 38,918 more rows]
[truncated: 49 more columns]

## Sheet: Figure 3b
Figure 3b
	P2																P3									C1
[truncated: 58 more rows]

## Sheet: Figure 3c
Figure 3c
[truncated: 249 more rows]

[truncated: 39 more sheets: Figure 3d, Figure 4a, Figure 4b, Figure 4c, Figure 4d, Figure 4e, Figure 5, Figure 6a, Figure 6b, Figure 6c, Figure 7a, Figure 7b, Figure 7c, Figure 7d, Figure 7e, Figure 8a, Figure 8b, Figure_S1a, Figure_S2a, Figure_S2b …]
